# Supplementary material for: Single-cell RNA sequencing of the Strongylocentrotus purpuratus larva reveals the blueprint of major cell types and nervous system of a non-chordate deuterostome
Source: eLife. 2021 Nov 25;10:e70416. doi: 10.7554/eLife.70416 (PMC8683087; doi:10.7554/eLife.70416)
Supplement: Supplementary file 1. [file elife-70416-supp1.xlsx]

## Sheet: Sp_3dpf_marker_genes
p_val	avg_logFC	pct.1	pct.2	p_val_adj	cluster	gene	name	NCBI.anotation	SPU.ID	GOterm	PFAM.term	Functional.term
0	1.7138	0.668	0.176	0	ciliary band	WHL22.397681	Sp-FbsL_2	uncharacterized LOC585965 (LOC585965), mRNA	SPU_000381	NA	NA	NA
0	1.06592	0.974	0.814	0	ciliary band	WHL22.521547	Sp-Calm1	calmodulin-A-like (LOC105443934), mRNA	SPU_005033	calcium ion binding	EF hand; EF-hand domain pair; EF-hand domain pair	CalciumToolkit
1.48778e-277	1.04759	0.751	0.346	2.31781e-273	ciliary band	WHL22.438629	Sp-Ckb	arginine kinase (LOC762696), mRNA	SPU_015323	catalytic activity; kinase activity; transferase activity; transferring phosphorus-containing groups	ATP:guanido phosphotransferase, C-terminal catalytic domain	Metabolism_Energy
9.99966e-255	1.03253	0.233	0.033	1.55785e-250	ciliary band	WHL22.95189	WHL22.95189	collagen triple helix repeat-containing protein 1 (LOC586840), mRNA	NA	NA	NA	NA
2.55821e-232	0.79251	0.961	0.816	3.98544e-228	ciliary band	WHL22.54099	WHL22.54099	histone H2 A.F/Z (H2A.F/Z), mRNA	NA	NA	NA	NA
5.75024e-213	0.771863	0.136	0.012	8.9583e-209	ciliary band	WHL22.179065	Sp-B4galt5_1	beta-1,4-galactosyltransferase 5 (LOC583786), mRNA	SPU_009773	carbohydrate metabolic process; transferase activity; transferring glycosyl groups	N-terminal region of glycosyl transferase group 7; N-terminal domain of galactosyltransferase	Metabolism_Carbohydrate
1.47965e-212	1.23426	0.917	0.717	2.30514e-208	ciliary band	WHL22.586081	Sp-Btub2; Sp-Btub3	beta-tubulin (SP-beta1) (LOC373275), transcript variant X1, mRNA	SPU_000061; SPU_000062	GTP catabolic process; microtubule-based process; protein polymerization; GTPase activity; structural constituent of cytoskeleton; GTP binding; microtubule; protein complex	Tubulin/FtsZ family, GTPase domain; Tubulin C-terminal domain; Misato Segment II tubulin-like domain	NA
1.54064e-204	1.10586	0.859	0.631	2.40016e-200	ciliary band	WHL22.130781	SPU_013329	protein SPEC3-like (LOC578575), mRNA	SPU_013329	NA	Ectodermal ciliogenesis protein	NA
2.77156e-164	0.955755	0.366	0.117	4.31782e-160	ciliary band	WHL22.736504	Sp-Wdr86; SPU_026889	WD repeat-containing protein 86 (LOC100888294), mRNA	SPU_016147; SPU_026889	protein binding	WD domain, G-beta repeat; Anaphase-promoting complex subunit 4 WD40 domain; Nucleoporin Nup120/160	Unclassified
1.18604e-161	0.940973	0.368	0.117	1.84773e-157	ciliary band	WHL22.188087	SPU_021662	glutathione S-transferase theta-1 (LOC582092), mRNA	SPU_021662	protein binding	Glutathione S-transferase, N-terminal domain; Glutathione S-transferase, N-terminal domain	Transferase
1.4655e-159	0.958222	0.414	0.147	2.2831e-155	ciliary band	WHL22.164042	WHL22.164042	arginine kinase (LOC580962), mRNA	NA	NA	NA	NA
1.75272e-149	0.7609	0.157	0.025	2.73056e-145	ciliary band	WHL22.224777	Sp-Egfrp	microfibril-associated glycoprotein 4 (LOC582445), mRNA	SPU_004845	calcium ion binding; protein binding	EGF-like domain; Human growth factor-like EGF; Fibrinogen beta and gamma chains, C-terminal globular domain	BloodProtein
1.43175e-147	0.869525	0.391	0.133	2.23053e-143	ciliary band	WHL22.703955	Sp-Rrm1; Sp-Rrm1_1	ribonucleoside-diphosphate reductase large subunit (LOC581431), mRNA	SPU_002482; SPU_024541	DNA replication; oxidation-reduction process; ribonucleoside-diphosphate reductase activity; thioredoxindisulfide as acceptor; ATP binding; ribonucleoside-diphosphate reductase complex	Ribonucleotide reductase, barrel domain; Ribonucleotide reductase, all-alpha domain; ATP cone domain	Metabolism_Nucleotide
2.7407e-137	1.0364	0.453	0.186	4.26974e-133	ciliary band	WHL22.761240	SPU_016582; SPU_017442; Sp-Pcna	proliferating cell nuclear antigen (LOC765052), mRNA	SPU_016582; SPU_017442; SPU_023334	regulation of DNA replication; DNA binding; DNA polymerase processivity factor activity; PCNA complex	Proliferating cell nuclear antigen, C-terminal domain	DNA_ReplicationFactor
1.18508e-125	0.823542	0.278	0.082	1.84623e-121	ciliary band	WHL22.72065	Sp-Slc20a1_2; Sp-Slc20a1	sodium-dependent phosphate transporter 2 (LOC582615), mRNA	SPU_019683; SPU_024790	phosphate ion transport; inorganic phosphate transmembrane transporter activity; membrane	Phosphate transporter family	Metabolism_InorganicIon
3.54074e-123	0.299167	0.991	0.972	5.51611e-119	ciliary band	WHL22.534848	Sp-Rpl17; Sp-Rpl17_1	60S ribosomal protein L17 (LOC586769), mRNA	SPU_014454; SPU_015818	translation; structural constituent of ribosome; intracellular; ribosome; large ribosomal subunit	Ribosomal protein L22p/L17e	Translation_RibosomalProtein
2.89619e-116	0.685195	0.192	0.046	4.51197e-112	ciliary band	WHL22.224438	WHL22.224438	uncharacterized LOC100891526 (LOC100891526), transcript variant X1, mRNA	NA	NA	NA	NA
6.75645e-111	0.767486	0.595	0.334	1.05259e-106	ciliary band	WHL22.727579	Sp-CycD	cyclin D (LOC373245), mRNA	SPU_007013	regulation of cyclin-dependent protein serine/threoninekinase activity; regulation of cell cycle; protein kinase binding; nucleus	Cyclin, N-terminal domain; Cyclin, C-terminal domain	CellCycle
2.77632e-110	0.797368	0.463	0.21	4.32524e-106	ciliary band	WHL22.661740	SPU_025942	radial spoke head 1 homolog (LOC585190), mRNA	SPU_025942	NA	MORN repeat	Unclassified
8.80887e-109	0.828392	0.313	0.114	1.37233e-104	ciliary band	WHL22.54311	Sp-Chaf1a	chromatin assembly factor 1 subunit A (LOC584359), transcript variant X1, mRNA	SPU_016101	NA	Chromatin assembly factor 1 subunit A; CAF1 complex subunit p150, region binding to CAF1-p60 at C-term; Chromatin assembly factor 1 complex p150 subunit, N-terminal	NA
1.41064e-105	0.541109	0.093	0.012	2.19763e-101	ciliary band	WHL22.626943	Sp-Galnac4s-6stL_4	carbohydrate sulfotransferase 15 (LOC100890246), mRNA	SPU_012468	sulfotransferase activity	Sulfotransferase domain; Sulfotransferase family	Transferase
2.46274e-103	0.311406	1	0.994	3.8367e-99	ciliary band	WHL22.472263	Sp-Rpl27	60S ribosomal protein L27 (LOC580957), mRNA	SPU_019788	translation; structural constituent of ribosome; intracellular; ribosome	Ribosomal L27e protein family; KOW motif	Translation_RibosomalProtein
5.0238e-100	0.353207	0.981	0.94	7.82658e-96	ciliary band	WHL22.445772	Sp-Rps7	40S ribosomal protein S7 (LOC584812), mRNA	SPU_021322	translation; structural constituent of ribosome; intracellular; ribosome	Ribosomal protein S7e	Translation_RibosomalProtein
6.26366e-100	0.336425	0.999	0.994	9.75815e-96	ciliary band	WHL22.440771	SPU_014881	NA	SPU_014881	NA	NA	NA
3.66199e-97	0.75931	0.311	0.118	5.70502e-93	ciliary band	WHL22.570082	Sp-Rbbp4	histone-binding protein RBBP4 (LOC579451), transcript variant X2, mRNA	SPU_026263	protein binding	Histone-binding protein RBBP4 or subunit C of CAF1 complex; WD domain, G-beta repeat	Unclassified
7.56299e-97	0.278402	0.995	0.987	1.17824e-92	ciliary band	WHL22.44721	Sp-Rps11	40S ribosomal protein S11 (LOC579026), mRNA	SPU_022682	translation; structural constituent of ribosome; intracellular; ribosome	Ribosomal protein S17; Ribosomal_S17 N-terminal	Translation_RibosomalProtein
2.59541e-92	0.623737	0.227	0.071	4.04339e-88	ciliary band	WHL22.303873	WHL22.303873	uncharacterized LOC100888720 (LOC100888720), transcript variant X1, mRNA	NA	NA	NA	NA
2.09113e-89	0.677193	0.479	0.253	3.25778e-85	ciliary band	WHL22.520943	Sp-Anp32bL	acidic leucine-rich nuclear phosphoprotein 32 family member B (LOC581523), transcript variant X1, mRNA	SPU_001511	protein binding	Leucine Rich repeats (2 copies); Leucine-rich repeat; Leucine rich repeat	Unclassified
2.48596e-89	0.430899	0.059	0.006	3.87288e-85	ciliary band	WHL22.555879	Sp-Clect/Fn3_7	uncharacterized LOC575010 (LOC575010), mRNA	SPU_023488	protein binding; carbohydrate binding	Lectin C-type domain; PAN domain; Fibronectin type III domain	Adhesion_IgFN3Receptor
5.91918e-89	0.728345	0.271	0.098	9.22149e-85	ciliary band	WHL22.119492	Sp-Slc34a2	sodium-dependent phosphate transport protein 2C (LOC576137), transcript variant X1, mRNA	SPU_003240	sodium-dependent phosphate transport; sodium-dependent phosphate transmembrane transporter activity; membrane	Na+/Pi-cotransporter	NA
5.1241e-88	0.581837	0.599	0.365	7.98283e-84	ciliary band	WHL22.587326	Sp-Set	protein SET (LOC583082), mRNA	SPU_001780	nucleosome assembly; nucleus	Nucleosome assembly protein (NAP)	Dehydrogenase
1.03067e-87	0.313909	0.995	0.978	1.60568e-83	ciliary band	WHL22.591708	SPU_005709	60S ribosomal protein L27a (LOC580148), mRNA	SPU_005709	translation; structural constituent of ribosome; intracellular; ribosome	Ribosomal proteins 50S-L15, 50S-L18e, 60S-L27A	Translation_RibosomalProtein
1.11756e-87	0.363185	0.057	0.005	1.74104e-83	ciliary band	WHL22.145698	Sp-Hypp_2157	NA	SPU_014556	NA	NA	NA
1.79468e-87	0.286789	0.988	0.974	2.79593e-83	ciliary band	WHL22.434736	SPU_012865	60S ribosomal protein L18 (LOC373246), mRNA	SPU_012865	translation; structural constituent of ribosome; intracellular; ribosome	Ribosomal protein 60S L18 and 50S L18e	Translation_RibosomalProtein
1.18998e-86	0.310563	0.994	0.988	1.85387e-82	ciliary band	WHL22.26714	Sp-Rpl41	uncharacterized LOC575035 (LOC575035), ncRNA	SPU_008296	translation; structural constituent of ribosome; ribosome	Ribosomal protein L41	Translation_RibosomalProtein
2.72173e-86	0.356782	0.992	0.982	4.24018e-82	ciliary band	WHL22.594978	WHL22.594978	40S ribosomal protein S26 (LOC576654), transcript variant X2, mRNA	NA	NA	NA	NA
4.41069e-86	0.714728	0.156	0.039	6.87142e-82	ciliary band	WHL22.746125	SPU_011000	cilia- and flagella-associated protein 20 (LOC592567), mRNA	SPU_011000	NA	Protein of unknown function (DUF667)	Homolog-of-gene-with-unknown-function
6.98204e-86	0.623755	0.687	0.474	1.08773e-81	ciliary band	WHL22.28747	SPU_009484	uncharacterized LOC100892995 (LOC100892995), mRNA	SPU_009484	NA	Domain of unknown function (DUF4541); FAM183A and FAM183B related	NA
1.02078e-83	0.645638	0.229	0.076	1.59028e-79	ciliary band	WHL22.544197	Sp-Slc34a2_1	sodium-dependent phosphate transport protein 2B (LOC576072), mRNA	SPU_017105	sodium-dependent phosphate transport; sodium-dependent phosphate transmembrane transporter activity; membrane	Na+/Pi-cotransporter	NA
1.86917e-83	0.769534	0.378	0.182	2.91199e-79	ciliary band	WHL22.291184	SPU_020750	parathymosin (LOC100890576), mRNA	SPU_020750	NA	PCNA-associated factor histone like domain	NA
6.21747e-83	0.353485	0.969	0.952	9.68619e-79	ciliary band	WHL22.765234	Sp-Rpl19	60S ribosomal protein L19 (LOC593861), mRNA	SPU_020627	translation; structural constituent of ribosome; intracellular; ribosome	Ribosomal protein L19e	Translation_RibosomalProtein
5.91468e-82	0.635272	0.674	0.468	9.21448e-78	ciliary band	WHL22.525784	SPU_002300; SPU_027414	meiosis expressed gene 1 protein homolog (LOC752118), mRNA	SPU_002300; SPU_027414	nucleus	Meiosis-expressed	NA
2.10069e-81	0.253821	0.991	0.961	3.27267e-77	ciliary band	WHL22.698400	Sp-Rpl26	60S ribosomal protein L26 (LOC585872), transcript variant X2, mRNA	SPU_005252	translation; structural constituent of ribosome; large ribosomal subunit	Ribosomal proteins L26 eukaryotic, L24P archaeal; KOW motif	Unclassified
2.33265e-81	0.395217	0.939	0.886	3.63404e-77	ciliary band	WHL22.278604	Sp-Rps10	40S ribosomal protein S10 (LOC580462), mRNA	SPU_014800	NA	Plectin/S10 domain	Unclassified
1.98586e-80	0.690763	0.118	0.025	3.09377e-76	ciliary band	WHL22.123675	SPU_018910	receptor for egg jelly protein (REJ9), mRNA	SPU_018910	neuropeptide signaling pathway; protein binding; membrane	REJ domain; Ankyrin repeats (many copies); Ankyrin repeats (3 copies)	NA
1.36509e-79	0.36309	0.956	0.94	2.12668e-75	ciliary band	WHL22.733909	Sp-Rpl36a	60S ribosomal protein L44 (LOC592965), mRNA	SPU_015294	translation; structural constituent of ribosome; intracellular; ribosome	Ribosomal protein L44	Translation_RibosomalProtein
5.45185e-79	0.711478	0.252	0.094	8.49344e-75	ciliary band	WHL22.766526	SPU_021667; Sp-Atub10; Sp-Atub2; SPU_026444	tubulin alpha-1C chain-like (LOC762594), transcript variant X2, mRNA	SPU_021667; SPU_021668; SPU_021669; SPU_026444	microtubule-based process; structural constituent of cytoskeleton; GTP binding; microtubule	Tubulin/FtsZ family, GTPase domain	NA
1.34507e-77	0.632952	0.17	0.049	2.09549e-73	ciliary band	WHL22.563188	Sp-Tyms_4; Sp-Tyms_2	thymidylate synthase (LOC762796), mRNA	SPU_000349; SPU_019780	dTMP biosynthetic process; thymidylate synthase activity	Thymidylate synthase	Ligase
9.23384e-77	0.425163	0.89	0.808	1.43854e-72	ciliary band	WHL22.35646	Sp-Rps23	40S ribosomal protein S23 (LOC590530), partial mRNA	SPU_026541	translation; structural constituent of ribosome; intracellular; ribosome; small ribosomal subunit	Ribosomal protein S12/S23	Translation_RibosomalProtein
2.0152e-76	0.455318	0.071	0.01	3.13948e-72	ciliary band	WHL22.731456	Sp-Hypp_9	latrophilin-3 (LOC579094), mRNA	SPU_005892	cell surface receptor signaling pathway; G-protein coupled receptor signaling pathway; neuropeptide signaling pathway; transmembrane signaling receptor activity; G-protein coupled receptor activity; zinc ion binding; membrane; integral component of membrane	7 transmembrane receptor (Secretin family); LIM domain; GPCR proteolysis site, GPS, motif	Adhesion_GPCR
1.06425e-75	0.484771	0.791	0.676	1.65799e-71	ciliary band	WHL22.667356	SPU_001314; Sp-Rpl5	60S ribosomal protein L5 (LOC752626), mRNA	SPU_001314; SPU_013432	translation; structural constituent of ribosome; 5S rRNA binding; intracellular; ribosome	Ribosomal large subunit proteins 60S L5, and 50S L18	Translation_RibosomalProtein
2.94645e-75	0.677375	0.267	0.106	4.59028e-71	ciliary band	WHL22.150420	Sp-Baz1b; Sp-Balz1b; Sp-Baz1bL	tyrosine-protein kinase BAZ1B (LOC585100), partial mRNA	SPU_003686; SPU_013195; SPU_020771	protein binding; zinc ion binding	Bromodomain; PHD-finger	NA
4.48148e-75	0.439141	0.85	0.739	6.98169e-71	ciliary band	WHL22.224201	Sp-Rpl7a	60S ribosomal protein L7a (LOC574574), partial mRNA	SPU_011075	ribosome biogenesis; ribonucleoprotein complex	Ribosomal protein L7Ae/L30e/S12e/Gadd45 family	Translation_RibosomalProtein
2.89162e-74	0.337561	0.983	0.969	4.50485e-70	ciliary band	WHL22.698804	Sp-Rps27	40S ribosomal protein S27-like (LOC578794), transcript variant X2, mRNA	SPU_006034	translation; structural constituent of ribosome; intracellular; ribosome	Ribosomal protein S27	Translation_RibosomalProtein
5.49886e-74	0.75653	0.234	0.089	8.56668e-70	ciliary band	WHL22.561381	Sp-Nat11	N-alpha-acetyltransferase 40 (LOC577667), mRNA	SPU_006679	N-acetyltransferase activity	Acetyltransferase (GNAT) family; Cysteine-rich secretory protein family; Acetyltransferase (GNAT) domain	NA
1.56157e-73	0.508848	0.101	0.021	2.43276e-69	ciliary band	WHL22.553750	Sp-Hypp_2706	uncharacterized LOC583352 (LOC583352), mRNA	SPU_024057	protein binding	Ankyrin repeats (3 copies); Ankyrin repeats (many copies); Ankyrin repeats (many copies)	Histone_Methyltransferase
1.67257e-73	0.636676	0.354	0.169	2.6057e-69	ciliary band	WHL22.717117	Sp-Clspn2	nucleolin 2-like (LOC105437539), mRNA	SPU_006674	NA	NA	NA
3.04835e-73	0.463662	0.824	0.713	4.74902e-69	ciliary band	WHL22.60737	Sp-Rpl4	60S ribosomal protein L4 (LOC578192), mRNA	SPU_015666	translation; structural constituent of ribosome; ribosome	Ribosomal protein L4/L1 family; 60S ribosomal protein L4 C-terminal domain	Translation_RibosomalProtein
3.1365e-73	0.43153	0.879	0.805	4.88635e-69	ciliary band	WHL22.506110	SPU_011703	cullin-associated NEDD8-dissociated protein 1 (LOC586413), transcript variant X1, mRNA	SPU_011703	translational elongation; structural constituent of ribosome; binding; intracellular; ribosome	TATA-binding protein interacting (TIP20); 60s Acidic ribosomal protein	Translation_RibosomalProtein
8.24624e-73	0.273256	0.989	0.974	1.28468e-68	ciliary band	WHL22.51569	Sp-Rpl7	60S ribosomal protein L7 (LOC755731), partial mRNA	SPU_010916	NA	NA	NA
1.55059e-72	0.618027	0.179	0.056	2.41566e-68	ciliary band	WHL22.119629	Sp-Idh2; SPU_018401	isocitrate dehydrogenase [NADP], mitochondrial (LOC580429), transcript variant X1, mRNA	SPU_005201; SPU_018401	isocitrate metabolic process; oxidation-reduction process; magnesium ion binding; isocitrate dehydrogenase (NADP+) activity; oxidoreductase activity; acting on the CH-OH group ofdonors; NAD or NADP as acceptor; NAD binding	Isocitrate/isopropylmalate dehydrogenase	Metabolism_Energy
7.40852e-70	0.478058	0.087	0.016	1.15417e-65	ciliary band	WHL22.280941	WHL22.280941	transcription initiation factor TFIID subunit 11-like (LOC100891101), mRNA	NA	NA	NA	NA
7.96327e-70	0.434106	0.064	0.009	1.2406e-65	ciliary band	WHL22.516940	Sp-St14L_4	enteropeptidase (LOC584950), transcript variant X1, mRNA	SPU_025128	proteolysis; catalytic activity; serine-type endopeptidase activity; protein binding	Trypsin; Fz domain; CUB domain	Metabolism_AminoAcid
4.30356e-69	0.357691	0.919	0.862	6.70452e-65	ciliary band	WHL22.435146	Sp-Rps6	40S ribosomal protein S6 (LOC577989), mRNA	SPU_008211	translation; structural constituent of ribosome; intracellular; ribosome	Ribosomal protein S6e	Translation_RibosomalProtein
6.60433e-69	0.30606	0.959	0.903	1.02889e-64	ciliary band	WHL22.413118	Sp-Rps18; Sp-Rps18_1	40S ribosomal protein S18 (LOC590220), mRNA	SPU_006459; SPU_011152	translation; nucleic acid binding; RNA binding; structural constituent of ribosome; intracellular; ribosome	Ribosomal protein S13/S18	Translation_RibosomalProtein
1.07326e-68	0.527793	0.33	0.149	1.67204e-64	ciliary band	WHL22.620148	Sp-AnL2; Sp-AnL3; Sp-AnL4; Sp-MeprinAaL	protein SpAN (LOC593467), transcript variant X2, misc_RNA	SPU_004115; SPU_004116; SPU_004117; SPU_030013	proteolysis; metalloendopeptidase activity; metallopeptidase activity; zinc ion binding	Astacin (Peptidase family M12A); CUB domain	Metalloprotease
5.98536e-68	0.68457	0.312	0.144	9.32459e-64	ciliary band	WHL22.131608	Sp-Hypp_1772	myb-like protein X (LOC577952), mRNA	SPU_008203	regulation of microtubule polymerization or depolymerization	Stathmin family	NA
7.58748e-66	0.288879	0.963	0.901	1.18205e-61	ciliary band	WHL22.517885	SPU_020487	60S ribosomal protein L12 (LOC579559), mRNA	SPU_020487	translation; structural constituent of ribosome; ribosome	Ribosomal protein L11, RNA binding domain	Translation_RibosomalProtein
1.57798e-65	0.487695	0.713	0.558	2.45834e-61	ciliary band	WHL22.401792	SPU_011015	34/67 kD laminin binding protein (LOC373183), mRNA	SPU_011015	translation; structural constituent of ribosome; small ribosomal subunit	40S ribosomal protein SA C-terminus	Translation_RibosomalProtein
1.98517e-64	0.412161	0.822	0.697	3.0927e-60	ciliary band	WHL22.313858	SPU_007709; Sp-Rps5	40S ribosomal protein S5 (LOC592668), mRNA	SPU_007709; SPU_022957	translation	Ribosomal protein S7p/S5e	Translation_RibosomalProtein
4.93412e-64	0.572263	0.443	0.252	7.68686e-60	ciliary band	WHL22.446899	Sp-Ran	GTP-binding nuclear protein Ran (LOC581649), transcript variant X2, mRNA	SPU_023217	GTP catabolic process; intracellular protein transport; nucleocytoplasmic transport; signal transduction; small GTPase mediated signal transduction; protein transport; GTPase activity; GTP binding; intracellular; membrane	Ras family; Ras of Complex, Roc, domain of DAPkinase; ADP-ribosylation factor family	GTPase_Ras_Ran
7.79289e-64	0.273834	0.959	0.9	1.21405e-59	ciliary band	WHL22.595201	Sp-Rps13	40S ribosomal protein S13 (LOC581196), mRNA	SPU_022161	translation; structural constituent of ribosome; intracellular; ribosome	Ribosomal S13/S15 N-terminal domain; Ribosomal protein S15	Translation_RibosomalProtein
1.30536e-62	0.620719	0.163	0.052	2.03362e-58	ciliary band	WHL22.328830	Sp-Slsp_27	cuticle-degrading serine protease (LOC577978), mRNA	SPU_028935	proteolysis; serine-type endopeptidase activity	Subtilase family; Peptidase inhibitor I9	Metabolism_PeptidaseInhibitor
4.61521e-62	0.477453	0.727	0.575	7.19003e-58	ciliary band	WHL22.307920	Sp-Rpl15	uncharacterized LOC105446722 (LOC105446722), ncRNA	SPU_028104	translation; structural constituent of ribosome; intracellular; ribosome	Ribosomal L15	Translation_RibosomalProtein
4.75585e-62	0.586718	0.37	0.193	7.40913e-58	ciliary band	WHL22.520085	SPU_005442	radial spoke head protein 9 homolog (LOC574753), mRNA	SPU_005442	NA	Radial spokehead-like protein	NA
5.70306e-61	0.557466	0.233	0.093	8.8848e-57	ciliary band	WHL22.244973	SPU_019907; Sp-Cct4	T-complex protein 1 subunit delta (LOC579722), mRNA	SPU_019907; SPU_028735	NA	NA	NA
6.40251e-61	0.32806	0.918	0.856	9.97448e-57	ciliary band	WHL22.632383	SPU_006570	60S ribosomal protein L10 (LOC752328), mRNA	SPU_006570	NA	NA	NA
6.44083e-61	0.524814	0.111	0.028	1.00342e-56	ciliary band	WHL22.60302	Sp-Clect_56	alpha-N-acetylgalactosamine-specific lectin (LOC586512), transcript variant X1, mRNA	SPU_028432	carbohydrate binding	Lectin C-type domain	ImmuneSystem_Receptor_CLectin
8.85439e-61	0.643145	0.255	0.111	1.37943e-56	ciliary band	WHL22.483879	SPU_015692	testis, prostate and placenta-expressed protein (LOC577525), mRNA	SPU_015692	NA	NA	NA
2.13833e-60	0.65933	0.249	0.107	3.33131e-56	ciliary band	WHL22.245050	SPU_010970	uncharacterized LOC576204 (LOC576204), transcript variant X3, mRNA	SPU_010970	NA	NA	NA
3.19453e-60	0.295581	0.936	0.897	4.97676e-56	ciliary band	WHL22.368884	Sp-Slc25a4	ADP/ATP translocase 3 (LOC575225), mRNA	SPU_014660	transport; transmembrane transport; transporter activity; mitochondrial inner membrane	Mitochondrial carrier protein	Metabolism_Energy
7.68117e-60	0.357351	0.939	0.894	1.19665e-55	ciliary band	WHL22.139213	Sp-Ef1a; Sp-Ef1a(Cter)	elongation factor 1 alpha (LOC548620), transcript variant X1, mRNA	SPU_000595; SPU_002050	translational elongation; translation elongation factor activity; GTPase activity; GTP binding; cytoplasm	Elongation factor Tu GTP binding domain; Elongation factor Tu C-terminal domain; Elongation factor Tu domain 2	GTPase_Translational_Elongation
9.29797e-60	0.366746	0.905	0.858	1.44853e-55	ciliary band	WHL22.442792	Sp-Rps2_1; Sp-Rps2	40S ribosomal protein S2 (LOC576368), mRNA	SPU_005825; SPU_010936	translation; RNA binding; structural constituent of ribosome; ribosome; small ribosomal subunit	Ribosomal protein S5, N-terminal domain; Ribosomal protein S5, C-terminal domain	Translation_RibosomalProtein
1.26192e-59	0.673002	0.393	0.216	1.96594e-55	ciliary band	WHL22.167437	Sp-Tektin2	tektin B1 (LOC373482), mRNA	SPU_020728	microtubule cytoskeleton organization; microtubule	Tektin family	Cytoskeleton_MicrotubuleAssociated
1.69114e-59	0.538473	0.427	0.238	2.63462e-55	ciliary band	WHL22.212125	Sp-SnrpB; Sp-SnrpB_1	small nuclear ribonucleoprotein-associated protein B' (LOC581143), transcript variant X1, mRNA	SPU_013007; SPU_017802	NA	LSM domain	Unclassified
2.80873e-59	0.569377	0.499	0.318	4.37571e-55	ciliary band	WHL22.442624	Sp-HH2az; Sp-Unk_41	histone H2 A.F/Z (H2A.F/Z), mRNA	SPU_024890; SPU_026501	NA	Core histone H2A/H2B/H3/H4; C-terminus of histone H2A	Histone_Variant
3.11054e-59	0.495118	0.088	0.019	4.84591e-55	ciliary band	WHL22.481618	SPU_008357	collagen triple helix repeat-containing protein 1 (LOC756019), transcript variant X1, mRNA	SPU_008357	NA	NA	NA
8.14294e-58	0.417965	0.825	0.716	1.26859e-53	ciliary band	WHL22.398255	Sp-Rps4	40S ribosomal protein S4 (LOC755970), mRNA	SPU_022607	translation; RNA binding; structural constituent of ribosome; intracellular; ribosome	40S ribosomal protein S4 C-terminus; RS4NT (NUC023) domain; Ribosomal family S4e	NucleicAcid_Binding
2.51797e-57	0.675031	0.455	0.284	3.92275e-53	ciliary band	WHL22.129947	SPU_012151	protein Flattop homolog (LOC574962), mRNA	SPU_012151	NA	NA	NA
2.61612e-57	0.287122	0.926	0.859	4.07565e-53	ciliary band	WHL22.665657	Sp-Rpl18a	acyl-CoA dehydrogenase family member 9, mitochondrial (LOC753939), mRNA	SPU_023692	translation; structural constituent of ribosome; ribosome	Ribosomal proteins 50S-L18Ae/60S-L20/60S-L18A	Translation_RibosomalProtein
1.2343e-56	0.36314	0.833	0.723	1.92291e-52	ciliary band	WHL22.173213	Sp-Rps3	40S ribosomal protein S3 (LOC593744), mRNA	SPU_013662	translation; RNA binding; structural constituent of ribosome; intracellular; ribosome; small ribosomal subunit	Ribosomal protein S3, C-terminal domain; KH domain	Translation_RibosomalProtein
1.6117e-56	0.368111	0.867	0.796	2.51087e-52	ciliary band	WHL22.701048	Sp-Ubq/RL40fp	ubiquitin (LOC584839), transcript variant X1, mRNA	SPU_015276	translation; structural constituent of ribosome; protein binding; ribosome	Ubiquitin family; Ribosomal L40e family; Ubiquitin-2 like Rad60 SUMO-like	Translation_RibosomalProtein
1.99604e-56	0.322574	0.046	0.006	3.10963e-52	ciliary band	WHL22.400962	Sp-Fut4_3	glycoprotein 3-alpha-L-fucosyltransferase A-like (LOC578793), mRNA	SPU_023237	protein glycosylation; fucosyltransferase activity; membrane	Glycosyltransferase family 10 (fucosyltransferase) C-term; Fucosyltransferase, N-terminal	Transferase
2.2215e-56	0.487015	0.529	0.343	3.46088e-52	ciliary band	WHL22.325309	SPU_026491	uncharacterized LOC578532 (LOC578532), mRNA	SPU_026491	NA	Dpy-30 motif	Unclassified
3.762e-56	0.707574	0.261	0.121	5.86083e-52	ciliary band	WHL22.226225	SPU_017010; Sp-Dnamth	DNA (cytosine-5)-methyltransferase PliMCI (LOC574665), transcript variant X1, mRNA	SPU_017010; SPU_023599	DNA methylation; DNA binding; methyltransferase activity	C-5 cytosine-specific DNA methylase	NucleicAcid_Modification
5.53742e-56	0.426921	0.064	0.011	8.62675e-52	ciliary band	WHL22.381523	SPU_008248	degenerin-like protein unc-105 (LOC762650), mRNA	SPU_008248	sodium ion transport; sodium channel activity; membrane	Amiloride-sensitive sodium channel	Transferase
1.82743e-55	0.536382	0.251	0.107	2.84695e-51	ciliary band	WHL22.765203	Sp-Slc44a2	choline transporter-like protein 2 (LOC593044), mRNA	SPU_003329	binding	Plasma-membrane choline transporter	Metabolism_Lipid
2.2344e-55	0.628427	0.261	0.121	3.48097e-51	ciliary band	WHL22.167485	SPU_026143	UPF0573 protein C2orf70 homolog A (LOC574667), mRNA	SPU_026143	NA	Protein of unknown function (DUF2475)	Homolog-of-gene-with-unknown-function
4.52477e-55	0.603974	0.238	0.104	7.04914e-51	ciliary band	WHL22.99630	SPU_002646; SPU_002647	putative uncharacterized protein DDB_G0287113 (LOC100890394), transcript variant X1, mRNA	SPU_002646; SPU_002647	NA	NA	NA
3.25958e-54	0.523907	0.59	0.41	5.0781e-50	ciliary band	WHL22.235339	Sp-Hes	transcription factor HES-4 (LOC592057), mRNA	SPU_021608	regulation of transcription; DNA-templated; DNA binding; protein dimerization activity	Helix-loop-helix DNA-binding domain; Hairy Orange	Nervous_TF
5.72907e-54	0.360026	0.89	0.83	8.92531e-50	ciliary band	WHL22.531852	WHL22.531852	40S ribosomal protein S3a (LOC578151), mRNA	NA	NA	NA	NA
7.7175e-54	0.548824	0.42	0.25	1.20231e-49	ciliary band	WHL22.198142	SPU_026768	EF-hand calcium-binding domain-containing protein 10 (LOC588143), mRNA	SPU_026768	calcium ion binding	Family of unknown function (DUF5582)	Unclassified
1.39702e-52	0.367923	0.054	0.009	2.17641e-48	ciliary band	WHL22.597753	Sp-Hypp_1236	sarcoplasmic reticulum histidine-rich calcium-binding protein (LOC752241), mRNA	SPU_028727	NA	NA	NA
2.19193e-52	0.443602	0.687	0.507	3.4148e-48	ciliary band	WHL22.666070	SPU_016005	60S ribosomal protein L10a (LOC586056), mRNA	SPU_016005	RNA binding	Ribosomal protein L1p/L10e family	Translation_RibosomalProtein
2.89835e-52	0.482546	0.149	0.051	4.51535e-48	ciliary band	WHL22.505726	Sp-Atad2	ATPase family AAA domain-containing protein 2 (LOC585573), mRNA	SPU_001508	nucleotide binding; protein binding; ATP binding; nucleoside-triphosphatase activity	ATPase family associated with various cellular activities (AAA); Bromodomain; AAA+ lid domain	NA
9.16486e-52	0.470723	0.531	0.35	1.42779e-47	ciliary band	WHL22.368559	SPU_018575; Sp-Gatad1; SPU_018577; Sp-Traf3ip1	GATA zinc finger domain-containing protein 1-like (LOC591657), mRNA	SPU_018575; SPU_018576; SPU_018577; SPU_019927	microtubule binding	Microtubule-binding protein MIP-T3 C-terminal region	NA
7.85475e-51	0.564441	0.296	0.148	1.22369e-46	ciliary band	WHL22.623086	SPU_008114	uncharacterized LOC577313 (LOC577313), mRNA	SPU_008114	NA	NA	NA
2.42232e-50	0.55961	0.443	0.275	3.77373e-46	ciliary band	WHL22.475623	SPU_019734	uncharacterized protein C9orf171 homolog (LOC574620), mRNA	SPU_019734	NA	Domain of unknown function (DUF4483)	NA
5.66401e-50	0.525047	0.253	0.116	8.82396e-46	ciliary band	WHL22.479402	Sp-Cct3	T-complex protein 1 subunit gamma (LOC574601), mRNA	SPU_009300	protein folding; cellular protein metabolic process; ATP binding; unfolded protein binding	TCP-1/cpn60 chaperonin family	Chaperone
8.53243e-50	0.278915	0.922	0.841	1.32927e-45	ciliary band	WHL22.580191	Sp-Rps9_1; Sp-Rps9	40S ribosomal protein S9 (LOC586110), mRNA	SPU_006605; SPU_008394	translation; structural constituent of ribosome; rRNA binding; intracellular; small ribosomal subunit	Ribosomal protein S4/S9 N-terminal domain	Translation_RibosomalProtein
4.21388e-49	0.343535	0.816	0.724	6.56481e-45	ciliary band	WHL22.420841	Sp-Rpl28	60S ribosomal protein L28-like (LOC105444261), mRNA	SPU_028155	translation; structural constituent of ribosome; intracellular; ribosome	Ribosomal L28e protein family	Translation_RibosomalProtein
1.04947e-48	0.425392	0.638	0.459	1.63498e-44	ciliary band	WHL22.198933	Sp-Rpl8; Sp-Rpl8_1	60S ribosomal protein L8 (LOC591341), mRNA	SPU_010692; SPU_026671	translation; structural constituent of ribosome; intracellular; ribosome	Ribosomal Proteins L2, C-terminal domain; Ribosomal Proteins L2, RNA binding domain	Translation_RibosomalProtein
1.6759e-48	0.624641	0.281	0.143	2.61088e-44	ciliary band	WHL22.454782	Sp-Hsp40A	dnaJ homolog subfamily B member 13 (LOC593917), mRNA	SPU_016562	protein folding; unfolded protein binding	DnaJ C terminal domain; DnaJ domain	Defensome_HSP
2.31322e-48	0.515441	0.133	0.045	3.60376e-44	ciliary band	WHL22.4052	SPU_017815	uncharacterized protein C2orf61 homolog (LOC575504), transcript variant X2, mRNA	SPU_017815	NA	NA	NA
2.74063e-48	0.43997	0.103	0.029	4.26962e-44	ciliary band	WHL22.478695	SPU_024009; Sp-C1qL_9	complement C1q tumor necrosis factor-related protein 4 (LOC588178), transcript variant X2, mRNA	SPU_024009; SPU_024010	NA	NA	NA
3.06625e-48	0.376665	0.056	0.01	4.77691e-44	ciliary band	WHL22.515276	Sp-Hypp_1421	UDP-D-xylose:L-fucose alpha-1,3-D-xylosyltransferase MGP4 (LOC100893515), mRNA	SPU_002934	oxidation-reduction process; iron ion binding; oxidoreductase activity; acting on paired donors; withincorporation or reduction of molecular oxygen; heme binding	Nucleotide-diphospho-sugar transferase; Cytochrome P450	ElectronTransfer_Cytochrome
3.81687e-48	0.520176	0.138	0.048	5.94631e-44	ciliary band	WHL22.680872	Sp-Hypp_293; Sp-Hypp_353; Sp-Hypp_740; SPU_015028; Sp-Hypp_2471	interaptin (LOC588428), mRNA	SPU_000094; SPU_002336; SPU_014171; SPU_015028; SPU_019901	NA	NA	NA
3.90508e-48	0.335437	0.061	0.011	6.08372e-44	ciliary band	WHL22.366251	WHL22.366251	caldesmon (LOC100889898), mRNA	NA	NA	NA	NA
1.62041e-47	0.496159	0.283	0.141	2.52443e-43	ciliary band	WHL22.282650	SPU_001153	MORN repeat-containing protein 5 (LOC586835), mRNA	SPU_001153	NA	MORN repeat	Unclassified
1.47157e-46	0.509952	0.394	0.236	2.29255e-42	ciliary band	WHL22.3439	Sp-SnrpF	small nuclear ribonucleoprotein F (LOC592177), mRNA	SPU_019580	RNA processing; nucleus	LSM domain	Unclassified
1.21973e-45	0.507637	0.228	0.103	1.90022e-41	ciliary band	WHL22.479718	Sp-Spag6	sperm-associated antigen 6 (LOC589479), mRNA	SPU_025787	binding; protein binding	Armadillo/beta-catenin-like repeat; HEAT repeats; non-SMC mitotic condensation complex subunit 1	Unclassified
1.75042e-45	0.463686	0.197	0.083	2.72697e-41	ciliary band	WHL22.507537	Sp-Tcp1_2; Sp-Tcp1_1	T-complex protein 1 subunit alpha (LOC582138), mRNA	SPU_022269; SPU_022270	protein folding; cellular protein metabolic process; ATP binding; unfolded protein binding	TCP-1/cpn60 chaperonin family	Chaperone
1.8491e-45	0.452839	0.111	0.034	2.88072e-41	ciliary band	WHL22.654373	Sp-Shmt2_1	serine hydroxymethyltransferase-like (LOC593509), transcript variant X1, mRNA	SPU_022066	glycine metabolic process; L-serine metabolic process; catalytic activity; glycine hydroxymethyltransferase activity; pyridoxal phosphate binding	Serine hydroxymethyltransferase	Metabolism_AminoAcid
2.58036e-44	0.536	0.226	0.106	4.01995e-40	ciliary band	WHL22.721863	Sp-PolE3	DNA polymerase epsilon subunit 3 (LOC580013), mRNA	SPU_015550	sequence-specific DNA binding; protein heterodimerization activity; intracellular	Histone-like transcription factor (CBF/NF-Y) and archaeal histone; Condensin II complex subunit CAP-H2 or CNDH2, C-term	Transcription_Regulation
2.72184e-44	0.527324	0.517	0.356	4.24035e-40	ciliary band	WHL22.688668	Sp-rsp3h	radial spoke head protein 3 homolog (LOC578469), transcript variant X1, mRNA	SPU_012045	NA	Radial spoke protein 3	Cytoskeleton_RadialSpoke
1.73686e-43	0.446023	0.196	0.084	2.70586e-39	ciliary band	WHL22.29255	Sp-Cct8; Sp-Cct8_1	T-complex protein 1 subunit theta (LOC583086), mRNA	SPU_006047; SPU_015592	protein folding; cellular protein metabolic process; ATP binding; unfolded protein binding	TCP-1/cpn60 chaperonin family	Chaperone
3.23419e-43	0.286027	0.044	0.007	5.03854e-39	ciliary band	WHL22.655501	Sp-Hypp_2391	uncharacterized LOC100893657 (LOC100893657), mRNA	SPU_018562	NA	Methyltransferase FkbM domain	NA
5.97234e-43	0.388836	0.148	0.054	9.3043e-39	ciliary band	WHL22.453635	Sp-Cdk6; Sp-Cdk4	cyclin-dependent kinase 4 (cdk4), mRNA	SPU_000151; SPU_010284	protein phosphorylation; protein kinase activity; protein serine/threonine kinase activity; ATP binding; transferase activity; transferring phosphorus-containing groups	Protein kinase domain; Protein tyrosine kinase	CellCycle
6.77317e-43	0.532866	0.293	0.154	1.05519e-38	ciliary band	WHL22.684591	Sp-Tektin3	tektin-3 (LOC586326), mRNA	SPU_023618	microtubule cytoskeleton organization; microtubule	Tektin family	Cytoskeleton_MicrotubuleAssociated
2.0516e-42	0.356798	0.049	0.008	3.19619e-38	ciliary band	WHL22.312901	Sp-Tsp1k	uncharacterized LOC756169 (LOC756169), mRNA	SPU_006004	protein phosphorylation; protein kinase activity; ATP binding; transferase activity; transferring phosphorus-containing groups	Protein tyrosine kinase; Thrombospondin type 1 domain; Protein kinase domain	Kinase_TK
2.35175e-42	0.300632	0.049	0.009	3.6638e-38	ciliary band	WHL22.374695	Sp-Hypp_3093	histone acetyltransferase KAT6A-like (LOC581793), mRNA	SPU_003720	NA	NA	NA
5.88589e-42	0.494622	0.346	0.199	9.16963e-38	ciliary band	WHL22.733457	Sp-Oda/LC7L1	NA	SPU_008699	NA	Roadblock/LC7 domain	Cytoskeleton_Dynein
2.04291e-41	0.478222	0.169	0.07	3.18265e-37	ciliary band	WHL22.536654	Sp-Slc7a8; Sp-Lec7a6_9; Sp-Slc7a6_8	Y+L amino acid transporter 2 (LOC585434), transcript variant X1, mRNA	SPU_002429; SPU_009252; SPU_023311	amino acid transmembrane transport; amino acid transmembrane transporter activity; membrane	Amino acid permease; Amino acid permease	Metabolism_AminoAcid
2.37406e-41	0.484136	0.128	0.047	3.69856e-37	ciliary band	WHL22.767030	Sp-DlcL2	tctex1 domain-containing protein 1 pseudogene (LOC586757), misc_RNA	SPU_004498	NA	Tctex-1 family	NA
4.6721e-41	0.336589	0.061	0.013	7.27866e-37	ciliary band	WHL22.311249	SPU_024909	uncharacterized LOC105443533 (LOC105443533), ncRNA	SPU_024909	sulfotransferase activity	Sulfotransferase domain; Sulfotransferase family	NA
6.97795e-41	0.485798	0.265	0.137	1.0871e-36	ciliary band	WHL22.737636	Sp-Cct5	T-complex protein 1 subunit epsilon (LOC575808), mRNA	SPU_025484	protein folding; cellular protein metabolic process; ATP binding; unfolded protein binding	TCP-1/cpn60 chaperonin family	Chaperone
8.18193e-41	0.356777	0.66	0.503	1.27466e-36	ciliary band	WHL22.655368	Sp-Rps19	40S ribosomal protein S19 (LOC578158), mRNA	SPU_006487	translation; structural constituent of ribosome; intracellular; ribosome	Ribosomal protein S19e	Translation_RibosomalProtein
8.44727e-41	0.515392	0.143	0.055	1.316e-36	ciliary band	WHL22.535609	Sp-PaxC	paired box protein Pax-9 (LOC583610), mRNA	SPU_000276	regulation of transcription; DNA-templated; DNA binding	'Paired box' domain	TranscriptionFactor_Homeo
1.26402e-40	0.553815	0.204	0.095	1.96922e-36	ciliary band	WHL22.761126	Sp-C4orf47	UPF0602 protein C4orf47 homolog (LOC591073), mRNA	SPU_018018	NA	Domain of unknown function (DUF4586)	NA
2.6081e-40	0.359064	0.081	0.022	4.06316e-36	ciliary band	WHL22.615298	Sp-Scn5a	sodium channel protein type 4 subunit alpha B (LOC588616), mRNA	SPU_025997	ion transport; sodium ion transport; transmembrane transport; ion channel activity; voltage-gated sodium channel activity; voltage-gated sodium channel complex; membrane	Ion transport protein; Polycystin cation channel	Fertilization
2.6084e-40	0.356292	0.072	0.018	4.06362e-36	ciliary band	WHL22.554315	SPU_027783	kinesin-like protein KIF28P (LOC580798), mRNA	SPU_027783	protein folding; unfolded protein binding; prefoldin complex	Prefoldin subunit	Chaperone
8.01961e-40	0.384681	0.106	0.034	1.24937e-35	ciliary band	WHL22.145815	Sp-Srcr96	deleted in malignant brain tumors 1 protein (LOC591663), mRNA	SPU_010992	scavenger receptor activity; membrane	Scavenger receptor cysteine-rich domain; Scavenger receptor cysteine-rich domain	ImmuneSystem_Receptor_SRCR
2.18363e-39	0.544048	0.251	0.13	3.40187e-35	ciliary band	WHL22.374764	SPU_004558	uncharacterized LOC100892829 (LOC100892829), mRNA	SPU_004558	NA	Domain of unknown function (DUF4542)	NA
3.13553e-39	0.466767	0.339	0.197	4.88485e-35	ciliary band	WHL22.657695	SPU_002584; Sp-Pf2L1; SPU_006235	growth arrest-specific protein 8 (LOC576676), mRNA	SPU_002584; SPU_003865; SPU_006235	NA	NA	NA
4.08654e-39	0.432227	0.104	0.034	6.36643e-35	ciliary band	WHL22.249044	Sp-Mcm5	DNA replication licensing factor mcm5 (LOC578688), mRNA	SPU_012431	DNA replication; DNA replication initiation; DNA binding; DNA helicase activity; ATP binding; nucleus; MCM complex	MCM P-loop domain; MCM OB domain; MCM AAA-lid domain	DNA_Replication
6.68063e-39	0.338272	0.069	0.017	1.04078e-34	ciliary band	WHL22.737599	SPU_019176	uncharacterized LOC576238 (LOC576238), transcript variant X2, mRNA	SPU_019176	signal transduction; protein binding	Death domain	NA
8.2126e-39	0.465497	0.164	0.069	1.27944e-34	ciliary band	WHL22.313595	Sp-Rpa3	replication protein A 14 kDa subunit (LOC576263), mRNA	SPU_019078	NA	Replication factor A protein 3	DNA_Replication
8.28531e-39	0.277886	0.046	0.008	1.29077e-34	ciliary band	WHL22.343311	WHL22.343311	uncharacterized LOC100891885 (LOC100891885), mRNA	NA	NA	NA	NA
1.25845e-38	0.45678	0.048	0.009	1.96055e-34	ciliary band	WHL22.717674	Sp-Hypp_2760	ankyrin-containing gene specific for apical tuft-1 (AnkAT-1), mRNA	SPU_024961	protein binding	Ankyrin repeats (3 copies); Ankyrin repeat; Ankyrin repeat	Unclassified
2.54537e-38	0.500195	0.238	0.121	3.96544e-34	ciliary band	WHL22.538298	Sp-Nme5; Sp-Nme5_1	nucleoside diphosphate kinase homolog 5 (LOC585473), mRNA	SPU_012521; SPU_024225	nucleoside diphosphate phosphorylation; GTP biosynthetic process; UTP biosynthetic process; CTP biosynthetic process; nucleoside diphosphate kinase activity; ATP binding	Nucleoside diphosphate kinase; Dpy-30 motif	NA
3.26155e-38	0.353741	0.067	0.017	5.08116e-34	ciliary band	WHL22.717588	Sp-Z166; Sp-Rxr	zinc finger protein 764-like (LOC589099), mRNA	SPU_012645; SPU_028422	nucleic acid binding; metal ion binding	Zinc-finger double domain; Zinc finger, C2H2 type; C2H2-type zinc finger	Nervous_Retinal
4.6012e-38	0.460646	0.194	0.089	7.16821e-34	ciliary band	WHL22.34772	Sp-Hypp_2348	uncharacterized LOC580068 (LOC580068), transcript variant X1, mRNA	SPU_017631	NA	Sperm acrosome-associated protein 9	NA
8.85583e-38	0.335161	0.061	0.014	1.37965e-33	ciliary band	WHL22.82039	WHL22.82039	uncharacterized LOC100893430 (LOC100893430), transcript variant X1, mRNA	NA	NA	NA	NA
1.27752e-37	0.49702	0.225	0.112	1.99025e-33	ciliary band	WHL22.565073	Sp-Baz1a	bromodomain adjacent to zinc finger domain protein 1A (LOC577837), transcript variant X3, mRNA	SPU_006840	protein binding; zinc ion binding	ATP-utilising chromatin assembly and remodelling N-terminal; PHD-finger; Bromodomain	NA
1.37494e-37	0.404474	0.515	0.363	2.14202e-33	ciliary band	WHL22.437266	Sp-RshL3	radial spokehead (LOC373423), mRNA	SPU_014801	NA	Radial spokehead-like protein	Cytoskeleton_RadialSpoke
1.58374e-37	0.321781	0.319	0.17	2.4673e-33	ciliary band	WHL22.747266	Sp-Glur1	glutamate receptor 1 (LOC587837), mRNA	SPU_027899	transport; ion transport; receptor activity; ionotropic glutamate receptor activity; transporter activity; ion channel activity; extracellular-glutamate-gated ion channel activity; membrane	Ligand-gated ion channel; Receptor family ligand binding region; Ligated ion channel L-glutamate- and glycine-binding site	NA
6.95949e-37	0.418203	0.103	0.035	1.08422e-32	ciliary band	WHL22.459693	Sp-Sld5	DNA replication complex GINS protein SLD5 (LOC574880), mRNA	SPU_012376	NA	DNA replication complex GINS protein SLD5 C-terminus; GINS complex protein	DNA_Replication
7.49265e-37	0.346034	0.336	0.184	1.16728e-32	ciliary band	WHL22.104606	Sp-Soxb1	transcription factor SoxB1 (SoxB1), mRNA	SPU_022820	NA	HMG (high mobility group) box; SOX transcription factor; HMG-box domain	Nervous_TF
4.40825e-36	0.344957	0.702	0.576	6.86762e-32	ciliary band	WHL22.687173	Sp-Rps3A	40S ribosomal protein S3a (LOC575056), mRNA	SPU_011352	translation; structural constituent of ribosome; intracellular; ribosome	Ribosomal S3Ae family	Translation_RibosomalProtein
5.55516e-36	0.355133	0.411	0.255	8.65439e-32	ciliary band	WHL22.270412	Sp-Sfrs7l; Sp-Unk_34	serine/arginine-rich splicing factor RSZ21A (LOC584693), mRNA	SPU_016547; SPU_016548	nucleotide binding; nucleic acid binding; zinc ion binding	RNA recognition motif. (a.k.a. RRM, RBD, or RNP domain); Zinc knuckle	NA
7.92763e-36	0.363132	0.598	0.444	1.23504e-31	ciliary band	WHL22.514146	Sp-Dlc4	dynein light chain 4, axonemal (LOC589737), mRNA	SPU_004377	microtubule-based process; microtubule associated complex	Dynein light chain type 1	Cytoskeleton_Dynein
8.57482e-36	0.474633	0.281	0.157	1.33587e-31	ciliary band	WHL22.744450	Sp-SnrpD1	small nuclear ribonucleoprotein Sm D1 (LOC580433), mRNA	SPU_012607	NA	LSM domain	Unclassified
2.80877e-35	0.539934	0.282	0.162	4.37578e-31	ciliary band	WHL22.634523	Sp-ThegL	testicular haploid expressed gene protein (LOC583297), mRNA	SPU_011786	NA	Testicular haploid expressed repeat	NA
4.40798e-35	0.469968	0.131	0.052	6.86719e-31	ciliary band	WHL22.108671	SPU_005728	outer dense fiber protein 3 (LOC578847), mRNA	SPU_005728	NA	Sperm-tail PG-rich repeat	Homolog-of-gene-with-unknown-function
1.69276e-34	0.409936	0.069	0.019	2.63715e-30	ciliary band	WHL22.389872	Sp-FoxG	forkhead transcription factor G (FoxG), mRNA	SPU_009771	regulation of transcription; DNA-templated; sequence-specific DNA binding transcription factor activity; sequence-specific DNA binding	Forkhead domain	Nervous_TF
2.99858e-34	0.446508	0.118	0.045	4.67149e-30	ciliary band	WHL22.270306	Sp-Rabl4	intraflagellar transport protein 27 homolog (LOC581182), transcript variant X2, mRNA	SPU_021236	GTP catabolic process; signal transduction; small GTPase mediated signal transduction; protein transport; GTP binding; intracellular; membrane	Ras family; Ras of Complex, Roc, domain of DAPkinase; ADP-ribosylation factor family	GTPase_Ras_Rab
1.82421e-33	0.476897	0.283	0.164	2.84194e-29	ciliary band	WHL22.95090	Sp-LshmanlsnL	src kinase-associated phosphoprotein 2-A (LOC580191), mRNA	SPU_002117	proteolysis; cell adhesion; metalloendopeptidase activity; nucleus; membrane	Leishmanolysin; Chromo shadow domain; Chromo (CHRromatin Organisation MOdifier) domain	Metalloprotease
1.89467e-33	0.284385	0.042	0.008	2.9517e-29	ciliary band	WHL22.226913	Sp-Hal_1	histidine ammonia-lyase (LOC582356), partial mRNA	SPU_003465	biosynthetic process; catalytic activity; ammonia-lyase activity	Aromatic amino acid lyase	Hydrolase
5.90667e-33	0.491725	0.288	0.169	9.202e-29	ciliary band	WHL22.262913	Sp-Oad_bp58	tetratricopeptide repeat protein 25 (LOC581183), transcript variant X4, mRNA	SPU_015625	protein binding	Tetratricopeptide repeat; Tetratricopeptide repeat; Tetratricopeptide repeat	Cytoskeleton_Dynein
7.2318e-33	0.380114	0.156	0.068	1.12664e-28	ciliary band	WHL22.451139	SPU_021384	uncharacterized LOC584768 (LOC584768), mRNA	SPU_021384	protein binding	NA	ExtracellularMatrix
1.15637e-32	0.412194	0.156	0.069	1.80151e-28	ciliary band	WHL22.366016	Sp-Atub1; SPU_010469; Sp-Atub13; SPU_016614; SPU_019989; Sp-Atub5; Sp-Atub6; SPU_024616; Sp-Tuba1c_1	tubulin alpha-1 chain-like (LOC584364), transcript variant X1, mRNA	SPU_007435; SPU_010469; SPU_012679; SPU_016614; SPU_019989; SPU_019990; SPU_024615; SPU_024616; SPU_024617	GTP catabolic process; microtubule-based process; protein polymerization; GTPase activity; structural constituent of cytoskeleton; GTP binding; microtubule; protein complex	Tubulin/FtsZ family, GTPase domain; Tubulin C-terminal domain; Tubulin domain	NA
1.4532e-32	0.34365	0.51	0.364	2.26393e-28	ciliary band	WHL22.456851	Sp-Unk_89; Sp-Axndhc10h	dynein heavy chain 10, axonemal (LOC585218), partial mRNA	SPU_011876; SPU_030231	microtubule-based movement; microtubule motor activity; ATP binding; ATPase activity	Dynein heavy chain, N-terminal region 1; Hydrolytic ATP binding site of dynein motor region; Dynein heavy chain, N-terminal region 2	NA
1.47948e-32	0.445017	0.101	0.036	2.30488e-28	ciliary band	WHL22.53517	Sp-Udg	uracil-DNA glycosylase (LOC586702), mRNA	SPU_004357	DNA repair; base-excision repair; uracil DNA N-glycosylase activity; hydrolase activity; hydrolyzing N-glycosyl compounds	Uracil DNA glycosylase superfamily	Hydrolase
2.14498e-32	0.528537	0.279	0.165	3.34166e-28	ciliary band	WHL22.371928	SPU_017778	uncharacterized protein C9orf135 (LOC580840), mRNA	SPU_017778	NA	Domain of unknown function (DUF4572)	NA
2.31912e-32	0.306284	0.042	0.008	3.61295e-28	ciliary band	WHL22.118336	Sp-Mmp21L	matrix metalloproteinase-21 (LOC100891378), transcript variant X2, mRNA	SPU_027219	proteolysis; metalloendopeptidase activity; metallopeptidase activity; zinc ion binding; extracellular matrix	Matrixin; Hemopexin; Putative peptidoglycan binding domain	Metalloprotease
3.92143e-32	0.405216	0.118	0.046	6.1092e-28	ciliary band	WHL22.584480	Sp-Nasp	nuclear histone binding protein (LOC373260), mRNA	SPU_012393	protein binding	SHNi-TPR	Unclassified
5.03004e-32	0.260536	0.741	0.623	7.8363e-28	ciliary band	WHL22.568244	Sp-HH3.3	histone H3.3 (LOC586375), mRNA	SPU_014711	nucleosome assembly; DNA binding; protein heterodimerization activity; nucleosome	Core histone H2A/H2B/H3/H4	Histone_Variant
7.24256e-32	0.360569	0.313	0.182	1.12832e-27	ciliary band	WHL22.143520	Sp-Btg4	maternal B9.15 protein-like (LOC587987), mRNA	SPU_019385	NA	BTG family	Transcription_Regulation
7.69737e-32	0.443067	0.101	0.037	1.19917e-27	ciliary band	WHL22.761246	Sp-Pkd2	polycystic kidney disease protein 2 (pkd2), mRNA	SPU_010579	calcium ion binding; membrane	Polycystin cation channel; Ion transport protein; Ferredoxin I 4Fe-4S cluster domain	CalciumToolkit
8.2559e-32	0.408269	0.306	0.184	1.28619e-27	ciliary band	WHL22.464156	Sp-Rbm8A	RNA-binding protein 8A (LOC582486), mRNA	SPU_019673	RNA processing; nucleotide binding; nucleic acid binding; RNA binding; nucleus; cytoplasm	RNA recognition motif. (a.k.a. RRM, RBD, or RNP domain); RNA binding motif	Unclassified
1.03649e-31	0.397523	0.141	0.06	1.61475e-27	ciliary band	WHL22.495958	SPU_007704; Sp-Ack1; SPU_018215; Sp-Ack1_1	tyrosine-protein kinase PR2 (LOC587777), transcript variant X2, mRNA	SPU_007704; SPU_016505; SPU_018215; SPU_028412	NA	NA	NA
2.28323e-31	0.461591	0.103	0.039	3.55704e-27	ciliary band	WHL22.676756	Sp-Pola; SPU_022558; Sp-Pola1	DNA polymerase alpha catalytic subunit (LOC584095), mRNA	SPU_000210; SPU_022558; SPU_023010	nucleobase-containing compound metabolic process; DNA replication; nucleotide binding; nucleoside binding; nucleic acid binding; DNA binding; DNA-directed DNA polymerase activity	DNA polymerase family B; DNA Polymerase alpha zinc finger; DNA polymerase family B, exonuclease domain	DNA_Replication
5.32968e-31	0.31759	0.849	0.77	8.30312e-27	ciliary band	WHL22.503337	Sp-Dynlc2-5a; Sp-Dynlc2-5b; Sp-Dynlc2-5c; Sp-Dynlc2-2	uncharacterized LOC592722 (LOC592722), mRNA	SPU_024497; SPU_024498; SPU_024499; SPU_025272	microtubule-based process; microtubule associated complex	Dynein light chain type 1	Cytoskeleton_Dynein
7.80359e-31	0.398048	0.158	0.072	1.21572e-26	ciliary band	WHL22.296748	Sp-Efhc2_1	EF-hand domain-containing family member C2 (LOC593993), mRNA	SPU_009896	calcium ion binding	DUF1126 PH-like domain; EF-hand domain pair	Homolog-of-gene-with-unknown-function
9.7403e-31	0.311542	0.531	0.38	1.51744e-26	ciliary band	WHL22.644925	Sp-Sfrs6	serine/arginine-rich splicing factor 6 (LOC594205), transcript variant X2, mRNA	SPU_002681	nucleotide binding; nucleic acid binding	RNA recognition motif. (a.k.a. RRM, RBD, or RNP domain)	Unclassified
1.26242e-30	0.334119	0.673	0.555	1.96672e-26	ciliary band	WHL22.214395	Sp-Rps4_1	40S ribosomal protein S4-like (LOC583495), partial mRNA	SPU_028866	translation; structural constituent of ribosome; intracellular; ribosome	40S ribosomal protein S4 C-terminus; KOW motif	NA
1.93748e-30	0.372261	0.078	0.025	3.0184e-26	ciliary band	WHL22.62120	Sp-Ctps	CTP synthase 1 (LOC575088), mRNA	SPU_009437	pyrimidine nucleotide biosynthetic process; CTP synthase activity	Glutamine amidotransferase class-I; CTP synthase N-terminus; Peptidase C26	Metabolism_Nucleotide
3.06436e-30	0.466894	0.111	0.044	4.77397e-26	ciliary band	WHL22.84915	Sp-Cdkl2	cyclin-dependent kinase-like 2 (LOC578803), mRNA	SPU_000563	protein phosphorylation; protein kinase activity; protein serine/threonine kinase activity; ATP binding; transferase activity; transferring phosphorus-containing groups	Protein kinase domain; Protein tyrosine kinase	Kinase_CMGC
7.39937e-30	0.452418	0.23	0.125	1.15275e-25	ciliary band	WHL22.139068	SPU_014186	outer dense fiber protein 3 (LOC577413), transcript variant X1, mRNA	SPU_014186	NA	Sperm-tail PG-rich repeat	Homolog-of-gene-with-unknown-function
2.15769e-29	0.483155	0.218	0.118	3.36146e-25	ciliary band	WHL22.491331	SPU_020005	UPF0686 protein C11orf1 homolog (LOC580567), mRNA	SPU_020005	nucleus	Protein of unknown function (DUF1143)	Homolog-of-gene-with-unknown-function
3.08619e-29	0.387849	0.121	0.05	4.80797e-25	ciliary band	WHL22.477689	SPU_016944	UPF0722 protein (LOC762545), mRNA	SPU_016944	NA	NA	NA
3.2304e-29	0.330951	0.388	0.251	5.03264e-25	ciliary band	WHL22.522923	Sp-Sephs2; SPU_022406	selenide, water dikinase (LOC575732), mRNA	SPU_002295; SPU_022406	catalytic activity; selenide; water dikinase activity; ATP binding	AIR synthase related protein, C-terminal domain; AIR synthase related protein, N-terminal domain	Ligase
3.70983e-29	0.555675	0.226	0.128	5.77955e-25	ciliary band	WHL22.145405	Sp-Dnl1	DNA ligase 1 (LOC752989), mRNA	SPU_016791	DNA replication; DNA repair; DNA recombination; DNA ligation involved in DNA repair; DNA binding; DNA ligase activity; DNA ligase (ATP) activity; ATP binding	DNA ligase N terminus; ATP dependent DNA ligase domain; ATP dependent DNA ligase C terminal region	Ligase
6.20172e-29	0.500424	0.358	0.241	9.66166e-25	ciliary band	WHL22.364829	SPU_005437	protein SPATA45 homolog (LOC574952), mRNA	SPU_005437	NA	NA	NA
9.79624e-29	0.395403	0.209	0.11	1.52616e-24	ciliary band	WHL22.327792	Sp-Mn	protein mago nashi homolog (LOC586115), mRNA	SPU_026559	nucleus	Mago nashi protein	GermLineDeterminant
1.75287e-28	0.34036	0.076	0.025	2.7308e-24	ciliary band	WHL22.339234	Sp-Ift74	intraflagellar transport protein 74 homolog (LOC585028), mRNA	SPU_018337	NA	NA	NA
1.76677e-28	0.400166	0.162	0.077	2.75246e-24	ciliary band	WHL22.468365	Sp-FoxJ1	forkhead transcription factor J1 (FoxJ1), mRNA	SPU_027969	regulation of transcription; DNA-templated; sequence-specific DNA binding transcription factor activity; sequence-specific DNA binding	Forkhead domain	Nervous_TF
2.18485e-28	0.368968	0.279	0.166	3.40378e-24	ciliary band	WHL22.552578	WHL22.552578	small nuclear ribonucleoprotein Sm D2 (LOC754356), mRNA	NA	NA	NA	NA
3.89855e-28	0.461146	0.286	0.177	6.07355e-24	ciliary band	WHL22.523709	Sp-Pacrg	parkin coregulated gene protein homolog (LOC586307), mRNA	SPU_004619	binding	Parkin co-regulated protein	Chaperone
4.43576e-28	0.43513	0.231	0.13	6.91046e-24	ciliary band	WHL22.147403	Sp-Dlc2	dynein light chain 1, axonemal (LOC581052), mRNA	SPU_018854	protein binding	Leucine Rich repeats (2 copies); Leucine-rich repeat; Leucine rich repeat	Cytoskeleton_Dynein
6.45049e-28	0.335616	0.127	0.054	1.00492e-23	ciliary band	WHL22.699004	Sp-Spag8	sperm-associated antigen 8 (LOC575989), mRNA	SPU_025980	microtubule binding	NA	NA
1.88688e-27	0.40153	0.154	0.074	2.93957e-23	ciliary band	WHL22.78316	Sp-SnrpD3_1; Sp-SnrpD3	argininosuccinate lyase (LOC574725), mRNA	SPU_010849; SPU_024030	NA	LSM domain	NA
2.25496e-27	0.269687	0.421	0.282	3.513e-23	ciliary band	WHL22.457267	Sp-Glul	glutamine synthetase (LOC574926), mRNA	SPU_023123	glutamine biosynthetic process; nitrogen compound metabolic process; catalytic activity; glutamate-ammonia ligase activity	Glutamine synthetase, beta-Grasp domain; Glutamine synthetase, catalytic domain	Metabolism_AminoAcid
3.19303e-27	0.328414	0.108	0.044	4.97442e-23	ciliary band	WHL22.261292	Sp-Cct6A	T-complex protein 1 subunit zeta (LOC577393), mRNA	SPU_019081	protein folding; cellular protein metabolic process; ATP binding; unfolded protein binding	TCP-1/cpn60 chaperonin family	Chaperone
5.98334e-27	0.386683	0.427	0.311	9.32145e-23	ciliary band	WHL22.598931	SPU_028725	uncharacterized LOC576787 (LOC576787), misc_RNA	SPU_028725	NA	Translation machinery associated TMA7	Translation
8.9864e-27	0.375429	0.159	0.077	1.39999e-22	ciliary band	WHL22.423673	Sp-Hypp_1991	hepatoma-derived growth factor-related protein 2 (LOC763089), mRNA	SPU_028916	NA	Lens epithelium-derived growth factor (LEDGF); PWWP domain	Unclassified
1.19836e-26	0.445531	0.296	0.186	1.86692e-22	ciliary band	WHL22.268820	Sp-Tektin1-4; Sp-Tektin1-3	tektin-1 (LOC576964), mRNA	SPU_006453; SPU_013841	microtubule cytoskeleton organization; microtubule	Tektin family	Cytoskeleton_MicrotubuleAssociated
1.35777e-26	0.252339	0.044	0.01	2.11527e-22	ciliary band	WHL22.70691	WHL22.70691	uncharacterized LOC100893789 (LOC100893789), mRNA	NA	NA	NA	NA
1.45662e-26	0.483379	0.178	0.093	2.26928e-22	ciliary band	WHL22.493663	SPU_009254; Sp-Ccdc135	coiled-coil domain-containing protein lobo homolog (LOC590655), partial mRNA	SPU_009254; SPU_009255	NA	NA	NA
2.1935e-26	0.301179	0.059	0.018	3.41725e-22	ciliary band	WHL22.234491	WHL22.234491	uncharacterized LOC755020 (LOC755020), mRNA	NA	NA	NA	NA
4.16374e-26	0.370315	0.106	0.043	6.4867e-22	ciliary band	WHL22.238287	Sp-C20orf85L	uncharacterized protein C20orf85 homolog (LOC577148), mRNA	SPU_006391	NA	Normal lung function maintenance, Low in Lung Cancer 1 protein	NA
4.66384e-26	0.266591	0.06	0.018	7.2658e-22	ciliary band	WHL22.370578	WHL22.370578	serine/arginine repetitive matrix protein 2-like (LOC100890356), mRNA	NA	NA	NA	NA
4.95674e-26	0.322363	0.073	0.024	7.72211e-22	ciliary band	WHL22.761466	SPU_018502; SPU_020574	polycystic kidney disease protein 2 (pkd2), mRNA	SPU_018502; SPU_020574	NA	NA	NA
7.02444e-26	0.351925	0.083	0.03	1.09434e-21	ciliary band	WHL22.461866	Sp-TrafB	TNF receptor-associated factor 4 (LOC574808), mRNA	SPU_023069	signal transduction; protein ubiquitination; regulation of apoptotic process; ubiquitin-protein ligase activity; protein binding; zinc ion binding	TRAF-type zinc finger; Zinc finger, C3HC4 type (RING finger)	ImmuneSystem_Signal
9.89627e-26	0.370913	0.078	0.028	1.54174e-21	ciliary band	WHL22.436319	Sp-Tmem26_5	transmembrane protein 26 (LOC593206), mRNA	SPU_024582	NA	Transmembrane protein 26	Transmembrane
1.05456e-25	0.436374	0.208	0.115	1.6429e-21	ciliary band	WHL22.422365	SPU_004486	UPF0691 protein C9orf116 homolog (LOC100891474), mRNA	SPU_004486	NA	Domain of unknown function (DUF4490)	NA
1.2266e-25	0.419716	0.43	0.322	1.91092e-21	ciliary band	WHL22.388457	Sp-SnrpG	small nuclear ribonucleoprotein G (LOC583159), mRNA	SPU_000627	NA	LSM domain	Unclassified
1.98954e-25	0.315634	0.089	0.034	3.0995e-21	ciliary band	WHL22.710276	SPU_010891	uncharacterized LOC763406 (LOC763406), mRNA	SPU_010891	NA	NA	NA
2.93534e-25	0.423075	0.093	0.037	4.57296e-21	ciliary band	WHL22.35871	Sp-Hypp_2602	uncharacterized LOC577943 (LOC577943), mRNA	SPU_022196	protein binding	Ankyrin repeat	Unclassified
3.94149e-25	0.441	0.127	0.058	6.14044e-21	ciliary band	WHL22.54575	WHL22.54575	uncharacterized LOC762820 (LOC762820), transcript variant X1, mRNA	NA	NA	NA	NA
7.37415e-25	0.327126	0.206	0.112	1.14882e-20	ciliary band	WHL22.88073	Sp-HnrpcL	heterogeneous nuclear ribonucleoprotein C-like 1 (LOC575471), mRNA	SPU_005433	nucleotide binding; nucleic acid binding	RNA recognition motif. (a.k.a. RRM, RBD, or RNP domain); RNA recognition motif. (a.k.a. RRM, RBD, or RNP domain)	Unclassified
1.02694e-24	0.356222	0.162	0.082	1.59987e-20	ciliary band	WHL22.94034	Sp-Dera	deoxyribose-phosphate aldolase (LOC591843), transcript variant X1, mRNA	SPU_025697	deoxyribonucleotide catabolic process; catalytic activity; deoxyribose-phosphate aldolase activity; lyase activity; cytoplasm	DeoC/LacD family aldolase	Metabolism_Nucleotide
1.39557e-24	0.376164	0.201	0.11	2.17415e-20	ciliary band	WHL22.754000	SPU_014472; Sp-Pcbp1; Sp-Pcbp2	heterogeneous nuclear ribonucleoprotein K-like (LOC590094), transcript variant X3, mRNA	SPU_014472; SPU_027712; SPU_027713	RNA binding	KH domain; KH domain	Unclassified
1.42155e-24	0.385977	0.209	0.117	2.21463e-20	ciliary band	WHL22.378664	SPU_022266	EF-hand calcium-binding domain-containing protein 2 (LOC578744), partial mRNA	SPU_022266	calcium ion binding	EF-hand domain pair; EF-hand domain; EF-hand domain	NA
1.82393e-24	0.414018	0.189	0.104	2.8415e-20	ciliary band	WHL22.644494	WHL22.644494	small nuclear ribonucleoprotein Sm D2 (LOC753400), mRNA	NA	NA	NA	NA
1.91488e-24	0.353198	0.091	0.036	2.98319e-20	ciliary band	WHL22.682490	Sp-C3orf16L	protein ANKUB1 (LOC587133), mRNA	SPU_016482	protein binding	Ubiquitin family; Ankyrin repeats (3 copies); Ankyrin repeats (many copies)	NA
2.0233e-24	0.43773	0.288	0.186	3.1521e-20	ciliary band	WHL22.342126	SPU_020863	DPY30 domain-containing protein 1 (LOC592523), mRNA	SPU_020863	NA	Dpy-30 motif	Unclassified
2.24381e-24	0.2745	0.075	0.026	3.49562e-20	ciliary band	WHL22.2869	SPU_000795	tctex1 domain-containing protein 2-like (LOC100887991), mRNA	SPU_000795	NA	Tctex-1 family	NA
6.59852e-24	0.350157	0.359	0.247	1.02798e-19	ciliary band	WHL22.589435	Sp-Bat1	spliceosome RNA helicase Ddx39b (LOC580001), transcript variant X1, mRNA	SPU_024704	nucleic acid binding; helicase activity; ATP binding	DEAD/DEAH box helicase; Helicase conserved C-terminal domain; Type III restriction enzyme, res subunit	NucleicAcid_Helicase
2.09058e-23	0.257409	0.617	0.502	3.25692e-19	ciliary band	WHL22.624240	Sp-Slc25a3_2	phosphate carrier protein, mitochondrial (LOC577743), mRNA	SPU_009872	transmembrane transport	Mitochondrial carrier protein	Metabolism_Energy
7.96781e-23	0.305552	0.048	0.014	1.24131e-18	ciliary band	WHL22.145812	Sp-Srcr97	scavenger receptor cysteine-rich domain-containing group B protein (LOC591683), mRNA	SPU_010993	scavenger receptor activity; membrane	Scavenger receptor cysteine-rich domain; Scavenger receptor cysteine-rich domain; Hepsin, SRCR domain	ImmuneSystem_Receptor_SRCR
1.02033e-22	0.346099	0.154	0.078	1.58957e-18	ciliary band	WHL22.2848	Sp-Hmg2l1	HMG box-containing protein 4 (LOC575292), transcript variant X3, mRNA	SPU_000793	NA	HMG (high mobility group) box	Unclassified
1.11503e-22	0.348672	0.112	0.051	1.7371e-18	ciliary band	WHL22.644522	SPU_018965	uncharacterized LOC580808 (LOC580808), mRNA	SPU_018965	NA	NA	NA
1.42421e-22	0.307149	0.099	0.041	2.21878e-18	ciliary band	WHL22.647310	Sp-Nckx_1	sodium/potassium/calcium exchanger 3 (LOC100888839), partial mRNA	SPU_009526	transmembrane transport; integral component of membrane	Sodium/calcium exchanger protein	CalciumToolkit
1.44579e-22	0.342616	0.134	0.065	2.2524e-18	ciliary band	WHL22.436683	Sp-Ddx48	eukaryotic initiation factor 4A-III (LOC580266), mRNA	SPU_014808	nucleic acid binding; helicase activity; ATP binding; ATP-dependent helicase activity	DEAD/DEAH box helicase; Helicase conserved C-terminal domain; AAA domain	NucleicAcid_Helicase
3.25745e-22	0.340742	0.083	0.033	5.07479e-18	ciliary band	WHL22.626923	Sp-Dhfr	dihydrofolate reductase (LOC575335), mRNA	SPU_012471	glycine biosynthetic process; nucleotide biosynthetic process; oxidation-reduction process; dihydrofolate reductase activity; NADP binding	Dihydrofolate reductase	Metabolism_Coenzyme
4.77701e-22	0.38351	0.123	0.059	7.4421e-18	ciliary band	WHL22.621003	Sp-C6orf199L	adenylate kinase 9 (LOC588475), transcript variant X4, mRNA	SPU_019556	nucleobase-containing compound metabolic process; nucleotide binding; ATP binding; nucleoside-triphosphatase activity; nucleobase-containing compound kinase activity	Adenylate kinase; AAA domain; ATPase family associated with various cellular activities (AAA)	Metabolism_Nucleotide
7.93737e-22	0.378865	0.155	0.081	1.23656e-17	ciliary band	WHL22.684029	Sp-Ttll10L; Sp-Ttll10L_2	probable beta-tubulin polyglutamylase (LOC578816), mRNA	SPU_013744; SPU_013817	cellular protein modification process	Tubulin-tyrosine ligase family	Ligase
1.20797e-21	0.291676	0.101	0.044	1.88189e-17	ciliary band	WHL22.677166	Sp-KatsA	katanin p60 (KATNA1), transcript variant X2, mRNA	SPU_001000	nucleotide binding; ATP binding; nucleoside-triphosphatase activity	ATPase family associated with various cellular activities (AAA); AAA+ lid domain; Holliday junction DNA helicase RuvB P-loop domain	Cytoskeleton_MicrotubuleAssociated
1.21986e-21	0.343875	0.224	0.133	1.90042e-17	ciliary band	WHL22.483297	Sp-Nop56	nucleolar protein 56 (LOC590067), mRNA	SPU_009891	NA	snoRNA binding domain, fibrillarin; NOP5NT (NUC127) domain	NA
1.27475e-21	0.365493	0.209	0.123	1.98593e-17	ciliary band	WHL22.132210	SPU_002227; SPU_022385	protein pitchfork (LOC589981), mRNA	SPU_002227; SPU_022385	NA	NA	NA
2.21238e-21	0.308389	0.099	0.043	3.44666e-17	ciliary band	WHL22.478912	SPU_009303	RIIa domain-containing protein 1 (LOC752632), mRNA	SPU_009303	NA	Regulatory subunit of type II PKA R-subunit	NA
3.41084e-21	0.261612	0.522	0.409	5.31375e-17	ciliary band	WHL22.29482	Sp-NclL_2	nucleolin (LOC765147), transcript variant X1, mRNA	SPU_004126	nucleotide binding; nucleic acid binding	RNA recognition motif. (a.k.a. RRM, RBD, or RNP domain)	Unclassified
4.1274e-21	0.344479	0.086	0.035	6.43007e-17	ciliary band	WHL22.579530	Sp-Mcm6	zygotic DNA replication licensing factor mcm6-B (LOC577868), transcript variant X1, mRNA	SPU_023819	DNA replication; DNA replication initiation; DNA binding; DNA helicase activity; ATP binding; nucleus; MCM complex	MCM P-loop domain; MCM OB domain; MCM6 C-terminal winged-helix domain	DNA_Replication
4.37841e-21	0.374703	0.156	0.083	6.82113e-17	ciliary band	WHL22.323554	Sp-Slc28a3_1	solute carrier family 28 member 3 (LOC574602), transcript variant X3, mRNA	SPU_015966	transport; nucleoside binding; nucleoside:sodium symporter activity; membrane	Na+ dependent nucleoside transporter C-terminus; Na+ dependent nucleoside transporter N-terminus; Nucleoside recognition	Transporter_Nucleoside
4.54284e-21	0.325839	0.111	0.052	7.0773e-17	ciliary band	WHL22.355574	Sp-Cc2d2a-2	coiled-coil and C2 domain-containing protein 2A (LOC575583), mRNA	SPU_010514	NA	Family of unknown function (DUF5523)	NA
1.20307e-20	0.327684	0.085	0.035	1.87426e-16	ciliary band	WHL22.349601	WHL22.349601	uncharacterized LOC105437551 (LOC105437551), mRNA	NA	NA	NA	NA
2.01087e-20	0.307299	0.081	0.033	3.13273e-16	ciliary band	WHL22.8655	Sp-Hypp_527	RNA-binding protein 25 (LOC581159), transcript variant X1, mRNA	SPU_007813	NA	NA	NA
2.94033e-20	0.349079	0.206	0.122	4.58074e-16	ciliary band	WHL22.211896	Sp-Ttc16	tetratricopeptide repeat protein 16 (LOC587891), mRNA	SPU_010186	protein binding	Tetratricopeptide repeat; Tetratricopeptide repeat; TPR repeat	Unclassified
6.4798e-20	0.261534	0.08	0.032	1.00949e-15	ciliary band	WHL22.499990	Sp-Hypp_2173; Sp-Hypp_2174; Sp-InvsL	ankyrin repeat domain-containing protein 27 (LOC584491), mRNA	SPU_014848; SPU_014849; SPU_022677	protein binding	Ankyrin repeats (3 copies); Ankyrin repeat; Ankyrin repeats (many copies)	Unclassified
1.30258e-19	0.284096	0.173	0.096	2.02929e-15	ciliary band	WHL22.259626	Sp-Cbr1_2; SPU_014400	carbonyl reductase [NADPH] 1 (LOC100889317), mRNA	SPU_014399; SPU_014400	metabolic process; oxidoreductase activity	short chain dehydrogenase; Enoyl-(Acyl carrier protein) reductase; KR domain	Dehydrogenase
3.82389e-19	0.337788	0.262	0.17	5.95724e-15	ciliary band	WHL22.538252	Sp-Cdk1	cyclin-dependent kinase 1 (LOC575965), mRNA	SPU_002210	protein phosphorylation; protein kinase activity; protein serine/threonine kinase activity; ATP binding; transferase activity; transferring phosphorus-containing groups	Protein kinase domain; Protein tyrosine kinase; Haspin like kinase domain	CellCycle
4.49573e-19	0.278376	0.183	0.104	7.00389e-15	ciliary band	WHL22.325705	SPU_012624	FK506-binding nuclear protein-like (LOC580803), mRNA	SPU_012624	NA	NA	NA
6.22834e-19	0.282222	0.143	0.076	9.70312e-15	ciliary band	WHL22.124535	SPU_008266	intraflagellar transport protein 25 homolog (LOC764898), transcript variant X1, mRNA	SPU_008266	NA	NA	NA
6.30999e-19	0.268554	0.053	0.018	9.83033e-15	ciliary band	WHL22.299224	Sp-Ttll3; SPU_019571	tubulin monoglycylase TTLL3 (LOC578867), transcript variant X3, mRNA	SPU_019570; SPU_019571	cellular protein modification process	Tubulin-tyrosine ligase family	Ligase
6.32829e-19	0.373083	0.11	0.053	9.85884e-15	ciliary band	WHL22.69670	SPU_022757	cell wall integrity protein scw1 (LOC762862), transcript variant X1, mRNA	SPU_022757	nucleotide binding; nucleic acid binding	RNA recognition motif. (a.k.a. RRM, RBD, or RNP domain)	Unclassified
6.37959e-19	0.300628	0.146	0.078	9.93876e-15	ciliary band	WHL22.627672	SPU_016895	uncharacterized protein C10orf107 homolog (LOC592209), mRNA	SPU_016895	NA	Flagellar C1a complex subunit C1a-32	NA
9.16632e-19	0.366302	0.13	0.068	1.42802e-14	ciliary band	WHL22.460019	Sp-Drd1	D(1) dopamine receptor-like (LOC581753), mRNA	SPU_011320	G-protein coupled receptor signaling pathway; G-protein coupled receptor activity; dopamine neurotransmitter receptor activity; integral component of plasma membrane; integral component of membrane	7 transmembrane receptor (rhodopsin family); Serpentine type 7TM GPCR chemoreceptor Srsx; Serpentine type 7TM GPCR chemoreceptor Srx	Nervous_NeurotransmitterRelated
1.11869e-18	0.3014	0.105	0.049	1.74281e-14	ciliary band	WHL22.629412	Sp-Pkdh1l1	uncharacterized LOC581747 (LOC581747), mRNA	SPU_026381	NA	MYND finger	NA
2.99667e-18	0.316311	0.127	0.066	4.66851e-14	ciliary band	WHL22.551502	Sp-Ccdc39	coiled-coil domain-containing protein 39 (LOC576304), mRNA	SPU_020526	NA	NA	NA
4.65511e-18	0.250508	0.315	0.209	7.2522e-14	ciliary band	WHL22.199735	SPU_022062	cytochrome c oxidase subunit 4 isoform 1, mitochondrial (LOC591899), mRNA	SPU_022062	cytochrome-c oxidase activity	Cytochrome c oxidase subunit IV	Oxidase
4.95247e-18	0.28177	0.052	0.018	7.71546e-14	ciliary band	WHL22.757771	Sp-Cdk2; Sp-Cdk2_1	cyclin-dependent kinase 2 (LOC585950), mRNA	SPU_007655; SPU_021839	protein phosphorylation; protein kinase activity; protein serine/threonine kinase activity; ATP binding; transferase activity; transferring phosphorus-containing groups	Protein kinase domain; Protein tyrosine kinase; Phosphotransferase enzyme family	CellCycle
5.29001e-18	0.346516	0.119	0.061	8.24131e-14	ciliary band	WHL22.4747	Sp-Arl2l1l	ADP-ribosylation factor-like protein 13B (LOC591340), mRNA	SPU_020641	intracellular protein transport; small GTPase mediated signal transduction; GTP binding; intracellular	ADP-ribosylation factor family; G-protein alpha subunit; Ras family	GTPase_Ras_Arf
6.13004e-18	0.295381	0.081	0.035	9.54999e-14	ciliary band	WHL22.3338	Sp-Hypp_1780	uncharacterized LOC579958 (LOC579958), mRNA	SPU_008348	NA	Domain of unknown function with conserved HDNR motif	NA
7.89886e-18	0.290084	0.28	0.189	1.23056e-13	ciliary band	WHL22.581477	Sp-Cwc22	pre-mRNA-splicing factor CWC22 homolog (LOC576841), mRNA	SPU_010596	RNA binding; binding; protein binding	MA3 domain	NA
8.4367e-18	0.373237	0.246	0.164	1.31435e-13	ciliary band	WHL22.126248	SPU_004349	sterile alpha motif domain-containing protein 15 (LOC100893598), mRNA	SPU_004349	protein binding	SAM domain (Sterile alpha motif); SAM domain (Sterile alpha motif)	Unclassified
1.03308e-17	0.259166	0.061	0.023	1.60943e-13	ciliary band	WHL22.589352	Sp-Mk/Styx; Sp-Dusp24	alpha-ketoglutarate-dependent dioxygenase alkB homolog 4-like (LOC105446801), partial mRNA	SPU_000663; SPU_018623	protein dephosphorylation; protein tyrosine/serine/threonine phosphatase activity	Dual specificity phosphatase, catalytic domain; Rhodanese-like domain	Phosphatase_Tyrosine
6.94601e-17	0.297359	0.101	0.049	1.08212e-12	ciliary band	WHL22.117840	Sp-Whsc1; Sp-Trx	histone-lysine N-methyltransferase NSD2 (LOC580047), transcript variant X2, mRNA	SPU_004382; SPU_027218	protein binding; zinc ion binding	PWWP domain; PHD-finger; HMG (high mobility group) box	Histone_Methyltransferase
7.44782e-17	0.340859	0.172	0.102	1.1603e-12	ciliary band	WHL22.28828	Sp-Ap4; Sp-Tcfap4L	transcription factor AP-4 (LOC578637), mRNA	SPU_003179; SPU_007723	protein dimerization activity	Helix-loop-helix DNA-binding domain	TranscriptionFactor_bHLH
8.87123e-17	0.257278	0.071	0.03	1.38205e-12	ciliary band	WHL22.605564	Sp-IncenpL	inner centromere protein (LOC582213), mRNA	SPU_015416	NA	Inner centromere protein, ARK binding region	NA
1.06301e-16	0.288915	0.08	0.035	1.65607e-12	ciliary band	WHL22.228203	Sp-TransglutL	extracellular transglutaminase (etg), transcript variant X2, mRNA	SPU_005702	peptide cross-linking; protein-glutamine gamma-glutamyltransferase activity	Transglutaminase family; Transglutaminase family, C-terminal ig like domain; Transglutaminase-like superfamily	ImmuneSystem_Coagulation
1.15002e-16	0.351551	0.222	0.145	1.79161e-12	ciliary band	WHL22.393851	SPU_007671	enkurin (LOC578858), mRNA	SPU_007671	NA	Calmodulin-binding	NA
1.16075e-16	0.327032	0.319	0.228	1.80833e-12	ciliary band	WHL22.682404	Sp-Armc4; Sp-Armc4-2	armadillo repeat-containing protein 4 (LOC589555), transcript variant X1, mRNA	SPU_004121; SPU_007521	binding; protein binding	Armadillo/beta-catenin-like repeat; HEAT repeats; Adaptin N terminal region	Unclassified
1.33813e-16	0.352472	0.181	0.111	2.08467e-12	ciliary band	WHL22.38552	Sp-Casc1	protein CASC1 (LOC582795), mRNA	SPU_022570	NA	Cancer susceptibility candidate 1 N-terminus; Cancer susceptibility candidate 1	NA
2.31646e-16	0.304759	0.201	0.126	3.60881e-12	ciliary band	WHL22.241394	Sp-Wdr60	transposon Tf2-1 polyprotein (LOC100893111), mRNA	SPU_000243	protein binding	NA	Unclassified
4.84698e-16	0.299461	0.218	0.138	7.55111e-12	ciliary band	WHL22.706948	Sp-EpimL	UDP-glucuronic acid decarboxylase 1-like (LOC579449), transcript variant X1, mRNA	SPU_027926	cellular metabolic process; catalytic activity; coenzyme binding	NAD dependent epimerase/dehydratase family; GDP-mannose 4,6 dehydratase; RmlD substrate binding domain	Isomerase
7.18784e-16	0.283757	0.067	0.029	1.11979e-11	ciliary band	WHL22.627166	Sp-Arl2l1	ADP-ribosylation factor-like protein 13B (LOC588058), mRNA	SPU_019558	intracellular protein transport; small GTPase mediated signal transduction; GTP binding; intracellular	ADP-ribosylation factor family; G-protein alpha subunit; Ras family	GTPase_Ras_Arf
7.51916e-16	0.284747	0.054	0.021	1.17141e-11	ciliary band	WHL22.228763	Sp-Fen1	leucine-rich repeat-containing protein 69 (LOC579382), transcript variant X1, mRNA	SPU_003067	DNA repair; DNA binding; catalytic activity; nuclease activity	XPG N-terminal domain; 5'-3' exonuclease, C-terminal SAM fold; XPG I-region	NA
1.68357e-15	0.261157	0.052	0.02	2.62283e-11	ciliary band	WHL22.582346	SPU_014633	uncharacterized LOC584210 (LOC584210), ncRNA	SPU_014633	NA	Trichohyalin-plectin-homology domain	NA
1.72235e-15	0.272739	0.087	0.042	2.68325e-11	ciliary band	WHL22.438656	SPU_009820; Sp-Wdr92	uncharacterized LOC580992 (LOC580992), mRNA	SPU_009820; SPU_026227	NA	NA	NA
1.77405e-15	0.276238	0.184	0.113	2.76379e-11	ciliary band	WHL22.568858	Sp-Mll4L; Sp-Trx2; Sp-Mll1L	uncharacterized LOC579728 (LOC579728), mRNA	SPU_015420; SPU_015421; SPU_022485	DNA binding; protein binding; zinc ion binding	PHD-finger; CXXC zinc finger domain	NA
2.51211e-15	0.290333	0.24	0.159	3.91361e-11	ciliary band	WHL22.376053	Sp-Psmd1_1	DNA-binding protein HEXBP (LOC579871), transcript variant X1, mRNA	SPU_024911	nucleic acid binding; zinc ion binding	Zinc knuckle; Zinc knuckle	NA
3.0172e-15	0.263231	0.106	0.054	4.70049e-11	ciliary band	WHL22.58367	Sp-Cenpc1; Sp-Hypp_935	retinitis pigmentosa 1-like 1 protein (LOC589199), transcript variant X1, mRNA	SPU_003772; SPU_019315	kinetochore assembly; centromeric DNA binding; kinetochore	Mif2/CENP-C like; Cupin domain	NA
3.86258e-15	0.298468	0.253	0.174	6.01751e-11	ciliary band	WHL22.517925	SPU_001825	DNA damage-inducible transcript 4-like protein (LOC581972), mRNA	SPU_001825	negative regulation of signal transduction; cytoplasm	RTP801 C-terminal region	Unclassified
6.70202e-15	0.280763	0.084	0.04	1.04411e-10	ciliary band	WHL22.562775	Sp-Pkhd1l1; Sp-FibcystL_1; SPU_026380	fibrocystin-L (LOC575549), mRNA	SPU_017495; SPU_023486; SPU_026380	protein binding	IPT/TIG domain; PA14 domain	NA
8.15344e-15	0.287797	0.168	0.102	1.27022e-10	ciliary band	WHL22.769469	Sp-C1orf173L	glutamate-rich protein 3 (LOC590109), transcript variant X1, mRNA	SPU_020097	NA	Domain of unknown function (DUF4590); Leucine Rich repeat	NA
8.56423e-15	0.351131	0.111	0.061	1.33422e-10	ciliary band	WHL22.723294	Sp-Dyi2	dynein intermediate chain 2, ciliary (LOC100893413), mRNA	SPU_019506	protein binding	NA	Cytoskeleton_Dynein
1.05747e-14	0.336887	0.156	0.094	1.64743e-10	ciliary band	WHL22.331545	Sp-Lbr	delta(14)-sterol reductase (LOC581447), transcript variant X2, mRNA	SPU_012630	oxidation-reduction process; oxidoreductase activity; acting on the CH-CH group of donors;NAD or NADP as acceptor; membrane	Ergosterol biosynthesis ERG4/ERG24 family; Lamin-B receptor of TUDOR domain	NA
1.37908e-14	0.274483	0.078	0.036	2.14846e-10	ciliary band	WHL22.595411	Sp-CycA; Sp-CycA_1	cyclin A (CycA), mRNA	SPU_003528; SPU_011191	regulation of cyclin-dependent protein serine/threoninekinase activity; regulation of cell cycle; protein kinase binding; nucleus	Cyclin, N-terminal domain; Cyclin, C-terminal domain; N-terminal region of cyclin_N	CellCycle
2.6995e-14	0.270237	0.08	0.038	4.20556e-10	ciliary band	WHL22.660042	Sp-Glur3	glutamate receptor 3 (LOC577098), mRNA	SPU_002787	ion transport; receptor activity; ionotropic glutamate receptor activity; ion channel activity; extracellular-glutamate-gated ion channel activity; membrane	Ligated ion channel L-glutamate- and glycine-binding site; Ligand-gated ion channel; Receptor family ligand binding region	NA
3.39742e-14	0.275075	0.104	0.056	5.29284e-10	ciliary band	WHL22.312250	Sp-Rps5	prefoldin subunit 6 (LOC592684), mRNA	SPU_022957	translation; protein folding; RNA binding; structural constituent of ribosome; unfolded protein binding; small ribosomal subunit; prefoldin complex	Ribosomal protein S7p/S5e; Prefoldin subunit	Chaperone
8.35088e-14	0.262413	0.102	0.054	1.30098e-09	ciliary band	WHL22.769929	Sp-Fn3_10	lymphocyte-specific helicase-like (LOC578693), mRNA	SPU_024777	protein binding	Fibronectin type III domain; Interferon-alpha/beta receptor, fibronectin type III; Purple acid Phosphatase, N-terminal domain	Adhesion_Atypical
9.10576e-14	0.274466	0.128	0.074	1.41859e-09	ciliary band	WHL22.228774	Sp-Dic1	thioredoxin domain-containing protein 3 homolog (LOC581919), transcript variant X5, mRNA	SPU_007092	nucleoside diphosphate phosphorylation; GTP biosynthetic process; UTP biosynthetic process; CTP biosynthetic process; cell redox homeostasis; nucleoside diphosphate kinase activity; ATP binding	Nucleoside diphosphate kinase; Thioredoxin	Cytoskeleton_Dynein
1.20132e-13	0.253351	0.064	0.029	1.87154e-09	ciliary band	WHL22.471822	Sp-Tk1	thymidine kinase, cytosolic (LOC579588), mRNA	SPU_008879	thymidine kinase activity; ATP binding	Thymidine kinase	Metabolism_Nucleotide
2.37739e-13	0.256748	0.148	0.089	3.70373e-09	ciliary band	WHL22.547132	Sp-C3orf20L	uncharacterized LOC100891346 (LOC100891346), mRNA	SPU_019923	NA	FAM194 protein; Mitochondrial 28S ribosomal protein S32	Translation_RibosomalProtein
2.43648e-13	0.280701	0.22	0.149	3.79579e-09	ciliary band	WHL22.733460	Sp-Oda/LC7L1	dynein light chain roadblock-type 2-like (LOC100890740), mRNA	SPU_008699	NA	Roadblock/LC7 domain	Cytoskeleton_Dynein
6.1099e-13	0.331153	0.213	0.146	9.51861e-09	ciliary band	WHL22.65641	Sp-Ranbp1	ran-specific GTPase-activating protein (LOC587798), transcript variant X2, mRNA	SPU_025814	intracellular transport	RanBP1 domain	NA
9.13159e-13	0.298295	0.198	0.131	1.42261e-08	ciliary band	WHL22.250276	Sp-Hsp90L	heat shock protein 83 (LOC582860), mRNA	SPU_024082	protein folding; response to stress; ATP binding; unfolded protein binding	Hsp90 protein	Defensome_HSP
1.02355e-12	0.306299	0.181	0.12	1.59458e-08	ciliary band	WHL22.32592	Sp-Hypp_1369	protein FAM228B (LOC582953), mRNA	SPU_002097	NA	NA	NA
1.56494e-12	0.258394	0.049	0.02	2.43802e-08	ciliary band	WHL22.739581	Sp-Nkx2.1	homeodomain protein NK2.1 (NK2.1), transcript variant X1, mRNA	SPU_000757	regulation of transcription; DNA-templated; DNA binding; sequence-specific DNA binding transcription factoractivity; sequence-specific DNA binding; nucleus	Homeodomain	Nervous_TF
1.77109e-12	0.286555	0.086	0.045	2.75917e-08	ciliary band	WHL22.388450	Sp-C10orf134L	enolase-like protein ENO4 (LOC583138), mRNA	SPU_000632	glycolytic process; magnesium ion binding; phosphopyruvate hydratase activity; phosphopyruvate hydratase complex	Enolase, C-terminal TIM barrel domain; Enolase, N-terminal domain	Metabolism_Carbohydrate
2.44011e-12	0.31774	0.096	0.052	3.80145e-08	ciliary band	WHL22.642319	Sp-Top2a	DNA topoisomerase 2-alpha (LOC582001), mRNA	SPU_018730	DNA metabolic process; DNA topological change; DNA binding; DNA topoisomerase type II (ATP-hydrolyzing) activity; ATP binding; nucleus	DNA gyrase/topoisomerase IV, subunit A; DTHCT (NUC029) region	Isomerase
2.87904e-12	0.283342	0.183	0.121	4.48526e-08	ciliary band	WHL22.659393	Sp-Prxdxn	peroxiredoxin (LOC581408), mRNA	SPU_014869	oxidation-reduction process; antioxidant activity; oxidoreductase activity; peroxiredoxin activity	AhpC/TSA family; C-terminal domain of 1-Cys peroxiredoxin; Redoxin	Defensome_Antioxidant
2.88978e-12	0.320652	0.124	0.074	4.50199e-08	ciliary band	WHL22.474443	SPU_004658; Sp-Mcm7	DNA replication licensing factor mcm7-A (LOC574771), transcript variant X2, mRNA	SPU_004658; SPU_026450	DNA replication; DNA replication initiation; DNA binding; DNA helicase activity; ATP binding; nucleus; MCM complex	MCM AAA-lid domain	ATPase
4.98111e-12	0.254927	0.128	0.076	7.76008e-08	ciliary band	WHL22.697137	Sp-Hypp_917	cilia- and flagella-associated protein 99 (LOC584073), mRNA	SPU_018566	NA	NA	NA
5.39393e-12	0.272756	0.133	0.081	8.4032e-08	ciliary band	WHL22.232170	SPU_016156	uncharacterized LOC592629 (LOC592629), mRNA	SPU_016156	NA	NA	NA
5.96723e-12	0.308707	0.092	0.05	9.29635e-08	ciliary band	WHL22.348341	SPU_002149	origin recognition complex subunit 1 (LOC594443), mRNA	SPU_002149	chromatin binding	NA	Unclassified
6.86088e-12	0.251931	0.047	0.02	1.06886e-07	ciliary band	WHL22.248712	Sp-Hypp_1545	uncharacterized LOC100892394 (LOC100892394), mRNA	SPU_004819	NA	NA	NA
1.03762e-11	0.299679	0.076	0.038	1.6165e-07	ciliary band	WHL22.634425	Sp-Pcm1	pericentriolar material 1 protein (LOC581113), transcript variant X2, mRNA	SPU_025427	binding	Pericentriolar material 1 C terminus	NA
1.12965e-11	0.300965	0.151	0.096	1.75988e-07	ciliary band	WHL22.187923	SPU_006495	glutathione S-transferase theta-1 (LOC593058), mRNA	SPU_006495	protein binding	Glutathione S-transferase, N-terminal domain; Glutathione S-transferase, N-terminal domain; Glutathione S-transferase, C-terminal domain	Transferase
1.41917e-11	0.309061	0.067	0.033	2.21093e-07	ciliary band	WHL22.584483	Sp-Nasp	nuclear histone binding protein (LOC373260), mRNA	SPU_012393	protein binding	SHNi-TPR	Unclassified
3.43923e-11	0.297416	0.084	0.046	5.35797e-07	ciliary band	WHL22.509216	SPU_010725; SPU_028374	uncharacterized LOC105445162 (LOC105445162), ncRNA	SPU_010725; SPU_028374	NA	NA	NA
3.65138e-11	0.258733	0.211	0.148	5.68849e-07	ciliary band	WHL22.696624	Sp-Rib43A	RIB43A-like with coiled-coils protein 2 (LOC586351), mRNA	SPU_027579	NA	RIB43A	Cytoskeleton_MicrotubuleAssociated
4.58025e-11	0.33072	0.108	0.063	7.13557e-07	ciliary band	WHL22.45548	SPU_016613; SPU_021343	uncharacterized LOC575348 (LOC575348), mRNA	SPU_016613; SPU_021343	NA	NA	NA
5.50723e-11	0.270211	0.11	0.065	8.57972e-07	ciliary band	WHL22.639203	Sp-SnrpE; Sp-SnrpE_1	small nuclear ribonucleoprotein polypeptide E-like (LOC580958), mRNA	SPU_019147; SPU_021883	mRNA splicing; via spliceosome; spliceosomal complex	LSM domain	Unclassified
8.30016e-11	0.318604	0.192	0.134	1.29308e-06	ciliary band	WHL22.343742	Sp-C2orf77L	coiled-coil domain-containing protein 173 (LOC582259), mRNA	SPU_004882	NA	Trichohyalin-plectin-homology domain	NA
9.15248e-11	0.27731	0.099	0.056	1.42586e-06	ciliary band	WHL22.268265	Sp-Ccdc149	protein FAM53A (LOC100887882), mRNA	SPU_025247	NA	Uncharacterized coiled-coil protein (DUF2353)	Homolog-of-gene-with-unknown-function
1.07343e-10	0.282981	0.151	0.099	1.67229e-06	ciliary band	WHL22.290510	Sp-Mitosin; Sp-Odadc1L	centromere protein F (LOC592172), mRNA	SPU_013508; SPU_013509	NA	Cenp-F N-terminal domain; Septation ring formation regulator, EzrA	Chromosome_CentromereBinding
1.24657e-10	0.292062	0.118	0.073	1.94204e-06	ciliary band	WHL22.299008	Sp-Ttll3	NA	SPU_019570	cellular protein modification process	Tubulin-tyrosine ligase family	Ligase
1.72099e-10	0.278676	0.067	0.034	2.68113e-06	ciliary band	WHL22.472720	SPU_016270	glutathione S-transferase theta-1 (LOC588420), mRNA	SPU_016270	protein binding	Glutathione S-transferase, N-terminal domain; Glutathione S-transferase, N-terminal domain	Transferase
1.77392e-10	0.25418	0.077	0.041	2.76359e-06	ciliary band	WHL22.453366	Sp-Slc25a42L	uncharacterized LOC576686 (LOC576686), mRNA	SPU_002966	transmembrane transport	Mitochondrial carrier protein	Metabolism_Energy
2.62189e-10	0.310127	0.1	0.059	4.08464e-06	ciliary band	WHL22.755786	Sp-E2f7	transcription factor E2F7 (LOC100891325), mRNA	SPU_023346	regulation of transcription; DNA-templated; sequence-specific DNA binding transcription factor activity; transcription factor complex	E2F/DP family winged-helix DNA-binding domain; Sugar-specific transcriptional regulator TrmB	Transcription_Regulation
3.18859e-10	0.383757	0.178	0.126	4.9675e-06	ciliary band	WHL22.229763	Sp-Tpx2L1; Sp-Tpx2L2	targeting protein for Xklp2 homolog (LOC593807), mRNA	SPU_008221; SPU_022897	mitosis; spindle; microtubule	Cell cycle regulated microtubule associated protein; Targeting protein for Xklp2 (TPX2)	Cytoskeleton_MicrotubuleAssociated
5.22457e-10	0.304482	0.157	0.107	8.13936e-06	ciliary band	WHL22.16165	Sp-Lrrc50-2; Sp-Lrrc50	dynein assembly factor 1, axonemal (LOC100892694), mRNA	SPU_006519; SPU_013321	motile cilium assembly; protein binding	Leucine-rich repeat; Leucine Rich repeats (2 copies); Leucine rich repeat	Unclassified
6.95209e-10	0.275538	0.091	0.052	1.08307e-05	ciliary band	WHL22.282838	WHL22.282838	uncharacterized LOC105437969 (LOC105437969), transcript variant X2, ncRNA	NA	NA	NA	NA
7.14717e-10	0.272846	0.108	0.066	1.11346e-05	ciliary band	WHL22.530550	Sp-Pold3	DNA polymerase delta subunit 3 (LOC586784), mRNA	SPU_006134	DNA replication; nucleus	DNA polymerase subunit Cdc27	DNA_Replication
7.25635e-10	0.2851	0.158	0.107	1.13047e-05	ciliary band	WHL22.737638	SPU_025490	uncharacterized LOC577613 (LOC577613), mRNA	SPU_025490	NA	NA	NA
2.89414e-09	0.252933	0.293	0.231	4.50879e-05	ciliary band	WHL22.636516	SPU_010239	uncharacterized protein C17orf105 homolog (LOC577213), mRNA	SPU_010239	NA	KIAA1430 homologue	NA
5.30323e-09	0.299274	0.151	0.104	8.2619e-05	ciliary band	WHL22.547371	Sp-Ccdc105	coiled-coil domain-containing protein 105 (LOC575169), mRNA	SPU_002424	microtubule cytoskeleton organization; microtubule	Tektin family	NA
1.89511e-08	0.275953	0.173	0.124	0.000295239	ciliary band	WHL22.682702	Sp-Ing4	inhibitor of growth protein 4 (LOC589170), mRNA	SPU_006666	negative regulation of cell proliferation; chromatin modification; histone acetylation; protein binding; zinc ion binding; nucleus; MOZ/MORF histone acetyltransferase complex	Inhibitor of growth proteins N-terminal histone-binding; PHD-finger	NA
3.33451e-08	0.26993	0.11	0.071	0.000519483	ciliary band	WHL22.560769	SPU_021594	IQ and AAA domain-containing protein 1-like (LOC592080), partial mRNA	SPU_021594	NA	NA	NA
7.62821e-08	0.263407	0.123	0.083	0.0011884	ciliary band	WHL22.485754	Sp-Ccdc11	cilia- and flagella-associated protein 53 (LOC586508), mRNA	SPU_010728	NA	Trichohyalin-plectin-homology domain	NA
9.59848e-08	0.273189	0.177	0.132	0.00149535	ciliary band	WHL22.387684	Sp-Hypp_1205	uncharacterized LOC587576 (LOC587576), mRNA	SPU_027515	NA	Testis-specific gene 13 protein	NA
2.22378e-07	0.268521	0.128	0.089	0.00346443	ciliary band	WHL22.63747	Sp-Smc4; SPU_014706	structural maintenance of chromosomes protein 4 (LOC592992), mRNA	SPU_013617; SPU_014706	chromosome organization; protein binding; ATP binding; chromosome	RecF/RecN/SMC N terminal domain; SMC proteins Flexible Hinge Domain; AAA domain, putative AbiEii toxin, Type IV TA system	CellCycle
2.62296e-07	0.272035	0.057	0.031	0.0040863	ciliary band	WHL22.553	Sp-Lefty	lefty (LOC577374), mRNA	SPU_009911	cell growth; growth; transforming growth factor beta receptor binding; growth factor activity	TGF-beta propeptide; Transforming growth factor beta like domain	Signaling_TGFB_Ligand
2.33719e-06	0.2791	0.201	0.162	0.0364111	ciliary band	WHL22.420899	Sp-Ccdc37	coiled-coil domain-containing protein 37 (LOC581889), mRNA	SPU_021034	NA	Domain of unknown function (DUF4200)	NA
6.16108e-06	0.285423	0.084	0.056	0.0959834	ciliary band	WHL22.6678	Sp-Uhfr1	E3 ubiquitin-protein ligase UHRF1 (LOC586739), transcript variant X3, mRNA	SPU_020441	protein binding; zinc ion binding; histone binding	Tandem tudor domain within UHRF1; SAD/SRA domain; PHD-finger	NA
5.72935e-05	0.256704	0.226	0.193	0.892576	ciliary band	WHL22.700700	SPU_005646; SPU_011989; Sp-Ccdc19; SPU_020236	cilia- and flagella-associated protein 45 (LOC591735), mRNA	SPU_005646; SPU_011989; SPU_014083; SPU_020236	NA	Trichohyalin-plectin-homology domain	NA
0	2.00104	0.726	0.089	0	apical plate	WHL22.194074	Sp-Lamg1f_2	laminin subunit gamma-1-like (LOC100888637), mRNA	SPU_006557	NA	Laminin N-terminal (Domain VI)	Adhesion_Laminin
7.80977e-243	1.52622	0.389	0.039	1.21668e-238	apical plate	WHL22.476856	WHL22.476856	NA	NA	NA	NA	NA
3.80066e-227	1.47563	0.415	0.048	5.92105e-223	apical plate	WHL22.282838	WHL22.282838	uncharacterized LOC105437969 (LOC105437969), transcript variant X2, ncRNA	NA	NA	NA	NA
3.47817e-172	1.14036	0.281	0.028	5.41864e-168	apical plate	WHL22.443690	SPU_025688; Sp-Siahbp1	poly(U)-binding-splicing factor PUF60 (LOC580419), transcript variant X5, mRNA	SPU_025688; SPU_025689	NA	NA	NA
6.32764e-164	1.52179	0.653	0.159	9.85783e-160	apical plate	WHL22.331108	Sp-Otof	otoferlin (LOC588154), mRNA	SPU_001799	protein binding	C2 domain; FerI (NUC094) domain	Unclassified
7.08925e-163	1.25418	0.382	0.054	1.10443e-158	apical plate	WHL22.544760	Sp-Hypp_286	luc7-like protein 3 (LOC585610), mRNA	SPU_028508	NA	NA	NA
3.31306e-142	1.00604	0.234	0.023	5.16142e-138	apical plate	WHL22.771234	Sp-Nr1h6b	oxysterols receptor LXR-beta (LOC577397), transcript variant X2, mRNA	SPU_015456	regulation of transcription; DNA-templated; steroid hormone mediated signaling pathway; DNA binding; sequence-specific DNA binding transcription factoractivity; steroid hormone receptor activity; zinc ion binding; sequence-specific DNA binding; nucleus	Zinc finger, C4 type (two domains); Ligand-binding domain of nuclear hormone receptor	Defensome_ReceptorTF
1.23136e-141	0.77895	0.128	0.007	1.91833e-137	apical plate	WHL22.403499	SPU_008566	putative methyltransferase DDB_G0268948 (LOC100888493), mRNA	SPU_008566	metabolic process; methyltransferase activity	Methyltransferase domain; Methyltransferase domain; Methyltransferase domain	Transferase
1.76353e-140	0.949295	0.206	0.018	2.7474e-136	apical plate	WHL22.720614	Sp-Lim1	Lim homeodomain transcription factor 1 (Lim1), mRNA	SPU_006991	regulation of transcription; DNA-templated; DNA binding; sequence-specific DNA binding transcription factoractivity; zinc ion binding; sequence-specific DNA binding; nucleus	LIM domain; Homeodomain	Nervous_TF
2.2869e-132	1.16194	0.304	0.042	3.56276e-128	apical plate	WHL22.126978	Sp-Zhangfei	probable basic-leucine zipper transcription factor Q (LOC764243), transcript variant X3, misc_RNA	SPU_012648	regulation of transcription; DNA-templated; sequence-specific DNA binding transcription factor activity; sequence-specific DNA binding	bZIP transcription factor	NA
2.74472e-132	1.30931	0.704	0.219	4.276e-128	apical plate	WHL22.538507	Sp-Nfat	nuclear factor of activated T-cells 5 (LOC590859), transcript variant X2, mRNA	SPU_015908	regulation of transcription; DNA-templated; sequence-specific DNA binding transcription factor activity; protein binding; nucleus	Rel homology dimerisation domain; Rel homology DNA-binding domain; IPT/TIG domain	CalciumToolkit
1.06807e-130	1.01476	0.259	0.031	1.66395e-126	apical plate	WHL22.738545	SPU_012616; Sp-Rhogef17; Sp-Hypp_232; SPU_027997	rho guanine nucleotide exchange factor 17 (LOC590980), mRNA	SPU_012616; SPU_020022; SPU_025618; SPU_027997	regulation of Rho protein signal transduction; Rho guanyl-nucleotide exchange factor activity	RhoGEF domain	Unclassified
3.32326e-125	1.20369	0.44	0.089	5.17731e-121	apical plate	WHL22.755846	SPU_025481; Sp-Ash1	uncharacterized LOC579712 (LOC579712), transcript variant X6, mRNA	SPU_025481; SPU_025482	NA	NA	NA
5.16414e-125	1.1194	0.274	0.036	8.04521e-121	apical plate	WHL22.10659	WHL22.10659	uncharacterized LOC100893635 (LOC100893635), ncRNA	NA	NA	NA	NA
3.4584e-119	1.01913	0.264	0.035	5.38784e-115	apical plate	WHL22.382468	Sp-Reeler/Egf/Cub_1	fibropellin-3 (LOC100891955), mRNA	SPU_026550	calcium ion binding; protein binding	EGF-like domain; Human growth factor-like EGF; Calcium-binding EGF domain	Unclassified
4.13866e-118	0.719099	0.176	0.016	6.44762e-114	apical plate	WHL22.471417	WHL22.471417	uncharacterized LOC100889885 (LOC100889885), mRNA	NA	NA	NA	NA
7.34592e-117	1.04122	0.269	0.037	1.14442e-112	apical plate	WHL22.494265	Sp-Mapkbp1L; Sp-Mapkbp1L_1; Sp-Hypp_3041; SPU_020312	mitogen-activated protein kinase-binding protein 1 (LOC576108), mRNA	SPU_014846; SPU_018780; SPU_018781; SPU_020312	protein binding	WD domain, G-beta repeat; Anaphase-promoting complex subunit 4 WD40 domain; Protein of unknown function (DUF1067)	Unclassified
6.26675e-115	0.978303	0.221	0.026	9.76297e-111	apical plate	WHL22.615277	WHL22.615277	uncharacterized LOC100890048 (LOC100890048), mRNA	NA	NA	NA	NA
1.81086e-114	0.949904	0.244	0.031	2.82114e-110	apical plate	WHL22.592635	WHL22.592635	general transcriptional corepressor CYC8-like (LOC105446134), partial mRNA	NA	NA	NA	NA
8.98792e-110	1.12374	0.367	0.07	1.40023e-105	apical plate	WHL22.299008	Sp-Ttll3	NA	SPU_019570	cellular protein modification process	Tubulin-tyrosine ligase family	Ligase
5.42749e-108	1.18231	0.56	0.154	8.45549e-104	apical plate	WHL22.620148	Sp-AnL2; Sp-AnL3; Sp-AnL4; Sp-MeprinAaL	protein SpAN (LOC593467), transcript variant X2, misc_RNA	SPU_004115; SPU_004116; SPU_004117; SPU_030013	proteolysis; metalloendopeptidase activity; metallopeptidase activity; zinc ion binding	Astacin (Peptidase family M12A); CUB domain	Metalloprotease
3.88132e-106	0.793699	0.196	0.022	6.04671e-102	apical plate	WHL22.30972	Sp-Ttrspn_18	vesicular glutamate transporter 1 (LOC581383), mRNA	SPU_024362	transmembrane transport; integral component of membrane	Tetraspanin family; Major Facilitator Superfamily	Metabolism_Carbohydrate
4.21452e-100	0.816418	0.224	0.029	6.56581e-96	apical plate	WHL22.504951	Sp-Eggbr1L_1	hyalin-like (LOC105446087), mRNA	SPU_003635	protein binding	HYR domain; CUB domain; von Willebrand factor type D domain	BloodProtein
9.29034e-93	1.22796	0.405	0.097	1.44734e-88	apical plate	WHL22.286506	Sp-Hypp_1199	trichohyalin (LOC583635), transcript variant X1, mRNA	SPU_027307	NA	NA	NA
8.21274e-91	0.604663	0.108	0.008	1.27946e-86	apical plate	WHL22.649352	Sp-Hypp_1032	uncharacterized LOC105436417 (LOC105436417), mRNA	SPU_021913	zinc ion binding; membrane	Amyotrophic lateral sclerosis 2 chromosomal region candidate gene 8; MULE transposase domain	NA
8.24986e-91	1.15402	0.754	0.367	1.28524e-86	apical plate	WHL22.456851	Sp-Unk_89; Sp-Axndhc10h	dynein heavy chain 10, axonemal (LOC585218), partial mRNA	SPU_011876; SPU_030231	microtubule-based movement; microtubule motor activity; ATP binding; ATPase activity	Dynein heavy chain, N-terminal region 1; Hydrolytic ATP binding site of dynein motor region; Dynein heavy chain, N-terminal region 2	NA
1.17498e-87	0.817561	0.133	0.012	1.8305e-83	apical plate	WHL22.244976	Sp-Cub/TolloidL	dorsal-ventral patterning tolloid-like protein 1 (LOC578458), mRNA	SPU_010967	protein binding	CUB domain; Low-density lipoprotein receptor domain class A	Unclassified
2.81797e-87	1.23433	0.415	0.107	4.39012e-83	apical plate	WHL22.282889	Sp-MyIs4	myosin II (LOC373225), mRNA	SPU_024055	motor activity; ATP binding; myosin complex	Myosin head (motor domain); Myosin N-terminal SH3-like domain	Cytoskeleton_Myosin
3.40302e-87	0.730245	0.116	0.009	5.30157e-83	apical plate	WHL22.557081	SPU_001501	kinesin-like protein KIF19 (LOC585520), mRNA	SPU_001501	microtubule-based movement; microtubule motor activity; ATP binding; microtubule binding; kinesin complex	Kinesin motor domain; Microtubule binding	Unclassified
1.33013e-85	1.05268	0.231	0.036	2.0722e-81	apical plate	WHL22.17652	Sp-Snrk; Sp-Snrk_1; Sp-Hypp_993; SPU_028687	SNF-related serine/threonine-protein kinase (LOC580566), mRNA	SPU_000102; SPU_004413; SPU_020786; SPU_028687	protein phosphorylation; protein kinase activity; protein serine/threonine kinase activity; ATP binding; transferase activity; transferring phosphorus-containing groups	Protein kinase domain; Protein tyrosine kinase	NA
3.77448e-83	0.989296	0.274	0.051	5.88027e-79	apical plate	WHL22.472163	Sp-Unc44L_17	uncharacterized LOC754486 (LOC754486), mRNA	SPU_001685	protein binding	Ankyrin repeats (many copies); Ankyrin repeats (3 copies); Ankyrin repeats (many copies)	Unclassified
5.51755e-82	0.98177	0.359	0.083	8.59579e-78	apical plate	WHL22.98042	Sp-Cycl2; Sp-Cycl; Sp-Cycl1	cyclin-L1 (LOC585134), mRNA	SPU_000328; SPU_011295; SPU_014989	regulation of cyclin-dependent protein serine/threoninekinase activity; regulation of transcription; DNA-templated; RNA processing; protein kinase binding	NA	CellCycle
1.37253e-81	0.751154	0.183	0.024	2.13827e-77	apical plate	WHL22.144338	Sp-Tmem26L	uncharacterized LOC100893465 (LOC100893465), mRNA	SPU_025046	NA	Transmembrane protein 26	Transmembrane
7.02199e-81	0.785882	0.193	0.027	1.09396e-76	apical plate	WHL22.99441	WHL22.99441	major facilitator superfamily domain-containing protein 4-B-like (LOC100890611), mRNA	NA	NA	NA	NA
2.47948e-78	1.24576	0.432	0.129	3.86279e-74	apical plate	WHL22.767290	SPU_007262	forkhead box protein J2 (LOC100889858), mRNA	SPU_007262	regulation of transcription; DNA-templated; sequence-specific DNA binding transcription factor activity; sequence-specific DNA binding	Forkhead domain	TranscriptionFactor_Forkhead
2.4485e-77	0.511745	0.103	0.008	3.81451e-73	apical plate	WHL22.591474	Sp-Amt1	putative ammonium transporter 1 (LOC576563), transcript variant X1, mRNA	SPU_014403	ammonium transport; ammonium transmembrane transport; ammonium transmembrane transporter activity; membrane	Ammonium Transporter Family	Metabolism_InorganicIon
5.66003e-77	1.06684	0.412	0.112	8.81776e-73	apical plate	WHL22.568858	Sp-Mll4L; Sp-Trx2; Sp-Mll1L	uncharacterized LOC579728 (LOC579728), mRNA	SPU_015420; SPU_015421; SPU_022485	DNA binding; protein binding; zinc ion binding	PHD-finger; CXXC zinc finger domain	NA
5.56831e-76	0.748351	0.249	0.045	8.67487e-72	apical plate	WHL22.84915	Sp-Cdkl2	cyclin-dependent kinase-like 2 (LOC578803), mRNA	SPU_000563	protein phosphorylation; protein kinase activity; protein serine/threonine kinase activity; ATP binding; transferase activity; transferring phosphorus-containing groups	Protein kinase domain; Protein tyrosine kinase	Kinase_CMGC
2.49774e-74	0.745689	0.226	0.038	3.89122e-70	apical plate	WHL22.159801	WHL22.159801	doublesex- and mab-3-related transcription factor A2-like (LOC100888349), mRNA	NA	NA	NA	NA
1.84787e-73	1.01118	0.513	0.175	2.8788e-69	apical plate	WHL22.717117	Sp-Clspn2	nucleolin 2-like (LOC105437539), mRNA	SPU_006674	NA	NA	NA
2.95765e-73	0.470355	1	1	4.60773e-69	apical plate	WHL22.55201	Sp-Mt1	metallothionein a (MTa), misc_RNA	SPU_017989	metal ion binding	Metallothionein	Defensome_MetalDetoxification
4.67805e-73	0.624032	0.126	0.013	7.28793e-69	apical plate	WHL22.32201	SPU_018554; Sp-Cul4_2	cullin-4A (LOC592454), mRNA	SPU_018554; SPU_018555	ubiquitin-dependent protein catabolic process; ubiquitin protein ligase binding; cullin-RING ubiquitin ligase complex	Cullin family	Ubiquitin_Cullin
1.10948e-72	1.02926	0.382	0.103	1.72846e-68	apical plate	WHL22.553940	Sp-Hypp_766; Sp-Unk_85	msx2-interacting protein (LOC100889352), transcript variant X5, mRNA	SPU_014837; SPU_027786	NA	NA	NA
1.86364e-72	1.11604	0.332	0.083	2.90336e-68	apical plate	WHL22.591732	Sp-Maddl; Sp-Madd_1; Sp-Madd	MAP kinase-activating death domain protein-like (LOC105446437), transcript variant X1, mRNA	SPU_000089; SPU_015621; SPU_024838	NA	DENN (AEX-3) domain	Unclassified
1.07051e-71	0.770361	0.241	0.045	1.66775e-67	apical plate	WHL22.346355	Sp-Hypp_234	serine/arginine repetitive matrix protein 2 (LOC100887952), partial mRNA	SPU_025869	signal transduction; binding	Filopodia upregulated, FAM65	NA
7.57472e-71	1.25444	0.565	0.247	1.18007e-66	apical plate	WHL22.388135	Sp-Cdc14A; Sp-Cdc14A_1; SPU_028081	dual specificity protein phosphatase CDC14A (LOC576159), transcript variant X4, mRNA	SPU_015765; SPU_024659; SPU_028081	protein dephosphorylation; dephosphorylation; protein tyrosine phosphatase activity; protein tyrosine/serine/threonine phosphatase activity; phosphatase activity	Dual specificity protein phosphatase, N-terminal half; Dual specificity phosphatase, catalytic domain; Protein-tyrosine phosphatase	Phosphatase_Tyrosine
9.58206e-71	0.257832	0.058	0.003	1.49279e-66	apical plate	WHL22.76994	Sp-Kcna	uncharacterized LOC762602 (LOC762602), mRNA	SPU_025048	signal transduction; signal transducer activity	PAS domain	Channel_Potassium
1.56735e-69	0.958248	0.427	0.128	2.44177e-65	apical plate	WHL22.736504	Sp-Wdr86; SPU_026889	WD repeat-containing protein 86 (LOC100888294), mRNA	SPU_016147; SPU_026889	protein binding	WD domain, G-beta repeat; Anaphase-promoting complex subunit 4 WD40 domain; Nucleoporin Nup120/160	Unclassified
2.44034e-69	0.50011	0.118	0.012	3.8018e-65	apical plate	WHL22.658406	Sp-Mekk1_1	mitogen-activated protein kinase kinase kinase 1 (LOC590478), mRNA	SPU_027423	protein phosphorylation; protein kinase activity; protein serine/threonine kinase activity; protein binding; ATP binding; zinc ion binding; transferase activity; transferring phosphorus-containing groups	Protein kinase domain; Protein tyrosine kinase; Ring finger domain	Fertilization
1.10862e-66	1.02693	0.392	0.112	1.72713e-62	apical plate	WHL22.150420	Sp-Baz1b; Sp-Balz1b; Sp-Baz1bL	tyrosine-protein kinase BAZ1B (LOC585100), partial mRNA	SPU_003686; SPU_013195; SPU_020771	protein binding; zinc ion binding	Bromodomain; PHD-finger	NA
1.26332e-66	0.732503	0.163	0.023	1.96812e-62	apical plate	WHL22.131652	Sp-Clk2	dual specificity protein kinase CLK2 (LOC592598), transcript variant X1, mRNA	SPU_004639	protein phosphorylation; protein kinase activity; protein serine/threonine kinase activity; ATP binding; transferase activity; transferring phosphorus-containing groups	Protein kinase domain; Protein tyrosine kinase	Kinase_CMGC
2.3781e-66	0.802228	0.269	0.058	3.70484e-62	apical plate	WHL22.755786	Sp-E2f7	transcription factor E2F7 (LOC100891325), mRNA	SPU_023346	regulation of transcription; DNA-templated; sequence-specific DNA binding transcription factor activity; transcription factor complex	E2F/DP family winged-helix DNA-binding domain; Sugar-specific transcriptional regulator TrmB	Transcription_Regulation
1.14291e-65	0.379324	0.09	0.008	1.78054e-61	apical plate	WHL22.46001	WHL22.46001	uncharacterized LOC575097 (LOC575097), mRNA	NA	NA	NA	NA
1.42036e-64	0.465327	0.078	0.006	2.21278e-60	apical plate	WHL22.218681	WHL22.218681	NA	NA	NA	NA	NA
5.44414e-64	0.943182	0.322	0.082	8.48143e-60	apical plate	WHL22.684029	Sp-Ttll10L; Sp-Ttll10L_2	probable beta-tubulin polyglutamylase (LOC578816), mRNA	SPU_013744; SPU_013817	cellular protein modification process	Tubulin-tyrosine ligase family	Ligase
1.26447e-63	0.839559	0.211	0.039	1.96991e-59	apical plate	WHL22.302440	Sp-Hypp_3114; Sp-Hypp_3115; Sp-C3orf63L	uncharacterized LOC755431 (LOC755431), transcript variant X5, mRNA	SPU_001593; SPU_001594; SPU_008122	NA	NA	NA
1.50314e-63	0.580881	0.101	0.01	2.34175e-59	apical plate	WHL22.256199	WHL22.256199	zinc finger protein 84-like (LOC100891941), transcript variant X1, mRNA	NA	NA	NA	NA
2.45957e-63	0.960381	0.324	0.086	3.83177e-59	apical plate	WHL22.769472	Sp-C1orf173L	glutamate-rich protein 3 (LOC590109), transcript variant X3, mRNA	SPU_020097	NA	Domain of unknown function (DUF4590); Leucine Rich repeat	NA
4.11033e-63	0.671894	0.178	0.029	6.40348e-59	apical plate	WHL22.503292	Sp-Pif1h	uncharacterized LOC105443208 (LOC105443208), ncRNA	SPU_000082	telomere maintenance; DNA repair; nucleotide binding; DNA helicase activity; protein binding; nucleoside-triphosphatase activity	Helitron helicase-like domain at N-terminus; PIF1-like helicase; Herpesvirus tegument protein, N-terminal conserved region	NA
7.82653e-63	0.958074	0.274	0.062	1.21929e-58	apical plate	WHL22.367199	Sp-Sr140; SPU_022128	U2 snRNP-associated SURP motif-containing protein (LOC589574), mRNA	SPU_019657; SPU_022128	RNA processing; nucleotide binding; nucleic acid binding; RNA binding	Surp module; RNA recognition motif. (a.k.a. RRM, RBD, or RNP domain); cwf21 domain	NA
2.10636e-62	0.61047	0.118	0.013	3.28151e-58	apical plate	WHL22.169339	SPU_001013	uncharacterized LOC580838 (LOC580838), mRNA	SPU_001013	NA	NA	NA
3.02337e-62	0.998509	0.322	0.086	4.71011e-58	apical plate	WHL22.87433	WHL22.87433	centrosome and spindle pole-associated protein 1 (LOC764794), mRNA	NA	NA	NA	NA
7.35593e-61	0.257638	0.055	0.003	1.14598e-56	apical plate	WHL22.476606	Sp-Shc1_1	NA	SPU_002474	protein binding	SH2 domain	Unclassified
3.09589e-59	0.755006	0.158	0.025	4.82308e-55	apical plate	WHL22.432910	Sp-Hypp_424; Sp-Hypp_985	putative leucine-rich repeat-containing protein DDB_G0290503 (LOC589102), mRNA	SPU_004674; SPU_020691	signal transduction; protein binding	Ras association (RalGDS/AF-6) domain; SAM domain (Sterile alpha motif); SAM domain (Sterile alpha motif)	NA
3.90731e-59	0.911796	0.349	0.1	6.0872e-55	apical plate	WHL22.765838	Sp-Gldc	glycine dehydrogenase (decarboxylating), mitochondrial (LOC578453), mRNA	SPU_027673	glycine metabolic process; glycine catabolic process; oxidation-reduction process; catalytic activity; glycine dehydrogenase (decarboxylating) activity; pyridoxal phosphate binding	Glycine cleavage system P-protein; Beta-eliminating lyase	Metabolism_AminoAcid
1.1557e-58	0.486464	0.108	0.012	1.80047e-54	apical plate	WHL22.184243	SPU_009083	centrosomal protein of 162 kDa (LOC100891235), mRNA	SPU_009083	NA	NA	NA
1.22762e-58	0.73397	0.201	0.038	1.91251e-54	apical plate	WHL22.761246	Sp-Pkd2	polycystic kidney disease protein 2 (pkd2), mRNA	SPU_010579	calcium ion binding; membrane	Polycystin cation channel; Ion transport protein; Ferredoxin I 4Fe-4S cluster domain	CalciumToolkit
4.83116e-57	0.789607	0.322	0.088	7.52646e-53	apical plate	WHL22.480593	Sp-Furin_1	ATP-binding cassette sub-family B member 9-like (LOC105445745), mRNA	SPU_028030	proteolysis; transport; transmembrane transport; serine-type endopeptidase activity; ATP binding; ATPase activity; coupled to transmembrane movement ofsubstances; integral component of membrane	Proprotein convertase P-domain; Subtilase family; ABC transporter transmembrane region	Signaling_TGFB_Modulator
1.2802e-56	1.36695	0.503	0.228	1.99443e-52	apical plate	WHL22.675865	SPU_008693	arginine and glutamate-rich protein 1 (LOC588600), mRNA	SPU_008693	NA	Arginine and glutamate-rich 1	NA
1.81795e-56	0.563839	0.133	0.018	2.83218e-52	apical plate	WHL22.308748	Sp-Gpc1246	glypican-6 (gpc-6), mRNA	SPU_005979	heparan sulfate proteoglycan binding; proteinaceous extracellular matrix; membrane	Glypican	Adhesion_Proteoglycan
4.97071e-56	0.963868	0.196	0.038	7.74387e-52	apical plate	WHL22.543099	Sp-Fnbp4L	formin-binding protein 4 (LOC577901), transcript variant X2, mRNA	SPU_005303	protein binding	WW domain	Unclassified
1.75732e-55	0.783347	0.291	0.075	2.73773e-51	apical plate	WHL22.642838	Sp-Htatsf1L_1; Sp-Htatsf1L; Sp-Htatsf1L_2	HIV Tat-specific factor 1 (LOC762444), mRNA	SPU_009456; SPU_010689; SPU_015881	nucleotide binding; nucleic acid binding	RNA recognition motif. (a.k.a. RRM, RBD, or RNP domain)	Unclassified
2.81672e-55	0.487663	0.083	0.008	4.38817e-51	apical plate	WHL22.445970	Sp-Zdhhc5	palmitoyltransferase ZDHHC5 (LOC100889536), transcript variant X1, mRNA	SPU_012516	zinc ion binding	DHHC palmitoyltransferase	NA
3.19606e-55	0.606174	0.121	0.016	4.97914e-51	apical plate	WHL22.89422	Sp-Diaph_1; Sp-Diaph	protein diaphanous homolog 2 (LOC592122), mRNA	SPU_012710; SPU_020879	actin cytoskeleton organization; actin binding; binding; Rho GTPase binding	Diaphanous GTPase-binding Domain	Cytoskeleton_MicrotubuleAssociated
4.96917e-55	0.862285	0.269	0.068	7.74147e-51	apical plate	WHL22.60716	Sp-C21orf66L	PAX3- and PAX7-binding protein 1 (LOC581071), mRNA	SPU_012736	regulation of transcription; DNA-templated; DNA binding; sequence-specific DNA binding transcription factoractivity; nucleus	GC-rich sequence DNA-binding factor-like protein	NucleicAcid_Binding
1.29909e-54	0.475564	0.111	0.013	2.02386e-50	apical plate	WHL22.109244	SPU_004559	hyalin-like (LOC105446087), mRNA	SPU_004559	NA	NA	NA
1.75951e-54	0.595436	0.163	0.028	2.74114e-50	apical plate	WHL22.301908	Sp-Glcci1L	protein FAM117B (LOC100888750), transcript variant X1, mRNA	SPU_022103	NA	Protein Family FAM117	NA
2.12284e-54	0.715851	0.178	0.032	3.30717e-50	apical plate	WHL22.298210	WHL22.298210	G patch domain-containing protein 1 (LOC100890101), mRNA	NA	NA	NA	NA
4.32149e-54	0.812124	0.216	0.046	6.73245e-50	apical plate	WHL22.62937	Sp-Pi3kp110_2	phosphatidylinositol 4,5-bisphosphate 3-kinase catalytic subunit alpha isoform (LOC100887997), mRNA	SPU_006197	phosphatidylinositol phosphorylation; phosphatidylinositol-mediated signaling	PI3-kinase family, p85-binding domain	CalciumToolkit
5.84072e-54	0.86022	0.342	0.101	9.09926e-50	apical plate	WHL22.597391	Sp-Klhl7L	kelch-like protein 8 (LOC575978), mRNA	SPU_010986	protein binding	Kelch motif; Kelch motif; BTB/POZ domain	Unclassified
1.49893e-53	0.797937	0.384	0.122	2.33518e-49	apical plate	WHL22.547466	Sp-Hypp_1006	neurofilament heavy polypeptide (LOC579862), mRNA	SPU_020958	NA	NA	NA
4.76561e-53	0.738555	0.211	0.044	7.42434e-49	apical plate	WHL22.635935	Sp-Egf/Ig/Lnb/Tm7/Gpcr; Sp-Egf/Ig/Lnb/7Tm/Gpcr	uncharacterized LOC583016 (LOC583016), transcript variant X1, mRNA	SPU_007742; SPU_026092	cell surface receptor signaling pathway; G-protein coupled receptor signaling pathway; neuropeptide signaling pathway; transmembrane signaling receptor activity; G-protein coupled receptor activity; calcium ion binding; protein binding; membrane; integral component of membrane	Calcium-binding EGF domain; EGF domain; MSP1 EGF domain 1	Adhesion_GPCR
5.67932e-53	0.354039	0.083	0.008	8.84781e-49	apical plate	WHL22.443525	Sp-Pi4kb; SPU_025894	phosphatidylinositol 4-kinase beta (LOC100891136), mRNA	SPU_016172; SPU_025894	phosphatidylinositol biosynthetic process; phosphatidylinositol phosphorylation; phosphatidylinositol-mediated signaling; 1-phosphatidylinositol 4-kinase activity; transferase activity; transferring phosphorus-containing groups; phosphotransferase activity; alcohol group as acceptor	Phosphatidylinositol 3- and 4-kinase	NA
7.311e-53	1.05647	0.178	0.034	1.13898e-48	apical plate	WHL22.277196	Sp-PolypL_963; Sp-PolypL	uncharacterized LOC105442352 (LOC105442352), ncRNA	SPU_005586; SPU_005587	NA	GDSL-like Lipase/Acylhydrolase family; Reverse transcriptase (RNA-dependent DNA polymerase)	NA
1.04885e-52	1.23285	0.422	0.163	1.63401e-48	apical plate	WHL22.27015	Sp-Dnah7_1; Sp-Dnah7; Sp-Axndhc7h	dynein heavy chain 7, axonemal (LOC581061), transcript variant X1, mRNA	SPU_015049; SPU_018343; SPU_030228	cilium movement; microtubule-based movement; microtubule motor activity; calcium ion binding; ATPase activity; axonemal dynein complex	Hydrolytic ATP binding site of dynein motor region; Dynein heavy chain, N-terminal region 2; P-loop containing dynein motor region	NA
2.76348e-52	0.350414	0.085	0.008	4.30523e-48	apical plate	WHL22.424996	Sp-Sim; Sp-Sim_1	single-minded homolog 2 (LOC577676), transcript variant X1, mRNA	SPU_008353; SPU_013962	regulation of transcription; DNA-templated; cellular protein modification process; signal transduction; catalytic activity; signal transducer activity	Biotin/lipoate A/B protein ligase family; PAS fold; PAS domain	Signaling_Notch
3.63957e-52	0.631495	0.131	0.019	5.67009e-48	apical plate	WHL22.8014	Sp-Trpc3	short transient receptor potential channel 4 (LOC586872), transcript variant X1, mRNA	SPU_012792	ion transport; transmembrane transport; calcium ion transmembrane transport; ion channel activity; calcium channel activity; protein binding; membrane	Ion transport protein; Transient receptor ion channel II; Ankyrin repeats (3 copies)	CalciumToolkit
3.71787e-52	0.270218	0.05	0.003	5.79208e-48	apical plate	WHL22.266822	Sp-Gaa	lysosomal alpha-glucosidase (LOC590773), mRNA	SPU_027650	carbohydrate metabolic process; catalytic activity; hydrolase activity; hydrolyzing O-glycosyl compounds; carbohydrate binding	Glycosyl hydrolases family 31; N-terminal barrel of NtMGAM and CtMGAM, maltase-glucoamylase; Galactose mutarotase-like	Hydrolase
4.60296e-51	0.717216	0.196	0.04	7.17095e-47	apical plate	WHL22.662846	SPU_007994; Sp-Syne1	nesprin-1-like (LOC105437706), mRNA	SPU_007994; SPU_013237	actin binding; protein binding	Calponin homology (CH) domain	NA
5.89284e-51	0.323487	0.075	0.007	9.18046e-47	apical plate	WHL22.99475	Sp-Pfkfb1	6-phosphofructo-2-kinase/fructose-2,6-bisphosphatase 1-like (LOC764086), mRNA	SPU_002649	fructose metabolic process; fructose 2;6-bisphosphate metabolic process; metabolic process; catalytic activity; 6-phosphofructo-2-kinase activity; fructose-2;6-bisphosphate 2-phosphatase activity; ATP binding	6-phosphofructo-2-kinase; Histidine phosphatase superfamily (branch 1); AAA domain	Metabolism_Carbohydrate
6.59527e-51	0.914683	0.49	0.203	1.02748e-46	apical plate	WHL22.441448	Sp-Srrm2	serine/arginine repetitive matrix protein 2 (LOC584224), transcript variant X3, mRNA	SPU_010979	NA	cwf21 domain; Serine/arginine repetitive matrix protein C-terminus	NucleicAcid_RNA-Processing
7.97199e-51	0.890659	0.387	0.134	1.24196e-46	apical plate	WHL22.691481	Sp-Ttll11; Sp-Ttll11_1	tubulin polyglutamylase TTLL11 (LOC574605), mRNA	SPU_001978; SPU_003183	cellular protein modification process	Tubulin-tyrosine ligase family; Sugar-transfer associated ATP-grasp; YheC/D like ATP-grasp	Ligase
9.01115e-51	0.541688	0.08	0.008	1.40385e-46	apical plate	WHL22.91457	SPU_018793	NA	SPU_018793	NA	NA	NA
1.0089e-50	0.648321	0.151	0.025	1.57177e-46	apical plate	WHL22.128732	Sp-Sfrs16; Sp-Sfrs16_1	CLK4-associating serine/arginine rich protein (LOC575373), transcript variant X1, mRNA	SPU_017377; SPU_022855	NA	NA	NucleicAcid_RNA-Processing
1.3425e-50	0.753986	0.214	0.047	2.09147e-46	apical plate	WHL22.268154	Sp-Ski_1; Sp-Ski	ski oncogene (LOC592889), mRNA	SPU_002160; SPU_010659	NA	NA	NA
3.04864e-50	0.751675	0.183	0.037	4.74948e-46	apical plate	WHL22.491357	Sp-gagpolL_15; Sp-PolppL-5; Sp-PolppL-6; Sp-PolppL-7; Sp-PolppL-8; Sp-PolppL-9; Sp-PolppL_10	uncharacterized LOC100893771 (LOC100893771), mRNA	SPU_001809; SPU_001810; SPU_001811; SPU_001812; SPU_001813; SPU_001814; SPU_001815	NA	Pao retrotransposon peptidase; Family of unknown function (DUF5641); Integrase core domain	NA
9.67827e-50	0.267495	0.048	0.003	1.50778e-45	apical plate	WHL22.468753	WHL22.468753	uncharacterized LOC100893374 (LOC100893374), mRNA	NA	NA	NA	NA
1.50548e-49	0.861163	0.372	0.123	2.34538e-45	apical plate	WHL22.211896	Sp-Ttc16	tetratricopeptide repeat protein 16 (LOC587891), mRNA	SPU_010186	protein binding	Tetratricopeptide repeat; Tetratricopeptide repeat; TPR repeat	Unclassified
2.40383e-49	0.491342	0.128	0.019	3.74493e-45	apical plate	WHL22.408494	SPU_026075; Sp-A2bp1	RNA binding protein fox-1 homolog 3 (LOC100890824), transcript variant X8, mRNA	SPU_026075; SPU_026076	NA	NA	NA
3.09761e-49	0.982109	0.291	0.084	4.82576e-45	apical plate	WHL22.104346	Sp-Cnot1_5	CCR4-NOT transcription complex subunit 1-like (LOC105439049), transcript variant X1, mRNA	SPU_005616	NA	CCR4-NOT transcription complex subunit 1 HEAT repeat	NA
3.69011e-49	0.384686	0.073	0.007	5.74882e-45	apical plate	WHL22.596347	Sp-PtprB	tyrosine-protein phosphatase 10D (LOC100892813), mRNA	SPU_026259	protein dephosphorylation; protein tyrosine phosphatase activity	Protein-tyrosine phosphatase	Phosphatase_Tyrosine
4.35976e-49	0.280278	0.068	0.006	6.79208e-45	apical plate	WHL22.19008	SPU_025393	Bloom syndrome protein homolog (LOC575579), mRNA	SPU_025393	DNA replication; DNA repair; DNA recombination; nucleic acid binding; helicase activity; ATP binding; ATP-dependent helicase activity; ATP-dependent 3'-5' DNA helicase activity	RQC domain; Helicase conserved C-terminal domain; DEAD/DEAH box helicase	NucleicAcid_Helicase
2.08662e-48	0.543478	0.156	0.028	3.25074e-44	apical plate	WHL22.215530	Sp-Abcb9C	NA	SPU_026178	transport; transmembrane transport; nucleotide binding; ATP binding; ATPase activity; nucleoside-triphosphatase activity; ATPase activity; coupled to transmembrane movement ofsubstances; integral component of membrane	ABC transporter transmembrane region; ABC transporter	Defensome_ABCTransporter
2.27118e-48	0.654958	0.108	0.014	3.53828e-44	apical plate	WHL22.412294	SPU_012053; Sp-Ck1a2; SPU_025560	casein kinase I isoform alpha (LOC578274), mRNA	SPU_012053; SPU_025241; SPU_025560	transferase activity; transferring phosphorus-containinggroups	NA	NA
2.64666e-48	0.565365	0.153	0.027	4.12323e-44	apical plate	WHL22.485427	Sp-Kcnn1	small conductance calcium-activated potassium channel protein 1 (LOC575136), transcript variant X2, mRNA	SPU_014406	potassium ion transport; calmodulin binding; calcium-activated potassium channel activity; small conductance calcium-activated potassium channelactivity; integral component of membrane	Calmodulin binding domain; Ion channel; Calcium-activated SK potassium channel	CalciumToolkit
3.20847e-48	0.871228	0.55	0.253	4.99848e-44	apical plate	WHL22.171970	Sp-Ino80d	INO80 complex subunit D (LOC582717), transcript variant X1, mRNA	SPU_003614	NA	Potential DNA-binding domain	NA
3.41342e-48	0.857799	0.417	0.155	5.31777e-44	apical plate	WHL22.235105	Sp-Hey4	transcription factor HES-1 (LOC581970), mRNA	SPU_015712	regulation of transcription; DNA-templated; DNA binding; protein dimerization activity	Helix-loop-helix DNA-binding domain; Hairy Orange	TranscriptionFactor_bHLH
1.54085e-47	0.560736	0.063	0.005	2.4005e-43	apical plate	WHL22.600469	Sp-Rdh12_2	retinol dehydrogenase 12 (LOC589120), transcript variant X1, mRNA	SPU_006860	metabolic process; oxidoreductase activity	short chain dehydrogenase; Enoyl-(Acyl carrier protein) reductase; KR domain	Metabolism_SecondaryMetabolites
2.09705e-47	0.678218	0.178	0.036	3.267e-43	apical plate	WHL22.701127	Sp-Megf8-2; Sp-Megf8	multiple epidermal growth factor-like domains protein 8 (LOC586207), mRNA	SPU_026030; SPU_028162	multicellular organismal development; receptor activity; calcium ion binding; protein binding; membrane	Laminin EGF domain; Calcium-binding EGF domain; Plexin repeat	NA
4.93418e-47	0.514812	0.126	0.019	7.68696e-43	apical plate	WHL22.636100	Sp-Pric	prickle-like protein 3 (LOC576048), transcript variant X6, mRNA	SPU_023090	transmembrane transport; zinc ion binding; integral component of membrane	PET Domain; Major Facilitator Superfamily; LIM domain	Metabolism_Carbohydrate
5.82721e-47	0.346177	0.085	0.009	9.07822e-43	apical plate	WHL22.402096	Sp-Nckx	testis potassium dependent sodium/calcium (NCKX), mRNA	SPU_026371	transmembrane transport; integral component of membrane	Sodium/calcium exchanger protein	CalciumToolkit
6.04383e-47	0.465879	0.09	0.011	9.41568e-43	apical plate	WHL22.176382	Sp-Lrr/Igr_6; Sp-Lrig1	leucine-rich repeats and immunoglobulin-like domains protein 3 (LOC580332), transcript variant X1, mRNA	SPU_002757; SPU_028689	protein binding	Leucine rich repeat; Immunoglobulin I-set domain; Leucine Rich repeats (2 copies)	ImmuneSystem_Misc
8.81062e-47	1.01929	0.249	0.066	1.37261e-42	apical plate	WHL22.424341	Sp-Ogt	UDP-N-acetylglucosamine--peptide N-acetylglucosaminyltransferase 110 kDa subunit (LOC579289), transcript variant X1, mRNA	SPU_022646	protein binding	Glycosyl transferase family 41; Tetratricopeptide repeat; TPR repeat	Unclassified
1.6244e-46	0.468814	0.148	0.026	2.53065e-42	apical plate	WHL22.211329	SPU_002860; SPU_012558	plexin domain-containing protein 2 (LOC588913), mRNA	SPU_002860; SPU_012558	multicellular organismal development; receptor activity; membrane	NA	DNA_Replication
2.14601e-46	0.646358	0.143	0.025	3.34327e-42	apical plate	WHL22.106048	Sp-Lef1; Sp-Tcf; SPU_027853	HMG protein Tcf/Lef (Tcf/Lef), mRNA	SPU_003704; SPU_009520; SPU_027853	regulation of transcription; DNA-templated; regulation of transcription from RNA polymerase IIpromoter; Wnt signaling pathway; nucleus	HMG (high mobility group) box; HMG-box domain	TranscriptionFactor_Sox/HMG
2.64651e-46	0.746192	0.352	0.117	4.12299e-42	apical plate	WHL22.96226	SPU_000298; Sp-RasaL2	uncharacterized LOC753988 (LOC753988), transcript variant X2, mRNA	SPU_000298; SPU_000299	NA	NA	NA
3.91198e-46	0.663468	0.158	0.03	6.09448e-42	apical plate	WHL22.700861	Sp-Hypp_537	transcriptional protein SWT1 (LOC100892741), transcript variant X1, mRNA	SPU_008161	protein binding	PIN domain; WW domain	Unclassified
5.17873e-46	0.550773	0.116	0.017	8.06794e-42	apical plate	WHL22.521245	WHL22.521245	uncharacterized LOC756532 (LOC756532), partial mRNA	NA	NA	NA	NA
7.09874e-46	0.381306	0.088	0.01	1.10591e-41	apical plate	WHL22.760344	Sp-CcLta1	uncharacterized LOC100893495 (LOC100893495), mRNA	SPU_011692	ion transport; transmembrane transport; calcium ion transmembrane transport; ion channel activity; voltage-gated calcium channel activity; voltage-gated calcium channel complex; membrane	Ion transport protein; Voltage gated calcium channel IQ domain; Voltage-dependent L-type calcium channel, IQ-associated	CalciumToolkit
7.81752e-46	0.626283	0.244	0.063	1.21789e-41	apical plate	WHL22.719692	Sp-Z145	metal regulatory transcription factor 1 (LOC588463), transcript variant X1, mRNA	SPU_016490	nucleic acid binding; metal ion binding	Zinc finger, C2H2 type; Zinc-finger double domain; C2H2-type zinc finger	Defensome_ReceptorTF
1.06256e-45	0.550867	0.113	0.016	1.65536e-41	apical plate	WHL22.317750	Sp-Cca2dA	voltage-dependent calcium channel subunit alpha-2/delta-3 (LOC100890679), transcript variant X1, mRNA	SPU_012076	catalytic activity	Protein similar to CwfJ C-terminus 1; VWA N-terminal; Neuronal voltage-dependent calcium channel alpha 2acd	CalciumToolkit
3.38869e-45	0.564156	0.176	0.036	5.27923e-41	apical plate	WHL22.370629	Sp-SmocL	SPARC-related modular calcium-binding protein 1 (LOC588667), transcript variant X2, mRNA	SPU_028184	signal transduction; calcium ion binding; protein binding; proteinaceous extracellular matrix	Thyroglobulin type-1 repeat; Secreted protein acidic and rich in cysteine Ca binding region; EF-hand domain pair	Adhesion_Proteoglycan
7.02682e-45	0.432098	0.08	0.009	1.09471e-40	apical plate	WHL22.6050	Sp-Cf5/8L1	uncharacterized LOC584294 (LOC584294), mRNA	SPU_021228	cell adhesion; homophilic cell adhesion; calcium ion binding; membrane	F5/8 type C domain	ImmuneSystem_Coagulation
7.63224e-45	0.322752	0.068	0.006	1.18903e-40	apical plate	WHL22.467667	Sp-Osbp; Sp-Osbp_1; Sp-Osbp_2; Sp-Osbp2_1	oxysterol-binding protein 1 (LOC585956), transcript variant X3, mRNA	SPU_004673; SPU_008130; SPU_008612; SPU_020174	NA	Oxysterol-binding protein	NA
9.37767e-45	0.326794	0.063	0.005	1.46095e-40	apical plate	WHL22.54782	Sp-Z398	titin (LOC100888195), mRNA	SPU_015071	nucleic acid binding; metal ion binding	Zinc-finger double domain; Zinc finger, C2H2 type; C2H2-type zinc finger	ZincFinger
1.2884e-44	0.620615	0.198	0.046	2.0072e-40	apical plate	WHL22.141450	SPU_009749	protein-methionine sulfoxide oxidase mical2 (LOC100890355), mRNA	SPU_009749	NA	NA	NA
1.94108e-44	0.676788	0.113	0.017	3.02401e-40	apical plate	WHL22.708124	SPU_010341	uncharacterized LOC763730 (LOC763730), mRNA	SPU_010341	signal transduction; protein binding	NA	NA
2.56687e-44	0.629842	0.131	0.022	3.99893e-40	apical plate	WHL22.461126	Sp-Chn2	beta-chimaerin (LOC574628), transcript variant X2, mRNA	SPU_000202	signal transduction; intracellular signal transduction; protein binding; intracellular	RhoGAP domain; SH2 domain; Phorbol esters/diacylglycerol binding domain (C1 domain)	GTPase_RhoRegulator_RhoGAP
3.09428e-44	0.722722	0.229	0.058	4.82057e-40	apical plate	WHL22.535609	Sp-PaxC	paired box protein Pax-9 (LOC583610), mRNA	SPU_000276	regulation of transcription; DNA-templated; DNA binding	'Paired box' domain	TranscriptionFactor_Homeo
6.2462e-44	0.649418	0.146	0.027	9.73096e-40	apical plate	WHL22.357794	Sp-Hypp_3049	uncharacterized LOC100892388 (LOC100892388), transcript variant X2, mRNA	SPU_017246	chromatin modification; protein binding; zinc ion binding; nucleus	PHD-finger	NA
6.46086e-44	0.582755	0.163	0.033	1.00654e-39	apical plate	WHL22.136019	Sp-Bahd1	uncharacterized LOC100892440 (LOC100892440), mRNA	SPU_018536	chromatin binding	BAH domain	Unclassified
1.25696e-43	0.555913	0.116	0.018	1.95822e-39	apical plate	WHL22.763086	Sp-Ephrin	ephrin-B2 (LOC763882), mRNA	SPU_023757	membrane	Ephrin	Signaling_RTK_Ligand
1.70399e-43	0.485105	0.116	0.018	2.65465e-39	apical plate	WHL22.127355	SPU_020502	tetratricopeptide repeat protein 28 (LOC581953), mRNA	SPU_020502	protein binding	Tetratricopeptide repeat; Tetratricopeptide repeat; TPR repeat	Unclassified
4.54435e-43	0.484641	0.163	0.033	7.07964e-39	apical plate	WHL22.719694	Sp-Usp34-2	ubiquitin carboxyl-terminal hydrolase 34 (LOC100890137), mRNA	SPU_003692	NA	NA	NA
5.92124e-43	0.918826	0.324	0.107	9.2247e-39	apical plate	WHL22.621366	SPU_012739	F-BAR domain only protein 2 (LOC100893850), transcript variant X5, mRNA	SPU_012739	electron carrier activity; protein domain specific binding; heme binding	Fes/CIP4, and EFC/F-BAR homology domain	Unclassified
2.04988e-42	0.792898	0.261	0.074	3.19351e-38	apical plate	WHL22.234581	Sp-Rvt/Exn/End/Pplp_1	uncharacterized LOC585101 (LOC585101), mRNA	SPU_016918	RNA-dependent DNA replication; RNA binding; RNA-directed DNA polymerase activity; protein binding	Reverse transcriptase (RNA-dependent DNA polymerase); Ankyrin repeats (many copies); Ankyrin repeats (3 copies)	NA
2.35127e-42	0.904548	0.312	0.1	3.66305e-38	apical plate	WHL22.362941	Sp-Crop	luc7-like protein 3 (LOC590254), mRNA	SPU_004635	mRNA splice site selection; mRNA binding; U1 snRNP	LUC7 N_terminus	Unclassified
1.54875e-41	0.747189	0.118	0.019	2.41279e-37	apical plate	WHL22.751080	Sp-Mt_2; SPU_022022	uncharacterized LOC586122 (LOC586122), mRNA	SPU_008773; SPU_022022	NA	Methyltransferase domain; Methyltransferase domain; Methyltransferase domain	Transferase
1.78612e-41	0.759858	0.472	0.2	2.7826e-37	apical plate	WHL22.364960	WHL22.364960	uncharacterized LOC574812 (LOC574812), mRNA	NA	NA	NA	NA
1.80844e-41	0.772063	0.693	0.442	2.81736e-37	apical plate	WHL22.381478	Sp-Chd3	chromodomain-helicase-DNA-binding protein Mi-2 homolog (LOC753159), mRNA	SPU_023296	regulation of transcription; DNA-templated; nucleic acid binding; DNA binding; helicase activity; protein binding; ATP binding; zinc ion binding; hydrolase activity; acting on acid anhydrides; inphosphorus-containing anhydrides; nucleus	CHDCT2 (NUC038) domain; SNF2 family N-terminal domain; Domain of Unknown Function (DUF1086)	NucleicAcid_Helicase
3.00155e-41	0.332724	0.073	0.008	4.67611e-37	apical plate	WHL22.689469	Sp-Unc44_120	NA	SPU_016928	protein binding; hydrolase activity	Ankyrin repeats (3 copies); Ankyrin repeats (many copies); Ankyrin repeats (many copies)	Unclassified
8.80368e-41	0.697759	0.226	0.06	1.37153e-36	apical plate	WHL22.54575	WHL22.54575	uncharacterized LOC762820 (LOC762820), transcript variant X1, mRNA	NA	NA	NA	NA
9.16937e-41	0.451198	0.131	0.023	1.4285e-36	apical plate	WHL22.491771	Sp-122C_1; Sp-122C	anoctamin-4 (LOC587178), transcript variant X2, mRNA	SPU_002164; SPU_002165	NA	Calcium-activated chloride channel	NA
1.66139e-40	0.690603	0.224	0.059	2.58828e-36	apical plate	WHL22.588065	Sp-Hypp_1572; Sp-Chst15L	carbohydrate sulfotransferase 15-like (LOC105446947), mRNA	SPU_005242; SPU_017290	NA	NA	NA
4.76442e-40	0.330204	0.048	0.003	7.42249e-36	apical plate	WHL22.667534	Sp-MyXII_1; Sp-MyXII	unconventional myosin-X (LOC100892611), mRNA	SPU_013384; SPU_026002	motor activity; protein binding; ATP binding; myosin complex	Myosin head (motor domain)	Cytoskeleton_Myosin
5.18919e-40	0.514258	0.143	0.028	8.08424e-36	apical plate	WHL22.615301	Sp-NaC; Sp-Scn5a	sodium channel protein type 4 subunit alpha B (LOC588616), mRNA	SPU_025996; SPU_025997	NA	NA	Fertilization
5.22134e-40	0.671191	0.244	0.069	8.13432e-36	apical plate	WHL22.460019	Sp-Drd1	D(1) dopamine receptor-like (LOC581753), mRNA	SPU_011320	G-protein coupled receptor signaling pathway; G-protein coupled receptor activity; dopamine neurotransmitter receptor activity; integral component of plasma membrane; integral component of membrane	7 transmembrane receptor (rhodopsin family); Serpentine type 7TM GPCR chemoreceptor Srsx; Serpentine type 7TM GPCR chemoreceptor Srx	Nervous_NeurotransmitterRelated
7.83736e-40	0.935877	0.349	0.133	1.22098e-35	apical plate	WHL22.608496	Sp-Wnk	serine/threonine-protein kinase WNK3 (LOC578600), mRNA	SPU_022200	protein phosphorylation; protein kinase activity; protein serine/threonine kinase activity; ATP binding; transferase activity; transferring phosphorus-containing groups	Protein kinase domain; Protein tyrosine kinase; Oxidative-stress-responsive kinase 1 C-terminal domain	Kinase_Other
1.3157e-39	0.682682	0.186	0.044	2.04973e-35	apical plate	WHL22.192028	Sp-Bamacan	structural maintenance of chromosomes protein 3 (LOC594026), transcript variant X1, mRNA	SPU_019803	chromosome organization; protein binding; ATP binding; chromosome	RecF/RecN/SMC N terminal domain; SMC proteins Flexible Hinge Domain; AAA domain, putative AbiEii toxin, Type IV TA system	Adhesion_Proteoglycan
1.63974e-39	0.770504	0.279	0.088	2.55454e-35	apical plate	WHL22.486090	Sp-Fam116a	protein DENND6A (LOC577819), transcript variant X1, mRNA	SPU_015085	NA	Stabilization of polarity axis; DENN (AEX-3) domain; Transport protein Avl9	Homolog-of-gene-with-unknown-function
3.7685e-39	0.836788	0.397	0.158	5.87095e-35	apical plate	WHL22.479724	Sp-Cobll	titin (LOC589781), transcript variant X4, mRNA	SPU_007437	NA	Cordon-bleu ubiquitin-like domain	Transferase
5.0789e-39	0.3975	0.103	0.016	7.91242e-35	apical plate	WHL22.19569	WHL22.19569	NA	NA	NA	NA	NA
7.80031e-39	0.792938	0.392	0.152	1.21521e-34	apical plate	WHL22.171890	SPU_002500; Sp-Cxxc1	CXXC-type zinc finger protein 1 (LOC590665), mRNA	SPU_002500; SPU_016903	DNA binding; zinc ion binding	CXXC zinc finger domain	NA
7.9137e-39	0.350782	0.083	0.011	1.23287e-34	apical plate	WHL22.468282	WHL22.468282	uncharacterized LOC100889395 (LOC100889395), mRNA	NA	NA	NA	NA
3.07016e-38	0.427898	0.131	0.024	4.78301e-34	apical plate	WHL22.270947	WHL22.270947	rho guanine nucleotide exchange factor 3 (LOC584816), transcript variant X1, mRNA	NA	NA	NA	NA
3.59531e-38	0.517831	0.161	0.035	5.60113e-34	apical plate	WHL22.428137	Sp-B3galt1	UDP-GlcNAc:betaGal beta-1,3-N-acetylglucosaminyltransferase 7-like (LOC575270), mRNA	SPU_000771	protein glycosylation; galactosyltransferase activity; membrane	Galactosyltransferase	Metabolism_Carbohydrate
5.65046e-38	0.30294	0.07	0.008	8.80285e-34	apical plate	WHL22.559713	SPU_022115	collagen alpha-1(I) chain (LOC580931), mRNA	SPU_022115	NA	NA	NA
8.64122e-38	0.546351	0.116	0.02	1.34622e-33	apical plate	WHL22.530651	WHL22.530651	uncharacterized LOC100890957 (LOC100890957), mRNA	NA	NA	NA	NA
1.98889e-37	0.491497	0.131	0.025	3.09849e-33	apical plate	WHL22.450198	SPU_002205; SPU_002206	CLIP-associating protein 1 (LOC592166), mRNA	SPU_002205; SPU_002206	NA	NA	NA
3.32403e-37	0.654732	0.211	0.058	5.17851e-33	apical plate	WHL22.255792	SPU_005735; Sp-Dis3l2_1	DIS3-like exonuclease 2 (LOC576737), mRNA	SPU_005735; SPU_008010	NA	Dis3-like cold-shock domain 2 (CSD2)	NA
4.81548e-37	0.574355	0.068	0.008	7.50204e-33	apical plate	WHL22.691632	Sp-Megf10L	uncharacterized LOC582027 (LOC582027), transcript variant X2, mRNA	SPU_008918	protein binding	EGF-like domain; Laminin EGF domain	Unclassified
4.921e-37	0.577245	0.244	0.071	7.66643e-33	apical plate	WHL22.41221	Sp-Vps13a; Sp-Vps13c	vacuolar protein sorting-associated protein 13C (LOC575234), mRNA	SPU_001235; SPU_019032	NA	Repeating coiled region of VPS13; Vacuolar sorting-associated protein 13, N-terminal; N-terminal region of Chorein or VPS13	Homolog-of-gene-with-unknown-function
5.05832e-37	0.320099	0.09	0.013	7.88036e-33	apical plate	WHL22.578686	Sp-Slc30a3_1	zinc transporter 2 (LOC582642), transcript variant X2, mRNA	SPU_000174	cation transport; transmembrane transport; cation transmembrane transporter activity; integral component of membrane	Cation efflux family	Metabolism_InorganicIon
5.37919e-37	0.646317	0.688	0.417	8.38024e-33	apical plate	WHL22.235339	Sp-Hes	transcription factor HES-4 (LOC592057), mRNA	SPU_021608	regulation of transcription; DNA-templated; DNA binding; protein dimerization activity	Helix-loop-helix DNA-binding domain; Hairy Orange	Nervous_TF
5.69337e-37	0.574503	0.148	0.031	8.8697e-33	apical plate	WHL22.48544	Sp-Slc17a5_2	sialin (LOC590947), transcript variant X1, mRNA	SPU_005534	transmembrane transport; integral component of membrane	Major Facilitator Superfamily; Sugar (and other) transporter	Metabolism_Carbohydrate
7.82479e-37	0.700682	0.364	0.137	1.21902e-32	apical plate	WHL22.652302	Sp-Qki	protein quaking-A (LOC581568), transcript variant X1, mRNA	SPU_009086	RNA binding	Homodimerisation region of STAR domain protein; KH domain	NA
9.04605e-37	0.353523	0.065	0.007	1.40928e-32	apical plate	WHL22.606450	WHL22.606450	syntaxin-8 (LOC100889953), mRNA	NA	NA	NA	NA
1.01524e-36	0.308514	0.08	0.011	1.58164e-32	apical plate	WHL22.452247	Sp-Hypp_1954	uncharacterized LOC594282 (LOC594282), transcript variant X2, ncRNA	SPU_010999	NA	NA	NA
1.03412e-36	0.65828	0.141	0.029	1.61106e-32	apical plate	WHL22.600986	Sp-Hypp_180; Sp-Hypp_1036	uncharacterized LOC586719 (LOC586719), mRNA	SPU_022017; SPU_022018	NA	NA	NA
4.45609e-36	0.716975	0.241	0.073	6.94214e-32	apical plate	WHL22.366705	Sp-Efcab6	EF-hand calcium-binding domain-containing protein 6 (LOC753719), partial mRNA	SPU_015272	calcium ion binding	EF-hand domain; EF-hand domain; EF-hand domain pair	CalciumToolkit_CalciumBinding
6.70812e-36	0.514238	0.123	0.023	1.04506e-31	apical plate	WHL22.403334	Sp-Dcc/NeogL; SPU_025976	neogenin (LOC100891979), transcript variant X3, mRNA	SPU_025975; SPU_025976	acid phosphatase activity; protein binding	Fibronectin type III domain; Immunoglobulin I-set domain; Immunoglobulin domain	Adhesion_IgFN3Receptor
1.04542e-35	0.398259	0.08	0.011	1.62866e-31	apical plate	WHL22.477325	Sp-Hypp_1689	trithorax group protein osa (LOC588874), transcript variant X1, mRNA	SPU_006957	protein binding	Ankyrin repeats (3 copies); Ankyrin repeats (many copies); Ankyrin repeats (many copies)	Unclassified
1.1636e-35	0.315052	0.053	0.005	1.81277e-31	apical plate	WHL22.395970	Sp-Dpp10_1	inactive dipeptidyl peptidase 10 (LOC581560), partial mRNA	SPU_025407	proteolysis; membrane	Dipeptidyl peptidase IV (DPP IV) N-terminal region	Metabolism_ProteinDegradation
1.59814e-35	0.717404	0.349	0.135	2.48974e-31	apical plate	WHL22.754033	Sp-Chd1; SPU_004736	chromodomain-helicase-DNA-binding protein 1 (LOC575959), transcript variant X6, mRNA	SPU_004735; SPU_004736	nucleic acid binding; DNA binding; helicase activity; ATP binding; ATP-dependent helicase activity	SNF2 family N-terminal domain; CDH1/2 SANT-Helical linker 1; Chromo (CHRromatin Organisation MOdifier) domain	NucleicAcid_Helicase
2.21545e-35	0.718631	0.422	0.179	3.45145e-31	apical plate	WHL22.532435	Sp-Otx	orthodenticle-related protein (otx), transcript variant alpha, mRNA	SPU_010424	regulation of transcription; DNA-templated; DNA binding; sequence-specific DNA binding transcription factoractivity; sequence-specific DNA binding; nucleus	Homeodomain	Nervous_TF
3.35708e-35	0.701133	0.256	0.08	5.23e-31	apical plate	WHL22.248839	Sp-Hypp_1999; Sp-Nphp1	nephrocystin-1 (LOC576932), mRNA	SPU_011728; SPU_011729	protein binding	SH3 domain; Variant SH3 domain; Variant SH3 domain	Unclassified
3.70552e-35	0.586669	0.131	0.026	5.77282e-31	apical plate	WHL22.523959	Sp-Hbn	retinal homeobox protein Rx1 (LOC575572), mRNA	SPU_023177	regulation of transcription; DNA-templated; DNA binding; sequence-specific DNA binding transcription factoractivity; sequence-specific DNA binding; nucleus	Homeodomain	Nervous_TF
1.82477e-34	0.491456	0.123	0.024	2.8428e-30	apical plate	WHL22.438892	Sp-Plekhg1	pleckstrin homology domain-containing family G member 3-like (LOC105443572), mRNA	SPU_014884	regulation of Rho protein signal transduction; Rho guanyl-nucleotide exchange factor activity	RhoGEF domain; PH domain	GTPase_RhoRegulator_RhoGEFDH
1.87654e-34	0.749842	0.188	0.05	2.92346e-30	apical plate	WHL22.117840	Sp-Whsc1; Sp-Trx	histone-lysine N-methyltransferase NSD2 (LOC580047), transcript variant X2, mRNA	SPU_004382; SPU_027218	protein binding; zinc ion binding	PWWP domain; PHD-finger; HMG (high mobility group) box	Histone_Methyltransferase
2.20569e-34	0.27275	0.083	0.012	3.43624e-30	apical plate	WHL22.101123	Sp-Sgarp1	muscle M-line assembly protein unc-89 (LOC100890016), mRNA	SPU_010811	NA	NA	NA
2.43299e-34	0.375725	0.075	0.01	3.79036e-30	apical plate	WHL22.54587	Sp-Hypp_9787	uncharacterized LOC100887903 (LOC100887903), mRNA	SPU_027959	NA	NA	NA
3.43817e-34	0.257009	0.04	0.003	5.35632e-30	apical plate	WHL22.472728	SPU_016269	glutathione S-transferase theta-1 (LOC588398), mRNA	SPU_016269	protein binding	Glutathione S-transferase, N-terminal domain; Glutathione S-transferase, N-terminal domain	Transferase
3.46311e-34	0.274903	0.058	0.006	5.39518e-30	apical plate	WHL22.507651	SPU_022034	dual specificity tyrosine-phosphorylation-regulated kinase 4 (LOC579475), transcript variant X1, mRNA	SPU_022034	NA	NA	NA
4.07723e-34	0.486753	0.07	0.009	6.35191e-30	apical plate	WHL22.287207	WHL22.287207	uncharacterized LOC105441401 (LOC105441401), ncRNA	NA	NA	NA	NA
4.30877e-34	0.658744	0.151	0.034	6.71263e-30	apical plate	WHL22.667002	Sp-Z61; Sp-Z83	zinc finger protein 345-like (LOC105436407), mRNA	SPU_022892; SPU_022893	nucleic acid binding; metal ion binding	Zinc-finger double domain; Zinc finger, C2H2 type; C2H2-type zinc finger	ZincFinger
1.04332e-33	0.745137	0.193	0.053	1.62539e-29	apical plate	WHL22.450938	Sp-Ttc3L; Sp-Ttc3	uncharacterized LOC592552 (LOC592552), mRNA	SPU_024521; SPU_024524	protein binding	NA	NA
1.09696e-33	0.818953	0.47	0.223	1.70896e-29	apical plate	WHL22.522166	Sp-Pdhb	mucin-17 (LOC580083), transcript variant X5, mRNA	SPU_028354	acetyl-CoA biosynthetic process from pyruvate; metabolic process; catalytic activity; pyruvate dehydrogenase (acetyl-transferring) activity; protein binding; zinc ion binding	Transketolase, pyrimidine binding domain; Transketolase, C-terminal domain; SET domain	Metabolism_Energy
2.05666e-33	0.531658	0.163	0.04	3.20407e-29	apical plate	WHL22.610032	SPU_005240	calponin homology domain-containing protein DDB_G0272472 (LOC100888090), mRNA	SPU_005240	NA	NA	NA
3.06283e-33	0.445099	0.106	0.019	4.77158e-29	apical plate	WHL22.234491	WHL22.234491	uncharacterized LOC755020 (LOC755020), mRNA	NA	NA	NA	NA
3.48986e-33	0.322376	0.078	0.011	5.43685e-29	apical plate	WHL22.751223	Sp-Fak	focal adhesion kinase 1-like (LOC105436929), mRNA	SPU_019686	protein phosphorylation; signal complex assembly; protein kinase activity; protein tyrosine kinase activity; signal transducer activity; ATP binding; transferase activity; transferring phosphorus-containing groups; cytoskeleton; focal adhesion	Protein tyrosine kinase; Focal adhesion targeting region; Protein kinase domain	Fertilization
4.31424e-33	0.419777	0.121	0.024	6.72116e-29	apical plate	WHL22.123215	SPU_020271	low-density lipoprotein receptor-related protein 4 (LOC100893842), mRNA	SPU_020271	NA	Low-density lipoprotein receptor repeat class B	NA
4.49836e-33	0.534434	0.156	0.037	7.008e-29	apical plate	WHL22.715182	SPU_003517; Sp-Hypp_1817; Sp-Qrich2L	glutamine-rich protein 2 (LOC755388), transcript variant X4, mRNA	SPU_003517; SPU_008961; SPU_012788	NA	NA	NA
5.14751e-33	0.698971	0.226	0.069	8.0193e-29	apical plate	WHL22.179516	SPU_002653; Sp-MyXVIII; Sp-Myo18a_3	unconventional myosin-XVIIIa (LOC762889), mRNA	SPU_002653; SPU_003881; SPU_027305	motor activity; ATP binding; myosin complex	Myosin head (motor domain)	Cytoskeleton_Cytokinesis
6.34678e-33	0.660031	0.204	0.059	9.88765e-29	apical plate	WHL22.547520	Sp-Cg15216pa	uncharacterized LOC578501 (LOC578501), mRNA	SPU_009389	NA	NA	NA
1.08037e-32	0.573702	0.158	0.038	1.68311e-28	apical plate	WHL22.457020	Sp-Tbx2-3	T-box 2/3 protein (Tbx2/3), transcript variant X1, mRNA	SPU_023386	regulation of transcription; DNA-templated; sequence-specific DNA binding transcription factor activity; nucleus	T-box	TranscriptionFactor_Tbox
1.61301e-32	0.686619	0.204	0.058	2.51291e-28	apical plate	WHL22.361667	WHL22.361667	uncharacterized LOC763713 (LOC763713), transcript variant X3, mRNA	NA	NA	NA	NA
1.62183e-32	0.337785	0.065	0.008	2.52665e-28	apical plate	WHL22.737155	SPU_010507	PHD finger protein 13 (LOC580384), mRNA	SPU_010507	protein binding; zinc ion binding	PHD-finger; PHD-finger	NA
3.03456e-32	0.567076	0.239	0.075	4.72754e-28	apical plate	WHL22.477016	Sp-Ttl13; SPU_018448	tubulin polyglutamylase ttll6 (LOC584220), transcript variant X3, mRNA	SPU_018447; SPU_018448	cellular protein modification process	Tubulin-tyrosine ligase family; YheC/D like ATP-grasp; Sugar-transfer associated ATP-grasp	Ligase
4.17213e-32	0.372597	0.08	0.012	6.49976e-28	apical plate	WHL22.754250	Sp-Slc8a1	sodium/calcium exchanger 2 (LOC577006), mRNA	SPU_006810	calcium ion transport; cell communication; transmembrane transport; calcium:sodium antiporter activity; membrane; integral component of membrane	Sodium/calcium exchanger protein; Calx-beta domain	CalciumToolkit
5.20396e-32	0.480812	0.106	0.019	8.10724e-28	apical plate	WHL22.455878	Sp-Reps1L; Sp-Reps1L_1; Sp-Reps1L_2	ralBP1-associated Eps domain-containing protein 1 (LOC592824), transcript variant X3, mRNA	SPU_001046; SPU_019955; SPU_027211	NA	NA	NA
6.83416e-32	0.462328	0.108	0.02	1.06469e-27	apical plate	WHL22.337216	Sp-Eif2ak	eukaryotic translation initiation factor 2-alpha kinase 4 (LOC588023), mRNA	SPU_004272	protein phosphorylation; protein kinase activity; protein serine/threonine kinase activity; protein binding; ATP binding; transferase activity; transferring phosphorus-containing groups	Protein kinase domain; Protein tyrosine kinase; Histidyl-tRNA synthetase	TranslationFactor
1.04988e-31	0.586234	0.188	0.052	1.63561e-27	apical plate	WHL22.524985	SPU_025710; SPU_025711	protein rolling stone (LOC752655), mRNA	SPU_025710; SPU_025711	NA	NA	NA
1.21511e-31	0.61531	0.314	0.118	1.89303e-27	apical plate	WHL22.323968	Sp-Fn3f_67; Sp-Fgfr	fibroblast growth factor receptor (FGFR), transcript variant X3, mRNA	SPU_020676; SPU_020677	protein binding	Fibronectin type III domain	Adhesion_Atypical
1.78447e-31	0.434083	0.085	0.013	2.78002e-27	apical plate	WHL22.664188	Sp-Syt7	synaptotagmin-7 (LOC594711), transcript variant X5, mRNA	SPU_020199	transport; transporter activity; protein binding; synaptic vesicle; membrane	C2 domain	CalciumToolkit
1.84879e-31	0.347758	0.101	0.018	2.88022e-27	apical plate	WHL22.331826	SPU_000686	heparan sulfate glucosamine 3-O-sulfotransferase 5-like (LOC753343), mRNA	SPU_000686	NA	NA	NA
3.28731e-31	0.613552	0.219	0.067	5.12129e-27	apical plate	WHL22.316666	WHL22.316666	protein sprouty homolog 3-like (LOC752296), transcript variant X2, mRNA	NA	NA	NA	NA
3.44414e-31	0.534413	0.123	0.026	5.36563e-27	apical plate	WHL22.641275	Sp-Gcnt2_1	sodium-dependent multivitamin transporter (LOC578787), transcript variant X2, mRNA	SPU_007407	acetylglucosaminyltransferase activity; membrane	Core-2/I-Branching enzyme	Metabolism_Carbohydrate
7.53999e-31	0.597386	0.136	0.031	1.17465e-26	apical plate	WHL22.748665	Sp-Slc18a2	synaptic vesicular amine transporter (LOC580049), mRNA	SPU_006301	transmembrane transport; integral component of membrane	Major Facilitator Superfamily; Sugar (and other) transporter	Transporter_Monoamine
8.21925e-31	0.38057	0.116	0.023	1.28048e-26	apical plate	WHL22.389057	SPU_002305; SPU_018256	glutaredoxin domain-containing cysteine-rich protein 1 (LOC580238), mRNA	SPU_002305; SPU_018256	cell redox homeostasis; electron carrier activity; protein disulfide oxidoreductase activity	Glutaredoxin	Oxidoreductase
1.04034e-30	0.319358	0.063	0.008	1.62075e-26	apical plate	WHL22.667269	Sp-Rab40; SPU_027125	ras-related protein Rab-40B (LOC580472), mRNA	SPU_011467; SPU_027125	GTP catabolic process; signal transduction; small GTPase mediated signal transduction; protein transport; intracellular signal transduction; GTP binding; membrane	Ras family; Ras of Complex, Roc, domain of DAPkinase; SOCS box	GTPase_Ras_Rab
1.35588e-30	0.671773	0.231	0.075	2.11232e-26	apical plate	WHL22.470507	Sp-Ahi1	jouberin (LOC100892609), mRNA	SPU_017308	NA	NA	NA
1.78394e-30	0.419366	0.123	0.026	2.7792e-26	apical plate	WHL22.517541	Sp-Hypp_742	general transcription factor 3C polypeptide 1 (LOC588089), partial mRNA	SPU_014200	NA	B-block binding subunit of TFIIIC	NA
1.99249e-30	0.494202	0.128	0.028	3.1041e-26	apical plate	WHL22.364513	SPU_017049; SPU_019036; Sp-Luc7l2L	putative RNA-binding protein Luc7-like 2 (LOC590757), mRNA	SPU_017049; SPU_019036; SPU_023529	mRNA splice site selection; mRNA binding; U1 snRNP	LUC7 N_terminus	Unclassified
2.11091e-30	0.497395	0.083	0.013	3.28859e-26	apical plate	WHL22.421749	WHL22.421749	uncharacterized LOC100891716 (LOC100891716), transcript variant X2, mRNA	NA	NA	NA	NA
4.61278e-30	0.505164	0.146	0.035	7.18624e-26	apical plate	WHL22.502202	Sp-Mtss1L; Sp-Mtss1L_2	MTSS1-like protein (LOC576126), mRNA	SPU_002941; SPU_009721	signal transduction; filopodium assembly; cytoskeletal adaptor activity; SH3 domain binding	IRSp53/MIM homology domain	Unclassified
4.64836e-30	0.736771	0.377	0.167	7.24168e-26	apical plate	WHL22.581242	Sp-Nek1	serine/threonine-protein kinase Nek1 (LOC577477), transcript variant X2, mRNA	SPU_019021	protein phosphorylation; protein kinase activity; protein serine/threonine kinase activity; ATP binding; transferase activity; transferring phosphorus-containing groups	Protein kinase domain; Protein tyrosine kinase; Kinase-like	CellCycle
4.68029e-30	0.350417	0.085	0.014	7.29142e-26	apical plate	WHL22.61681	Sp-Lhh2bc	histone H2B-like (LOC589998), mRNA	SPU_000972	nucleosome assembly; DNA binding; protein heterodimerization activity; nucleosome; nucleus	Core histone H2A/H2B/H3/H4; Histone-like transcription factor (CBF/NF-Y) and archaeal histone	Histone_Late
6.55984e-30	0.81871	0.236	0.079	1.02196e-25	apical plate	WHL22.352356	Sp-Nav2; SPU_021536; Sp-Hypp_1076	neuron navigator 2 (LOC587482), mRNA	SPU_008664; SPU_021536; SPU_023210	nucleotide binding; ATP binding; nucleoside-triphosphatase activity	AAA domain; ATPase family associated with various cellular activities (AAA); AAA domain	NA
7.31786e-30	0.582215	0.209	0.063	1.14005e-25	apical plate	WHL22.323545	Sp-FgfrL; Sp-Fgfrl1; SPU_028282	fibroblast growth factor receptor-like 1 (FGFRL1), transcript variant X3, mRNA	SPU_020680; SPU_020681; SPU_028282	protein binding	Immunoglobulin I-set domain; Immunoglobulin domain; Immunoglobulin domain	Signaling_RTK_Receptor
8.32526e-30	0.28092	0.078	0.012	1.29699e-25	apical plate	WHL22.376027	Sp-Hypp_1318	uncharacterized LOC575705 (LOC575705), transcript variant X2, mRNA	SPU_001246	NA	NA	NA
9.73748e-30	0.307481	0.073	0.011	1.517e-25	apical plate	WHL22.546061	SPU_018007; Sp-Rictor_1	rapamycin-insensitive companion of mTOR (LOC591989), mRNA	SPU_018007; SPU_019171	TOR signaling; TORC2 complex	Rapamycin-insensitive companion of mTOR, N-term	NA
9.90948e-30	0.339981	0.997	0.924	1.5438e-25	apical plate	WHL22.255462	Sp-Ars_1	arylsulfatase (ARS), mRNA	SPU_023353	metabolic process; catalytic activity; sulfuric ester hydrolase activity	Sulfatase; C-terminal region of aryl-sulfatase; Type I phosphodiesterase / nucleotide pyrophosphatase	Hydrolase
1.007e-29	0.424536	0.143	0.034	1.5688e-25	apical plate	WHL22.592734	SPU_006112; Sp-Ddef1	arf-GAP with SH3 domain, ANK repeat and PH domain-containing protein 2 (LOC577726), transcript variant X8, mRNA	SPU_006112; SPU_008897	NA	BAR domain of APPL family	NA
1.09636e-29	0.300999	0.048	0.005	1.70802e-25	apical plate	WHL22.3534	SPU_012451	uncharacterized LOC100888085 (LOC100888085), mRNA	SPU_012451	neurotransmitter transport; neurotransmitter:sodium symporter activity; integral component of membrane	Sodium:neurotransmitter symporter family	NA
1.64872e-29	0.544945	0.143	0.035	2.56854e-25	apical plate	WHL22.389215	SPU_013277	NA	SPU_013277	NA	NA	NA
3.29799e-29	0.35091	0.068	0.009	5.13794e-25	apical plate	WHL22.131638	SPU_003798	retinoblastoma-like protein 1 (LOC594490), mRNA	SPU_003798	regulation of transcription from RNA polymerase II promoter; regulation of cell cycle	Domain of unknown function (DUF3452)	NA
5.12426e-29	0.301978	0.06	0.008	7.98308e-25	apical plate	WHL22.177151	Sp-Hypp_1128	uncharacterized LOC100891205 (LOC100891205), transcript variant X1, mRNA	SPU_024852	scavenger receptor activity; membrane	Scavenger receptor cysteine-rich domain; WSC domain; Sushi repeat (SCR repeat)	NA
5.49607e-29	0.53243	0.224	0.072	8.56232e-25	apical plate	WHL22.89142	Sp-St6galnac4	uncharacterized LOC586641 (LOC586641), transcript variant X1, mRNA	SPU_005523	protein glycosylation; sialyltransferase activity	Glycosyltransferase family 29 (sialyltransferase)	Metabolism_Carbohydrate
7.63513e-29	0.574023	0.327	0.131	1.18948e-24	apical plate	WHL22.145405	Sp-Dnl1	DNA ligase 1 (LOC752989), mRNA	SPU_016791	DNA replication; DNA repair; DNA recombination; DNA ligation involved in DNA repair; DNA binding; DNA ligase activity; DNA ligase (ATP) activity; ATP binding	DNA ligase N terminus; ATP dependent DNA ligase domain; ATP dependent DNA ligase C terminal region	Ligase
1.29243e-28	0.583229	0.178	0.051	2.01348e-24	apical plate	WHL22.585089	Sp-Hypp_93	uncharacterized LOC757118 (LOC757118), transcript variant X1, mRNA	SPU_013603	protein dimerization activity	Domain of unknown function (DUF4801)	NucleicAcid_Binding
1.32307e-28	0.542299	0.196	0.059	2.06121e-24	apical plate	WHL22.184705	Sp-Hypp_3063	kinesin-related protein 4 (LOC577585), mRNA	SPU_013083	DNA binding; binding; protein binding	Armadillo/beta-catenin-like repeat; Chromo (CHRromatin Organisation MOdifier) domain	NA
2.05832e-28	0.278808	0.06	0.008	3.20666e-24	apical plate	WHL22.747146	Sp-Kcnj12_1	NA	SPU_024884	potassium ion transport; inward rectifier potassium channel activity; integral component of membrane	Inward rectifier potassium channel C-terminal domain; Inward rectifier potassium channel transmembrane domain	Metabolism_InorganicIon
2.74083e-28	0.258227	0.045	0.005	4.26994e-24	apical plate	WHL22.298945	WHL22.298945	uncharacterized LOC100892192 (LOC100892192), mRNA	NA	NA	NA	NA
2.77364e-28	0.487812	0.121	0.027	4.32106e-24	apical plate	WHL22.737251	Sp-Fbxl20	uncharacterized LOC100889573 (LOC100889573), mRNA	SPU_024652	protein binding	F-box-like; F-box domain; Leucine Rich repeat	CellCycle_Cyclin
3.19832e-28	0.616903	0.153	0.04	4.98266e-24	apical plate	WHL22.145766	Sp-NippbL	nipped-B-like protein (LOC589254), mRNA	SPU_025723	binding	Sister chromatid cohesion C-terminus; HEAT repeat associated with sister chromatid cohesion	NA
3.82241e-28	0.521163	0.658	0.397	5.95493e-24	apical plate	WHL22.288460	Sp-CplcaIIIb	actin, cytoskeletal 3B (LOC100890099), mRNA	SPU_009433	NA	Actin	Cytoskeleton_Actin
4.24737e-28	0.319715	0.07	0.01	6.61698e-24	apical plate	WHL22.564635	Sp-Pkx1	cAMP-dependent protein kinase catalytic subunit PRKX (LOC583938), transcript variant X1, mRNA	SPU_020398	protein phosphorylation; protein kinase activity; protein serine/threonine kinase activity; ATP binding; transferase activity; transferring phosphorus-containing groups	Protein kinase domain; Protein tyrosine kinase; Kinase-like	Kinase_AGC
4.42265e-28	0.324669	0.065	0.009	6.89004e-24	apical plate	WHL22.358987	SPU_000907	NA	SPU_000907	NA	NA	NA
5.1437e-28	0.651064	0.156	0.042	8.01337e-24	apical plate	WHL22.651538	Sp-Hydin-3; Sp-Cyp27L	hydrocephalus-inducing protein homolog (LOC576233), mRNA	SPU_003506; SPU_024836	NA	Flagellar-associated PapD-like	NA
5.24343e-28	0.57981	0.487	0.244	8.16873e-24	apical plate	WHL22.271968	Sp-ColL	trinucleotide repeat-containing gene 6C protein (LOC581062), transcript variant X3, mRNA	SPU_021235	NA	NA	Adhesion_Collagen
1.33756e-27	0.579268	0.312	0.124	2.08378e-23	apical plate	WHL22.54311	Sp-Chaf1a	chromatin assembly factor 1 subunit A (LOC584359), transcript variant X1, mRNA	SPU_016101	NA	Chromatin assembly factor 1 subunit A; CAF1 complex subunit p150, region binding to CAF1-p60 at C-term; Chromatin assembly factor 1 complex p150 subunit, N-terminal	NA
1.64242e-27	0.706542	0.231	0.082	2.55873e-23	apical plate	WHL22.603529	Sp-C7orf63_1	cilia- and flagella-associated protein 69 (LOC592804), mRNA	SPU_015172	binding	NA	NA
2.11627e-27	0.253797	0.058	0.007	3.29694e-23	apical plate	WHL22.668613	Sp-Hypp_609; Sp-Form2h	uncharacterized LOC579678 (LOC579678), mRNA	SPU_010170; SPU_020333	NA	NA	NA
3.03243e-27	0.40049	0.121	0.027	4.72423e-23	apical plate	WHL22.534401	SPU_001466; Sp-Hypp_505; Sp-Hypp_1880; Sp-Pde4dipl; Sp-Pde4dipL_1	centrosome-associated protein CEP250-like (LOC586433), transcript variant X3, mRNA	SPU_001466; SPU_007018; SPU_009920; SPU_016227; SPU_024145	NA	NA	Unclassified
3.5501e-27	0.355347	0.093	0.018	5.5307e-23	apical plate	WHL22.86961	Sp-Auts2L	zinc finger CCCH domain-containing protein 13 (LOC754348), transcript variant X2, mRNA	SPU_028197	NA	Autism susceptibility gene 2 protein	NA
3.70596e-27	0.488691	0.603	0.353	5.77352e-23	apical plate	WHL22.470013	Sp-AhnakL	uncharacterized LOC105441578 (LOC105441578), mRNA	SPU_018932	NA	NA	NA
4.42587e-27	0.726384	0.294	0.117	6.89506e-23	apical plate	WHL22.432951	Sp-Serrp15	uncharacterized protein DDB_G0284459 (LOC577686), transcript variant X1, mRNA	SPU_007081	NA	NA	NA
4.87951e-27	0.725487	0.133	0.033	7.60179e-23	apical plate	WHL22.624200	Sp-Zzz3L	ZZ-type zinc finger-containing protein 3 (LOC584395), mRNA	SPU_018428	DNA binding; chromatin binding; zinc ion binding	Zinc finger, ZZ type; Myb-like DNA-binding domain	NA
5.31706e-27	0.572472	0.226	0.076	8.28345e-23	apical plate	WHL22.765051	Sp-CcLta1; SPU_028787	non L-type Cav channel (LOC574743), mRNA	SPU_011692; SPU_028787	ion transport; transmembrane transport; calcium ion transmembrane transport; ion channel activity; voltage-gated calcium channel activity; voltage-gated calcium channel complex; membrane	Ion transport protein; Voltage gated calcium channel IQ domain; Voltage-dependent L-type calcium channel, IQ-associated	CalciumToolkit
5.59225e-27	0.536062	0.133	0.033	8.71217e-23	apical plate	WHL22.105594	Sp-Dhx16_2	putative pre-mRNA-splicing factor ATP-dependent RNA helicase DHX16 (LOC763660), mRNA	SPU_025209	transport; ATP binding	Type II/IV secretion system protein; AAA domain; AAA domain	NA
6.69325e-27	0.278758	0.043	0.004	1.04274e-22	apical plate	WHL22.88366	Sp-Hdac6	histone deacetylase 6 (LOC100893415), transcript variant X5, mRNA	SPU_023572	NA	Histone deacetylase domain	Histone_Deacetylase
1.07618e-26	0.31823	0.108	0.023	1.67659e-22	apical plate	WHL22.506088	Sp-Khdrbh2	KH domain-containing, RNA-binding, signal transduction-associated protein 2 (LOC588527), transcript variant X2, misc_RNA	SPU_010056	RNA binding	Qua1 domain; KH domain	NA
1.47939e-26	0.443673	0.068	0.01	2.30474e-22	apical plate	WHL22.727902	SPU_009865; SPU_013247	slit homolog 1 protein (LOC580450), mRNA	SPU_009865; SPU_013247	protein binding	Low-density lipoprotein receptor domain class A	Unclassified
2.27956e-26	0.436335	0.148	0.039	3.55132e-22	apical plate	WHL22.74469	Sp-Hypp_2254	uncharacterized LOC589800 (LOC589800), transcript variant X2, mRNA	SPU_016246	NA	Clock interacting protein circadian	NA
2.60335e-26	0.563603	0.204	0.066	4.05576e-22	apical plate	WHL22.583760	Sp-Ythdc1; Sp-Hypp_221	YTH domain-containing protein 1 (LOC577966), transcript variant X3, mRNA	SPU_011266; SPU_024950	NA	YT521-B-like domain	Unclassified
2.6787e-26	0.433566	0.045	0.005	4.17315e-22	apical plate	WHL22.62835	WHL22.62835	ephrin type-B receptor 2 (LOC763632), transcript variant X1, mRNA	NA	NA	NA	NA
4.63403e-26	0.551477	0.146	0.039	7.21935e-22	apical plate	WHL22.708281	WHL22.708281	ubiquitin carboxyl-terminal hydrolase 2 (LOC100892282), mRNA	NA	NA	NA	NA
4.92845e-26	0.343818	0.085	0.016	7.67803e-22	apical plate	WHL22.55151	SPU_014298	fatty acid-binding protein, adipocyte-like (LOC580030), mRNA	SPU_014298	transport; transporter activity; lipid binding	Lipocalin / cytosolic fatty-acid binding protein family	Metabolism_Lipid
5.72798e-26	0.564722	0.274	0.103	8.92362e-22	apical plate	WHL22.470027	SPU_018931; Sp-AhnakL	vesicle-associated protein-like (LOC580388), transcript variant X2, mRNA	SPU_018931; SPU_018932	NA	NA	NA
6.26695e-26	0.414966	0.113	0.025	9.76328e-22	apical plate	WHL22.310362	Sp-Lrp12L_2	uncharacterized LOC579734 (LOC579734), mRNA	SPU_000620	protein binding	Low-density lipoprotein receptor domain class A; CUB domain; SEA domain	Unclassified
6.37352e-26	0.506278	0.224	0.077	9.9293e-22	apical plate	WHL22.660166	Sp-Mprot1L; Sp-Hypp_936	ribosome-binding protein 1 (LOC575651), mRNA	SPU_009230; SPU_019324	proteolysis; catalytic activity; metalloendopeptidase activity; protein binding; metal ion binding	Peptidase M16 inactive domain; Insulinase (Peptidase family M16); CUB domain	Metalloprotease
6.57163e-26	0.6173	0.111	0.025	1.02379e-21	apical plate	WHL22.213534	Sp-5ht7	5-hydroxytryptamine receptor 1D-like (LOC581142), mRNA	SPU_005097	G-protein coupled receptor signaling pathway; G-protein coupled receptor activity; serotonin receptor activity; integral component of plasma membrane; integral component of membrane	7 transmembrane receptor (rhodopsin family); Serpentine type 7TM GPCR chemoreceptor Srsx; Serpentine type 7TM GPCR chemoreceptor Srx	CalciumToolkit
7.04491e-26	0.547863	0.347	0.149	1.09753e-21	apical plate	WHL22.147840	SPU_006199	ubiquitin-conjugating enzyme E2 D3 (LOC575665), transcript variant X2, mRNA	SPU_006199	acid-amino acid ligase activity	Ubiquitin-conjugating enzyme	Ubiquitin_Modifier
7.67987e-26	0.535445	0.186	0.058	1.19645e-21	apical plate	WHL22.368440	Sp-Z150	zinc finger protein 761 (LOC580050), mRNA	SPU_012912	nucleic acid binding; metal ion binding	Zinc finger, C2H2 type; C2H2-type zinc-finger domain; Zinc-finger double domain	ZincFinger
7.70396e-26	0.338782	0.085	0.016	1.2002e-21	apical plate	WHL22.654444	Sp-Fam20c_1	extracellular serine/threonine protein kinase FAM20C (LOC586575), mRNA	SPU_013763	NA	Golgi casein kinase, C-terminal, Fam20; FAM198 protein	Homolog-of-gene-with-unknown-function
8.20034e-26	0.486696	0.206	0.067	1.27753e-21	apical plate	WHL22.699386	SPU_025001	dynactin subunit 3 (LOC577427), mRNA	SPU_025001	NA	Dynactin subunit p22	Cytoskeleton_Dynactin
8.33932e-26	0.602242	0.176	0.054	1.29918e-21	apical plate	WHL22.559716	Sp-Dnah9; SPU_027327; Sp-Axndhc9h	dynein beta chain, ciliary (LOC581088), mRNA	SPU_027326; SPU_027327; SPU_030230	DNA recombination; microtubule-based movement; DNA integration; DNA binding; microtubule motor activity; ATP binding; ATPase activity	Dynein heavy chain, N-terminal region 1; Hydrolytic ATP binding site of dynein motor region; Dynein heavy chain, N-terminal region 2	NA
9.02524e-26	0.624737	0.304	0.127	1.40604e-21	apical plate	WHL22.530577	Sp-Man1a2_2	mannosyl-oligosaccharide 1,2-alpha-mannosidase IB-like (LOC577504), mRNA	SPU_006257	mannosyl-oligosaccharide 1;2-alpha-mannosidase activity; calcium ion binding; membrane	Glycosyl hydrolase family 47	Hydrolase
9.29197e-26	0.657747	0.497	0.278	1.4476e-21	apical plate	WHL22.673823	SPU_003459; Sp-Brd; SPU_016632; Sp-Brd2	bromodomain-containing protein 2 (LOC100892105), transcript variant X4, mRNA	SPU_003459; SPU_006720; SPU_016632; SPU_018831	protein binding	Bromodomain	Unclassified
1.18011e-25	0.353167	0.075	0.013	1.83849e-21	apical plate	WHL22.731777	SPU_007554	latrophilin-2 (LOC100890920), mRNA	SPU_007554	cell surface receptor signaling pathway; G-protein coupled receptor signaling pathway; transmembrane signaling receptor activity; G-protein coupled receptor activity; membrane; integral component of membrane	7 transmembrane receptor (Secretin family)	NA
1.20557e-25	0.332791	0.09	0.018	1.87816e-21	apical plate	WHL22.313870	Sp-B4galt6; Sp-B4galt6_3	beta-1,4-galactosyltransferase 6 (LOC576421), transcript variant X2, mRNA	SPU_008080; SPU_016569	carbohydrate metabolic process; transferase activity; transferring glycosyl groups	N-terminal region of glycosyl transferase group 7; N-terminal domain of galactosyltransferase	Metabolism_Carbohydrate
1.56548e-25	0.324689	0.068	0.011	2.43885e-21	apical plate	WHL22.319167	Sp-Cacna2d2	uncharacterized LOC105441550 (LOC105441550), mRNA	SPU_013966	NA	Neuronal voltage-dependent calcium channel alpha 2acd; VWA N-terminal; Cache domain	CalciumToolkit
2.70269e-25	0.501031	0.093	0.019	4.21052e-21	apical plate	WHL22.657609	Sp-Cbfb	Runx transcription factor dimeric partner CBF-beta (LOC574826), mRNA	SPU_027734	transcription coactivator activity; nucleus	Core binding factor beta subunit	NA
3.15435e-25	0.423074	0.09	0.018	4.91416e-21	apical plate	WHL22.123772	Sp-Hypp_125	uncharacterized LOC100892537 (LOC100892537), transcript variant X2, mRNA	SPU_016223	NA	Jhy protein	NA
4.70945e-25	0.387188	0.088	0.017	7.33685e-21	apical plate	WHL22.226508	WHL22.226508	tyrosyl-DNA phosphodiesterase 1 (LOC100891207), transcript variant X2, mRNA	NA	NA	NA	NA
4.88931e-25	0.520043	0.209	0.07	7.61706e-21	apical plate	WHL22.641171	Sp-C6orf103; Sp-Hypp_2050; SPU_013386; Sp-C6orf103L	androglobin (LOC754582), transcript variant X18, mRNA	SPU_007700; SPU_012795; SPU_013386; SPU_013387	oxygen transport; iron ion binding; oxygen binding; heme binding	Globin	NA
4.98042e-25	0.546008	0.266	0.102	7.759e-21	apical plate	WHL22.194961	SPU_023916; Sp-Hypp_1126	trichohyalin (LOC591791), transcript variant X4, mRNA	SPU_023916; SPU_024776	protein binding; zinc ion binding	LIM domain	NA
6.46477e-25	0.431414	0.113	0.026	1.00715e-20	apical plate	WHL22.591306	Sp-Rnpc1L_1; Sp-Rnpc1L	RNA-binding protein 38-like (LOC584380), transcript variant X2, mRNA	SPU_017903; SPU_028480	nucleotide binding; nucleic acid binding	RNA recognition motif. (a.k.a. RRM, RBD, or RNP domain)	Unclassified
7.27449e-25	0.328464	0.106	0.023	1.13329e-20	apical plate	WHL22.455945	Sp-Ape; SPU_026257	DNA-(apurinic or apyrimidinic site) lyase (LOC584564), transcript variant X1, mRNA	SPU_014959; SPU_026257	DNA repair; DNA binding; nuclease activity; endonuclease activity; intracellular	Alcohol dehydrogenase transcription factor Myb/SANT-like; Endonuclease/Exonuclease/phosphatase family	NA
7.98036e-25	0.475714	0.118	0.028	1.24326e-20	apical plate	WHL22.651159	Sp-Hypp_7048	ankyrin repeat domain-containing protein SOWAHB (LOC575096), mRNA	SPU_012762	NA	NA	NA
8.36888e-25	0.313114	0.04	0.004	1.30379e-20	apical plate	WHL22.371276	Sp-Cstf3	cleavage stimulation factor subunit 3 (LOC591939), mRNA	SPU_025144	mRNA processing; RNA processing; intracellular; nucleus	Suppressor of forked protein (Suf)	Metabolism_IronSulfurProtein
1.01819e-24	0.500204	0.173	0.053	1.58625e-20	apical plate	WHL22.748383	Sp-Lfng; Sp-Fringe	beta-1,3-N-acetylglucosaminyltransferase radical fringe (LOC578181), transcript variant X1, mRNA	SPU_004621; SPU_023905	calcium ion binding; transferase activity; transferring glycosyl groups; membrane	Fringe-like	Signaling_Notch
1.25652e-24	0.298542	0.068	0.011	1.95753e-20	apical plate	WHL22.661157	Sp-Sh3bp2	SH3 domain-binding protein 2 (LOC582766), transcript variant X4, mRNA	SPU_022575	protein binding	PH domain; SH2 domain	NA
1.67127e-24	0.496303	0.304	0.124	2.60366e-20	apical plate	WHL22.521303	Sp-Hypp_772	putative golgin subfamily A member 6-like protein 6 (LOC752318), partial mRNA	SPU_015150	NA	Lamina-associated polypeptide 1C (LAP1C)	NA
1.95697e-24	0.317569	0.103	0.023	3.04876e-20	apical plate	WHL22.738035	Sp-Cramp1L	protein cramped-like (LOC100888549), mRNA	SPU_003831	DNA binding; chromatin binding	NA	NA
2.98258e-24	0.334517	0.095	0.02	4.64656e-20	apical plate	WHL22.26341	Sp-Enpp3_1	venom phosphodiesterase 2 (LOC591232), mRNA	SPU_005592	metabolic process; catalytic activity	Type I phosphodiesterase / nucleotide pyrophosphatase	Hydrolase
4.00818e-24	0.410327	0.116	0.028	6.24435e-20	apical plate	WHL22.741923	Sp-Oach	nose resistant to fluoxetine protein 6 (LOC762899), transcript variant X1, mRNA	SPU_018677	transferase activity; transferring acyl groups other thanamino-acyl groups	Acyltransferase family	Transferase
4.64895e-24	0.570249	0.146	0.041	7.2426e-20	apical plate	WHL22.257207	Sp-Son	protein SON (LOC592681), transcript variant X2, mRNA	SPU_018720	nucleic acid binding	G-patch domain; Double-stranded RNA binding motif; double strand RNA binding domain from DEAD END PROTEIN 1	NA
4.69624e-24	0.264888	0.03	0.002	7.31627e-20	apical plate	WHL22.45758	SPU_017996	NA	SPU_017996	nucleotide binding; nucleic acid binding	RNA recognition motif. (a.k.a. RRM, RBD, or RNP domain)	Unclassified
5.7664e-24	0.486035	0.176	0.056	8.98348e-20	apical plate	WHL22.769812	Sp-Efcab5	EF-hand calcium-binding domain-containing protein 5 (LOC588946), mRNA	SPU_003919	calcium ion binding	EF hand; EF-hand domain; EF-hand domain pair	CalciumToolkit_CalciumBinding
6.00229e-24	0.427105	0.113	0.027	9.35097e-20	apical plate	WHL22.171231	Sp-Magi2; Sp-Magi	membrane-associated guanylate kinase, WW and PDZ domain-containing protein 2 (LOC752750), transcript variant X1, mRNA	SPU_017514; SPU_018806	protein binding	PDZ domain; PDZ domain; PDZ domain	Unclassified
8.52824e-24	0.590775	0.405	0.202	1.32861e-19	apical plate	WHL22.220380	Sp-Mlck; Sp-Mlck_1; Sp-Mlck1; Sp-Mlcka	myosin light chain kinase, smooth muscle (LOC581963), transcript variant X3, mRNA	SPU_008085; SPU_019751; SPU_023875; SPU_023876	protein phosphorylation; protein kinase activity; protein serine/threonine kinase activity; protein binding; ATP binding; transferase activity; transferring phosphorus-containing groups	Protein kinase domain; Immunoglobulin I-set domain; Protein tyrosine kinase	NA
8.5747e-24	0.416827	0.106	0.024	1.33585e-19	apical plate	WHL22.173145	Sp-Hypp_152	plectin (LOC588694), mRNA	SPU_019310	protein binding	Variant SH3 domain; Variant SH3 domain	NA
8.7839e-24	0.297497	0.101	0.022	1.36844e-19	apical plate	WHL22.492495	Sp-Ttc7b; SPU_011942	tetratricopeptide repeat protein 7B (LOC578959), transcript variant X5, mRNA	SPU_004719; SPU_011942	protein binding	Tetratricopeptide repeat; Tetratricopeptide repeat; Tetratricopeptide repeat	Unclassified
9.59246e-24	0.56249	0.271	0.108	1.49441e-19	apical plate	WHL22.639765	Sp-Tanc2; Sp-Pkci	protein kinase C iota type (LOC581257), transcript variant X4, mRNA	SPU_008179; SPU_008180	protein binding	PB1 domain	NA
1.11981e-23	0.350659	0.118	0.029	1.74454e-19	apical plate	WHL22.479556	SPU_018370	protein LIAT1-like (LOC100889151), transcript variant X1, mRNA	SPU_018370	NA	NA	NA
1.25859e-23	0.316358	0.065	0.011	1.96076e-19	apical plate	WHL22.605059	SPU_006791; SPU_006792; SPU_006793	uncharacterized LOC581446 (LOC581446), mRNA	SPU_006791; SPU_006792; SPU_006793	NA	NA	NA
1.51052e-23	0.401393	0.146	0.041	2.35323e-19	apical plate	WHL22.658391	Sp-Rhpn1	rhophilin-2 (LOC580747), transcript variant X2, mRNA	SPU_012299	signal transduction; protein binding	BRO1-like domain; Hr1 repeat; PDZ domain	NA
1.8486e-23	0.461812	0.211	0.073	2.87993e-19	apical plate	WHL22.315865	Sp-Hypp_2134	uncharacterized LOC592490 (LOC592490), transcript variant X1, mRNA	SPU_014155	NA	NA	NA
2.01187e-23	0.641995	0.204	0.071	3.13429e-19	apical plate	WHL22.55352	Sp-Hypp_267	AT-rich interactive domain-containing protein 4A (LOC589247), mRNA	SPU_027403	NA	RNA binding activity-knot of a chromodomain	NA
2.54035e-23	0.276013	0.05	0.007	3.95761e-19	apical plate	WHL22.435963	WHL22.435963	uncharacterized LOC100891189 (LOC100891189), mRNA	NA	NA	NA	NA
3.16865e-23	0.43823	0.276	0.109	4.93645e-19	apical plate	WHL22.89800	Sp-Ptb; SPU_012409	polypyrimidine tract-binding protein 1 (LOC574897), transcript variant X6, mRNA	SPU_000961; SPU_012409	mRNA processing; nucleotide binding; nucleic acid binding; RNA binding; nucleus	RNA recognition motif. (a.k.a. RRM, RBD, or RNP domain); RNA recognition motif. (a.k.a. RRM, RBD, or RNP domain); RRM-like domain	Unclassified
3.40984e-23	0.519284	0.686	0.547	5.31219e-19	apical plate	WHL22.735798	Sp-Gs	guanine nucleotide-binding protein G(s) alpha subunit (LOC414053), mRNA	SPU_007485	GTP catabolic process; signal transduction; G-protein coupled receptor signaling pathway; GTPase activity; signal transducer activity; GTP binding; guanyl nucleotide binding; G-protein beta/gamma-subunit complex binding	G-protein alpha subunit; ADP-ribosylation factor family; Gtr1/RagA G protein conserved region	Fertilization
3.42979e-23	0.423243	0.143	0.041	5.34328e-19	apical plate	WHL22.208359	SPU_014956; Sp-Epb4.1L5; SPU_015334	band 4.1-like protein 5 (LOC583383), transcript variant X6, mRNA	SPU_014956; SPU_014957; SPU_015334	cytoskeleton	FERM N-terminal domain; FERM central domain	Unclassified
3.52348e-23	0.403847	0.108	0.026	5.48923e-19	apical plate	WHL22.698752	Sp-PaxB	paired box protein (suPaxB), mRNA	SPU_018351	regulation of transcription; DNA-templated; DNA binding	'Paired box' domain	Nervous_Placode
3.7317e-23	0.635827	0.211	0.076	5.81362e-19	apical plate	WHL22.325652	Sp-Setd2	microtubule-associated protein futsch (LOC578079), transcript variant X2, mRNA	SPU_004588	regulation of transcription; DNA-templated; histone lysine methylation; protein binding; histone-lysine N-methyltransferase activity; nucleus; chromosome	SRI (Set2 Rpb1 interacting) domain; SET domain; WW domain	Unclassified
3.78662e-23	0.565888	0.224	0.082	5.89918e-19	apical plate	WHL22.5759	Sp-Dcdc2	doublecortin domain-containing protein 2 (LOC100890540), transcript variant X3, mRNA	SPU_002011	intracellular signal transduction	Doublecortin	Unclassified
4.1034e-23	0.572923	0.166	0.052	6.39268e-19	apical plate	WHL22.680872	Sp-Hypp_293; Sp-Hypp_353; Sp-Hypp_740; SPU_015028; Sp-Hypp_2471	interaptin (LOC588428), mRNA	SPU_000094; SPU_002336; SPU_014171; SPU_015028; SPU_019901	NA	NA	NA
4.54441e-23	0.278079	0.093	0.02	7.07973e-19	apical plate	WHL22.286588	SPU_003347; Sp-Dusp16	tyrosine-protein phosphatase vhp-1 (LOC582330), transcript variant X3, mRNA	SPU_003347; SPU_003348	NA	Rhodanese-like domain	NA
4.57894e-23	0.412463	0.095	0.021	7.13352e-19	apical plate	WHL22.595420	Sp-Rar	retinoic acid receptor alpha-A (LOC574567), mRNA	SPU_016523	regulation of transcription; DNA-templated; steroid hormone mediated signaling pathway; retinoic acid receptor signaling pathway; DNA binding; sequence-specific DNA binding transcription factoractivity; steroid hormone receptor activity; retinoic acid receptor activity; zinc ion binding; sequence-specific DNA binding; nucleus	Zinc finger, C4 type (two domains); Ligand-binding domain of nuclear hormone receptor	TranscriptionFactor_NR
4.87401e-23	0.380073	0.118	0.03	7.59322e-19	apical plate	WHL22.539631	Sp-Ebr1; Sp-Ebr1_2; Sp-Ebr1_1	egg bindin receptor 1 (ebr1), mRNA	SPU_000526; SPU_008369; SPU_018112	proteolysis; metalloendopeptidase activity; metallopeptidase activity; zinc ion binding	HYR domain; CUB domain; Thrombospondin type 1 domain	Oogenesis
5.41212e-23	0.266813	0.07	0.012	8.43154e-19	apical plate	WHL22.421251	Sp-Lsm14A; Sp-Lsm14A_1	protein LSM14 homolog A (LOC580634), transcript variant X1, mRNA	SPU_013727; SPU_013728	NA	Scd6-like Sm domain; Ataxin 2 SM domain	NA
6.17666e-23	0.514196	0.302	0.127	9.62262e-19	apical plate	WHL22.226225	SPU_017010; Sp-Dnamth	DNA (cytosine-5)-methyltransferase PliMCI (LOC574665), transcript variant X1, mRNA	SPU_017010; SPU_023599	DNA methylation; DNA binding; methyltransferase activity	C-5 cytosine-specific DNA methylase	NucleicAcid_Modification
6.79867e-23	0.292451	0.065	0.011	1.05916e-18	apical plate	WHL22.456756	Sp-Brip1	Fanconi anemia group J protein homolog (LOC576476), mRNA	SPU_003472	DNA binding; ATP-dependent DNA helicase activity; ATP binding; hydrolase activity; acting on acid anhydrides; hydrolase activity; acting on acid anhydrides; inphosphorus-containing anhydrides	DEAD_2; DEAD/DEAH box helicase	Unclassified
7.24416e-23	0.307979	0.088	0.018	1.12857e-18	apical plate	WHL22.388067	Sp-Inpp5a_1	uncharacterized LOC100892579 (LOC100892579), ncRNA	SPU_015963	NA	NA	Phosphatase_Inositol
8.23986e-23	0.350925	0.116	0.029	1.28369e-18	apical plate	WHL22.472264	SPU_011757; SPU_017803; Sp-Ncaph1	condensin-2 complex subunit H2 (LOC584403), transcript variant X1, mRNA	SPU_011757; SPU_017803; SPU_025864	NA	Condensin II complex subunit CAP-H2 or CNDH2, C-term	Homolog-of-gene-with-unknown-function
8.92415e-23	0.318292	0.098	0.022	1.39029e-18	apical plate	WHL22.531818	Sp-Gsc	goosecoid transcription factor (Gsc), mRNA	SPU_015982	regulation of transcription; DNA-templated; DNA binding; sequence-specific DNA binding transcription factoractivity; sequence-specific DNA binding; nucleus	Homeodomain	TranscriptionFactor_Homeo
1.54805e-22	0.310619	0.068	0.012	2.41171e-18	apical plate	WHL22.461697	Sp-Hypp_15; Sp-Hypp_16	uncharacterized LOC100888570 (LOC100888570), mRNA	SPU_006284; SPU_006285	NA	Transglutaminase-like superfamily	Unclassified
1.57506e-22	0.404265	0.141	0.04	2.45378e-18	apical plate	WHL22.754172	Sp-Efhb	EF-hand domain-containing family member B (LOC578680), mRNA	SPU_012115	calcium ion binding	EF hand; EF-hand domain; EF-hand domain pair	Unclassified
1.6074e-22	0.451514	0.151	0.045	2.50417e-18	apical plate	WHL22.374781	Sp-Alox5_8; SPU_018637	arachidonate 5-lipoxygenase (LOC583823), mRNA	SPU_018636; SPU_018637	oxidation-reduction process; protein binding; oxidoreductase activity; acting on single donors withincorporation of molecular oxygen; incorporation of two atoms of oxygen; metal ion binding	Lipoxygenase; PLAT/LH2 domain	Oxygenase
1.86845e-22	0.444542	0.219	0.079	2.91085e-18	apical plate	WHL22.705061	WHL22.705061	scavenger receptor cysteine-rich type 1 protein M130 (LOC764257), transcript variant X2, mRNA	NA	NA	NA	NA
2.20749e-22	0.447782	0.065	0.011	3.43905e-18	apical plate	WHL22.741771	Sp-Oca2	P protein (LOC575044), mRNA	SPU_028807	transmembrane transport; integral component of membrane	Citrate transporter; Sodium:sulfate symporter transmembrane region; Arsenical pump membrane protein	Metabolism_InorganicIon
3.08476e-22	0.365367	0.078	0.015	4.80575e-18	apical plate	WHL22.122167	Sp-Nek8b	uncharacterized LOC100892600 (LOC100892600), mRNA	SPU_010590	NA	Regulator of chromosome condensation (RCC1) repeat; Protein kinase domain; Protein tyrosine kinase	Kinase_Other
3.15056e-22	0.543318	0.186	0.063	4.90826e-18	apical plate	WHL22.495958	SPU_007704; Sp-Ack1; SPU_018215; Sp-Ack1_1	tyrosine-protein kinase PR2 (LOC587777), transcript variant X2, mRNA	SPU_007704; SPU_016505; SPU_018215; SPU_028412	NA	NA	NA
3.20167e-22	0.355142	0.088	0.019	4.98787e-18	apical plate	WHL22.607870	SPU_023978	catenin delta-2-like (LOC105447468), mRNA	SPU_023978	single organismal cell-cell adhesion	NA	NA
3.5572e-22	0.398375	0.176	0.057	5.54176e-18	apical plate	WHL22.268265	Sp-Ccdc149	protein FAM53A (LOC100887882), mRNA	SPU_025247	NA	Uncharacterized coiled-coil protein (DUF2353)	Homolog-of-gene-with-unknown-function
4.52253e-22	0.468487	0.113	0.029	7.04565e-18	apical plate	WHL22.43820	Sp-Ect2	protein ECT2 (LOC576544), transcript variant X1, mRNA	SPU_014908	cell morphogenesis; cytokinesis; regulation of Rho protein signal transduction; intracellular signal transduction; positive regulation of neuron differentiation; guanyl-nucleotide exchange factor activity; Rho guanyl-nucleotide exchange factor activity; GTPase activator activity; nucleus; cytoplasm	RhoGEF domain; twin BRCT domain; BRCA1 C Terminus (BRCT) domain	GTPase_RhoRegulator_RhoGEFDH
8.79282e-22	0.430884	0.153	0.047	1.36983e-17	apical plate	WHL22.657327	Sp-Rpgrip1L; Sp-Rpgrip1L_2	protein fantom (LOC585739), transcript variant X4, mRNA	SPU_013890; SPU_016221	protein binding	First C2 domain of RPGR-interacting protein 1; Retinitis pigmentosa G-protein regulator interacting C-terminal; C2 domain	Unclassified
9.62786e-22	0.464629	0.08	0.016	1.49992e-17	apical plate	WHL22.240277	Sp-Dhx29	ATP-dependent RNA helicase DHX29 (LOC588393), mRNA	SPU_008786	nucleic acid binding; helicase activity; ATP binding; ATP-dependent helicase activity	Oligonucleotide/oligosaccharide-binding (OB)-fold; Helicase associated domain (HA2); Helicase conserved C-terminal domain	NucleicAcid_Helicase
1.12281e-21	0.482782	0.188	0.066	1.74922e-17	apical plate	WHL22.26680	WHL22.26680	uncharacterized LOC100891249 (LOC100891249), mRNA	NA	NA	NA	NA
1.2927e-21	0.327745	0.058	0.009	2.01389e-17	apical plate	WHL22.311252	SPU_024909	uncharacterized LOC100888984 (LOC100888984), mRNA	SPU_024909	sulfotransferase activity	Sulfotransferase domain; Sulfotransferase family	NA
1.3772e-21	0.483692	0.294	0.128	2.14554e-17	apical plate	WHL22.241394	Sp-Wdr60	transposon Tf2-1 polyprotein (LOC100893111), mRNA	SPU_000243	protein binding	NA	Unclassified
1.56264e-21	0.458982	0.271	0.112	2.43443e-17	apical plate	WHL22.588565	Sp-Cnas; Sp-Cnbs; Sp-Cn	serine/threonine-protein phosphatase 2B catalytic subunit alpha isoform (LOC588695), transcript variant X7, mRNA	SPU_010511; SPU_016657; SPU_018404	hydrolase activity	Calcineurin-like phosphoesterase	CalciumToolkit
1.75893e-21	0.358994	0.118	0.031	2.74024e-17	apical plate	WHL22.656456	SPU_004120	uncharacterized LOC105447612 (LOC105447612), ncRNA	SPU_004120	NA	NA	NA
1.84566e-21	0.390623	0.136	0.039	2.87535e-17	apical plate	WHL22.224436	Sp-Hypp_454; Sp-Hypp_516	zinc finger CCCH domain-containing protein 14 (LOC575638), mRNA	SPU_005568; SPU_007458	metal ion binding	RNA-binding, Nab2-type zinc finger	NA
2.01044e-21	0.553189	0.118	0.032	3.13206e-17	apical plate	WHL22.201172	SPU_027670	storkhead-box protein 1-like (LOC100888346), mRNA	SPU_027670	NA	NA	NA
2.34531e-21	0.394275	0.146	0.044	3.65376e-17	apical plate	WHL22.303603	Sp-Cnot4L	CCR4-NOT transcription complex subunit 4 (LOC574702), mRNA	SPU_020306	nucleotide binding; nucleic acid binding; protein binding; zinc ion binding; metal ion binding	RING/Ubox like zinc-binding domain; Ankyrin repeats (3 copies); Ankyrin repeats (many copies)	Unclassified
2.76965e-21	0.269888	0.06	0.01	4.31483e-17	apical plate	WHL22.672997	Sp-Hypp_470	uncharacterized LOC100893121 (LOC100893121), mRNA	SPU_006156	protein binding; zinc ion binding; intracellular	RING-type zinc-finger; zinc finger of C3HC4-type, RING; Zinc finger, C3HC4 type (RING finger)	NA
3.69133e-21	0.368315	0.088	0.019	5.75072e-17	apical plate	WHL22.329331	Sp-Whirlin	uncharacterized LOC575423 (LOC575423), mRNA	SPU_021200	protein binding	PDZ domain; PDZ domain; PDZ domain	Unclassified
3.98316e-21	0.434693	0.259	0.105	6.20536e-17	apical plate	WHL22.725158	Sp-Kiaa1267L	KAT8 regulatory NSL complex subunit 1 (LOC582039), transcript variant X1, mRNA	SPU_021036	histone acetyltransferase complex	PEHE domain	NA
5.04916e-21	0.395916	0.093	0.022	7.86609e-17	apical plate	WHL22.101043	WHL22.101043	uncharacterized LOC100888868 (LOC100888868), mRNA	NA	NA	NA	NA
5.44436e-21	0.61945	0.503	0.308	8.48177e-17	apical plate	WHL22.194915	Sp-CttnL	Na(+)/H(+) exchange regulatory cofactor NHE-RF1 (LOC763547), transcript variant X1, mRNA	SPU_019169	protein binding	PDZ domain; PDZ domain	Unclassified
5.45776e-21	0.543726	0.42	0.224	8.50264e-17	apical plate	WHL22.17913	SPU_013582	immediate early response gene 5-like protein (LOC100888257), mRNA	SPU_013582	NA	Immediate early response protein (IER)	NA
5.79884e-21	0.396382	0.781	0.63	9.03401e-17	apical plate	WHL22.521616	SPU_019863	calmodulin-beta (LOC591437), mRNA	SPU_019863	calcium ion binding	EF hand; EF-hand domain pair; EF-hand domain	Unclassified
6.47053e-21	0.367936	0.113	0.029	1.00804e-16	apical plate	WHL22.436319	Sp-Tmem26_5	transmembrane protein 26 (LOC593206), mRNA	SPU_024582	NA	Transmembrane protein 26	Transmembrane
9.03194e-21	0.519196	0.261	0.11	1.40709e-16	apical plate	WHL22.525885	Sp-Hypp_1585; Sp-CacTta1Hs	two pore calcium channel protein 1 (LOC582914), transcript variant X3, mRNA	SPU_005494; SPU_014334	protein binding	SH3 domain; Variant SH3 domain; Variant SH3 domain	Unclassified
1.1758e-20	0.265353	0.045	0.006	1.83178e-16	apical plate	WHL22.259905	Sp-Lrrcc1_1; Sp-Lrrcc1	leucine-rich repeat and coiled-coil domain-containing protein 1 (LOC589182), mRNA	SPU_022789; SPU_024056	protein binding	Leucine Rich repeats (2 copies); Leucine rich repeat; Leucine-rich repeat	Channel_Sodium
1.34568e-20	0.504358	0.394	0.201	2.09644e-16	apical plate	WHL22.206206	SPU_011011; Sp-Afdn; Sp-Mllt4; Sp-TchhL	afadin (LOC589923), transcript variant X2, mRNA	SPU_011011; SPU_023856; SPU_025904; SPU_025905	signal transduction	Ras association (RalGDS/AF-6) domain	Dehydrogenase
1.40051e-20	0.2573	0.075	0.015	2.18186e-16	apical plate	WHL22.609213	Sp-Btbd7	BTB/POZ domain-containing protein 7 (LOC578070), mRNA	SPU_004528	protein binding	BTB/POZ domain; BTB And C-terminal Kelch	Unclassified
1.54496e-20	0.568299	0.211	0.08	2.4069e-16	apical plate	WHL22.423673	Sp-Hypp_1991	hepatoma-derived growth factor-related protein 2 (LOC763089), mRNA	SPU_028916	NA	Lens epithelium-derived growth factor (LEDGF); PWWP domain	Unclassified
1.55837e-20	0.546105	0.214	0.082	2.42778e-16	apical plate	WHL22.150931	Sp-Mak	serine/threonine-protein kinase MAK (LOC591372), mRNA	SPU_025893	protein phosphorylation; protein kinase activity; protein serine/threonine kinase activity; ATP binding; transferase activity; transferring phosphorus-containing groups	Protein kinase domain; Protein tyrosine kinase	Kinase_CMGC
1.8111e-20	0.406311	0.111	0.029	2.82151e-16	apical plate	WHL22.516816	Sp-Gal3st1_1	galactosylceramide sulfotransferase (LOC578919), transcript variant X5, misc_RNA	SPU_006168	biosynthetic process; galactosylceramide sulfotransferase activity; Golgi apparatus; integral component of membrane	Galactose-3-O-sulfotransferase	Transferase
2.0554e-20	0.457702	0.121	0.033	3.2021e-16	apical plate	WHL22.632027	SPU_028413; Sp-Hypp_2954	uncharacterized LOC575620 (LOC575620), transcript variant X3, mRNA	SPU_028413; SPU_028414	NA	NA	NA
2.48369e-20	0.283865	0.04	0.005	3.86933e-16	apical plate	WHL22.37039	Sp-Hypp_1299; Sp-Syde1	rho GTPase-activating protein 100F (LOC590613), mRNA	SPU_001007; SPU_001939	protein binding	PDZ domain	Unclassified
2.57497e-20	0.34915	0.05	0.008	4.01155e-16	apical plate	WHL22.136737	SPU_028875	NA	SPU_028875	protein binding	von Willebrand factor type C domain	BloodProtein
2.66808e-20	0.336423	0.118	0.032	4.1566e-16	apical plate	WHL22.389481	Sp-Hypp_912	proteoglycan 4 (LOC100892783), transcript variant X2, mRNA	SPU_018255	zinc ion binding	LIM domain	NA
3.25089e-20	0.260022	0.07	0.014	5.06456e-16	apical plate	WHL22.60780	Sp-Srf	serum response factor (LOC592160), transcript variant X1, mRNA	SPU_027774	DNA binding; protein dimerization activity	SRF-type transcription factor (DNA-binding and dimerisation domain)	TranscriptionFactor_Other
3.77011e-20	0.38142	0.146	0.045	5.87345e-16	apical plate	WHL22.426823	Sp-Abcb1A; SPU_025844; Sp-Abcb1_3	egg permeability glycoprotein (ABCB1), transcript variant X2, mRNA	SPU_001752; SPU_025844; SPU_027647	transport; transmembrane transport; nucleotide binding; ATP binding; ATPase activity; nucleoside-triphosphatase activity; ATPase activity; coupled to transmembrane movement ofsubstances; integral component of membrane	ABC transporter transmembrane region; ABC transporter; RecF/RecN/SMC N terminal domain	Defensome_ABCTransporter
3.89733e-20	0.490487	0.085	0.019	6.07165e-16	apical plate	WHL22.495543	Sp-Phf17_1; Sp-Phf17	protein Jade-1 (LOC594182), mRNA	SPU_016355; SPU_024129	protein binding; zinc ion binding	PHD-zinc-finger like domain; PHD-finger; PHD-like zinc-binding domain	NA
3.91232e-20	0.365121	0.065	0.012	6.09501e-16	apical plate	WHL22.461738	SPU_001209; Sp-Hypp_146	uncharacterized LOC100888699 (LOC100888699), transcript variant X1, mRNA	SPU_001209; SPU_019083	NA	ElonginA binding-protein 1	NA
6.24416e-20	0.321209	0.085	0.019	9.72777e-16	apical plate	WHL22.254030	Sp-Lkb1/Xeek1	serine/threonine-protein kinase stk11 (LOC575272), mRNA	SPU_022284	protein phosphorylation; protein kinase activity; protein serine/threonine kinase activity; ATP binding; transferase activity; transferring phosphorus-containing groups	Protein kinase domain; Protein tyrosine kinase; Kinase-like	Kinase_CAMK
6.89558e-20	0.33544	0.113	0.03	1.07426e-15	apical plate	WHL22.651130	Sp-IrxA	iroquois homeobox A (IrxA), mRNA	SPU_010351	regulation of transcription; DNA-templated; DNA binding; sequence-specific DNA binding transcription factoractivity; sequence-specific DNA binding; nucleus	Homeobox KN domain; Homeodomain	Nervous_Retinal
8.13627e-20	0.370964	0.073	0.015	1.26755e-15	apical plate	WHL22.24896	Sp-Saps3_1; Sp-Saps3	serine/threonine-protein phosphatase 6 regulatory subunit 3 (LOC575241), transcript variant X2, mRNA	SPU_016393; SPU_016394	binding	SIT4 phosphatase-associated protein	Unclassified
1.03312e-19	0.436933	0.113	0.031	1.60949e-15	apical plate	WHL22.400345	SPU_007132	uncharacterized LOC105440729 (LOC105440729), ncRNA	SPU_007132	NA	NA	NA
1.06928e-19	0.529985	0.427	0.23	1.66583e-15	apical plate	WHL22.682404	Sp-Armc4; Sp-Armc4-2	armadillo repeat-containing protein 4 (LOC589555), transcript variant X1, mRNA	SPU_004121; SPU_007521	binding; protein binding	Armadillo/beta-catenin-like repeat; HEAT repeats; Adaptin N terminal region	Unclassified
1.20936e-19	0.383008	0.111	0.03	1.88406e-15	apical plate	WHL22.708660	Sp-Hypp_610	uncharacterized LOC100892718 (LOC100892718), mRNA	SPU_010171	protein binding	F-box-like	CellCycle_Cyclin
1.60018e-19	0.535871	0.118	0.034	2.49292e-15	apical plate	WHL22.641632	Sp-Atp/Gtpbp1_1	cytosolic carboxypeptidase 2 (LOC580601), transcript variant X8, mRNA	SPU_016331	proteolysis; metallocarboxypeptidase activity; zinc ion binding	Cytosolic carboxypeptidase N-terminal domain; Zinc carboxypeptidase	Metalloprotease
2.13256e-19	0.549201	0.324	0.156	3.32232e-15	apical plate	WHL22.241011	Sp-Ubn2	ubinuclein-2 (LOC579948), transcript variant X1, mRNA	SPU_000322	NA	Ubinuclein conserved middle domain; HPC2 and ubinuclein domain	NA
2.26413e-19	0.398133	0.108	0.029	3.5273e-15	apical plate	WHL22.660165	Sp-Ankrd26L; Sp-Ankrd26L_2	ankyrin repeat domain-containing protein 26 (LOC584408), transcript variant X2, mRNA	SPU_004455; SPU_020238	protein binding	CCDC144C protein coiled-coil region; Ankyrin repeats (3 copies); Ankyrin repeats (many copies)	Unclassified
2.34064e-19	0.312629	0.08	0.018	3.64649e-15	apical plate	WHL22.361376	Sp-C12orf51L_2	probable E3 ubiquitin-protein ligase HECTD4 (LOC100890523), mRNA	SPU_021278	NA	NA	NA
2.4278e-19	0.492231	0.148	0.048	3.78227e-15	apical plate	WHL22.38697	Sp-Hypp_546	liprin-beta-1-like (LOC105439569), mRNA	SPU_008381	NA	NA	NA
2.50485e-19	0.454171	0.241	0.1	3.90231e-15	apical plate	WHL22.290510	Sp-Mitosin; Sp-Odadc1L	centromere protein F (LOC592172), mRNA	SPU_013508; SPU_013509	NA	Cenp-F N-terminal domain; Septation ring formation regulator, EzrA	Chromosome_CentromereBinding
2.87336e-19	0.390116	0.065	0.013	4.4764e-15	apical plate	WHL22.581765	Sp-Hypp_1362	uncharacterized LOC100890105 (LOC100890105), mRNA	SPU_001989	sulfotransferase activity; integral component of membrane	Sulfotransferase family	NA
3.26029e-19	0.423425	0.651	0.428	5.0792e-15	apical plate	WHL22.659635	SPU_024192	calcium-binding protein SPEC 1A (LOC585870), mRNA	SPU_024192	calcium ion binding	EF-hand domain pair; EF hand; EF-hand domain	Unclassified
3.3568e-19	0.317898	0.038	0.005	5.22956e-15	apical plate	WHL22.703312	Sp-Ppp6c	serine/threonine-protein phosphatase 6 catalytic subunit (LOC763822), transcript variant X1, mRNA	SPU_005261	hydrolase activity	Calcineurin-like phosphoesterase	Hydrolase
3.4544e-19	0.400914	0.098	0.025	5.38162e-15	apical plate	WHL22.738193	Sp-Taf1l_1; Sp-Taf1	transcription initiation factor TFIID subunit 1 (LOC581708), mRNA	SPU_012482; SPU_025624	protein binding	Protein of unknown function (DUF3591); Bromodomain; Zinc knuckle	Kinase_Atypical
3.47171e-19	0.363551	0.161	0.054	5.40858e-15	apical plate	WHL22.355574	Sp-Cc2d2a-2	coiled-coil and C2 domain-containing protein 2A (LOC575583), mRNA	SPU_010514	NA	Family of unknown function (DUF5523)	NA
3.57881e-19	0.334164	0.073	0.015	5.57543e-15	apical plate	WHL22.423190	Sp-Ttl5	tubulin polyglutamylase TTLL5 (LOC582217), mRNA	SPU_001030	cellular protein modification process	Tubulin-tyrosine ligase family; YheC/D like ATP-grasp	Ligase
5.14648e-19	0.49347	0.402	0.209	8.0177e-15	apical plate	WHL22.329281	Sp-Hypp_1490; Sp-Hypp_170	claspin homolog (LOC575148), mRNA	SPU_003960; SPU_021196	NA	NA	NA
5.19369e-19	0.392709	0.065	0.013	8.09125e-15	apical plate	WHL22.389562	SPU_005996; SPU_013873	formin-J (LOC588660), mRNA	SPU_005996; SPU_013873	binding	Formin Homology 2 Domain	NA
5.5978e-19	0.514469	0.236	0.099	8.72082e-15	apical plate	WHL22.262216	Sp-Phf8; SPU_025924	histone lysine demethylase PHF8 (LOC584837), mRNA	SPU_016588; SPU_025924	protein binding; zinc ion binding	Jumonji helical domain; Cupin-like domain; JmjC domain, hydroxylase	NA
7.98476e-19	0.362873	0.06	0.011	1.24395e-14	apical plate	WHL22.13294	Sp-Sos	son of sevenless homolog 2 (LOC576982), mRNA	SPU_020070	small GTPase mediated signal transduction; regulation of Rho protein signal transduction; regulation of small GTPase mediated signal transduction; DNA binding; guanyl-nucleotide exchange factor activity; Rho guanyl-nucleotide exchange factor activity; protein heterodimerization activity; intracellular	RasGEF N-terminal motif; RasGEF domain; RhoGEF domain	GTPase_RhoRegulator_RhoGEFDH
7.99548e-19	0.509849	0.239	0.1	1.24562e-14	apical plate	WHL22.608229	Sp-Dnajb1	dnaJ homolog subfamily B member 1-like (LOC574994), mRNA	SPU_002148	protein folding; unfolded protein binding	DnaJ C terminal domain; DnaJ domain	Chaperone
8.30321e-19	0.51567	0.598	0.423	1.29356e-14	apical plate	WHL22.378640	Sp-Hnrpul1; Sp-Hnrpul1_1	heterogeneous nuclear ribonucleoprotein U-like protein 1 (LOC578672), transcript variant X1, mRNA	SPU_022264; SPU_022265	nucleic acid binding; protein binding	SPRY domain; SAP domain	NA
8.361e-19	0.332142	0.211	0.082	1.30256e-14	apical plate	WHL22.440773	SPU_005531; Sp-Capk	cAMP-dependent protein kinase type I-alpha regulatory subunit (LOC588563), transcript variant X3, mRNA	SPU_005531; SPU_022038	NA	Regulatory subunit of type II PKA R-subunit	NA
1.15417e-18	0.386805	0.073	0.015	1.79808e-14	apical plate	WHL22.577814	WHL22.577814	protein SpAN (LOC752794), mRNA	NA	NA	NA	NA
1.16794e-18	0.40751	0.138	0.044	1.81953e-14	apical plate	WHL22.567543	Sp-Inpp5a	type I inositol 1,4,5-trisphosphate 5-phosphatase (LOC100889154), transcript variant X1, mRNA	SPU_012698	phosphatidylinositol dephosphorylation	NA	Metabolism_Lipid
1.22083e-18	0.422659	0.118	0.035	1.90194e-14	apical plate	WHL22.552147	Sp-Hypp_3097	nuclear pore complex protein DDB_G0274915 homolog (LOC763219), transcript variant X1, mRNA	SPU_003893	NA	NA	NA
1.27483e-18	0.302714	0.05	0.008	1.98606e-14	apical plate	WHL22.191069	Sp-C7orf58L	cadherin-like and PC-esterase domain-containing protein 1 (LOC593589), transcript variant X4, mRNA	SPU_003412	cellular protein modification process	Tubulin-tyrosine ligase family	Ligase
1.93999e-18	0.505065	0.078	0.018	3.02231e-14	apical plate	WHL22.573757	Sp-Sat2_5	diamine acetyltransferase 2 (LOC593507), mRNA	SPU_021652	N-acetyltransferase activity	Acetyltransferase (GNAT) family; Acetyltransferase (GNAT) domain; Acetyltransferase (GNAT) domain	Transferase
1.98829e-18	0.359314	0.337	0.161	3.09755e-14	apical plate	WHL22.323928	Sp-Unk_44	uncharacterized LOC577184 (LOC577184), transcript variant X2, mRNA	SPU_023443	cell-matrix adhesion; extracellular matrix structural constituent; calcium ion binding; protein binding; proteinaceous extracellular matrix; membrane	Calcium-binding EGF domain; Complement Clr-like EGF-like; EGF domain	NA
2.28809e-18	0.271227	0.063	0.012	3.56462e-14	apical plate	WHL22.255419	WHL22.255419	NA	NA	NA	NA	NA
2.88526e-18	0.39298	0.035	0.004	4.49494e-14	apical plate	WHL22.549144	WHL22.549144	uncharacterized LOC100888660 (LOC100888660), mRNA	NA	NA	NA	NA
3.82003e-18	0.294227	0.093	0.024	5.95122e-14	apical plate	WHL22.689378	SPU_025617	uncharacterized protein C17orf105 homolog (LOC100888433), mRNA	SPU_025617	NA	KIAA1430 homologue	NA
3.91557e-18	0.629009	0.219	0.091	6.10007e-14	apical plate	WHL22.547132	Sp-C3orf20L	uncharacterized LOC100891346 (LOC100891346), mRNA	SPU_019923	NA	FAM194 protein; Mitochondrial 28S ribosomal protein S32	Translation_RibosomalProtein
5.60461e-18	0.38917	0.106	0.029	8.73143e-14	apical plate	WHL22.475865	Sp-Ivnslabp	influenza virus NS1A-binding protein homolog (LOC574807), mRNA	SPU_019731	protein binding	Kelch motif; Kelch motif; Galactose oxidase, central domain	Unclassified
5.73433e-18	0.31951	0.08	0.019	8.93351e-14	apical plate	WHL22.669721	Sp-Slc16a6_4	monocarboxylate transporter 7 (LOC753268), transcript variant X1, mRNA	SPU_021775	transmembrane transport; integral component of membrane	Major Facilitator Superfamily; PUCC protein	Metabolism_Carbohydrate
7.26861e-18	0.445774	0.058	0.011	1.13238e-13	apical plate	WHL22.597753	Sp-Hypp_1236	sarcoplasmic reticulum histidine-rich calcium-binding protein (LOC752241), mRNA	SPU_028727	NA	NA	NA
7.76669e-18	0.341759	0.123	0.037	1.20997e-13	apical plate	WHL22.275006	Sp-Atad5	ATPase family AAA domain-containing protein 5 (LOC100892842), mRNA	SPU_002054	nucleotide binding; ATP binding; nucleoside-triphosphatase activity	ATPase family associated with various cellular activities (AAA)	ATPase
8.18629e-18	0.374076	0.118	0.035	1.27534e-13	apical plate	WHL22.530344	Sp-Rld2L2	E3 ubiquitin-protein ligase HERC2 (LOC593245), partial mRNA	SPU_007497	heme binding	Regulator of chromosome condensation (RCC1) repeat; Regulator of chromosome condensation (RCC1) repeat; Cytochrome b5-like Heme/Steroid binding domain	NA
8.66886e-18	0.365937	0.123	0.038	1.35052e-13	apical plate	WHL22.169583	Sp-Camk2a; SPU_013275	calcium/calmodulin-dependent protein kinase type II alpha chain-like (LOC105437783), partial mRNA	SPU_004156; SPU_013275	protein phosphorylation; protein kinase activity; protein serine/threonine kinase activity; ATP binding; transferase activity; transferring phosphorus-containing groups	Protein kinase domain; Protein tyrosine kinase	CalciumToolkit
8.85241e-18	0.290228	0.058	0.011	1.37912e-13	apical plate	WHL22.566820	Sp-Abcc4c; Sp-Abcc4e; Sp-Abcc4a	multidrug resistance-associated protein 4 (LOC591982), transcript variant X3, mRNA	SPU_002411; SPU_014214; SPU_020669	transport; transmembrane transport; nucleotide binding; ATP binding; ATPase activity; nucleoside-triphosphatase activity; ATPase activity; coupled to transmembrane movement ofsubstances; integral component of membrane	ABC transporter; ABC transporter transmembrane region; 50S ribosome-binding GTPase	Defensome_ABCTransporter
1.20277e-17	0.268466	0.073	0.016	1.8738e-13	apical plate	WHL22.751707	Sp-Cnga3	cyclic nucleotide-gated channel rod photoreceptor subunit alpha-like (LOC105447617), mRNA	SPU_001956	ion transport; transmembrane transport; ion channel activity; membrane	Ion transport protein; Cyclic nucleotide-binding domain; Ion channel	Channel_Cation
1.37084e-17	0.301678	0.048	0.008	2.13562e-13	apical plate	WHL22.702669	SPU_007539	methionine adenosyltransferase 2 subunit beta (LOC594552), transcript variant X2, mRNA	SPU_007539	extracellular polysaccharide biosynthetic process; dTDP-4-dehydrorhamnose reductase activity	RmlD substrate binding domain	Oxidoreductase
1.5755e-17	0.403276	0.181	0.068	2.45448e-13	apical plate	WHL22.224218	Sp-Yyi	transcriptional repressor protein YY1 (LOC585260), transcript variant X2, mRNA	SPU_010295	nucleic acid binding; metal ion binding	Zinc finger, C2H2 type; Zinc-finger double domain; C2H2-type zinc finger	ZincFinger
2.07227e-17	0.268186	0.058	0.011	3.22839e-13	apical plate	WHL22.32023	SPU_007454	uncharacterized LOC100894142 (LOC100894142), mRNA	SPU_007454	NA	NA	NA
2.10368e-17	0.301367	0.103	0.029	3.27733e-13	apical plate	WHL22.250457	SPU_003588; Sp-Pc	pyruvate carboxylase, mitochondrial (LOC574782), mRNA	SPU_003588; SPU_006414	metabolic process; catalytic activity; biotin carboxylase activity; ATP binding; ligase activity; metal ion binding	Biotin carboxylase, N-terminal domain; Carbamoyl-phosphate synthase L chain, ATP binding domain	NA
2.26518e-17	0.31678	0.116	0.034	3.52893e-13	apical plate	WHL22.720393	SPU_006995	keratin-associated protein 5-2 (LOC757040), transcript variant X1, mRNA	SPU_006995	NA	NA	NA
2.38006e-17	0.391377	0.058	0.011	3.70789e-13	apical plate	WHL22.43754	Sp-Ppp1r3bL	glycogen-binding subunit 76A-like (LOC757161), mRNA	SPU_006256	protein binding	Carbohydrate/starch-binding module (family 21); Starch/carbohydrate-binding module (family 53)	Phosphatase_Other
3.54119e-17	0.481506	0.553	0.349	5.51682e-13	apical plate	WHL22.727579	Sp-CycD	cyclin D (LOC373245), mRNA	SPU_007013	regulation of cyclin-dependent protein serine/threoninekinase activity; regulation of cell cycle; protein kinase binding; nucleus	Cyclin, N-terminal domain; Cyclin, C-terminal domain	CellCycle
3.58616e-17	0.406012	0.656	0.486	5.58688e-13	apical plate	WHL22.28747	SPU_009484	uncharacterized LOC100892995 (LOC100892995), mRNA	SPU_009484	NA	Domain of unknown function (DUF4541); FAM183A and FAM183B related	NA
3.90657e-17	0.325568	0.098	0.027	6.08605e-13	apical plate	WHL22.473729	Sp-Rbbp6L; Sp-Hypp_220	E3 ubiquitin-protein ligase RBBP6 (LOC584197), mRNA	SPU_006215; SPU_024771	zinc ion binding; nucleus	DWNN domain	Unclassified
3.94182e-17	0.442371	0.143	0.048	6.14097e-13	apical plate	WHL22.506111	Sp-Eggbr1L_1; Sp-Klkb1; Sp-Hypp_1191	hyalin (LOC586971), partial mRNA	SPU_003635; SPU_012390; SPU_026917	protein binding	HYR domain; CUB domain; von Willebrand factor type D domain	BloodProtein
4.016e-17	0.30128	0.078	0.018	6.25652e-13	apical plate	WHL22.237984	Sp-Mysm1L	uncharacterized LOC577537 (LOC577537), transcript variant X1, mRNA	SPU_011661	DNA binding; chromatin binding; protein binding	SWIRM domain; Myb-like DNA-binding domain	NA
5.00051e-17	0.294276	0.085	0.022	7.7903e-13	apical plate	WHL22.346195	WHL22.346195	protein phosphatase 1 regulatory subunit 12A-like (LOC580387), mRNA	NA	NA	NA	NA
5.09868e-17	0.252162	0.905	0.749	7.94323e-13	apical plate	WHL22.350152	Sp-Ars_2	arylsulfatase (LOC582391), mRNA	SPU_006968	metabolic process; catalytic activity; sulfuric ester hydrolase activity	Sulfatase; C-terminal region of aryl-sulfatase	Hydrolase
5.21993e-17	0.2638	0.028	0.003	8.13213e-13	apical plate	WHL22.162209	Sp-AnL5	blastula protease 10-like (LOC105438784), mRNA	SPU_010948	proteolysis; metalloendopeptidase activity; metallopeptidase activity; zinc ion binding	Astacin (Peptidase family M12A); CUB domain	Metalloprotease
5.33247e-17	0.341684	0.093	0.025	8.30746e-13	apical plate	WHL22.547286	Sp-Pten	phosphatidylinositol 3,4,5-trisphosphate 3-phosphatase and dual-specificity protein phosphatase PTEN (LOC590938), mRNA	SPU_009522	protein dephosphorylation; dephosphorylation; protein tyrosine phosphatase activity; protein binding; protein tyrosine/serine/threonine phosphatase activity; phosphatase activity	C2 domain of PTEN tumour-suppressor protein; Dual specificity phosphatase, catalytic domain	Phosphatase_Tyrosine
7.24211e-17	0.296818	0.128	0.041	1.12825e-12	apical plate	WHL22.242427	Sp-GliA	transcriptional activator GLI3 (LOC580371), mRNA	SPU_017627	nucleic acid binding; metal ion binding	Zinc finger, C2H2 type; Zinc-finger double domain; C2H2-type zinc finger	Nervous_Retinal
8.12681e-17	0.334563	0.05	0.009	1.26608e-12	apical plate	WHL22.44848	WHL22.44848	BMP-binding endothelial regulator protein (LOC583098), mRNA	NA	NA	NA	NA
8.82471e-17	0.415971	0.201	0.081	1.3748e-12	apical plate	WHL22.618622	SPU_004699; Sp-Syt1-1	synaptotagmin I (LOC373478), mRNA	SPU_004699; SPU_005854	NA	Transmembrane 52	NA
1.08537e-16	0.397089	0.239	0.104	1.69089e-12	apical plate	WHL22.41223	Sp-Pim-2	serine/threonine-protein kinase pim-1-like (LOC753187), mRNA	SPU_014293	protein phosphorylation; protein kinase activity; ATP binding; transferase activity; transferring phosphorus-containing groups	Protein kinase domain; Protein tyrosine kinase; Kinase-like	Kinase_CAMK
1.12238e-16	0.34156	0.101	0.028	1.74856e-12	apical plate	WHL22.423754	SPU_023938; Sp-Inoc1	DNA helicase INO80 (LOC590972), mRNA	SPU_023938; SPU_025940	NA	NA	NA
1.1953e-16	0.371817	0.128	0.041	1.86216e-12	apical plate	WHL22.676756	Sp-Pola; SPU_022558; Sp-Pola1	DNA polymerase alpha catalytic subunit (LOC584095), mRNA	SPU_000210; SPU_022558; SPU_023010	nucleobase-containing compound metabolic process; DNA replication; nucleotide binding; nucleoside binding; nucleic acid binding; DNA binding; DNA-directed DNA polymerase activity	DNA polymerase family B; DNA Polymerase alpha zinc finger; DNA polymerase family B, exonuclease domain	DNA_Replication
1.2013e-16	0.520818	0.246	0.114	1.8715e-12	apical plate	WHL22.494583	SPU_012881; Sp-Yap1	transcriptional coactivator YAP1 (LOC584590), transcript variant X2, mRNA	SPU_012881; SPU_027559	protein binding	FAM181	NA
1.25752e-16	0.481653	0.219	0.093	1.9591e-12	apical plate	WHL22.55237	Sp-Arid4b; Sp-Arid4b_1	AT-rich interactive domain-containing protein 4A (LOC589247), mRNA	SPU_009801; SPU_021181	DNA binding; intracellular	RBB1NT (NUC162) domain; ARID/BRIGHT DNA binding domain	NucleicAcid_Binding
1.33685e-16	0.250327	0.05	0.009	2.08267e-12	apical plate	WHL22.75266	Sp-Abcb9B	ATP-binding cassette sub-family B member 9 (LOC575393), mRNA	SPU_002238	transport; transmembrane transport; ATP binding; ATPase activity; ATPase activity; coupled to transmembrane movement ofsubstances; integral component of membrane	ABC transporter transmembrane region; ABC transporter	Defensome_ABCTransporter
1.4766e-16	0.494556	0.123	0.04	2.30039e-12	apical plate	WHL22.271605	Sp-Otud5	OTU domain-containing protein 5 (LOC582506), transcript variant X1, mRNA	SPU_009013	NA	OTU-like cysteine protease	Unclassified
1.5351e-16	0.493982	0.538	0.359	2.39154e-12	apical plate	WHL22.368559	SPU_018575; Sp-Gatad1; SPU_018577; Sp-Traf3ip1	GATA zinc finger domain-containing protein 1-like (LOC591657), mRNA	SPU_018575; SPU_018576; SPU_018577; SPU_019927	microtubule binding	Microtubule-binding protein MIP-T3 C-terminal region	NA
1.55397e-16	0.343939	0.09	0.024	2.42093e-12	apical plate	WHL22.475967	SPU_005446; SPU_006352	NA	SPU_005446; SPU_006352	NA	NA	NA
2.30077e-16	0.432638	0.111	0.034	3.58437e-12	apical plate	WHL22.712847	WHL22.712847	uncharacterized LOC100888599 (LOC100888599), ncRNA	NA	NA	NA	NA
2.68281e-16	0.51391	0.221	0.096	4.17956e-12	apical plate	WHL22.6078	Sp-Hypp_1543; SPU_024470	leucine-rich repeat-containing protein 71 (LOC585585), transcript variant X14, mRNA	SPU_004774; SPU_024470	NA	Leucine Rich repeat	NA
3.18871e-16	0.586852	0.369	0.213	4.9677e-12	apical plate	WHL22.18009	Sp-Bat2	protein PRRC2A (LOC591477), transcript variant X1, mRNA	SPU_014419	NA	BAT2 N-terminus	Unclassified
3.82018e-16	0.375442	0.163	0.061	5.95147e-12	apical plate	WHL22.113374	SPU_004705	upstream activation factor subunit spp27 (LOC764515), mRNA	SPU_004705	DNA binding; protein binding	SWIB/MDM2 domain; DEK C terminal domain	Unclassified
5.58461e-16	0.379729	0.045	0.008	8.70026e-12	apical plate	WHL22.699714	SPU_024423; Sp-Sntb1	beta-1-syntrophin-like (LOC105436396), mRNA	SPU_024423; SPU_026776	NA	NA	NA
5.98138e-16	0.444565	0.239	0.108	9.31838e-12	apical plate	WHL22.95075	Sp-RalBP1	ralA-binding protein 1 (LOC580072), transcript variant X2, mRNA	SPU_002118	signal transduction; intracellular	RhoGAP domain	GTPase_RhoRegulator_RhoGAP
6.36362e-16	0.287209	0.083	0.021	9.91389e-12	apical plate	WHL22.95662	Sp-Fdft1	squalene synthase (LOC586013), mRNA	SPU_008075	NA	Squalene/phytoene synthase	Metabolism_Lipid
7.8475e-16	0.354043	0.098	0.028	1.22256e-11	apical plate	WHL22.72706	Sp-Rfp150L	RING finger protein 150 (LOC580394), mRNA	SPU_001450	protein binding; zinc ion binding	Ring finger domain; Zinc finger, C3HC4 type (RING finger); Zinc finger, C3HC4 type (RING finger)	NA
8.50929e-16	0.413249	0.151	0.055	1.32566e-11	apical plate	WHL22.559743	Sp-Als2cr4L	transmembrane protein 237 (LOC752951), mRNA	SPU_023873	NA	Transmembrane protein 237	NA
9.77852e-16	0.402301	0.178	0.071	1.5234e-11	apical plate	WHL22.1424	SPU_005112; Sp-Ppp1rs12B; Sp-Hypp_1016	protein phosphatase 1 regulatory subunit 12B (LOC591869), mRNA	SPU_005112; SPU_005663; SPU_021212	protein binding	Ankyrin repeats (many copies); Ankyrin repeats (3 copies); Ankyrin repeats (many copies)	Unclassified
1.09316e-15	0.442518	0.42	0.239	1.70303e-11	apical plate	WHL22.200035	Sp-LrpL_4	low-density lipoprotein receptor (LOC594262), partial mRNA	SPU_007072	calcium ion binding; protein binding	Low-density lipoprotein receptor domain class A; Low-density lipoprotein receptor repeat class B; Coagulation Factor Xa inhibitory site	NA
1.32536e-15	0.324799	0.095	0.027	2.06478e-11	apical plate	WHL22.380370	Sp-Zbed1-3; Sp-Hypp_2019	uncharacterized LOC105440616 (LOC105440616), mRNA	SPU_012134; SPU_012135	nucleic acid binding; DNA binding; protein dimerization activity	hAT family C-terminal dimerisation region	NA
1.40626e-15	0.465105	0.241	0.112	2.19081e-11	apical plate	WHL22.499079	WHL22.499079	WASH complex subunit FAM21 homolog (LOC100890385), transcript variant X2, mRNA	NA	NA	NA	NA
1.727e-15	0.393414	0.063	0.014	2.69049e-11	apical plate	WHL22.547786	Sp-Slc16a9	monocarboxylate transporter 10 (LOC593504), transcript variant X1, mRNA	SPU_001211	transmembrane transport; integral component of membrane	Major Facilitator Superfamily	Metabolism_Carbohydrate
1.94046e-15	0.325535	0.106	0.032	3.02305e-11	apical plate	WHL22.98540	Sp-Bcdin3	probable RNA methyltransferase Y17G7B.18 (LOC584993), mRNA	SPU_020929	methyltransferase activity	Bicoid-interacting protein 3 (Bin3); Methyltransferase domain; Methyltransferase domain	NA
1.96283e-15	0.31796	0.073	0.018	3.05789e-11	apical plate	WHL22.760326	SPU_016922; SPU_019163; Sp-Tep1-2	telomerase protein component 1 (LOC584519), mRNA	SPU_016922; SPU_019163; SPU_019164	RNA binding; ribonucleoprotein complex	TROVE domain	NucleicAcid_Binding
2.13461e-15	0.465159	0.224	0.1	3.32551e-11	apical plate	WHL22.597887	Sp-Mpp5-2; Sp-Mpp5-3	MAGUK p55 subfamily member 5 (LOC579187), transcript variant X2, mRNA	SPU_004864; SPU_016842	protein binding	Guanylate kinase; PDZ domain; Variant SH3 domain	NA
2.17048e-15	0.321797	0.085	0.023	3.3814e-11	apical plate	WHL22.304988	Sp-Flam2(N-terminus)	cadherin EGF LAG seven-pass G-type receptor 2 (LOC580874), mRNA	SPU_019261	cell adhesion; homophilic cell adhesion; calcium ion binding; protein binding; plasma membrane; membrane	Cadherin domain; Cadherin-like; Cadherin-like	Adhesion_Cadherin
2.33746e-15	0.276316	0.025	0.003	3.64153e-11	apical plate	WHL22.65765	Sp-Ofd1L	oral-facial-digital syndrome 1 protein (LOC578491), mRNA	SPU_002878	protein binding	LisH	NA
2.33906e-15	0.3611	0.048	0.009	3.64402e-11	apical plate	WHL22.539303	Sp-Adam/Ts6/10L1; Sp-Unk_24; Sp-Adamts6L	A disintegrin and metalloproteinase with thrombospondin motifs 6 (LOC594564), mRNA	SPU_000680; SPU_016194; SPU_030018	proteolysis; metalloendopeptidase activity; peptidase activity; metallopeptidase activity; zinc ion binding; proteinaceous extracellular matrix; extracellular matrix	ADAM-TS Spacer 1; Reprolysin (M12B) family zinc metalloprotease; ADAM cysteine-rich domain	Metalloprotease
2.36715e-15	0.455684	0.231	0.105	3.68778e-11	apical plate	WHL22.747798	Sp-Rrm; Sp-P53L; SPU_009855; Sp-Pink1L	msx2-interacting protein (LOC579027), transcript variant X1, mRNA	SPU_000239; SPU_008979; SPU_009855; SPU_013990	nucleotide binding; nucleic acid binding	RNA recognition motif. (a.k.a. RRM, RBD, or RNP domain)	Unclassified
2.47639e-15	0.414196	0.103	0.031	3.85796e-11	apical plate	WHL22.564818	Sp-Drakr1; Sp-Hypp_829; Sp-Drak	serine/threonine-protein kinase 17A (LOC582485), mRNA	SPU_016533; SPU_016534; SPU_028649	protein phosphorylation; protein kinase activity; ATP binding; transferase activity; transferring phosphorus-containing groups	Protein kinase domain; Protein tyrosine kinase	Apoptosis_RegulatoryFactor
2.92266e-15	0.455836	0.289	0.146	4.55321e-11	apical plate	WHL22.60330	Sp-SmtnL_2	smoothelin-like protein 1 (LOC590168), mRNA	SPU_021845	protein binding	Calponin homology (CH) domain	NA
2.98174e-15	0.285648	0.088	0.024	4.64525e-11	apical plate	WHL22.300176	Sp-Hypp_1867	cilia- and flagella-associated protein 97 (LOC592251), mRNA	SPU_009710	NA	KIAA1430 homologue	NA
3.50561e-15	0.312949	0.083	0.022	5.46138e-11	apical plate	WHL22.198436	SPU_019594; Sp-Kiaa1095; Sp-Pdzrn4	E3 ubiquitin-protein ligase PDZRN3 (LOC575474), mRNA	SPU_019594; SPU_023860; SPU_027528	protein binding	NA	NA
3.56224e-15	0.467718	0.093	0.027	5.54962e-11	apical plate	WHL22.5055	Sp-Dnah7; Sp-Unk_95; Sp-Unk_96; Sp-Axndhc12h	dynein heavy chain 12, axonemal-like (LOC576226), mRNA	SPU_003564; SPU_005317; SPU_020747; SPU_030232	microtubule-based movement; microtubule motor activity; dynein complex	Hydrolytic ATP binding site of dynein motor region; Dynein heavy chain C-terminal domain; P-loop containing dynein motor region D4	NA
4.03843e-15	0.385908	0.226	0.101	6.29146e-11	apical plate	WHL22.666194	Sp-Smarcd1L	SWI/SNF-related matrix-associated actin-dependent regulator of chromatin subfamily D member 1-like (LOC105446621), mRNA	SPU_003233	protein binding	SWIB/MDM2 domain; SH3 domain; Variant SH3 domain	Unclassified
4.43217e-15	0.424942	0.332	0.173	6.90487e-11	apical plate	WHL22.667991	Sp-Adam10	disintegrin and metalloproteinase domain-containing protein 10 (LOC581388), mRNA	SPU_028173	proteolysis; metalloendopeptidase activity; metallopeptidase activity; zinc ion binding	Metallo-peptidase family M12B Reprolysin-like; Reprolysin family propeptide	Metallopeptidase
4.51959e-15	0.438661	0.09	0.026	7.04106e-11	apical plate	WHL22.697029	Sp-Hypp_101; Sp-Pcnt; Sp-Hypp_124	A-kinase anchor protein 9 (LOC582174), transcript variant X5, mRNA	SPU_014426; SPU_015653; SPU_016132	NA	NA	NA
5.8597e-15	0.365995	0.113	0.037	9.12883e-11	apical plate	WHL22.610697	Sp-Dyx1c1	dyslexia susceptibility 1 candidate gene 1 protein homolog (LOC582679), mRNA	SPU_024081	protein binding	Tetratricopeptide repeat; Tetratricopeptide repeat; TPR repeat	Unclassified
5.89619e-15	0.491993	0.246	0.116	9.18567e-11	apical plate	WHL22.522987	SPU_002298	transcription factor Sp5-like (LOC576715), mRNA	SPU_002298	NA	NA	NA
6.25762e-15	0.345741	0.141	0.051	9.74875e-11	apical plate	WHL22.735260	Sp-Tbc1d22b	TBC1 domain family member 22B (LOC593010), transcript variant X1, mRNA	SPU_022257	regulation of Rab GTPase activity; Rab GTPase activator activity	Rab-GTPase-TBC domain	NA
6.26512e-15	0.309709	0.088	0.025	9.76043e-11	apical plate	WHL22.649616	Sp-Ndc80L	uncharacterized LOC105447489 (LOC105447489), mRNA	SPU_021411	NA	HEC/Ndc80p family; Domain of unknown function (DUF5595)	Cytoskeleton_KinetochoreAssociated
7.05552e-15	0.434423	0.106	0.033	1.09918e-10	apical plate	WHL22.548599	SPU_016342; Sp-E12	transcription factor 12 (LOC581618), transcript variant X5, mRNA	SPU_016342; SPU_016343	NA	NA	NA
7.29799e-15	0.293037	0.053	0.011	1.13695e-10	apical plate	WHL22.688376	Sp-Lh2/Fn3; Sp-Fn3_7	uncharacterized LOC105436754 (LOC105436754), mRNA	SPU_009018; SPU_021262	protein binding	Fibronectin type III domain; PLAT/LH2 domain; Purple acid Phosphatase, N-terminal domain	Adhesion_IgFN3Receptor
7.43466e-15	0.323748	0.075	0.019	1.15825e-10	apical plate	WHL22.299224	Sp-Ttll3; SPU_019571	tubulin monoglycylase TTLL3 (LOC578867), transcript variant X3, mRNA	SPU_019570; SPU_019571	cellular protein modification process	Tubulin-tyrosine ligase family	Ligase
7.85796e-15	0.353458	0.085	0.024	1.22419e-10	apical plate	WHL22.29375	Sp-Axin	axin-1 (LOC576611), transcript variant X2, mRNA	SPU_001072	NA	DIX domain; Regulator of G protein signaling domain; Axin beta-catenin binding domain	NA
8.43859e-15	0.410853	0.103	0.032	1.31465e-10	apical plate	WHL22.297412	Sp-Bptf	nucleosome-remodeling factor subunit BPTF (LOC575060), mRNA	SPU_025832	protein binding; zinc ion binding	PHD-finger; Bromodomain; DDT domain	NA
8.91843e-15	0.256341	0.043	0.007	1.3894e-10	apical plate	WHL22.78839	Sp-Hectd2	probable E3 ubiquitin-protein ligase HECTD2 (LOC577684), mRNA	SPU_006582	ubiquitin-protein ligase activity	HECT-domain (ubiquitin-transferase)	Unclassified
9.60724e-15	0.438903	0.093	0.027	1.49671e-10	apical plate	WHL22.139911	Sp-Hypp_194; SPU_025308; Sp-Myst3L	histone acetyltransferase KAT6A (LOC580929), transcript variant X6, mRNA	SPU_023102; SPU_025308; SPU_026602	regulation of transcription; DNA-templated; transferase activity; transferring acyl groups other thanamino-acyl groups; nucleus	MOZ/SAS family; MYST family zinc finger domain	Histone_Acetyltransferase
1.02514e-14	0.463757	0.158	0.062	1.59707e-10	apical plate	WHL22.308994	Sp-Ap1gbp1L	synergin gamma (LOC588932), transcript variant X1, mRNA	SPU_019119	calcium ion binding; protein binding	NA	NA
1.05723e-14	0.353654	0.053	0.011	1.64706e-10	apical plate	WHL22.580647	Sp-Hypp_3113; SPU_018412	uncharacterized LOC763063 (LOC763063), mRNA	SPU_001395; SPU_018412	NA	NA	NA
1.09869e-14	0.416232	0.103	0.032	1.71165e-10	apical plate	WHL22.366432	Sp-Wrnip1L	ATPase WRNIP1-like (LOC591120), mRNA	SPU_003630	DNA replication; DNA repair; nucleotide binding; DNA binding; ATP binding; nucleoside-triphosphatase activity	MgsA AAA+ ATPase C terminal; AAA C-terminal domain; ATPase family associated with various cellular activities (AAA)	ATPase
1.12583e-14	0.260436	0.073	0.018	1.75393e-10	apical plate	WHL22.362444	SPU_007734	NA	SPU_007734	inositol trisphosphate metabolic process; magnesium ion binding; ATP binding; inositol tetrakisphosphate 1-kinase activity; inositol-1;3;4-trisphosphate 6-kinase activity; inositol-1;3;4-trisphosphate 5-kinase activity; intracellular	Inositol 1,3,4-trisphosphate 5/6-kinase pre-ATP-grasp domain	NA
1.50534e-14	0.293542	0.098	0.03	2.34517e-10	apical plate	WHL22.50579	SPU_001480	MFS-type transporter SLC18B1 (LOC100891329), mRNA	SPU_001480	transmembrane transport; transporter activity; plasma membrane; integral component of membrane	Major Facilitator Superfamily	Unclassified
1.64793e-14	0.405918	0.095	0.029	2.56731e-10	apical plate	WHL22.518304	Sp-TlrP16	solute carrier organic anion transporter family member 4A1 (LOC581658), mRNA	SPU_015789	transport; transporter activity; protein binding; membrane	Organic Anion Transporter Polypeptide (OATP) family; Major Facilitator Superfamily; Leucine rich repeat	Metabolism_SecondaryMetabolites
1.88191e-14	0.360899	0.302	0.153	2.93182e-10	apical plate	WHL22.131608	Sp-Hypp_1772	myb-like protein X (LOC577952), mRNA	SPU_008203	regulation of microtubule polymerization or depolymerization	Stathmin family	NA
2.09561e-14	0.303098	0.06	0.014	3.26475e-10	apical plate	WHL22.457903	Sp-Hypp_2777	coiled-coil domain-containing protein 177 (LOC753868), transcript variant X1, mRNA	SPU_025183	NA	Domain of unknown function (DUF4659)	NA
2.40262e-14	0.254483	0.075	0.02	3.74304e-10	apical plate	WHL22.735405	Sp-Hypp_840	telomeric repeat-binding factor 2-interacting protein 1 (LOC763087), transcript variant X1, mRNA	SPU_016714	DNA binding	Rap1 Myb domain	Unclassified
2.85605e-14	0.321859	0.058	0.013	4.44945e-10	apical plate	WHL22.128771	Sp-Phip_1	PH-interacting protein (LOC764715), mRNA	SPU_019256	protein binding	Bromodomain	Unclassified
2.8948e-14	0.375338	0.171	0.07	4.50981e-10	apical plate	WHL22.351039	Sp-Isot	ubiquitin carboxyl-terminal hydrolase 5 (LOC592342), mRNA	SPU_002360	ubiquitin-dependent protein catabolic process; protein binding; omega peptidase activity; zinc ion binding; ubiquitinyl hydrolase activity	Ubiquitin carboxyl-terminal hydrolase; Variant UBP zinc finger; UBA/TS-N domain	NA
2.96109e-14	0.385732	0.111	0.036	4.61308e-10	apical plate	WHL22.235671	SPU_002529	uncharacterized LOC577789 (LOC577789), transcript variant X1, mRNA	SPU_002529	NA	SERTA motif	Unclassified
3.01727e-14	0.42118	0.244	0.115	4.7006e-10	apical plate	WHL22.765203	Sp-Slc44a2	choline transporter-like protein 2 (LOC593044), mRNA	SPU_003329	binding	Plasma-membrane choline transporter	Metabolism_Lipid
3.418e-14	0.252737	0.108	0.035	5.3249e-10	apical plate	WHL22.147447	Sp-Z63	zinc finger protein 541 (LOC100889942), transcript variant X2, mRNA	SPU_018850	nucleic acid binding; DNA binding; chromatin binding; metal ion binding	C2H2-type zinc finger; C2H2-type zinc finger; Zinc finger, C2H2 type	ZincFinger
4.58926e-14	0.400538	0.151	0.059	7.14961e-10	apical plate	WHL22.7559	Sp-Hsp40B	dnaJ homolog subfamily B member 1-like (LOC752244), mRNA	SPU_022236	protein folding; unfolded protein binding	DnaJ domain; DnaJ C terminal domain	Defensome_HSP
4.76816e-14	0.386892	0.148	0.056	7.42832e-10	apical plate	WHL22.225202	SPU_006220	fibropellin-3 (LOC582441), mRNA	SPU_006220	calcium ion binding; protein binding	EGF-like domain; Human growth factor-like EGF; EGF-like domain	Unclassified
4.82959e-14	0.388799	0.055	0.012	7.52403e-10	apical plate	WHL22.581212	Sp-Nek1	serine/threonine-protein kinase Nek1 (LOC577477), transcript variant X2, mRNA	SPU_019021	protein phosphorylation; protein kinase activity; protein serine/threonine kinase activity; ATP binding; transferase activity; transferring phosphorus-containing groups	Protein kinase domain; Protein tyrosine kinase; Kinase-like	CellCycle
5.19674e-14	0.254589	0.06	0.014	8.096e-10	apical plate	WHL22.602375	Sp-Igf_23; Sp-Ttn; Sp-Ttn2	muscle M-line assembly protein unc-89 (LOC756008), partial mRNA	SPU_008653; SPU_010006; SPU_023142	protein binding	Immunoglobulin I-set domain; Immunoglobulin domain; Immunoglobulin domain	Adhesion_Atypical
5.52828e-14	0.404067	0.09	0.027	8.61251e-10	apical plate	WHL22.553753	Sp-Dnase1_2	uncharacterized LOC100891970 (LOC100891970), transcript variant X9, mRNA	SPU_022588	DNA catabolic process; deoxyribonuclease activity; endodeoxyribonuclease activity; producing5'-phosphomonoesters	Endonuclease/Exonuclease/phosphatase family	Hydrolase
5.59729e-14	0.34057	0.063	0.015	8.72002e-10	apical plate	WHL22.210225	WHL22.210225	zinc finger protein OZF (LOC100891470), transcript variant X4, mRNA	NA	NA	NA	NA
6.27419e-14	0.483361	0.085	0.025	9.77456e-10	apical plate	WHL22.759837	Sp-Hypp_3069; Sp-Pragmin	pseudopodium-enriched atypical kinase 1 (LOC752284), transcript variant X2, mRNA	SPU_009006; SPU_019293	NA	NA	NA
6.57431e-14	0.271029	0.085	0.025	1.02421e-09	apical plate	WHL22.331083	Sp-Daxx	death domain-associated protein 6-like (LOC585922), mRNA	SPU_011531	NA	Daxx N-terminal Rassf1C-interacting domain	Unclassified
6.82366e-14	0.312047	0.146	0.056	1.06306e-09	apical plate	WHL22.435966	Sp-Mok1	MAPK/MAK/MRK overlapping kinase (LOC580960), mRNA	SPU_023957	protein phosphorylation; protein kinase activity; protein serine/threonine kinase activity; ATP binding; transferase activity; transferring phosphorus-containing groups	Protein kinase domain; Protein tyrosine kinase; Kinase-like	Kinase_CMGC
7.85749e-14	0.260794	0.103	0.033	1.22412e-09	apical plate	WHL22.461866	Sp-TrafB	TNF receptor-associated factor 4 (LOC574808), mRNA	SPU_023069	signal transduction; protein ubiquitination; regulation of apoptotic process; ubiquitin-protein ligase activity; protein binding; zinc ion binding	TRAF-type zinc finger; Zinc finger, C3HC4 type (RING finger)	ImmuneSystem_Signal
8.55067e-14	0.290601	0.103	0.033	1.33211e-09	apical plate	WHL22.326976	SPU_012935; SPU_019954	glycine-rich cell wall structural protein 1-like (LOC583904), mRNA	SPU_012935; SPU_019954	NA	NA	NA
9.17867e-14	0.28903	0.146	0.056	1.42994e-09	apical plate	WHL22.769929	Sp-Fn3_10	lymphocyte-specific helicase-like (LOC578693), mRNA	SPU_024777	protein binding	Fibronectin type III domain; Interferon-alpha/beta receptor, fibronectin type III; Purple acid Phosphatase, N-terminal domain	Adhesion_Atypical
1.45144e-13	0.447932	0.219	0.102	2.2612e-09	apical plate	WHL22.5521	Sp-Lrrfip2	leucine-rich repeat flightless-interacting protein 2 (LOC577253), transcript variant X6, mRNA	SPU_014742	NA	LRRFIP family	Homolog-of-gene-with-unknown-function
1.4701e-13	0.344162	0.116	0.04	2.29027e-09	apical plate	WHL22.125013	Sp-Prom1L; Sp-Prom1_1	prominin-1-A (LOC581976), mRNA	SPU_005134; SPU_022457	integral component of membrane	Prominin; Predicted membrane protein (DUF2207)	Unclassified
1.66283e-13	0.306802	0.068	0.017	2.59052e-09	apical plate	WHL22.753528	WHL22.753528	heparanase (LOC752792), mRNA	NA	NA	NA	NA
1.68817e-13	0.405184	0.296	0.154	2.63e-09	apical plate	WHL22.51238	Sp-Glyt_3	sodium- and chloride-dependent glycine transporter 1 (LOC577731), transcript variant X2, mRNA	SPU_009356	neurotransmitter transport; neurotransmitter:sodium symporter activity; integral component of membrane	Sodium:neurotransmitter symporter family	NA
1.70654e-13	0.332789	0.111	0.037	2.65862e-09	apical plate	WHL22.349601	WHL22.349601	uncharacterized LOC105437551 (LOC105437551), mRNA	NA	NA	NA	NA
2.54376e-13	0.324901	0.123	0.044	3.96292e-09	apical plate	WHL22.75659	Sp-Hypp_3000	uncharacterized LOC100892456 (LOC100892456), mRNA	SPU_019271	NA	NA	NA
2.70259e-13	0.308864	0.106	0.035	4.21037e-09	apical plate	WHL22.532838	Sp-Hypp_1704	nucleolin (LOC589044), mRNA	SPU_007198	DNA binding	NA	NA
2.71177e-13	0.372558	0.226	0.105	4.22467e-09	apical plate	WHL22.770360	Sp-Macf1; SPU_003259; Sp-Abp620h	microtubule-actin cross-linking factor 1 (LOC756550), transcript variant X4, mRNA	SPU_003258; SPU_003259; SPU_003260	protein binding	Spectrin repeat	NA
2.88814e-13	0.483726	0.158	0.066	4.49943e-09	apical plate	WHL22.173528	Sp-Phf3; Sp-Hypp_693	death-inducer obliterator 1 (LOC575208), transcript variant X2, mRNA	SPU_002559; SPU_012815	transcription; DNA-templated; protein binding; zinc ion binding; hydrolase activity; acting on acid anhydrides; nucleus	Transcription factor S-II (TFIIS), central domain; SPOC domain; BRK domain	NA
3.19735e-13	0.332854	0.058	0.014	4.98115e-09	apical plate	WHL22.657244	Sp-Trp53bp1	tumor suppressor p53-binding protein 1 (LOC593800), mRNA	SPU_000722	NA	BRCA1 C Terminus (BRCT) domain; Tumour suppressor p53-binding protein-1 Tudor; Domain of unknown function (DUF4537)	NA
3.57337e-13	0.266031	0.055	0.013	5.56696e-09	apical plate	WHL22.582106	WHL22.582106	uncharacterized LOC100887886 (LOC100887886), transcript variant X1, mRNA	NA	NA	NA	NA
3.63967e-13	0.289488	0.038	0.007	5.67024e-09	apical plate	WHL22.312215	Sp-Ankrd27L	ankyrin repeat domain-containing protein 27 (LOC590633), mRNA	SPU_020888	NA	Vacuolar sorting protein 9 (VPS9) domain	Transport_VacuolarProteinSorting
3.79931e-13	0.373219	0.078	0.022	5.91895e-09	apical plate	WHL22.557812	SPU_010084; SPU_020390	meteorin-like protein (LOC580881), mRNA	SPU_010084; SPU_020390	NA	NA	NA
3.9416e-13	0.255683	0.063	0.016	6.14061e-09	apical plate	WHL22.201159	Sp-Zrsr2	U2 small nuclear ribonucleoprotein auxiliary factor 35 kDa subunit-related protein 2 (LOC583099), transcript variant X1, mRNA	SPU_011779	nucleotide binding; nucleic acid binding; RNA binding; metal ion binding; nucleus	Zinc finger C-x8-C-x5-C-x3-H type (and similar); RNA recognition motif. (a.k.a. RRM, RBD, or RNP domain)	NA
4.05603e-13	0.270828	0.098	0.032	6.3189e-09	apical plate	WHL22.87190	Sp-Ccb2A	voltage-dependent L-type calcium channel subunit beta-1 (LOC585535), transcript variant X3, mRNA	SPU_001624	calcium ion transmembrane transport; voltage-gated calcium channel activity; protein binding; voltage-gated calcium channel complex	Guanylate kinase; Voltage gated calcium channel subunit beta domain 4Aa N terminal	CalciumToolkit
4.28194e-13	0.336759	0.123	0.045	6.67084e-09	apical plate	WHL22.16634	Sp-Hypp_3072; Sp-Pdcd11L; Sp-Pdcd11_1; Sp-Pdcd11_2	protein RRP5 homolog (LOC584784), mRNA	SPU_006977; SPU_006978; SPU_019254; SPU_024804	NA	BEN domain; Domain of unknown function (DUF4806)	Unclassified
4.34286e-13	0.359251	0.111	0.038	6.76573e-09	apical plate	WHL22.682490	Sp-C3orf16L	protein ANKUB1 (LOC587133), mRNA	SPU_016482	protein binding	Ubiquitin family; Ankyrin repeats (3 copies); Ankyrin repeats (many copies)	NA
4.47558e-13	0.314144	0.181	0.078	6.97251e-09	apical plate	WHL22.591475	Sp-Ndrk; SPU_021059	serine/threonine-protein kinase tricorner (LOC582923), transcript variant X2, mRNA	SPU_012503; SPU_021059	protein phosphorylation; protein kinase activity; protein serine/threonine kinase activity; ATP binding; transferase activity; transferring phosphorus-containing groups	Protein kinase domain; Protein tyrosine kinase; Haspin like kinase domain	Kinase_AGC
4.59713e-13	0.322939	0.131	0.049	7.16186e-09	apical plate	WHL22.385005	Sp-Tmem131; SPU_025493	transmembrane protein 131 (LOC590415), transcript variant X5, mRNA	SPU_012501; SPU_025493	NA	NA	NA
4.69013e-13	0.448154	0.357	0.209	7.30676e-09	apical plate	WHL22.477321	Sp-Akap1	A-kinase anchor protein 1, mitochondrial (LOC763319), transcript variant X1, mRNA	SPU_002839	RNA binding	Tudor domain; KH domain	NA
4.9089e-13	0.327006	0.141	0.054	7.64758e-09	apical plate	WHL22.630154	Sp-Hox7; Sp-Hox7_1	homeobox hox 1 (hox1), mRNA	SPU_002634; SPU_005170	NA	NA	TranscriptionFactor_Homeo
4.93573e-13	0.296841	0.093	0.029	7.68938e-09	apical plate	WHL22.529372	Sp-C4orf41_2	trafficking protein particle complex subunit 11 (LOC576009), mRNA	SPU_028464	NA	Foie gras liver health family 1	NA
5.29336e-13	0.40386	0.126	0.047	8.24653e-09	apical plate	WHL22.163671	Sp-Rt25	coiled-coil domain-containing protein 34 (LOC100888603), mRNA	SPU_005589	RNA-dependent DNA replication; RNA binding; RNA-directed DNA polymerase activity	Reverse transcriptase (RNA-dependent DNA polymerase)	DNA_Replication
5.38469e-13	0.305184	0.075	0.021	8.3888e-09	apical plate	WHL22.158895	WHL22.158895	uncharacterized LOC100889257 (LOC100889257), mRNA	NA	NA	NA	NA
5.46099e-13	0.417469	0.234	0.115	8.50768e-09	apical plate	WHL22.5670	Sp-Hypp_1613	uncharacterized LOC105437799 (LOC105437799), ncRNA	SPU_005889	NA	DDE superfamily endonuclease	NA
5.88401e-13	0.265274	0.136	0.052	9.1667e-09	apical plate	WHL22.398634	Sp-Yl1	vacuolar protein sorting-associated protein 72 homolog (LOC763676), mRNA	SPU_025979	regulation of transcription; DNA-templated; nucleus	YL1 nuclear protein; YL1 nuclear protein C-terminal domain	NucleicAcid_Binding
6.07964e-13	0.270975	0.093	0.029	9.47147e-09	apical plate	WHL22.442123	Sp-Prss7; Sp-Prrs7L; Sp-Sea/Ldla/Cub	uncharacterized LOC579807 (LOC579807), mRNA	SPU_004416; SPU_011490; SPU_016171	proteolysis; catalytic activity; serine-type endopeptidase activity; protein binding	Trypsin; CUB domain; Low-density lipoprotein receptor domain class A	Metabolism_AminoAcid
7.0069e-13	0.347712	0.186	0.082	1.09161e-08	apical plate	WHL22.2848	Sp-Hmg2l1	HMG box-containing protein 4 (LOC575292), transcript variant X3, mRNA	SPU_000793	NA	HMG (high mobility group) box	Unclassified
7.0267e-13	0.41379	0.425	0.26	1.09469e-08	apical plate	WHL22.504151	Sp-Bctg1	protein BTG1-like (LOC581217), mRNA	SPU_021548	NA	BTG family	Transcription_Regulation
7.70338e-13	0.423451	0.279	0.147	1.20011e-08	apical plate	WHL22.665661	WHL22.665661	protein FAM50A-A (LOC753921), transcript variant X1, mRNA	NA	NA	NA	NA
7.8675e-13	0.454859	0.116	0.042	1.22568e-08	apical plate	WHL22.751984	Sp-Ttrspn_1	tetraspanin-4 (LOC593238), mRNA	SPU_001195	integral component of membrane	Tetraspanin family	Transmembrane
8.07697e-13	0.483295	0.148	0.061	1.25831e-08	apical plate	WHL22.565948	Sp-Lrr/Gpcr_9	uncharacterized LOC100891211 (LOC100891211), mRNA	SPU_024052	G-protein coupled receptor signaling pathway; G-protein coupled receptor activity; integral component of membrane	7 transmembrane receptor (rhodopsin family); Leucine Rich repeat; Serpentine type 7TM GPCR chemoreceptor Srx	Adhesion_LRRReceptor
8.27419e-13	0.254237	0.053	0.012	1.28904e-08	apical plate	WHL22.769475	Sp-Agrin/Nt; Sp-Garnl1_1; Sp-Garnl1	ral GTPase-activating protein subunit alpha-1 (LOC574609), mRNA	SPU_002025; SPU_008313; SPU_023287	G-protein coupled acetylcholine receptor signaling pathway; receptor clustering; laminin binding; basal lamina	Agrin NtA domain	Adhesion_ECM
8.86714e-13	0.361426	0.083	0.025	1.38141e-08	apical plate	WHL22.615298	Sp-Scn5a	sodium channel protein type 4 subunit alpha B (LOC588616), mRNA	SPU_025997	ion transport; sodium ion transport; transmembrane transport; ion channel activity; voltage-gated sodium channel activity; voltage-gated sodium channel complex; membrane	Ion transport protein; Polycystin cation channel	Fertilization
9.10993e-13	0.351486	0.08	0.024	1.41924e-08	apical plate	WHL22.391924	Sp-Whrn	whirlin (LOC588790), transcript variant X1, mRNA	SPU_015412	protein binding	PDZ domain; PDZ domain; PDZ domain	Unclassified
1.02667e-12	0.300401	0.085	0.026	1.59945e-08	apical plate	WHL22.236770	Sp-Sirt7	NAD-dependent protein deacetylase sirtuin-7 (LOC762797), mRNA	SPU_011466	NAD+ binding	Sir2 family	Hydrolase
1.12251e-12	0.276012	0.053	0.012	1.74876e-08	apical plate	WHL22.523159	Sp-Socs7	uncharacterized LOC588073 (LOC588073), mRNA	SPU_010245	intracellular signal transduction; protein binding	SOCS box; SH2 domain	ImmuneSystem_Signal
1.38557e-12	0.262568	0.045	0.009	2.15858e-08	apical plate	WHL22.128205	Sp-Spz12_1	DNA-binding protein with twelve Zn fingers (SpZ12-1), mRNA	SPU_025346	nucleic acid binding; metal ion binding	Zinc-finger double domain; Zinc finger, C2H2 type; C2H2-type zinc finger	ZincFinger
1.55733e-12	0.36519	0.168	0.072	2.42617e-08	apical plate	WHL22.332253	Sp-Rsf1; Sp-Ucm	remodeling and spacing factor 1 (LOC578189), transcript variant X1, mRNA	SPU_003856; SPU_005818	protein binding; zinc ion binding	PHD-finger	NA
1.82771e-12	0.428589	0.264	0.139	2.84739e-08	apical plate	WHL22.700448	Sp-Papd5	non-canonical poly(A) RNA polymerase PAPD5 (LOC592046), mRNA	SPU_002842	nucleotidyltransferase activity	Cid1 family poly A polymerase; Nucleotidyltransferase domain	mRNA_Modifier
1.8636e-12	0.295606	0.055	0.013	2.90329e-08	apical plate	WHL22.418817	SPU_024279	uncharacterized LOC105442771 (LOC105442771), transcript variant X1, mRNA	SPU_024279	NA	NA	NA
1.87888e-12	0.317633	0.824	0.644	2.92711e-08	apical plate	WHL22.130781	SPU_013329	protein SPEC3-like (LOC578575), mRNA	SPU_013329	NA	Ectodermal ciliogenesis protein	NA
1.9481e-12	0.265216	0.065	0.017	3.03494e-08	apical plate	WHL22.642127	WHL22.642127	uncharacterized LOC100891165 (LOC100891165), transcript variant X1, mRNA	NA	NA	NA	NA
1.95171e-12	0.370545	0.121	0.045	3.04057e-08	apical plate	WHL22.514751	Sp-Hypp_2417	uncharacterized LOC592260 (LOC592260), mRNA	SPU_019044	NA	CXC domain of E3 ubiquitin-protein ligase MSL2; zinc RING finger of MSL2	NA
2.02661e-12	0.419491	0.101	0.034	3.15725e-08	apical plate	WHL22.471008	Sp-Mast2	microtubule-associated serine/threonine-protein kinase 3 (LOC590093), mRNA	SPU_022164	protein phosphorylation; magnesium ion binding; protein kinase activity; protein serine/threonine kinase activity; protein binding; ATP binding; transferase activity; transferring phosphorus-containing groups	Domain of unknown function (DUF1908); Protein kinase domain; Protein tyrosine kinase	Kinase_AGC
2.06064e-12	0.36693	0.156	0.065	3.21027e-08	apical plate	WHL22.381228	SPU_025101	zinc finger CCCH domain-containing protein 13 (LOC100890483), mRNA	SPU_025101	NA	NA	NA
2.13137e-12	0.296586	0.299	0.156	3.32046e-08	apical plate	WHL22.198511	Sp-Duoxa1	dual oxidase maturation factor 1 (LOC576350), transcript variant X2, mRNA	SPU_025513	protein transport; endoplasmic reticulum membrane; integral component of membrane	Dual oxidase maturation factor	Oxidase
2.46853e-12	0.376219	0.151	0.063	3.84572e-08	apical plate	WHL22.609273	Sp-Mia3	melanoma inhibitory activity protein 3 (LOC757237), transcript variant X4, mRNA	SPU_001261	NA	NA	NA
2.69551e-12	0.374746	0.266	0.138	4.19934e-08	apical plate	WHL22.293709	SPU_023297	disks large-associated protein 5 (LOC574582), mRNA	SPU_023297	NA	NA	NA
3.08851e-12	0.44026	0.186	0.084	4.81158e-08	apical plate	WHL22.733136	SPU_003077	heme-binding protein 2 (LOC581007), mRNA	SPU_003077	NA	SOUL heme-binding protein	NA
3.26684e-12	0.263545	0.038	0.007	5.08942e-08	apical plate	WHL22.756570	Sp-Hypp_706	zinc finger CCCH domain-containing protein 4 (LOC100892284), mRNA	SPU_013193	NA	NA	NA
3.57318e-12	0.342252	0.116	0.042	5.56665e-08	apical plate	WHL22.653011	Sp-Mll3	histone-lysine N-methyltransferase 2C (LOC591084), transcript variant X10, mRNA	SPU_026465	histone H3-K4 methylation; protein binding; zinc ion binding; histone-lysine N-methyltransferase activity; nucleus	PHD-finger; F/Y rich C-terminus; F/Y-rich N-terminus	TranscriptionFactor_Other
3.59205e-12	0.293965	0.095	0.032	5.59606e-08	apical plate	WHL22.702738	Sp-Chst12_1; Sp-MplL	uncharacterized LOC593798 (LOC593798), transcript variant X1, mRNA	SPU_022658; SPU_022659	carbohydrate biosynthetic process; sulfotransferase activity; integral component of membrane	Sulfotransferase family	Transferase
3.6907e-12	0.375794	0.219	0.107	5.74974e-08	apical plate	WHL22.734061	SPU_007836	serine/threonine-protein kinase fray2 (LOC754248), mRNA	SPU_007836	NA	NA	NA
3.70925e-12	0.271692	0.07	0.02	5.77865e-08	apical plate	WHL22.212879	Sp-Hypp_3108	myosin-9 (LOC100888564), mRNA	SPU_001853	NA	NA	NA
3.9633e-12	0.303095	0.05	0.012	6.17442e-08	apical plate	WHL22.629743	Sp-Evc2L	myosin heavy chain, fast skeletal muscle (LOC100892888), transcript variant X1, mRNA	SPU_018133	smoothened signaling pathway	Ellis van Creveld protein 2 like protein	NA
4.09449e-12	0.280517	0.065	0.018	6.3788e-08	apical plate	WHL22.673449	Sp-Hypp_2136; Sp-Hypp_159	dentin sialophosphoprotein-like (LOC105447623), mRNA	SPU_014198; SPU_019745	intracellular protein transport; Rab GTPase binding	FYVE-type zinc finger	NA
4.11792e-12	0.285097	0.106	0.037	6.41531e-08	apical plate	WHL22.686165	Sp-Jmjd2c; Sp-Kdm4aL; SPU_021070; SPU_021972	lysine-specific demethylase 4C (LOC579470), mRNA	SPU_012300; SPU_020051; SPU_021070; SPU_021972	NA	JmjC domain, hydroxylase	NA
4.30456e-12	0.345123	0.053	0.013	6.70608e-08	apical plate	WHL22.35574	Sp-Pst	CMP-N-acetylneuraminate-poly-alpha-2,8-sialyltransferase-like (LOC576186), transcript variant X1, misc_RNA	SPU_028709	protein glycosylation; sialyltransferase activity	Glycosyltransferase family 29 (sialyltransferase)	Transferase
5.09064e-12	0.261474	0.045	0.01	7.93071e-08	apical plate	WHL22.735911	Sp-Hypp_266	uncharacterized LOC100892044 (LOC100892044), mRNA	SPU_027338	protein binding	WD domain, G-beta repeat	Unclassified
5.83927e-12	0.316999	0.354	0.202	9.097e-08	apical plate	WHL22.446908	Sp-Hairy2/4	hairy and enhancer of split (Hes), mRNA	SPU_006814	regulation of transcription; DNA-templated; DNA binding; protein dimerization activity	Helix-loop-helix DNA-binding domain; Hairy Orange	Signaling_Notch
5.89096e-12	0.382889	0.204	0.098	9.17753e-08	apical plate	WHL22.448005	SPU_005905	uncharacterized LOC105444344 (LOC105444344), transcript variant X3, mRNA	SPU_005905	NA	NA	NA
5.91212e-12	0.253351	0.055	0.014	9.21049e-08	apical plate	WHL22.573042	Sp-NpC2L_1; Sp-NpC2L; Sp-Patched; Sp-Ptch1	protein patched homolog 1 (LOC593924), transcript variant X2, mRNA	SPU_003312; SPU_003313; SPU_014295; SPU_022844	NA	NA	NA
6.81917e-12	0.482025	0.367	0.225	1.06236e-07	apical plate	WHL22.421612	Sp-Rreb1	ras-responsive element-binding protein 1 (LOC578691), mRNA	SPU_009642	nucleic acid binding; metal ion binding	Zinc finger, C2H2 type; C2H2-type zinc finger; Zinc-finger double domain	ZincFinger
7.31125e-12	0.355662	0.141	0.058	1.13902e-07	apical plate	WHL22.97851	Sp-Hypp_3089; Sp-Sorbs1	vinexin (LOC574636), transcript variant X4, mRNA	SPU_003449; SPU_003450	NA	Sorbin homologous domain	Unclassified
7.52896e-12	0.275305	0.08	0.025	1.17294e-07	apical plate	WHL22.683064	Sp-Hypp_3068	microtubule-associated protein futsch (LOC100888674), transcript variant X3, mRNA	SPU_008559	NA	NA	NA
7.54106e-12	0.260339	0.085	0.027	1.17482e-07	apical plate	WHL22.711246	Sp-Smg6h; Sp-Smg6L	telomerase-binding protein EST1A (LOC589683), transcript variant X1, mRNA	SPU_003358; SPU_023774	protein binding	Est1 DNA/RNA binding domain; PIN domain	Unclassified
9.24022e-12	0.294775	0.123	0.047	1.43953e-07	apical plate	WHL22.71982	Sp-Srgap3; Sp-Srgap; Sp-Srgap_1	SLIT-ROBO Rho GTPase-activating protein 1 (LOC594484), transcript variant X1, mRNA	SPU_022632; SPU_027143; SPU_027715	signal transduction; protein binding; intracellular	RhoGAP domain; SH3 domain; Variant SH3 domain	GTPase_RhoRegulator
9.67974e-12	0.363715	0.307	0.17	1.50801e-07	apical plate	WHL22.360754	WHL22.360754	annexin A7 (LOC100888638), mRNA	NA	NA	NA	NA
9.83541e-12	0.475831	0.432	0.286	1.53226e-07	apical plate	WHL22.119246	Sp-Hypp_308; SPU_000571	uncharacterized LOC591078 (LOC591078), mRNA	SPU_000570; SPU_000571	NA	NA	NA
9.92187e-12	0.302064	0.136	0.054	1.54573e-07	apical plate	WHL22.59629	Sp-Mylip	E3 ubiquitin-protein ligase MYLIP-A (LOC585541), mRNA	SPU_017256	protein binding; zinc ion binding; cytoskeleton	FERM N-terminal domain; Zinc finger, C3HC4 type (RING finger); FERM central domain	Cytoskeleton_Myosin
1.04124e-11	0.379934	0.113	0.042	1.62215e-07	apical plate	WHL22.530450	WHL22.530450	regulator of nonsense transcripts 3A (LOC574684), partial mRNA	NA	NA	NA	NA
1.07466e-11	0.523088	0.209	0.104	1.67422e-07	apical plate	WHL22.769469	Sp-C1orf173L	glutamate-rich protein 3 (LOC590109), transcript variant X1, mRNA	SPU_020097	NA	Domain of unknown function (DUF4590); Leucine Rich repeat	NA
1.25995e-11	0.431049	0.078	0.024	1.96287e-07	apical plate	WHL22.193643	Sp-Hypp_1292; SPU_009979	centrosome and spindle pole-associated protein 1 (LOC584426), mRNA	SPU_000916; SPU_009979	NA	NA	NA
1.26081e-11	0.282272	0.083	0.026	1.96422e-07	apical plate	WHL22.326706	Sp-Cep164L	centrosomal protein of 164 kDa (LOC579592), mRNA	SPU_021618	protein binding	WW domain	Unclassified
1.42584e-11	0.336112	0.138	0.056	2.22131e-07	apical plate	WHL22.505726	Sp-Atad2	ATPase family AAA domain-containing protein 2 (LOC585573), mRNA	SPU_001508	nucleotide binding; protein binding; ATP binding; nucleoside-triphosphatase activity	ATPase family associated with various cellular activities (AAA); Bromodomain; AAA+ lid domain	NA
1.55423e-11	0.430805	0.108	0.04	2.42133e-07	apical plate	WHL22.36523	Sp-Zinc318L	serine/arginine repetitive matrix protein 2 (LOC579108), mRNA	SPU_005307	nucleic acid binding; zinc ion binding	NA	NA
1.74006e-11	0.298115	0.048	0.011	2.71084e-07	apical plate	WHL22.421470	SPU_007153; Sp-Ranbp9L	ran-binding protein 9 (LOC579137), mRNA	SPU_007153; SPU_009648	NA	CTLH/CRA C-terminal to LisH motif domain	NA
1.75139e-11	0.416183	0.216	0.108	2.72849e-07	apical plate	WHL22.35639	Sp-Hypp_1629	bromodomain-containing protein 4 (LOC593797), partial mRNA	SPU_006091	NA	NA	NA
1.83291e-11	0.422781	0.161	0.072	2.85548e-07	apical plate	WHL22.160026	Sp-Spsb3	SPRY domain-containing SOCS box protein 3-like (LOC575151), mRNA	SPU_023964	intracellular signal transduction; protein binding	SPRY domain	NA
1.88518e-11	0.251185	0.055	0.014	2.93691e-07	apical plate	WHL22.635158	SPU_001972; SPU_010669; SPU_015561; Sp-Stag3; Sp-Stag1	cohesin subunit SA-1 (LOC592465), mRNA	SPU_001972; SPU_010669; SPU_015561; SPU_017052; SPU_018878	NA	NA	NA
1.88538e-11	0.261689	0.078	0.024	2.93723e-07	apical plate	WHL22.732581	Sp-Tsg	twisted gastrulation protein homolog 1-A (LOC589376), mRNA	SPU_009756	NA	Twisted gastrulation (Tsg) protein conserved region	Signaling_TGFB_Modulator
2.00419e-11	0.401133	0.128	0.052	3.12233e-07	apical plate	WHL22.348341	SPU_002149	origin recognition complex subunit 1 (LOC594443), mRNA	SPU_002149	chromatin binding	NA	Unclassified
2.16193e-11	0.301309	0.178	0.082	3.36806e-07	apical plate	WHL22.223192	Sp-Cutl; Sp-Cutl1cl	protein CASP (LOC575361), transcript variant X2, mRNA	SPU_003595; SPU_003596	regulation of transcription; DNA-templated; DNA binding; sequence-specific DNA binding transcription factoractivity; sequence-specific DNA binding; nucleus	CUT domain; Homeodomain	TranscriptionFactor_Homeo
2.21652e-11	0.275583	0.098	0.034	3.45312e-07	apical plate	WHL22.641780	Sp-Hypp_2997	sarcoplasmic reticulum histidine-rich calcium-binding protein (LOC100890364), transcript variant X1, mRNA	SPU_017658	NA	NA	NA
2.28715e-11	0.323832	0.198	0.094	3.56316e-07	apical plate	WHL22.335751	Sp-Akt_1	RAC serine/threonine-protein kinase (LOC582897), transcript variant X1, mRNA	SPU_017694	protein phosphorylation; protein kinase activity; protein serine/threonine kinase activity; ATP binding; transferase activity; transferring phosphorus-containing groups	Protein kinase domain; Protein tyrosine kinase; Kinase-like	Kinase_AGC
2.41875e-11	0.288291	0.106	0.038	3.76816e-07	apical plate	WHL22.436647	WHL22.436647	coiled-coil domain-containing protein 66 (LOC581879), mRNA	NA	NA	NA	NA
2.55093e-11	0.376184	0.405	0.256	3.9741e-07	apical plate	WHL22.744314	SPU_006804	ubiquitin-conjugating enzyme E2 R2 (LOC585461), mRNA	SPU_006804	acid-amino acid ligase activity	Ubiquitin-conjugating enzyme	Ubiquitin_Modifier
2.68714e-11	0.340176	0.103	0.038	4.1863e-07	apical plate	WHL22.756119	Sp-Tada2b	transcriptional adapter 2-beta-like (LOC105437259), mRNA	SPU_024722	DNA binding; chromatin binding	Myb-like DNA-binding domain	NA
2.69066e-11	0.438426	0.141	0.059	4.19178e-07	apical plate	WHL22.61754	Sp-Nodal	nodal (LOC579010), mRNA	SPU_011064	growth; growth factor activity	Transforming growth factor beta like domain; TGF-beta propeptide	Signaling_TGFB_Ligand
2.7631e-11	0.398499	0.131	0.053	4.30464e-07	apical plate	WHL22.566307	Sp-Hypp_513; Sp-Hypp_604	FK506-binding protein 5 (LOC575264), mRNA	SPU_007394; SPU_010077	NA	NA	NA
2.94515e-11	0.305936	0.07	0.021	4.58826e-07	apical plate	WHL22.12871	Sp-Daple	girdin (LOC577479), transcript variant X2, mRNA	SPU_020054	NA	HOOK protein	NA
3.1706e-11	0.276368	0.065	0.019	4.93948e-07	apical plate	WHL22.350054	Sp-Polrmt; Sp-Polrmt_1; SPU_020939	DNA-directed RNA polymerase, mitochondrial (LOC762772), mRNA	SPU_003910; SPU_019062; SPU_020939	transcription; DNA-templated; DNA binding; DNA-directed RNA polymerase activity	PPR repeat family	NA
3.3183e-11	0.26272	0.083	0.027	5.16957e-07	apical plate	WHL22.422884	SPU_022776; Sp-Gulp1	PTB domain-containing engulfment adapter protein 1 (LOC575102), transcript variant X4, mRNA	SPU_022776; SPU_023975	NA	NA	NA
3.466e-11	0.353667	0.126	0.05	5.39968e-07	apical plate	WHL22.721131	Sp-St6L	ST8 alpha-N-acetyl-neuraminide alpha-2,8-sialyltransferase 3 (LOC100144872), transcript variant X1, mRNA	SPU_027363	protein glycosylation; sialyltransferase activity	Glycosyltransferase family 29 (sialyltransferase)	Metabolism_Carbohydrate
3.79204e-11	0.275476	0.126	0.05	5.90763e-07	apical plate	WHL22.45389	Sp-Hypp_695; Sp-Hypp_83	microtubule-associated protein futsch (LOC100893512), transcript variant X2, mRNA	SPU_012833; SPU_012879	NA	PTHB1 N-terminus	NA
3.8168e-11	0.368934	0.196	0.094	5.94619e-07	apical plate	WHL22.72065	Sp-Slc20a1_2; Sp-Slc20a1	sodium-dependent phosphate transporter 2 (LOC582615), mRNA	SPU_019683; SPU_024790	phosphate ion transport; inorganic phosphate transmembrane transporter activity; membrane	Phosphate transporter family	Metabolism_InorganicIon
4.0491e-11	0.420091	0.156	0.069	6.3081e-07	apical plate	WHL22.713685	Sp-GadD45	growth arrest and DNA damage-inducible protein GADD45 alpha (LOC100893493), transcript variant X2, mRNA	SPU_026064	response to stress; regulation of cell cycle; nucleus	NA	NA
4.88646e-11	0.336032	0.106	0.039	7.61262e-07	apical plate	WHL22.84608	SPU_002170; Sp-Hypp_868; Sp-Nbn1; Sp-Hypp_869	neurabin-1 (LOC577610), transcript variant X6, mRNA	SPU_002170; SPU_017260; SPU_017261; SPU_017262	NA	PDZ domain	NA
4.89372e-11	0.310243	0.088	0.03	7.62393e-07	apical plate	WHL22.719479	SPU_028208	bromodomain-containing protein 9-like (LOC105446825), partial mRNA	SPU_028208	protein binding	Bromodomain	Unclassified
5.06777e-11	0.415811	0.111	0.042	7.89509e-07	apical plate	WHL22.55091	Sp-Atrx	transcriptional regulator ATRX homolog (LOC578567), mRNA	SPU_001388	nucleic acid binding; DNA binding; helicase activity; ATP binding	SNF2 family N-terminal domain; Cysteine Rich ADD domain; Helicase conserved C-terminal domain	NucleicAcid_Helicase
5.18454e-11	0.330201	0.118	0.046	8.077e-07	apical plate	WHL22.162585	Sp-Hypp_1283	trichohyalin (LOC580810), mRNA	SPU_000712	NA	NA	NA
5.30009e-11	0.263067	0.131	0.053	8.25701e-07	apical plate	WHL22.549324	SPU_007031	uncharacterized LOC577784 (LOC577784), transcript variant X1, mRNA	SPU_007031	NA	NA	NA
6.23023e-11	0.270542	0.08	0.026	9.70607e-07	apical plate	WHL22.424756	WHL22.424756	NA	NA	NA	NA	NA
6.57546e-11	0.253255	0.033	0.006	1.02439e-06	apical plate	WHL22.161618	Sp-Hp_Loc200403L_1; Sp-Vw3b	von Willebrand factor A domain-containing protein 3B (LOC581386), partial mRNA	SPU_005867; SPU_014559	NA	von Willebrand factor type A domain	NA
6.72788e-11	0.384361	0.143	0.062	1.04814e-06	apical plate	WHL22.756114	Sp-Mcl	bcl-2-like protein 2 (LOC582436), mRNA	SPU_010786	regulation of apoptotic process	Apoptosis regulator proteins, Bcl-2 family	Apoptosis_Bcl2
6.93222e-11	0.377156	0.543	0.411	1.07997e-06	apical plate	WHL22.39103	Sp-Pdcd6ip_2	galectin-3-binding protein B-like (LOC584637), mRNA	SPU_009210	scavenger receptor activity; protein binding; membrane	Scavenger receptor cysteine-rich domain; ALIX V-shaped domain binding to HIV	Unclassified
7.2758e-11	0.313224	0.058	0.016	1.1335e-06	apical plate	WHL22.698932	WHL22.698932	uncharacterized LOC100891166 (LOC100891166), transcript variant X2, mRNA	NA	NA	NA	NA
7.40075e-11	0.357872	0.307	0.175	1.15296e-06	apical plate	WHL22.707096	Sp-Lrpap1L	alpha-2-macroglobulin receptor-associated protein (LOC592560), mRNA	SPU_005959	heparin binding; low-density lipoprotein particle receptor binding; endoplasmic reticulum	Alpha-2-macroglobulin RAP, C-terminal domain; Alpha-2-macroglobulin RAP, N-terminal domain	ImmuneSystem_Misc
8.10544e-11	0.395811	0.286	0.162	1.26275e-06	apical plate	WHL22.420899	Sp-Ccdc37	coiled-coil domain-containing protein 37 (LOC581889), mRNA	SPU_021034	NA	Domain of unknown function (DUF4200)	NA
8.40863e-11	0.310087	0.535	0.364	1.30998e-06	apical plate	WHL22.688668	Sp-rsp3h	radial spoke head protein 3 homolog (LOC578469), transcript variant X1, mRNA	SPU_012045	NA	Radial spoke protein 3	Cytoskeleton_RadialSpoke
8.81217e-11	0.38056	0.307	0.175	1.37285e-06	apical plate	WHL22.262913	Sp-Oad_bp58	tetratricopeptide repeat protein 25 (LOC581183), transcript variant X4, mRNA	SPU_015625	protein binding	Tetratricopeptide repeat; Tetratricopeptide repeat; Tetratricopeptide repeat	Cytoskeleton_Dynein
8.83439e-11	0.355274	0.226	0.117	1.37631e-06	apical plate	WHL22.318085	Sp-Jun	transcription factor AP-1-like (LOC588294), mRNA	SPU_003102	regulation of transcription; DNA-templated; DNA binding; sequence-specific DNA binding transcription factoractivity; sequence-specific DNA binding; nucleus	Jun-like transcription factor; bZIP transcription factor; bZIP Maf transcription factor	Signaling_TGFB_SmadInteract
8.87982e-11	0.282007	0.085	0.029	1.38339e-06	apical plate	WHL22.2869	SPU_000795	tctex1 domain-containing protein 2-like (LOC100887991), mRNA	SPU_000795	NA	Tctex-1 family	NA
1.03448e-10	0.392496	0.221	0.114	1.61162e-06	apical plate	WHL22.38552	Sp-Casc1	protein CASC1 (LOC582795), mRNA	SPU_022570	NA	Cancer susceptibility candidate 1 N-terminus; Cancer susceptibility candidate 1	NA
1.09491e-10	0.278363	0.073	0.023	1.70575e-06	apical plate	WHL22.570743	Sp-SfpqL	paraspeckle component 1 (LOC593522), transcript variant X2, mRNA	SPU_015145	nucleotide binding; nucleic acid binding	RNA recognition motif. (a.k.a. RRM, RBD, or RNP domain); NOPS (NUC059) domain	Unclassified
1.12471e-10	0.276693	0.279	0.153	1.75219e-06	apical plate	WHL22.126531	Sp-Abcb1b; Sp-Abcb1_1	multidrug resistance protein 1 (LOC587897), transcript variant X3, mRNA	SPU_002431; SPU_008660	transport; transmembrane transport; nucleotide binding; ATP binding; ATPase activity; nucleoside-triphosphatase activity; ATPase activity; coupled to transmembrane movement ofsubstances; integral component of membrane	ABC transporter transmembrane region; ABC transporter; RecF/RecN/SMC N terminal domain	Defensome_ABCTransporter
1.37351e-10	0.324972	0.131	0.055	2.13979e-06	apical plate	WHL22.361609	Sp-Fut4_1	glycoprotein 3-alpha-L-fucosyltransferase A-like (LOC582389), transcript variant X1, mRNA	SPU_017799	protein glycosylation; fucosyltransferase activity; membrane	Glycosyltransferase family 10 (fucosyltransferase) C-term; Fucosyltransferase, N-terminal	Transferase
1.52007e-10	0.39366	0.392	0.253	2.36811e-06	apical plate	WHL22.13463	Sp-Srcr74	uncharacterized LOC105441516 (LOC105441516), ncRNA	SPU_009145	scavenger receptor activity; membrane	Scavenger receptor cysteine-rich domain; Scavenger receptor cysteine-rich domain	ImmuneSystem_Receptor_SRCR
1.5422e-10	0.295419	0.065	0.019	2.40259e-06	apical plate	WHL22.73091	Sp-Rims; Sp-Rims_1; Sp-Rims2; SPU_024621	regulating synaptic membrane exocytosis protein 2 (LOC589670), transcript variant X6, mRNA	SPU_003760; SPU_003908; SPU_006536; SPU_024621	protein binding	C2 domain	Nervous_SynapticVesicleRelease
1.54981e-10	0.268752	0.098	0.036	2.41444e-06	apical plate	WHL22.531966	Sp-Prox1	prospero homeobox protein 1 (LOC576148), transcript variant X3, mRNA	SPU_015984	regulation of transcription; DNA-templated; multicellular organismal development; DNA binding; nucleus	Homeo-prospero domain	TranscriptionFactor_Homeo
1.635e-10	0.250953	0.148	0.064	2.54717e-06	apical plate	WHL22.496950	SPU_016001; Sp-Abcc9; Sp-Abcc9l	ATP-binding cassette sub-family C member 9-like (LOC586814), mRNA	SPU_016001; SPU_016002; SPU_023457	nucleotide binding; ATP binding; ATPase activity; nucleoside-triphosphatase activity	ABC transporter; RecF/RecN/SMC N terminal domain; AAA domain, putative AbiEii toxin, Type IV TA system	NA
1.6351e-10	0.288335	0.02	0.003	2.54732e-06	apical plate	WHL22.166889	Sp-Hypp_1244	uncharacterized LOC105438903 (LOC105438903), ncRNA	SPU_000133	NA	NA	NA
1.84704e-10	0.308049	0.088	0.031	2.87751e-06	apical plate	WHL22.331400	WHL22.331400	uncharacterized protein PF11_0207 (LOC100892358), mRNA	NA	NA	NA	NA
1.87254e-10	0.30921	0.239	0.125	2.91723e-06	apical plate	WHL22.682702	Sp-Ing4	inhibitor of growth protein 4 (LOC589170), mRNA	SPU_006666	negative regulation of cell proliferation; chromatin modification; histone acetylation; protein binding; zinc ion binding; nucleus; MOZ/MORF histone acetyltransferase complex	Inhibitor of growth proteins N-terminal histone-binding; PHD-finger	NA
1.97735e-10	0.25597	0.045	0.011	3.08051e-06	apical plate	WHL22.767006	Sp-Fn3/Igf_20	ciliary neurotrophic factor receptor subunit alpha (LOC100892819), mRNA	SPU_009039	protein binding	Fibronectin type III domain; Purple acid Phosphatase, N-terminal domain	Adhesion_IgFN3Receptor
2.1365e-10	0.298898	0.279	0.154	3.32846e-06	apical plate	WHL22.718134	Sp-LRP2BP	LRP2-binding protein (LOC592640), transcript variant X2, mRNA	SPU_019817	protein binding	Sel1 repeat	Unclassified
2.58772e-10	0.424034	0.08	0.027	4.0314e-06	apical plate	WHL22.732657	Sp-Hypp_449; Sp-Fhod3; Sp-Fhod3_1; Sp-Fh1/Fh2cph	FH1/FH2 domain-containing protein 3 (LOC587533), mRNA	SPU_005488; SPU_005489; SPU_023139; SPU_025223	NA	NA	NA
2.63955e-10	0.309529	0.151	0.068	4.11215e-06	apical plate	WHL22.530550	Sp-Pold3	DNA polymerase delta subunit 3 (LOC586784), mRNA	SPU_006134	DNA replication; nucleus	DNA polymerase subunit Cdc27	DNA_Replication
2.66723e-10	0.467505	0.158	0.074	4.15527e-06	apical plate	WHL22.324858	Sp-Fbn2L_1; Sp-Hypp_87; Sp-Hypp_702; Sp-Hypp_2279	fibrillin-2-like (LOC105436405), transcript variant X1, mRNA	SPU_008613; SPU_013077; SPU_013078; SPU_016774	extracellular matrix structural constituent; calcium ion binding; protein binding; proteinaceous extracellular matrix	EGF domain; Calcium-binding EGF domain; Complement Clr-like EGF-like	NA
2.7347e-10	0.349445	0.211	0.108	4.26039e-06	apical plate	WHL22.478806	Sp-Nefl	nuclear intermediate filament protein (LOC373247), mRNA	SPU_002219	structural molecule activity; nuclear inner membrane; lamin filament; intermediate filament	Intermediate filament protein; Lamin Tail Domain	NA
2.90792e-10	0.340709	0.181	0.086	4.53024e-06	apical plate	WHL22.323554	Sp-Slc28a3_1	solute carrier family 28 member 3 (LOC574602), transcript variant X3, mRNA	SPU_015966	transport; nucleoside binding; nucleoside:sodium symporter activity; membrane	Na+ dependent nucleoside transporter C-terminus; Na+ dependent nucleoside transporter N-terminus; Nucleoside recognition	Transporter_Nucleoside
2.93718e-10	0.346032	0.075	0.025	4.57584e-06	apical plate	WHL22.703976	Sp-FatL1; Sp-Cadherin_9	protocadherin Fat 1 (LOC580257), mRNA	SPU_002742; SPU_027356	cell adhesion; homophilic cell adhesion; calcium ion binding; plasma membrane; membrane	Cadherin domain; Cadherin-like; Cadherin-like	Adhesion_Cadherin
2.94832e-10	0.279238	0.053	0.014	4.59318e-06	apical plate	WHL22.678547	WHL22.678547	mediator of RNA polymerase II transcription subunit 15 (LOC757107), mRNA	NA	NA	NA	NA
3.06653e-10	0.262051	0.196	0.097	4.77735e-06	apical plate	WHL22.400410	SPU_008667; SPU_011099; Sp-Ap2a2	AP-2 complex subunit alpha (LOC591422), mRNA	SPU_008667; SPU_011099; SPU_024893	binding	NA	NA
3.14165e-10	0.340674	0.048	0.012	4.89438e-06	apical plate	WHL22.192550	Sp-Sf3B1; Sp-Sf3B1_1	splicing factor 3B subunit 1 (LOC590531), mRNA	SPU_010463; SPU_024100	binding	Splicing factor 3B subunit 1	NucleicAcid_RNA-Processing
3.51494e-10	0.4982	0.183	0.091	5.47593e-06	apical plate	WHL22.471216	WHL22.471216	transcription elongation factor SPT6 (LOC752350), mRNA	NA	NA	NA	NA
3.56276e-10	0.279143	0.073	0.023	5.55043e-06	apical plate	WHL22.152875	Sp-Hmx	homeobox (H-6 family) (HMX), mRNA	SPU_012490	NA	NA	NA
3.73755e-10	0.370324	0.108	0.043	5.82272e-06	apical plate	WHL22.626964	Sp-Gripap1	GRIP1-associated protein 1 (LOC582243), transcript variant X1, mRNA	SPU_012870	NA	NA	NA
3.78685e-10	0.324846	0.156	0.071	5.89954e-06	apical plate	WHL22.534857	Sp-Rassf5	ras association domain-containing protein 1 (LOC100888845), transcript variant X3, mRNA	SPU_007097	signal transduction	Novel Ras effector 1 C-terminal SARAH (Sav/Rassf/Hpo) domain; Ras association (RalGDS/AF-6) domain	Dehydrogenase
4.21572e-10	0.330817	0.156	0.072	6.56766e-06	apical plate	WHL22.310079	Sp-PpiL2; Sp-Pdpi(cyclophilin)L10	peptidyl-prolyl cis-trans isomerase-like 2 (LOC756350), mRNA	SPU_008469; SPU_008587	protein ubiquitination; ubiquitin-protein ligase activity; ubiquitin ligase complex	Rtf2 RING-finger	NA
4.50519e-10	0.341503	0.166	0.078	7.01863e-06	apical plate	WHL22.649215	Sp-Wasf2	wiskott-Aldrich syndrome protein family member 2 (LOC576417), mRNA	SPU_023423	actin cytoskeleton organization; actin binding; cytoskeleton	WH2 motif	NA
4.57391e-10	0.468575	0.075	0.025	7.1257e-06	apical plate	WHL22.523242	Sp-Hypp_2625	uncharacterized LOC763377 (LOC763377), mRNA	SPU_022720	NA	NA	NA
4.79363e-10	0.344651	0.04	0.009	7.468e-06	apical plate	WHL22.75242	Sp-Hypp_1379; Sp-Abcb9B; Sp-Abcb9A	ATP-binding cassette sub-family B member 9 (LOC100892777), transcript variant X1, mRNA	SPU_002237; SPU_002238; SPU_026825	NA	NA	NA
4.88617e-10	0.308209	0.133	0.058	7.61217e-06	apical plate	WHL22.376231	SPU_002890; Sp-Sapd	proactivator polypeptide (LOC754171), mRNA	SPU_002890; SPU_016273	lipid metabolic process	Saposin A-type domain; Saposin-like type B, region 1	Metabolism_LysosomalProtein
5.41258e-10	0.263527	0.035	0.007	8.43226e-06	apical plate	WHL22.499001	Sp-Plcb4; SPU_006363; Sp-Plcb4_3	1-phosphatidylinositol 4,5-bisphosphate phosphodiesterase beta-4 (LOC587412), transcript variant X5, mRNA	SPU_003669; SPU_006363; SPU_022715	lipid metabolic process; signal transduction; intracellular signal transduction; phosphatidylinositol phospholipase C activity; calcium ion binding; protein binding; phosphoric diester hydrolase activity	Phosphatidylinositol-specific phospholipase C, X domain; Phosphatidylinositol-specific phospholipase C, Y domain; PH domain	CalciumToolkit
5.47466e-10	0.271873	0.103	0.04	8.52897e-06	apical plate	WHL22.538533	Sp-Adrb2L_13	probable G-protein coupled receptor No18 (LOC579893), mRNA	SPU_021176	G-protein coupled receptor signaling pathway; G-protein coupled receptor activity; integral component of membrane	7 transmembrane receptor (rhodopsin family)	Nervous_Chemosensory
5.48402e-10	0.376816	0.088	0.032	8.54355e-06	apical plate	WHL22.359107	Sp-Slc16a6L_11	uncharacterized LOC592780 (LOC592780), mRNA	SPU_026850	transmembrane transport; integral component of membrane	Major Facilitator Superfamily	Metabolism_Carbohydrate
7.18728e-10	0.406537	0.289	0.17	1.11971e-05	apical plate	WHL22.357949	Sp-Rnpc2; SPU_020482	RNA-binding protein 39 (LOC762470), mRNA	SPU_011301; SPU_020482	nucleotide binding; nucleic acid binding	RNA recognition motif. (a.k.a. RRM, RBD, or RNP domain); linker between RRM2 and RRM3 domains in RBM39 protein	Unclassified
7.91031e-10	0.325535	0.128	0.055	1.23235e-05	apical plate	WHL22.120945	SPU_019198	spermatogenesis-associated serine-rich protein 1 (LOC754004), transcript variant X1, mRNA	SPU_019198	NA	Spermatogenesis-associated serine-rich protein 1	NA
8.50718e-10	0.271596	0.048	0.012	1.32533e-05	apical plate	WHL22.621576	Sp-Sentrin; SPU_017710	kelch-like protein 18 (LOC578471), transcript variant X1, mRNA	SPU_009867; SPU_017710	protein binding	Kelch motif; Kelch motif; Kelch motif	Unclassified
9.0165e-10	0.397	0.221	0.118	1.40468e-05	apical plate	WHL22.478197	Sp-Ddx5_17L	ATP-dependent RNA helicase dbp2 (LOC578813), mRNA	SPU_010343	nucleic acid binding; helicase activity; ATP binding; ATP-dependent helicase activity	DEAD/DEAH box helicase; Helicase conserved C-terminal domain; Type III restriction enzyme, res subunit	NucleicAcid_Helicase
1.03704e-09	0.280094	0.266	0.151	1.6156e-05	apical plate	WHL22.368425	Sp-Z62	NA	SPU_012914	GTP catabolic process; signal transduction; small GTPase mediated signal transduction; protein transport; nucleic acid binding; GTP binding; metal ion binding; intracellular; membrane	Ras family; C2H2-type zinc-finger domain; Ras of Complex, Roc, domain of DAPkinase	ZincFinger
1.21293e-09	0.295436	0.201	0.103	1.88963e-05	apical plate	WHL22.473097	Sp-Spec2ce1-3	spec2c protein (spec2c), mRNA	SPU_014607	calcium ion binding	EF hand; EF-hand domain pair; EF hand	Unclassified
1.3106e-09	0.265712	0.113	0.046	2.04178e-05	apical plate	WHL22.681316	Sp-Vps25; SPU_018435	vacuolar protein-sorting-associated protein 25 (LOC582335), mRNA	SPU_018434; SPU_018435	NA	ESCRT-II complex subunit	Unclassified
1.31474e-09	0.266592	0.06	0.018	2.04824e-05	apical plate	WHL22.466691	Sp-Hypp_682	uncharacterized LOC594793 (LOC594793), mRNA	SPU_012334	chromatin modification; zinc ion binding; nucleus	NA	NA
1.5353e-09	0.372837	0.153	0.072	2.39184e-05	apical plate	WHL22.555721	Sp-Gata2a	transcriptional repressor p66-beta (LOC578894), transcript variant X1, mRNA	SPU_007979	NA	Coiled-coil and interaction region of P66A and P66B with MBD2; GATA zinc finger	NA
1.66408e-09	0.299052	0.078	0.027	2.59247e-05	apical plate	WHL22.761466	SPU_018502; SPU_020574	polycystic kidney disease protein 2 (pkd2), mRNA	SPU_018502; SPU_020574	NA	NA	NA
1.68724e-09	0.428977	0.123	0.053	2.62856e-05	apical plate	WHL22.222014	SPU_023354; SPU_023355	spermatogenesis-associated protein 1 (LOC100893276), transcript variant X2, mRNA	SPU_023354; SPU_023355	NA	NA	NA
1.75461e-09	0.348806	0.128	0.056	2.73351e-05	apical plate	WHL22.483798	Sp-Klf2/4	Krueppel-like factor 5 (LOC576170), mRNA	SPU_020311	nucleic acid binding; metal ion binding	Zinc-finger double domain; Zinc finger, C2H2 type	ZincFinger
1.77752e-09	0.321261	0.063	0.02	2.7692e-05	apical plate	WHL22.437292	Sp-Hypp_208	uncharacterized LOC581149 (LOC581149), mRNA	SPU_023956	proteolysis; peptidase activity	Peptidase family M28	Metabolism_ProteinDegradation
1.94653e-09	0.303012	0.043	0.011	3.0325e-05	apical plate	WHL22.119644	Sp-Pip5k1a	phosphatidylinositol 4-phosphate 5-kinase type-1 beta (LOC579944), transcript variant X2, mRNA	SPU_005192	phosphatidylinositol metabolic process; phosphatidylinositol phosphate kinase activity	Phosphatidylinositol-4-phosphate 5-Kinase	NA
1.95369e-09	0.289584	0.168	0.082	3.04366e-05	apical plate	WHL22.227998	Sp-Xrra1L; SPU_002505; Sp-Xrra1L_1	X-ray radiation resistance-associated protein 1 (LOC584905), mRNA	SPU_001672; SPU_002505; SPU_020898	protein binding	Leucine rich repeat; Leucine Rich repeats (2 copies)	Unclassified
2.0431e-09	0.364701	0.249	0.139	3.18295e-05	apical plate	WHL22.711834	SPU_012407	stress-induced-phosphoprotein 1 (LOC586560), mRNA	SPU_012407	NA	DnaJ domain	Chaperone
2.2966e-09	0.25183	0.181	0.09	3.57787e-05	apical plate	WHL22.63747	Sp-Smc4; SPU_014706	structural maintenance of chromosomes protein 4 (LOC592992), mRNA	SPU_013617; SPU_014706	chromosome organization; protein binding; ATP binding; chromosome	RecF/RecN/SMC N terminal domain; SMC proteins Flexible Hinge Domain; AAA domain, putative AbiEii toxin, Type IV TA system	CellCycle
2.72827e-09	0.349214	0.314	0.188	4.25037e-05	apical plate	WHL22.143520	Sp-Btg4	maternal B9.15 protein-like (LOC587987), mRNA	SPU_019385	NA	BTG family	Transcription_Regulation
2.76913e-09	0.619896	0.053	0.015	4.31403e-05	apical plate	WHL22.429670	WHL22.429670	putative RNA polymerase II transcriptional coactivator (LOC754487), mRNA	NA	NA	NA	NA
2.82754e-09	0.283695	0.116	0.048	4.40502e-05	apical plate	WHL22.132608	WHL22.132608	uncharacterized LOC100892344 (LOC100892344), mRNA	NA	NA	NA	NA
3.00449e-09	0.425649	0.183	0.094	4.6807e-05	apical plate	WHL22.554715	Sp-Eif5B_1; Sp-Eif5bL; Sp-Tif2L	eukaryotic translation initiation factor 5B (LOC763128), mRNA	SPU_001393; SPU_003764; SPU_010757	NA	Ubiquitin fold modifier 1 protein; Translation-initiation factor 2; Elongation factor Tu domain 4	GTPase_Translational_Initiation
3.24978e-09	0.467333	0.126	0.057	5.06283e-05	apical plate	WHL22.58367	Sp-Cenpc1; Sp-Hypp_935	retinitis pigmentosa 1-like 1 protein (LOC589199), transcript variant X1, mRNA	SPU_003772; SPU_019315	kinetochore assembly; centromeric DNA binding; kinetochore	Mif2/CENP-C like; Cupin domain	NA
3.37404e-09	0.331095	0.158	0.076	5.25641e-05	apical plate	WHL22.114255	Sp-Rbm19	probable RNA-binding protein 19 (LOC754111), mRNA	SPU_001101	nucleotide binding; nucleic acid binding	RNA recognition motif. (a.k.a. RRM, RBD, or RNP domain)	Unclassified
3.43457e-09	0.314386	0.188	0.097	5.35071e-05	apical plate	WHL22.155370	Sp-C14orf45	basal body-orientation factor 1 (LOC578125), mRNA	SPU_010492	NA	Domain of unknown function (DUF4515)	NA
3.45086e-09	0.384686	0.188	0.097	5.3761e-05	apical plate	WHL22.561381	Sp-Nat11	N-alpha-acetyltransferase 40 (LOC577667), mRNA	SPU_006679	N-acetyltransferase activity	Acetyltransferase (GNAT) family; Cysteine-rich secretory protein family; Acetyltransferase (GNAT) domain	NA
3.56613e-09	0.412836	0.111	0.047	5.55567e-05	apical plate	WHL22.224487	Sp-Nek9	serine/threonine-protein kinase Nek9 (LOC575899), mRNA	SPU_007456	protein phosphorylation; protein kinase activity; protein serine/threonine kinase activity; ATP binding; transferase activity; transferring phosphorus-containing groups	Protein kinase domain; Regulator of chromosome condensation (RCC1) repeat; Protein tyrosine kinase	CellCycle
4.09596e-09	0.320961	0.204	0.108	6.3811e-05	apical plate	WHL22.160395	SPU_005821	twist-related protein 1 (LOC100890592), transcript variant X2, mRNA	SPU_005821	apoptotic process	NA	NA
4.99987e-09	0.276541	0.078	0.028	7.7893e-05	apical plate	WHL22.52254	Sp-Snf2; SPU_015994	helicase ARIP4 (LOC578074), mRNA	SPU_007773; SPU_015994	nucleic acid binding; DNA binding; helicase activity; ATP binding	SNF2 family N-terminal domain; Helicase conserved C-terminal domain; Type III restriction enzyme, res subunit	NucleicAcid_Helicase
5.50511e-09	0.365811	0.307	0.189	8.57642e-05	apical plate	WHL22.8481	Sp-Camk1	calcium/calmodulin-dependent protein kinase type 1D (LOC582789), partial mRNA	SPU_002105	protein phosphorylation; protein kinase activity; protein serine/threonine kinase activity; ATP binding; transferase activity; transferring phosphorus-containing groups	Protein kinase domain; Protein tyrosine kinase; Kinase-like	CalciumToolkit
6.25615e-09	0.332909	0.073	0.026	9.74646e-05	apical plate	WHL22.678744	Sp-Tmem57-2; Sp-Tmem57	macoilin (LOC592537), mRNA	SPU_019439; SPU_028461	integral component of membrane	Macoilin family	Transmembrane
6.47714e-09	0.257891	0.06	0.019	0.000100907	apical plate	WHL22.537618	Sp-Suz12	polycomb protein suz12-A (LOC583056), mRNA	SPU_013163	NA	VEFS-Box of polycomb protein	Unclassified
6.55802e-09	0.273115	0.118	0.052	0.000102167	apical plate	WHL22.126276	Sp-C14orf104L	protein kintoun (LOC585866), mRNA	SPU_007589	NA	PIH1 N-terminal domain; PIH1 CS-like domain	Unclassified
7.19979e-09	0.325022	0.291	0.176	0.000112166	apical plate	WHL22.416148	Sp-Spec2c; Sp-Spec2a	calcium-binding protein SPEC 2C (LOC100888959), mRNA	SPU_007449; SPU_026687	calcium ion binding	EF-hand domain pair; EF hand; EF-hand domain	Unclassified
9.18937e-09	0.287613	0.103	0.042	0.000143161	apical plate	WHL22.476701	Sp-Phlpb_2	phospholipase B1, membrane-associated (LOC578635), mRNA	SPU_022413	lipid metabolic process; hydrolase activity; hydrolase activity; acting on ester bonds	GDSL-like Lipase/Acylhydrolase; GDSL-like Lipase/Acylhydrolase family	Metabolism_Lipid
9.55475e-09	0.378426	0.219	0.122	0.000148853	apical plate	WHL22.32592	Sp-Hypp_1369	protein FAM228B (LOC582953), mRNA	SPU_002097	NA	NA	NA
9.72004e-09	0.264562	0.048	0.013	0.000151428	apical plate	WHL22.279708	Sp-CycE	G1/S-specific cyclin-E (LOC579860), mRNA	SPU_001712	regulation of cyclin-dependent protein serine/threoninekinase activity; regulation of cell cycle; protein kinase binding; nucleus	Cyclin, N-terminal domain; Cyclin, C-terminal domain	CellCycle
9.77736e-09	0.274012	0.106	0.044	0.000152321	apical plate	WHL22.21342	Sp-Tcf25	transcription factor 25 (LOC579207), mRNA	SPU_015723	NA	Transcriptional repressor TCF25	Homolog-of-gene-with-unknown-function
1.15093e-08	0.321745	0.216	0.12	0.000179303	apical plate	WHL22.483879	SPU_015692	testis, prostate and placenta-expressed protein (LOC577525), mRNA	SPU_015692	NA	NA	NA
1.16794e-08	0.400953	0.121	0.054	0.000181953	apical plate	WHL22.167441	Sp-Lrrc6; SPU_020729	protein tilB homolog (LOC586953), transcript variant X1, mRNA	SPU_006302; SPU_020729	protein binding	Leucine-rich repeat; Leucine Rich repeats (2 copies); Leucine rich repeat	NA
1.28962e-08	0.266451	0.161	0.08	0.00020091	apical plate	WHL22.521559	SPU_005034	calmodulin-2/4 (LOC585042), mRNA	SPU_005034	calcium ion binding	EF-hand domain pair; EF hand; EF-hand domain	Unclassified
1.31606e-08	0.301206	0.141	0.067	0.000205028	apical plate	WHL22.727194	SPU_013224; Sp-Hmmr	hyaluronan receptor-like (LOC580085), transcript variant X1, mRNA	SPU_013224; SPU_013686	hyaluronic acid binding	Hyaluronan mediated motility receptor N-terminal	NA
1.32604e-08	0.263509	0.07	0.025	0.000206583	apical plate	WHL22.316579	Sp-Aff3; Sp-Hypp_2533	AF4/FMR2 family member 3 (LOC579182), mRNA	SPU_004351; SPU_021048	NA	AF-4 proto-oncoprotein	ViralProtein
1.37341e-08	0.294709	0.166	0.083	0.000213963	apical plate	WHL22.206501	Sp-Imp_2; Sp-Imp_1	importin subunit alpha-7 (LOC579689), transcript variant X2, mRNA	SPU_013477; SPU_018173	binding; protein binding	Armadillo/beta-catenin-like repeat; HEAT-like repeat; Atypical Arm repeat	Unclassified
1.43054e-08	0.363294	0.5	0.389	0.000222864	apical plate	WHL22.475090	SPU_010342	uncharacterized LOC589921 (LOC589921), transcript variant X3, mRNA	SPU_010342	NA	NA	NA
1.4429e-08	0.372031	0.103	0.044	0.00022479	apical plate	WHL22.684862	Sp-Slka; Sp-Stk10; SPU_023582	serine/threonine-protein kinase 10 (LOC588762), mRNA	SPU_014726; SPU_020190; SPU_023582	protein phosphorylation; protein kinase activity; ATP binding; transferase activity; transferring phosphorus-containing groups	Protein kinase domain; Protein tyrosine kinase	Kinase_STE
1.54968e-08	0.264276	0.163	0.082	0.000241425	apical plate	WHL22.99855	SPU_006476; Sp-Ergic3	endoplasmic reticulum-Golgi intermediate compartment protein 3 (LOC587222), mRNA	SPU_006476; SPU_006478	NA	NA	NA
1.55426e-08	0.352463	0.256	0.154	0.000242138	apical plate	WHL22.150097	Sp-Rtf1	RNA polymerase-associated protein RTF1 homolog (LOC581769), mRNA	SPU_025726	DNA-templated transcription; initiation; histone modification; DNA binding; nucleus	Plus-3 domain	Unclassified
1.63166e-08	0.311261	0.128	0.059	0.000254197	apical plate	WHL22.69418	Sp-Hypp_1023	putative uncharacterized protein DDB_G0271606 (LOC594083), mRNA	SPU_021413	NA	NA	NA
2.11068e-08	0.316688	0.229	0.13	0.000328822	apical plate	WHL22.224810	Sp-Prpf39	pre-mRNA-processing factor 39 (LOC588692), mRNA	SPU_027020	RNA processing; protein binding; intracellular	Tetratricopeptide repeat; Tetratricopeptide repeat	NucleicAcid_RNA-Processing
2.39796e-08	0.374567	0.055	0.018	0.000373578	apical plate	WHL22.55116	Sp-Gphn; Sp-Gephph	gephyrin (LOC764940), mRNA	SPU_017876; SPU_017877	Mo-molybdopterin cofactor biosynthetic process	Probable molybdopterin binding domain	NA
2.41703e-08	0.36282	0.284	0.174	0.000376549	apical plate	WHL22.736391	SPU_002378	uncharacterized LOC578796 (LOC578796), mRNA	SPU_002378	NA	NA	NA
2.5464e-08	0.257891	0.055	0.017	0.000396704	apical plate	WHL22.662909	Sp-Clip170ph	centrosome-associated protein 350 (LOC577510), transcript variant X1, mRNA	SPU_018326	microtubule anchoring; protein binding; microtubule binding; centrosome	CAP-Gly domain	NA
2.6061e-08	0.281511	0.188	0.1	0.000406004	apical plate	WHL22.84068	SPU_021560	protein HEXIM-like (LOC587630), mRNA	SPU_021560	negative regulation of transcription from RNA polymerase IIpromoter; cyclin-dependent protein serine/threonine kinase inhibitoractivity; snRNA binding; nucleus; cytoplasm	Hexamethylene bis-acetamide-inducible protein	NA
2.97819e-08	0.343235	0.095	0.04	0.000463972	apical plate	WHL22.359029	SPU_019363; Sp-Ddx46	probable ATP-dependent RNA helicase DDX46 (LOC579710), mRNA	SPU_019363; SPU_021088	NA	NA	NA
3.00779e-08	0.304079	0.216	0.121	0.000468584	apical plate	WHL22.307289	WHL22.307289	guanine nucleotide-binding protein G(q) alpha subunit (gnaq), mRNA	NA	NA	NA	NA
3.64382e-08	0.257703	0.07	0.025	0.00056767	apical plate	WHL22.678132	Sp-Slc44a2_1; Sp-Slc44a2_2	choline transporter-like protein 2 (LOC588147), mRNA	SPU_014341; SPU_015348	NA	Plasma-membrane choline transporter	Homolog-of-gene-with-unknown-function
3.78382e-08	0.27051	0.106	0.046	0.000589482	apical plate	WHL22.509140	Sp-Tsc22d2	protein bunched, class 2/F/G isoform (LOC589987), transcript variant X2, mRNA	SPU_022435	regulation of transcription; DNA-templated; sequence-specific DNA binding transcription factor activity	TSC-22/dip/bun family	Unclassified
3.91589e-08	0.308082	0.171	0.089	0.000610056	apical plate	WHL22.699183	Sp-Hypp_1626; Sp-Hypp_1813	uncharacterized LOC582157 (LOC582157), transcript variant X1, mRNA	SPU_006032; SPU_008920	regulation of transcription; DNA-templated; sequence-specific DNA binding transcription factor activity; sequence-specific DNA binding	Basic region leucine zipper	Transcription_Regulation
4.16229e-08	0.267379	0.063	0.022	0.000648443	apical plate	WHL22.739581	Sp-Nkx2.1	homeodomain protein NK2.1 (NK2.1), transcript variant X1, mRNA	SPU_000757	regulation of transcription; DNA-templated; DNA binding; sequence-specific DNA binding transcription factoractivity; sequence-specific DNA binding; nucleus	Homeodomain	Nervous_TF
4.2387e-08	0.268582	0.113	0.05	0.000660347	apical plate	WHL22.678822	SPU_001002; Sp-Ccdc60L	coiled-coil domain-containing protein 60 (LOC764890), transcript variant X3, mRNA	SPU_001002; SPU_019035	NA	Domain of unknown function (DUF4698)	NA
4.38852e-08	0.392341	0.209	0.118	0.000683688	apical plate	WHL22.147711	Sp-Mier3	mesoderm induction early response protein 1 (LOC574677), transcript variant X2, mRNA	SPU_014774	NA	ELM2 domain	Unclassified
4.56982e-08	0.395034	0.098	0.042	0.000711932	apical plate	WHL22.77594	Sp-Ccdc49; Sp-Ccdc49	pre-mRNA-splicing factor CWC25 homolog (LOC577351), transcript variant X2, mRNA	SPU_001204; SPU_010632	NA	Pre-mRNA splicing factor; N-terminal domain of CBF1 interacting co-repressor CIR	Unclassified
4.57283e-08	0.260259	0.065	0.023	0.000712401	apical plate	WHL22.296613	Sp-Z131	uncharacterized LOC580133 (LOC580133), mRNA	SPU_003490	nucleic acid binding; DNA binding; metal ion binding	Zinc finger, C2H2 type; C2H2-type zinc finger; Zinc-finger double-stranded RNA-binding	ZincFinger
4.68614e-08	0.410115	0.44	0.327	0.000730054	apical plate	WHL22.80541	Sp-Mad	max-interacting protein 1 (LOC577815), transcript variant X1, mRNA	SPU_006583	protein dimerization activity	Helix-loop-helix DNA-binding domain	TranscriptionFactor_bHLH
4.75739e-08	0.301332	0.224	0.128	0.000741154	apical plate	WHL22.300767	Sp-Zmynd8	protein kinase C-binding protein 1 (LOC581151), transcript variant X1, mRNA	SPU_001742	protein binding	Bromodomain	Kinase_AGC
4.78954e-08	0.264455	0.063	0.022	0.000746162	apical plate	WHL22.333748	Sp-Trip12; Sp-Trip12	E3 ubiquitin-protein ligase TRIP12 (LOC578329), transcript variant X1, mRNA	SPU_002508; SPU_003857	NA	NA	NA
5.04544e-08	0.427815	0.151	0.076	0.000786029	apical plate	WHL22.296748	Sp-Efhc2_1	EF-hand domain-containing family member C2 (LOC593993), mRNA	SPU_009896	calcium ion binding	DUF1126 PH-like domain; EF-hand domain pair	Homolog-of-gene-with-unknown-function
5.06244e-08	0.363145	0.113	0.051	0.000788677	apical plate	WHL22.728221	Sp-Spec2d	spec2d protein (spec2d), mRNA	SPU_003175	calcium ion binding	EF-hand domain; EF hand; EF-hand domain pair	Unclassified
5.35313e-08	0.353023	0.08	0.032	0.000833964	apical plate	WHL22.437832	Sp-Kiaa1751L	cilia- and flagella-associated protein 74 (LOC585248), mRNA	SPU_002562	NA	NA	NA
5.52196e-08	0.296118	0.244	0.142	0.000860265	apical plate	WHL22.286275	Sp-C19orf2	tumor protein p53-inducible nuclear protein 2 (LOC579670), mRNA	SPU_001722	protein folding; unfolded protein binding; prefoldin complex	DOR family; Prefoldin subunit; Prefoldin subunit	Chaperone
5.72925e-08	0.251998	0.06	0.02	0.00089256	apical plate	WHL22.494228	Sp-Rnf41L	RING finger protein 151 (LOC576742), transcript variant X1, mRNA	SPU_005764	protein ubiquitination; ubiquitin-protein ligase activity; protein binding; zinc ion binding	Zinc finger, C3HC4 type (RING finger); RING-type zinc-finger; Zinc finger, C3HC4 type (RING finger)	NA
5.80592e-08	0.376575	0.289	0.18	0.000904504	apical plate	WHL22.181380	Sp-Uxs1_1; SPU_019702	UDP-glucuronic acid decarboxylase 1 (LOC753648), mRNA	SPU_013637; SPU_019702	cellular metabolic process; catalytic activity; coenzyme binding	GDP-mannose 4,6 dehydratase; NAD dependent epimerase/dehydratase family	Isomerase
6.54208e-08	0.258897	0.065	0.023	0.00101919	apical plate	WHL22.481618	SPU_008357	collagen triple helix repeat-containing protein 1 (LOC756019), transcript variant X1, mRNA	SPU_008357	NA	NA	NA
7.04272e-08	0.289422	0.028	0.006	0.00109718	apical plate	WHL22.566065	Sp-Lrch3	leucine-rich repeat and calponin homology domain-containing protein 2 (LOC575134), transcript variant X4, mRNA	SPU_007395	protein binding	Calponin homology (CH) domain	NA
7.50905e-08	0.322359	0.123	0.058	0.00116984	apical plate	WHL22.639339	WHL22.639339	glutamic acid-rich protein-like (LOC581543), transcript variant X4, mRNA	NA	NA	NA	NA
7.56377e-08	0.270236	0.133	0.064	0.00117836	apical plate	WHL22.476604	Sp-Helz	probable helicase with zinc finger domain (LOC575216), mRNA	SPU_022710	NA	AAA domain; AAA domain; AAA domain	Unclassified
8.12713e-08	0.25438	0.193	0.105	0.00126613	apical plate	WHL22.28828	Sp-Ap4; Sp-Tcfap4L	transcription factor AP-4 (LOC578637), mRNA	SPU_003179; SPU_007723	protein dimerization activity	Helix-loop-helix DNA-binding domain	TranscriptionFactor_bHLH
9.10876e-08	0.262912	0.118	0.055	0.00141905	apical plate	WHL22.436291	SPU_024580; SPU_024581	uncharacterized protein C1orf198 homolog (LOC593185), transcript variant X2, mRNA	SPU_024580; SPU_024581	NA	Domain of unknown function (DUF4706)	NA
9.96156e-08	0.272708	0.111	0.05	0.00155191	apical plate	WHL22.159299	Sp-Cnot3; Sp-Cnot3_1	CCR4-NOT transcription complex subunit 3 (LOC577531), transcript variant X2, mRNA	SPU_007613; SPU_011129	regulation of transcription; DNA-templated; nucleus	Not1 N-terminal domain, CCR4-Not complex component; NOT2 / NOT3 / NOT5 family	Transcription_Regulation
1.07183e-07	0.304395	0.108	0.049	0.0016698	apical plate	WHL22.27150	Sp-Fusip1	serine/arginine-rich splicing factor 10 (LOC586800), mRNA	SPU_006900	nucleotide binding; nucleic acid binding	RNA recognition motif. (a.k.a. RRM, RBD, or RNP domain)	Unclassified
1.09933e-07	0.382631	0.065	0.024	0.00171264	apical plate	WHL22.164432	Sp-Zcchc11	uncharacterized LOC763123 (LOC763123), transcript variant X1, mRNA	SPU_018666	nucleic acid binding; zinc ion binding	Cid1 family poly A polymerase; Zinc knuckle	mRNA_Modifier
1.29831e-07	0.266555	0.251	0.15	0.00202264	apical plate	WHL22.70457	Sp-glysynk3b; Sp-Gsk; Sp-Gsk3	glycogen synthase kinase-3 beta (LOC764638), mRNA	SPU_009263; SPU_012832; SPU_027914	protein phosphorylation; protein kinase activity; protein serine/threonine kinase activity; ATP binding; transferase activity; transferring phosphorus-containing groups	Protein kinase domain; Protein tyrosine kinase	Fertilization
1.32276e-07	0.392735	0.206	0.118	0.00206072	apical plate	WHL22.565073	Sp-Baz1a	bromodomain adjacent to zinc finger domain protein 1A (LOC577837), transcript variant X3, mRNA	SPU_006840	protein binding; zinc ion binding	ATP-utilising chromatin assembly and remodelling N-terminal; PHD-finger; Bromodomain	NA
1.44972e-07	0.275931	0.053	0.017	0.00225851	apical plate	WHL22.695589	Sp-Hypp_1410; Sp-Hypp_239	arginine/serine-rich protein PNISR (LOC594594), mRNA	SPU_002726; SPU_026053	NA	Arginine/serine-rich protein PNISR	NA
1.46199e-07	0.253458	0.239	0.141	0.00227763	apical plate	WHL22.252879	WHL22.252879	severin (LOC753847), transcript variant X1, mRNA	NA	NA	NA	NA
1.48228e-07	0.283979	0.118	0.056	0.00230924	apical plate	WHL22.668572	WHL22.668572	PAX-interacting protein 1 (LOC580489), mRNA	NA	NA	NA	NA
1.50099e-07	0.264616	0.045	0.014	0.0023384	apical plate	WHL22.406705	Sp-Dnahc8L_1	dynein heavy chain 8, axonemal (LOC755874), mRNA	SPU_024596	microtubule-based movement; microtubule motor activity; dynein complex	Dynein heavy chain C-terminal domain	NA
1.74155e-07	0.263596	0.123	0.059	0.00271316	apical plate	WHL22.590707	Sp-Pard6b	partitioning defective 6 homolog beta-like (LOC587966), mRNA	SPU_003986	protein binding	PDZ domain; PB1 domain; PDZ domain	NA
1.80949e-07	0.306411	0.151	0.078	0.002819	apical plate	WHL22.754708	Sp-Alox5_9	arachidonate 12-lipoxygenase, 12R-type (LOC579368), mRNA	SPU_023430	oxidation-reduction process; oxidoreductase activity; acting on single donors withincorporation of molecular oxygen; incorporation of two atoms of oxygen; metal ion binding	Lipoxygenase	Oxygenase
1.84272e-07	0.29102	0.045	0.014	0.00287078	apical plate	WHL22.520609	WHL22.520609	pecanex-like protein 1 (LOC579498), mRNA	NA	NA	NA	NA
1.91519e-07	0.310844	0.193	0.108	0.00298367	apical plate	WHL22.376050	SPU_019958	coiled-coil domain-containing protein 153 (LOC100892368), mRNA	SPU_019958	NA	NA	NA
1.97057e-07	0.272578	0.08	0.032	0.00306995	apical plate	WHL22.651595	WHL22.651595	cytochrome P450 10 (LOC576441), transcript variant X1, mRNA	NA	NA	NA	NA
2.02012e-07	0.321578	0.055	0.019	0.00314715	apical plate	WHL22.150223	Sp-C6orf97L	coiled-coil domain-containing protein 170 (LOC593727), mRNA	SPU_024086	NA	NA	NA
2.16368e-07	0.280554	0.053	0.018	0.0033708	apical plate	WHL22.106756	Sp-Acel_4	angiotensin-converting enzyme (LOC593528), transcript variant X1, mRNA	SPU_021351	proteolysis; metallopeptidase activity; peptidyl-dipeptidase activity; membrane	Angiotensin-converting enzyme	Metabolism_AminoAcid
2.19366e-07	0.36781	0.294	0.19	0.00341751	apical plate	WHL22.393136	Sp-Hypp_387; Sp-Hypp_1460	histone-lysine N-methyltransferase SETD1B (LOC591398), transcript variant X4, mRNA	SPU_003522; SPU_003523	NA	NA	NA
2.8188e-07	0.258934	0.068	0.026	0.00439141	apical plate	WHL22.6662	SPU_026983	probable serine incorporator (LOC755589), mRNA	SPU_026983	NA	NA	NA
3.52263e-07	0.342819	0.296	0.194	0.0054879	apical plate	WHL22.581477	Sp-Cwc22	pre-mRNA-splicing factor CWC22 homolog (LOC576841), mRNA	SPU_010596	RNA binding; binding; protein binding	MA3 domain	NA
3.59402e-07	0.276906	0.186	0.103	0.00559912	apical plate	WHL22.728214	Sp-Ddm36L	protogenin B (LOC763790), mRNA	SPU_004328	protein binding	Fibronectin type III domain; Immunoglobulin domain; Immunoglobulin I-set domain	Adhesion_IgFN3Receptor
4.13743e-07	0.267984	0.128	0.064	0.0064457	apical plate	WHL22.694686	Sp-Mphosph8	M-phase phosphoprotein 8-like (LOC105436821), mRNA	SPU_021723	protein binding	Ankyrin repeats (3 copies); Ankyrin repeat; Ankyrin repeats (many copies)	Unclassified
5.13478e-07	0.743865	0.02	0.004	0.00799948	apical plate	WHL22.461412	Sp-Hypp_1329; Sp-Hypp_137; Sp-Hgf; Sp-Hypp_950	uncharacterized protein F54H12.2-like (LOC583562), mRNA	SPU_001448; SPU_017648; SPU_017649; SPU_019851	DNA replication; mismatch repair; nucleotide binding; nucleic acid binding; DNA binding; DNA-directed DNA polymerase activity; endonuclease activity; 3'-5' exonuclease activity	DNA polymerase type B, organellar and viral	DNA_Replication
5.72162e-07	0.251231	0.058	0.021	0.00891371	apical plate	WHL22.248712	Sp-Hypp_1545	uncharacterized LOC100892394 (LOC100892394), mRNA	SPU_004819	NA	NA	NA
5.86327e-07	0.255251	0.286	0.182	0.00913439	apical plate	WHL22.523709	Sp-Pacrg	parkin coregulated gene protein homolog (LOC586307), mRNA	SPU_004619	binding	Parkin co-regulated protein	Chaperone
6.69418e-07	0.263584	0.055	0.02	0.0104289	apical plate	WHL22.613803	Sp-Hypp_2099	uncharacterized LOC592090 (LOC592090), mRNA	SPU_013713	NA	NA	NA
6.7784e-07	0.259334	0.229	0.137	0.0105601	apical plate	WHL22.343742	Sp-C2orf77L	coiled-coil domain-containing protein 173 (LOC582259), mRNA	SPU_004882	NA	Trichohyalin-plectin-homology domain	NA
7.36523e-07	0.269225	0.053	0.018	0.0114743	apical plate	WHL22.584609	Sp-Hypp_3013	uncharacterized LOC100891487 (LOC100891487), mRNA	SPU_006344	NA	NA	NA
7.56131e-07	0.315775	0.425	0.315	0.0117798	apical plate	WHL22.686696	Sp-Rad23	UV excision repair protein RAD23 homolog A (LOC578143), mRNA	SPU_008905	nucleotide-excision repair; proteasome-mediated ubiquitin-dependent proteincatabolic process; damaged DNA binding; protein binding; nucleus	UBA/TS-N domain; Ubiquitin family; XPC-binding domain	NA
1.19324e-06	0.267074	0.108	0.052	0.0185895	apical plate	WHL22.78158	Sp-Mst	serine/threonine-protein kinase 4 (LOC576378), transcript variant X5, mRNA	SPU_003403	protein phosphorylation; signal transduction; protein kinase activity; protein serine/threonine kinase activity; ATP binding; transferase activity; transferring phosphorus-containing groups	Protein kinase domain; Protein tyrosine kinase; C terminal SARAH domain of Mst1	Kinase_STE
1.34584e-06	0.252507	0.068	0.027	0.0209669	apical plate	WHL22.647633	Sp-Nacha2_1	neuronal acetylcholine receptor subunit alpha-3 (LOC581710), transcript variant X1, mRNA	SPU_001774	transport; ion transport; acetylcholine-activated cation-selective channel activity; ion channel activity; extracellular ligand-gated ion channel activity; membrane; integral component of membrane; postsynaptic membrane	Neurotransmitter-gated ion-channel transmembrane region; Neurotransmitter-gated ion-channel ligand binding domain	CalciumToolkit
1.61983e-06	0.29134	0.058	0.022	0.0252353	apical plate	WHL22.659641	Sp-Pnn	pinin (LOC580354), mRNA	SPU_007180	NA	pinin/SDK/memA/ protein conserved region; pinin/SDK conserved region	Unclassified
1.64313e-06	0.32869	0.095	0.044	0.0255983	apical plate	WHL22.647310	Sp-Nckx_1	sodium/potassium/calcium exchanger 3 (LOC100888839), partial mRNA	SPU_009526	transmembrane transport; integral component of membrane	Sodium/calcium exchanger protein	CalciumToolkit
1.64546e-06	0.253049	0.138	0.073	0.0256346	apical plate	WHL22.451139	SPU_021384	uncharacterized LOC584768 (LOC584768), mRNA	SPU_021384	protein binding	NA	ExtracellularMatrix
1.75565e-06	0.288707	0.176	0.101	0.0273512	apical plate	WHL22.281926	Sp-C1orf9L	SUN domain-containing ossification factor (LOC754542), mRNA	SPU_004147	NA	Sad1 / UNC-like C-terminal	Unclassified
1.91516e-06	0.343595	0.128	0.067	0.0298363	apical plate	WHL22.393089	Sp-Cdc2l1; Sp-Cdc2l1_1	cyclin-dependent kinase 11B (LOC764563), mRNA	SPU_016748; SPU_017385	protein phosphorylation; protein kinase activity; protein serine/threonine kinase activity; ATP binding; transferase activity; transferring phosphorus-containing groups	Protein kinase domain; Protein tyrosine kinase; Kinase-like	CellCycle
2.01349e-06	0.351564	0.07	0.029	0.0313682	apical plate	WHL22.62263	WHL22.62263	uncharacterized LOC100889825 (LOC100889825), transcript variant X1, mRNA	NA	NA	NA	NA
2.13873e-06	0.294191	0.111	0.055	0.0333193	apical plate	WHL22.20935	Sp-LyarL	E3 ubiquitin-protein ligase RBBP6 (LOC575094), mRNA	SPU_020998	NA	LYAR-type C2HC zinc finger	NA
2.24764e-06	0.289732	0.053	0.019	0.0350161	apical plate	WHL22.121654	Sp-Six3	homeobox protein SIX6-like (LOC576281), mRNA	SPU_018908	regulation of transcription; DNA-templated; DNA binding; sequence-specific DNA binding transcription factoractivity; sequence-specific DNA binding	Transcriptional regulator, SIX1, N-terminal SD domain; Homeodomain; Homeobox KN domain	Nervous_Retinal
2.35615e-06	0.270403	0.085	0.038	0.0367065	apical plate	WHL22.459693	Sp-Sld5	DNA replication complex GINS protein SLD5 (LOC574880), mRNA	SPU_012376	NA	DNA replication complex GINS protein SLD5 C-terminus; GINS complex protein	DNA_Replication
2.61323e-06	0.271531	0.166	0.094	0.0407115	apical plate	WHL22.520264	SPU_006743	uncharacterized protein C1orf131 homolog (LOC590346), mRNA	SPU_006743	NA	Domain of unknown function (DUF4602)	NA
2.84061e-06	0.284517	0.033	0.009	0.0442539	apical plate	WHL22.131957	Sp-Ppglcp	uncharacterized LOC586467 (LOC586467), mRNA	SPU_017527	NA	Haloacid dehalogenase-like hydrolase; haloacid dehalogenase-like hydrolase; HAD-hyrolase-like	Hydrolase
3.71555e-06	0.251662	0.073	0.031	0.0578845	apical plate	WHL22.123675	SPU_018910	receptor for egg jelly protein (REJ9), mRNA	SPU_018910	neuropeptide signaling pathway; protein binding; membrane	REJ domain; Ankyrin repeats (many copies); Ankyrin repeats (3 copies)	NA
4.20509e-06	0.340802	0.053	0.02	0.0655111	apical plate	WHL22.614261	WHL22.614261	dyslexia susceptibility 1 candidate gene 1 protein homolog (LOC582679), mRNA	NA	NA	NA	NA
4.29048e-06	0.264759	0.078	0.035	0.0668415	apical plate	WHL22.584483	Sp-Nasp	nuclear histone binding protein (LOC373260), mRNA	SPU_012393	protein binding	SHNi-TPR	Unclassified
4.55882e-06	0.252742	0.148	0.083	0.0710219	apical plate	WHL22.120873	Sp-Tcp2; SPU_005194	C3 and PZP-like alpha-2-macroglobulin domain-containing protein 8 (LOC579831), mRNA	SPU_005193; SPU_005194	endopeptidase inhibitor activity; protein binding; extracellular region; extracellular space	A-macroglobulin TED domain; Alpha-2-macroglobulin bait region domain; Alpha-2-macroglobulin family	ImmuneSystem_Effector_Complement
4.64897e-06	0.303352	0.214	0.134	0.0724263	apical plate	WHL22.51605	Sp-Cyhr1	cysteine and histidine-rich protein 1 (LOC579546), mRNA	SPU_020505	protein ubiquitination; ubiquitin-protein ligase activity; protein binding; zinc ion binding	Zinc finger, C3HC4 type (RING finger); Seven in absentia protein family	NA
4.99457e-06	0.276946	0.065	0.027	0.0778105	apical plate	WHL22.86772	Sp-Hypp_35	IQ motif and SEC7 domain-containing protein 3 (LOC579581), mRNA	SPU_008687	regulation of ARF protein signal transduction; ARF guanyl-nucleotide exchange factor activity; protein binding	Sec7 domain	Transport_Translocon
5.38602e-06	0.265447	0.043	0.015	0.0839088	apical plate	WHL22.27619	Sp-Hypp_7719	uncharacterized LOC576541 (LOC576541), mRNA	SPU_024647	NA	NA	NA
5.67193e-06	0.263143	0.075	0.034	0.0883629	apical plate	WHL22.377071	SPU_011084; Sp-Cpsf_100kDa; SPU_012052	cleavage and polyadenylation specificity factor subunit 2 (LOC582050), mRNA	SPU_011084; SPU_012051; SPU_012052	NA	Cleavage and polyadenylation factor 2 C-terminal	NA
6.26454e-06	0.301761	0.03	0.009	0.0975953	apical plate	WHL22.438771	Sp-Unvn	univin (LOC373488), mRNA	SPU_000668	growth; growth factor activity	Transforming growth factor beta like domain; TGF-beta propeptide	Signaling_TGFB_Ligand
7.07972e-06	0.301932	0.078	0.035	0.110295	apical plate	WHL22.313783	WHL22.313783	cat eye syndrome critical region protein 2 (LOC592188), mRNA	NA	NA	NA	NA
7.2643e-06	0.339074	0.08	0.037	0.113171	apical plate	WHL22.132295	Sp-Gtf2F1; SPU_019890	general transcription factor IIF subunit 1 (LOC764361), mRNA	SPU_016139; SPU_019890	transcription initiation from RNA polymerase II promoter; positive regulation of transcription; DNA-templated; DNA binding; catalytic activity; nucleus	Transcription initiation factor IIF, alpha subunit (TFIIF-alpha)	Transcription_Initiation
7.29094e-06	0.363912	0.485	0.416	0.113585	apical plate	WHL22.417635	Sp-Spec1	Spec 1a protein (SPEC1), mRNA	SPU_007452	calcium ion binding	EF hand; EF-hand domain pair; EF-hand domain	Unclassified
7.30425e-06	0.272005	0.181	0.108	0.113793	apical plate	WHL22.529774	SPU_015068; Sp-Ccdc6	coiled-coil domain-containing protein 6 (LOC588905), mRNA	SPU_015068; SPU_024510	NA	Uncharacterized conserved protein H4 (DUF2046)	Homolog-of-gene-with-unknown-function
7.74529e-06	0.322223	0.264	0.175	0.120664	apical plate	WHL22.752274	Sp-Hypp_1234	uncharacterized LOC585395 (LOC585395), mRNA	SPU_028577	protein binding; zinc ion binding; metal ion binding; intracellular	RING-type zinc-finger; Zinc finger, C3HC4 type (RING finger); B-box zinc finger	NA
8.12749e-06	0.265398	0.053	0.02	0.126618	apical plate	WHL22.362787	WHL22.362787	trichohyalin (LOC756802), mRNA	NA	NA	NA	NA
8.86419e-06	0.258951	0.286	0.193	0.138095	apical plate	WHL22.104606	Sp-Soxb1	transcription factor SoxB1 (SoxB1), mRNA	SPU_022820	NA	HMG (high mobility group) box; SOX transcription factor; HMG-box domain	Nervous_TF
9.61708e-06	0.271462	0.073	0.033	0.149825	apical plate	WHL22.55172	Sp-Cebpz	CCAAT/enhancer-binding protein zeta (LOC580482), mRNA	SPU_012087	binding	CBF/Mak21 family; Adaptin N terminal region; non-SMC mitotic condensation complex subunit 1	Transcription_Regulation
9.65606e-06	0.305949	0.033	0.01	0.150432	apical plate	WHL22.369533	Sp-Xpc	DNA repair protein complementing XP-C cells homolog (LOC581218), mRNA	SPU_028774	nucleotide-excision repair; DNA binding; damaged DNA binding; nucleus	Rad4 beta-hairpin domain 3; Rad4 transglutaminase-like domain; Rad4 beta-hairpin domain 1	NucleicAcid_Binding
1.01245e-05	0.297742	0.078	0.036	0.15773	apical plate	WHL22.8655	Sp-Hypp_527	RNA-binding protein 25 (LOC581159), transcript variant X1, mRNA	SPU_007813	NA	NA	NA
1.23409e-05	0.31092	0.078	0.036	0.192259	apical plate	WHL22.663074	Sp-Agpat1_2	1-acyl-sn-glycerol-3-phosphate acyltransferase alpha (LOC592014), mRNA	SPU_022652	metabolic process; transferase activity; transferring acyl groups	Acyltransferase	Metabolism_Lipid
1.27378e-05	0.30082	0.035	0.011	0.198443	apical plate	WHL22.25641	Sp-Tm9sf4	transmembrane 9 superfamily member 4 (LOC587169), mRNA	SPU_017547	integral component of membrane	Endomembrane protein 70	Unclassified
1.2971e-05	0.278153	0.374	0.274	0.202075	apical plate	WHL22.519961	Sp-Mnk2; Sp-Mnk	Mnk1 protein (LOC575733), transcript variant X1, mRNA	SPU_002418; SPU_006947	protein phosphorylation; protein kinase activity; protein serine/threonine kinase activity; ATP binding; transferase activity; transferring phosphorus-containing groups	Protein kinase domain; Protein tyrosine kinase	Kinase_CMGC
1.53547e-05	0.263187	0.178	0.108	0.23921	apical plate	WHL22.335959	SPU_017412; Sp-Larp1	la-related protein 1B (LOC575659), mRNA	SPU_017412; SPU_017413	NA	NA	NA
2.18729e-05	0.353483	0.04	0.014	0.340758	apical plate	WHL22.605259	Sp-Erf1	eukaryotic peptide chain release factor subunit 1 (LOC591483), mRNA	SPU_023948	translational termination; translation release factor activity; codon specific; cytoplasm	eRF1 domain 2; eRF1 domain 3; eRF1 domain 1	Translation_Factor
2.76869e-05	0.310079	0.073	0.034	0.431334	apical plate	WHL22.509886	Sp-Hypp_332	leucine-rich repeat-containing protein 16A (LOC578892), mRNA	SPU_001358	NA	NA	NA
3.28155e-05	0.278898	0.178	0.109	0.511232	apical plate	WHL22.128681	Sp-Bstrnph; Sp-Spnb2; Sp-Sptbn	spectrin beta chain, non-erythrocytic 1 (LOC584503), transcript variant X3, mRNA	SPU_007720; SPU_014441; SPU_023554	actin binding; structural constituent of cytoskeleton; protein binding; phospholipid binding; spectrin	Spectrin repeat; Calponin homology (CH) domain; Pleckstrin homology domain	Cytoskeleton_ActinBinding
3.43053e-05	0.381552	0.05	0.02	0.534442	apical plate	WHL22.81775	Sp-Hypp_1484; Sp-Hypp_491; Sp-Kiaa1875L	WD repeat-containing protein KIAA1875 (LOC581299), transcript variant X10, mRNA	SPU_003817; SPU_006716; SPU_008657	NA	NA	NA
3.47898e-05	0.250875	0.191	0.12	0.541991	apical plate	WHL22.502540	Sp-Slc29a1	microtubule-associated protein 10 (LOC100888354), mRNA	SPU_028310	transport; nucleoside transmembrane transporter activity; integral component of membrane	Nucleoside transporter	Metabolism_Nucleotide
4.08364e-05	0.332182	0.09	0.047	0.63619	apical plate	WHL22.658177	Sp-Apba1; SPU_008420; SPU_027063; Sp-Apba1_1	protein lin-10 (LOC574607), mRNA	SPU_008419; SPU_008420; SPU_027063; SPU_027064	protein binding	Phosphotyrosine interaction domain (PTB/PID)	Unclassified
7.05728e-05	0.260486	0.138	0.082	1	apical plate	WHL22.437769	Sp-Snrp70	U1 small nuclear ribonucleoprotein 70 kDa (LOC575726), mRNA	SPU_021366	nucleotide binding; nucleic acid binding	RNA recognition motif. (a.k.a. RRM, RBD, or RNP domain)	Unclassified
7.42021e-05	0.275036	0.035	0.013	1	apical plate	WHL22.55043	Sp-Atrx	transcriptional regulator ATRX homolog (LOC578567), mRNA	SPU_001388	nucleic acid binding; DNA binding; helicase activity; ATP binding	SNF2 family N-terminal domain; Cysteine Rich ADD domain; Helicase conserved C-terminal domain	NucleicAcid_Helicase
0.000131271	0.310896	0.035	0.013	1	apical plate	WHL22.708139	Sp-Slc16a6L_7; Sp-Slc16a12L_17	monocarboxylate transporter 13 (LOC752949), transcript variant X1, mRNA	SPU_023272; SPU_023273	transmembrane transport; integral component of membrane	Major Facilitator Superfamily	Metabolism_Carbohydrate
0.000164091	0.252076	0.088	0.047	1	apical plate	WHL22.770248	Sp-Dis	cell division cycle and apoptosis regulator protein 1 (LOC575098), mRNA	SPU_025572	apoptotic process; nucleic acid binding	DBC1; S1-like; SAP domain	NucleicAcid_Binding
0.00017787	0.334766	0.035	0.013	1	apical plate	WHL22.143911	Sp-Frmd3	FERM domain-containing protein 5 (LOC578812), mRNA	SPU_009716	cytoskeletal protein binding; cytoplasm; cytoskeleton; extrinsic component of membrane	FERM central domain; FERM N-terminal domain	Unclassified
0.000257375	0.255572	0.123	0.074	1	apical plate	WHL22.565061	Sp-Ccdc9	glutenin, high molecular weight subunit PW212 (LOC575508), transcript variant X4, mRNA	SPU_004862	protein binding	Domain of unknown function (DUF4594); PDZ domain; PDZ domain	Unclassified
0.00035103	0.295648	0.038	0.015	1	apical plate	WHL22.768495	Sp-Nol8	nucleolar protein 8-like (LOC105437158), mRNA	SPU_002132	nucleotide binding; nucleic acid binding	RNA recognition motif. (a.k.a. RRM, RBD, or RNP domain)	Unclassified
0.000358688	0.265775	0.123	0.075	1	apical plate	WHL22.625905	Sp-Methiapd2L	methionine aminopeptidase 2 (LOC578258), mRNA	SPU_000075	proteolysis; aminopeptidase activity; metalloexopeptidase activity	Metallopeptidase family M24	Metalloprotease
0.000374156	0.282812	0.053	0.025	1	apical plate	WHL22.583967	Sp-Gas2	growth arrest-specific protein 2 (LOC574975), transcript variant X1, mRNA	SPU_026635	cell cycle arrest; protein binding	Calponin homology (CH) domain; Growth-Arrest-Specific Protein 2 Domain	NA
0.000424401	0.256382	0.063	0.031	1	apical plate	WHL22.560152	Sp-Esf1	ESF1 homolog (LOC575642), transcript variant X6, mRNA	SPU_018790	nucleus	NUC153 domain	Unclassified
0.000476948	0.264161	0.158	0.104	1	apical plate	WHL22.377347	Sp-Akt3; Sp-Akt	RAC-gamma serine/threonine-protein kinase (LOC582192), transcript variant X1, mRNA	SPU_006549; SPU_010805	protein phosphorylation; protein kinase activity; ATP binding; transferase activity; transferring phosphorus-containing groups	Protein kinase domain; Protein tyrosine kinase	Kinase_AGC
0.00109864	0.261791	0.065	0.035	1	apical plate	WHL22.24964	Sp-Nudt5	ADP-sugar pyrophosphatase (LOC580253), mRNA	SPU_017628	hydrolase activity	NUDIX domain	Hydrolase
0.00184142	0.261678	0.206	0.149	1	apical plate	WHL22.393851	SPU_007671	enkurin (LOC578858), mRNA	SPU_007671	NA	Calmodulin-binding	NA
0.00198896	0.285301	0.161	0.112	1	apical plate	WHL22.453054	Sp-Abcf1	ATP-binding cassette sub-family F member 1 (LOC576400), mRNA	SPU_009335	nucleotide binding; ATP binding; ATPase activity; nucleoside-triphosphatase activity	ABC transporter; AAA domain, putative AbiEii toxin, Type IV TA system; AAA ATPase domain	Defensome_ABCTransporter
0	1.49179	0.962	0.736	0	aboral ectoderm	WHL22.350152	Sp-Ars_2	arylsulfatase (LOC582391), mRNA	SPU_006968	metabolic process; catalytic activity; sulfuric ester hydrolase activity	Sulfatase; C-terminal region of aryl-sulfatase	Hydrolase
0	1.33969	0.957	0.764	0	aboral ectoderm	WHL22.441611	SPU_013629	developmentally-regulated ectodermal protein (LOC753066), ncRNA	SPU_013629	NA	NA	NA
0	1.33335	0.997	0.92	0	aboral ectoderm	WHL22.255462	Sp-Ars_1	arylsulfatase (ARS), mRNA	SPU_023353	metabolic process; catalytic activity; sulfuric ester hydrolase activity	Sulfatase; C-terminal region of aryl-sulfatase; Type I phosphodiesterase / nucleotide pyrophosphatase	Hydrolase
0	1.31968	1	1	0	aboral ectoderm	WHL22.55201	Sp-Mt1	metallothionein a (MTa), misc_RNA	SPU_017989	metal ion binding	Metallothionein	Defensome_MetalDetoxification
4.44742e-296	1.28187	0.792	0.407	6.92863e-292	aboral ectoderm	WHL22.659635	SPU_024192	calcium-binding protein SPEC 1A (LOC585870), mRNA	SPU_024192	calcium ion binding	EF-hand domain pair; EF hand; EF-hand domain	Unclassified
1.93955e-294	1.22649	0.868	0.616	3.02163e-290	aboral ectoderm	WHL22.521616	SPU_019863	calmodulin-beta (LOC591437), mRNA	SPU_019863	calcium ion binding	EF hand; EF-hand domain pair; EF-hand domain	Unclassified
3.21091e-259	1.42035	0.459	0.131	5.00228e-255	aboral ectoderm	WHL22.660012	Sp-Glur3_1	glutamate receptor 2 (LOC591955), mRNA	SPU_028783	transport; ion transport; receptor activity; ionotropic glutamate receptor activity; transporter activity; ion channel activity; extracellular-glutamate-gated ion channel activity; membrane	Ligated ion channel L-glutamate- and glycine-binding site; Ligand-gated ion channel; Bacterial extracellular solute-binding proteins, family 3	NA
5.11293e-250	1.15829	0.717	0.379	7.96544e-246	aboral ectoderm	WHL22.288460	Sp-CplcaIIIb	actin, cytoskeletal 3B (LOC100890099), mRNA	SPU_009433	NA	Actin	Cytoskeleton_Actin
4.00307e-227	1.32518	0.625	0.275	6.23639e-223	aboral ectoderm	WHL22.612688	SPU_015753	galectin-3-binding protein (LOC100892690), transcript variant X2, mRNA	SPU_015753	scavenger receptor activity; membrane	Scavenger receptor cysteine-rich domain	Unclassified
1.18191e-224	1.19048	0.648	0.296	1.8413e-220	aboral ectoderm	WHL22.186396	Sp-Anxn; Sp-Anxn_1	annexin A4 (LOC593594), mRNA	SPU_011106; SPU_011107	calcium ion binding; calcium-dependent phospholipid binding	Annexin	CalciumToolkit
6.81863e-197	0.96969	0.944	0.773	1.06227e-192	aboral ectoderm	WHL22.173564	SPU_025449	epidermal growth factor-related protein (EGF2), mRNA	SPU_025449	calcium ion binding; protein binding	Calcium-binding EGF domain; EGF-like domain; EGF domain	Unclassified
1.91381e-196	1.25923	0.311	0.075	2.98152e-192	aboral ectoderm	WHL22.386245	Sp-Lrp1L_1	low-density lipoprotein receptor-related protein 2 (LOC579855), mRNA	SPU_000621	protein binding	Low-density lipoprotein receptor domain class A; CUB domain	Unclassified
4.39414e-184	1.09029	0.758	0.485	6.84563e-180	aboral ectoderm	WHL22.771108	Sp-Egfi; Sp-FibropellinL3	fibropellin I (egf1), transcript variant X4, mRNA	SPU_012655; SPU_027090	calcium ion binding; protein binding	EGF-like domain; Human growth factor-like EGF; Calcium-binding EGF domain	NA
3.27763e-150	0.467935	0.999	0.984	5.10622e-146	aboral ectoderm	WHL22.424734	Sp-Thymbh	thymosin beta (LOC373484), misc_RNA	SPU_026031	cytoskeleton organization; actin cytoskeleton organization; sequestering of actin monomers; actin binding; cytoplasm	Thymosin beta-4 family	Unclassified
2.85355e-148	1.09437	0.529	0.255	4.44555e-144	aboral ectoderm	WHL22.116291	Sp-CapsL	calcyphosin-like protein (LOC581526), mRNA	SPU_027158	calcium ion binding	EF-hand domain; EF hand; EF-hand domain pair	NA
3.00188e-148	0.617479	0.919	0.826	4.67662e-144	aboral ectoderm	WHL22.266094	SPU_017134	metallothionein b (MTB1), misc_RNA	SPU_017134	metal ion binding	Metallothionein	Defensome_MetalDetoxification
3.18105e-145	1.11903	0.374	0.137	4.95575e-141	aboral ectoderm	WHL22.147840	SPU_006199	ubiquitin-conjugating enzyme E2 D3 (LOC575665), transcript variant X2, mRNA	SPU_006199	acid-amino acid ligase activity	Ubiquitin-conjugating enzyme	Ubiquitin_Modifier
1.04083e-140	1.09258	0.2	0.042	1.62151e-136	aboral ectoderm	WHL22.653009	Sp-Sea/Egf/Hyalinl; Sp-Sea/Egf	uncharacterized LOC588928 (LOC588928), mRNA	SPU_002355; SPU_017657	calcium ion binding; protein binding	HYR domain; SEA domain; Calcium-binding EGF domain	NA
1.42386e-139	1.0429	0.608	0.34	2.21823e-135	aboral ectoderm	WHL22.470013	Sp-AhnakL	uncharacterized LOC105441578 (LOC105441578), mRNA	SPU_018932	NA	NA	NA
3.59502e-139	1.03405	0.468	0.208	5.60068e-135	aboral ectoderm	WHL22.77322	Sp-Redt	NADPH-dependent aldehyde reductase ARI1-like (LOC589772), mRNA	SPU_015290	cellular metabolic process; catalytic activity; coenzyme binding	NAD dependent epimerase/dehydratase family; 3-beta hydroxysteroid dehydrogenase/isomerase family; NAD(P)H-binding	Isomerase
1.02316e-136	0.841182	0.647	0.369	1.59399e-132	aboral ectoderm	WHL22.619797	WHL22.619797	tetraspanin (LOC751836), mRNA	NA	NA	NA	NA
7.9429e-124	0.773379	0.687	0.469	1.23742e-119	aboral ectoderm	WHL22.79658	Sp-Sdc	syndecan (Sdc), mRNA	SPU_003402	cytoskeletal protein binding; membrane	Syndecan domain	Adhesion_Proteoglycan
5.74552e-116	1.08107	0.391	0.16	8.95095e-112	aboral ectoderm	WHL22.736391	SPU_002378	uncharacterized LOC578796 (LOC578796), mRNA	SPU_002378	NA	NA	NA
1.40528e-115	1.02251	0.659	0.463	2.18929e-111	aboral ectoderm	WHL22.19105	SPU_025419	uncharacterized LOC582117 (LOC582117), mRNA	SPU_025419	NA	NA	NA
1.01127e-113	0.921474	0.179	0.041	1.57545e-109	aboral ectoderm	WHL22.506111	Sp-Eggbr1L_1; Sp-Klkb1; Sp-Hypp_1191	hyalin (LOC586971), partial mRNA	SPU_003635; SPU_012390; SPU_026917	protein binding	HYR domain; CUB domain; von Willebrand factor type D domain	BloodProtein
9.20491e-112	1.14042	0.246	0.075	1.43403e-107	aboral ectoderm	WHL22.733136	SPU_003077	heme-binding protein 2 (LOC581007), mRNA	SPU_003077	NA	SOUL heme-binding protein	NA
8.05211e-110	0.974034	0.295	0.103	1.25444e-105	aboral ectoderm	WHL22.538958	Sp-Ebr1_2	egg bindin receptor 1 (ebr1), mRNA	SPU_008369	proteolysis; metalloendopeptidase activity; metallopeptidase activity; zinc ion binding	HYR domain; CUB domain; Thrombospondin type 1 domain	Oogenesis
6.35907e-105	0.893572	0.166	0.037	9.90679e-101	aboral ectoderm	WHL22.535603	SPU_012405; SPU_023897	histamine N-methyltransferase (LOC582038), transcript variant X1, mRNA	SPU_012405; SPU_023897	NA	Methyltransferase domain; Methyltransferase domain	Transferase
2.13947e-99	0.821099	0.412	0.187	3.33308e-95	aboral ectoderm	WHL22.739969	Sp-Ttrspn_12	tetraspanin-11 (LOC594151), transcript variant X1, mRNA	SPU_014140	integral component of membrane	Tetraspanin family	Transmembrane
6.40186e-98	0.844682	0.482	0.251	9.97346e-94	aboral ectoderm	WHL22.289562	Sp-Btub1	tubulin beta chain (LOC586940), mRNA	SPU_002788	GTP catabolic process; microtubule-based process; protein polymerization; GTPase activity; structural constituent of cytoskeleton; GTP binding; microtubule; protein complex	Tubulin/FtsZ family, GTPase domain; Tubulin C-terminal domain; Misato Segment II tubulin-like domain	Cytoskeleton_Tubulin
1.22958e-92	0.857113	0.122	0.023	1.91556e-88	aboral ectoderm	WHL22.62263	WHL22.62263	uncharacterized LOC100889825 (LOC100889825), transcript variant X1, mRNA	NA	NA	NA	NA
4.83516e-90	1.13193	0.201	0.061	7.53269e-86	aboral ectoderm	WHL22.713685	Sp-GadD45	growth arrest and DNA damage-inducible protein GADD45 alpha (LOC100893493), transcript variant X2, mRNA	SPU_026064	response to stress; regulation of cell cycle; nucleus	NA	NA
2.59967e-89	0.927196	0.265	0.096	4.05002e-85	aboral ectoderm	WHL22.770360	Sp-Macf1; SPU_003259; Sp-Abp620h	microtubule-actin cross-linking factor 1 (LOC756550), transcript variant X4, mRNA	SPU_003258; SPU_003259; SPU_003260	protein binding	Spectrin repeat	NA
1.111e-88	0.986715	0.279	0.108	1.73083e-84	aboral ectoderm	WHL22.148654	SPU_008618	ubiquitin-conjugating enzyme E2 2 (LOC587016), mRNA	SPU_008618	acid-amino acid ligase activity	Ubiquitin-conjugating enzyme	Ubiquitin_Modifier
1.78987e-84	0.496002	0.817	0.635	2.78843e-80	aboral ectoderm	WHL22.130781	SPU_013329	protein SPEC3-like (LOC578575), mRNA	SPU_013329	NA	Ectodermal ciliogenesis protein	NA
2.01243e-83	0.809849	0.334	0.146	3.13517e-79	aboral ectoderm	WHL22.198511	Sp-Duoxa1	dual oxidase maturation factor 1 (LOC576350), transcript variant X2, mRNA	SPU_025513	protein transport; endoplasmic reticulum membrane; integral component of membrane	Dual oxidase maturation factor	Oxidase
4.03842e-83	0.625599	0.079	0.011	6.29146e-79	aboral ectoderm	WHL22.308760	Sp-Clect/Tm_7	P-selectin (LOC100891873), mRNA	SPU_028846	carbohydrate binding	Lectin C-type domain; Sushi repeat (SCR repeat); Ephrin type-A receptor 2 transmembrane domain	NA
9.99581e-81	0.870724	0.21	0.07	1.55725e-76	aboral ectoderm	WHL22.754708	Sp-Alox5_9	arachidonate 12-lipoxygenase, 12R-type (LOC579368), mRNA	SPU_023430	oxidation-reduction process; oxidoreductase activity; acting on single donors withincorporation of molecular oxygen; incorporation of two atoms of oxygen; metal ion binding	Lipoxygenase	Oxygenase
4.81939e-77	0.819422	0.167	0.048	7.50813e-73	aboral ectoderm	WHL22.202301	Sp-Mmp18/19L2	interstitial collagenase-like (LOC592649), misc_RNA	SPU_025345	proteolysis; metalloendopeptidase activity; metallopeptidase activity; zinc ion binding; extracellular matrix	Matrixin; Hemopexin	Metalloprotease
5.27679e-74	0.864305	0.183	0.058	8.22071e-70	aboral ectoderm	WHL22.496950	SPU_016001; Sp-Abcc9; Sp-Abcc9l	ATP-binding cassette sub-family C member 9-like (LOC586814), mRNA	SPU_016001; SPU_016002; SPU_023457	nucleotide binding; ATP binding; ATPase activity; nucleoside-triphosphatase activity	ABC transporter; RecF/RecN/SMC N terminal domain; AAA domain, putative AbiEii toxin, Type IV TA system	NA
2.89156e-73	0.813723	0.157	0.045	4.50476e-69	aboral ectoderm	WHL22.728221	Sp-Spec2d	spec2d protein (spec2d), mRNA	SPU_003175	calcium ion binding	EF-hand domain; EF hand; EF-hand domain pair	Unclassified
1.12928e-72	0.621272	0.687	0.545	1.7593e-68	aboral ectoderm	WHL22.731449	Sp-Sashp	thioredoxin (LOC582000), mRNA	SPU_017484	glycerol ether metabolic process; cell redox homeostasis; protein disulfide oxidoreductase activity	Thioredoxin; Thioredoxin-like domain	Oxidoreductase
1.21912e-71	0.774936	0.11	0.024	1.89927e-67	aboral ectoderm	WHL22.378691	Sp-Eggbr1L	hyalin (LOC576524), mRNA	SPU_001785	NA	HYR domain; PAN domain; SEA domain	Fertilization_EggReceptorBindin
5.84508e-69	0.944844	0.408	0.244	9.10605e-65	aboral ectoderm	WHL22.13463	Sp-Srcr74	uncharacterized LOC105441516 (LOC105441516), ncRNA	SPU_009145	scavenger receptor activity; membrane	Scavenger receptor cysteine-rich domain; Scavenger receptor cysteine-rich domain	ImmuneSystem_Receptor_SRCR
1.12179e-68	0.612893	0.581	0.409	1.74764e-64	aboral ectoderm	WHL22.54266	SPU_020523	uncharacterized LOC588339 (LOC588339), ncRNA	SPU_020523	NA	NA	NA
9.2239e-68	0.877916	0.301	0.137	1.43699e-63	aboral ectoderm	WHL22.434852	Sp-Fascin1; Sp-Fscn1	fascin (FSCN1), transcript variant X2, mRNA	SPU_010943; SPU_023199	protein binding; bridging; actin filament binding	Fascin domain; FRG1-like domain	Cytoskeleton_ActinBinding
3.33307e-67	0.705005	0.403	0.215	5.19259e-63	aboral ectoderm	WHL22.192209	Sp-Egf/HyalinL5; Sp-Hyalin15	uncharacterized LOC578978 (LOC578978), transcript variant X4, mRNA	SPU_000053; SPU_020971	calcium ion binding; protein binding	HYR domain; Domain of unknown function (DUF5011); EGF-like domain	NA
8.57513e-67	0.765463	0.322	0.153	1.33592e-62	aboral ectoderm	WHL22.323928	Sp-Unk_44	uncharacterized LOC577184 (LOC577184), transcript variant X2, mRNA	SPU_023443	cell-matrix adhesion; extracellular matrix structural constituent; calcium ion binding; protein binding; proteinaceous extracellular matrix; membrane	Calcium-binding EGF domain; Complement Clr-like EGF-like; EGF domain	NA
1.33756e-63	0.778771	0.193	0.07	2.08379e-59	aboral ectoderm	WHL22.234581	Sp-Rvt/Exn/End/Pplp_1	uncharacterized LOC585101 (LOC585101), mRNA	SPU_016918	RNA-dependent DNA replication; RNA binding; RNA-directed DNA polymerase activity; protein binding	Reverse transcriptase (RNA-dependent DNA polymerase); Ankyrin repeats (many copies); Ankyrin repeats (3 copies)	NA
1.62858e-63	0.709059	0.157	0.05	2.53716e-59	aboral ectoderm	WHL22.194095	Sp-Arsb_7	arylsulfatase B (LOC589185), mRNA	SPU_017068	metabolic process; catalytic activity; sulfuric ester hydrolase activity	Sulfatase	Hydrolase
3.2485e-60	0.680918	0.389	0.211	5.06083e-56	aboral ectoderm	WHL22.366536	Sp-Slc6a5_1	sodium-dependent alanine transporter 1 (LOC594544), transcript variant X2, mRNA	SPU_008339	neurotransmitter transport; neurotransmitter:sodium symporter activity; integral component of membrane	Sodium:neurotransmitter symporter family	NA
1.11984e-58	0.752258	0.167	0.058	1.7446e-54	aboral ectoderm	WHL22.435206	Sp-Grb2_1	growth factor receptor-bound protein 2 (LOC756009), transcript variant X1, mRNA	SPU_003586	protein binding	SH3 domain; Variant SH3 domain; Variant SH3 domain	Signaling_RTK_Docking
4.67017e-58	0.756693	0.336	0.173	7.27565e-54	aboral ectoderm	WHL22.51708	Sp-Bdnr; Sp-Hyalin2	uncharacterized LOC590790 (LOC590790), partial mRNA	SPU_000159; SPU_019632	calcium ion binding; protein binding	HYR domain; Fibronectin type III domain; EGF-like domain	Adhesion_IgFN3Receptor
2.2234e-57	0.727061	0.196	0.075	3.46384e-53	aboral ectoderm	WHL22.469808	Sp-Hypp_1875	uncharacterized LOC593892 (LOC593892), mRNA	SPU_009839	NA	NA	NA
2.67992e-57	1.08549	0.303	0.152	4.17504e-53	aboral ectoderm	WHL22.620148	Sp-AnL2; Sp-AnL3; Sp-AnL4; Sp-MeprinAaL	protein SpAN (LOC593467), transcript variant X2, misc_RNA	SPU_004115; SPU_004116; SPU_004117; SPU_030013	proteolysis; metalloendopeptidase activity; metallopeptidase activity; zinc ion binding	Astacin (Peptidase family M12A); CUB domain	Metalloprotease
3.12992e-57	0.750157	0.248	0.11	4.8761e-53	aboral ectoderm	WHL22.331647	Sp-Ttrspn_10	tetraspanin-1 (LOC576118), mRNA	SPU_012385	integral component of membrane	Tetraspanin family	Transmembrane
6.83947e-57	0.677281	0.104	0.026	1.06552e-52	aboral ectoderm	WHL22.633184	SPU_003108	uncharacterized LOC580501 (LOC580501), mRNA	SPU_003108	NA	NA	NA
1.02471e-56	0.816973	0.281	0.134	1.5964e-52	aboral ectoderm	WHL22.510905	Sp-Apob_1; Sp-Apob; Sp-Vtgn3	uncharacterized LOC580672 (LOC580672), mRNA	SPU_010738; SPU_015011; SPU_028683	lipid transport; lipid transporter activity	Domain of unknown function (DUF1943); Lipoprotein amino terminal region	NA
6.64931e-56	0.759441	0.181	0.068	1.0359e-51	aboral ectoderm	WHL22.324858	Sp-Fbn2L_1; Sp-Hypp_87; Sp-Hypp_702; Sp-Hypp_2279	fibrillin-2-like (LOC105436405), transcript variant X1, mRNA	SPU_008613; SPU_013077; SPU_013078; SPU_016774	extracellular matrix structural constituent; calcium ion binding; protein binding; proteinaceous extracellular matrix	EGF domain; Calcium-binding EGF domain; Complement Clr-like EGF-like	NA
1.30601e-55	0.69381	0.104	0.026	2.03463e-51	aboral ectoderm	WHL22.304756	Sp-Timp2c	metalloproteinase inhibitor 2 (LOC575130), mRNA	SPU_008860	protein binding; metalloendopeptidase inhibitor activity	Tissue inhibitor of metalloproteinase	Unclassified
1.57631e-55	0.631725	0.128	0.038	2.45573e-51	aboral ectoderm	WHL22.476701	Sp-Phlpb_2	phospholipase B1, membrane-associated (LOC578635), mRNA	SPU_022413	lipid metabolic process; hydrolase activity; hydrolase activity; acting on ester bonds	GDSL-like Lipase/Acylhydrolase; GDSL-like Lipase/Acylhydrolase family	Metabolism_Lipid
3.11489e-55	0.595755	0.074	0.014	4.85269e-51	aboral ectoderm	WHL22.397555	SPU_009748; Sp-Unc44_122; SPU_020090	transient receptor potential cation channel subfamily A member 1 (LOC100890525), transcript variant X1, mRNA	SPU_009748; SPU_017113; SPU_020090	protein binding	Ankyrin repeats (3 copies); Ankyrin repeats (many copies); Ankyrin repeat	Unclassified
1.13935e-53	0.833053	0.261	0.127	1.77499e-49	aboral ectoderm	WHL22.86859	Sp-Fmn/Abp; Sp-Flnb	filamin-B (LOC579510), mRNA	SPU_017634; SPU_028502	actin binding; protein binding	Filamin/ABP280 repeat; Calponin homology (CH) domain; Invasin, domain 3	Cytoskeleton_ActinBinding
4.14627e-53	0.785785	0.534	0.405	6.45947e-49	aboral ectoderm	WHL22.39103	Sp-Pdcd6ip_2	galectin-3-binding protein B-like (LOC584637), mRNA	SPU_009210	scavenger receptor activity; protein binding; membrane	Scavenger receptor cysteine-rich domain; ALIX V-shaped domain binding to HIV	Unclassified
1.10029e-52	0.699363	0.215	0.09	1.71415e-48	aboral ectoderm	WHL22.339272	Sp-Slc8a2; Sp-Slc8a3	sodium/calcium exchanger 3 (LOC590169), transcript variant X2, mRNA	SPU_021793; SPU_026183	calcium ion transport; cell communication; transmembrane transport; calcium:sodium antiporter activity; membrane; integral component of membrane	Calx-beta domain; Sodium/calcium exchanger protein; C-terminal extension of sodium/calcium exchanger domain	CalciumToolkit
1.7655e-52	0.722357	0.13	0.041	2.75047e-48	aboral ectoderm	WHL22.374781	Sp-Alox5_8; SPU_018637	arachidonate 5-lipoxygenase (LOC583823), mRNA	SPU_018636; SPU_018637	oxidation-reduction process; protein binding; oxidoreductase activity; acting on single donors withincorporation of molecular oxygen; incorporation of two atoms of oxygen; metal ion binding	Lipoxygenase; PLAT/LH2 domain	Oxygenase
5.35328e-52	0.697466	0.184	0.072	8.33987e-48	aboral ectoderm	WHL22.649215	Sp-Wasf2	wiskott-Aldrich syndrome protein family member 2 (LOC576417), mRNA	SPU_023423	actin cytoskeleton organization; actin binding; cytoskeleton	WH2 motif	NA
8.28546e-52	0.664821	0.094	0.023	1.29079e-47	aboral ectoderm	WHL22.147005	Sp-Hypp_1150	protein Skeletor, isoforms B/C (LOC579039), mRNA	SPU_025499	scavenger receptor activity; membrane	Electron transfer DM13; DOMON domain; Scavenger receptor cysteine-rich domain	NA
1.86706e-51	0.599836	0.075	0.016	2.90869e-47	aboral ectoderm	WHL22.620033	Sp-Unc44_253	transient receptor potential cation channel subfamily A member 1 homolog (LOC586866), mRNA	SPU_024436	ion transport; transmembrane transport; ion channel activity; protein binding; membrane	Ankyrin repeats (3 copies); Ankyrin repeats (many copies); Ankyrin repeats (many copies)	Unclassified
1.13172e-48	0.64248	0.103	0.029	1.76311e-44	aboral ectoderm	WHL22.563585	Sp-Trpc3_1	short transient receptor potential channel 1 (LOC100888115), transcript variant X1, mRNA	SPU_015194	calcium ion transmembrane transport; calcium channel activity; membrane	Ion transport protein; Transient receptor ion channel II	CalciumToolkit
6.01228e-48	0.660991	0.121	0.038	9.36654e-44	aboral ectoderm	WHL22.143760	Sp-Frem2	extracellular matrix protein 3 (LOC579397), mRNA	SPU_001796	cell communication; integral component of membrane	Calx-beta domain	NA
1.1039e-47	0.676657	0.196	0.083	1.71977e-43	aboral ectoderm	WHL22.171238	Sp-Slsp	proteinase T (LOC582641), mRNA	SPU_015368	proteolysis; serine-type endopeptidase activity	Subtilase family; Peptidase inhibitor I9	Metabolism_PeptidaseInhibitor
7.61639e-46	0.646572	0.107	0.032	1.18656e-41	aboral ectoderm	WHL22.677419	WHL22.677419	putative ammonium transporter 1 (LOC576657), mRNA	NA	NA	NA	NA
4.46296e-45	0.67127	0.144	0.052	6.95285e-41	aboral ectoderm	WHL22.659615	Sp-Itpk1	inositol-tetrakisphosphate 1-kinase (LOC580408), mRNA	SPU_007179	inositol trisphosphate metabolic process; magnesium ion binding; ATP binding; metal ion binding; inositol tetrakisphosphate 1-kinase activity; inositol-1;3;4-trisphosphate 6-kinase activity; inositol-1;3;4-trisphosphate 5-kinase activity; intracellular	Inositol 1,3,4-trisphosphate 5/6-kinase ATP-grasp domain; Inositol 1,3,4-trisphosphate 5/6-kinase pre-ATP-grasp domain	NA
3.81239e-44	0.6321	0.168	0.067	5.93932e-40	aboral ectoderm	WHL22.547686	SPU_007029	uncharacterized LOC589127 (LOC589127), mRNA	SPU_007029	NA	NA	NA
1.60465e-43	0.670511	0.177	0.074	2.49989e-39	aboral ectoderm	WHL22.108947	Sp-Syt14	synaptotagmin-14 (LOC577619), transcript variant X5, mRNA	SPU_001640	protein binding	C2 domain	Nervous_SynapticVesicleRelease
7.26644e-43	0.538791	0.097	0.028	1.13204e-38	aboral ectoderm	WHL22.359107	Sp-Slc16a6L_11	uncharacterized LOC592780 (LOC592780), mRNA	SPU_026850	transmembrane transport; integral component of membrane	Major Facilitator Superfamily	Metabolism_Carbohydrate
1.30163e-41	0.695747	0.21	0.098	2.02781e-37	aboral ectoderm	WHL22.464567	SPU_013916	probable serine/threonine-protein kinase mkcF (LOC100892278), transcript variant X1, mRNA	SPU_013916	NA	NA	NA
7.6194e-41	0.582628	0.477	0.345	1.18703e-36	aboral ectoderm	WHL22.34872	Sp-Hypp_885	protein DD3-3 (LOC577037), mRNA	SPU_017630	NA	NA	NA
1.11004e-39	0.652526	0.194	0.089	1.72933e-35	aboral ectoderm	WHL22.335751	Sp-Akt_1	RAC serine/threonine-protein kinase (LOC582897), transcript variant X1, mRNA	SPU_017694	protein phosphorylation; protein kinase activity; protein serine/threonine kinase activity; ATP binding; transferase activity; transferring phosphorus-containing groups	Protein kinase domain; Protein tyrosine kinase; Kinase-like	Kinase_AGC
1.64346e-39	0.627859	0.108	0.036	2.56034e-35	aboral ectoderm	WHL22.576737	Sp-Srcr99; SPU_011102	neurotrypsin (LOC590898), mRNA	SPU_011101; SPU_011102	scavenger receptor activity; membrane	Scavenger receptor cysteine-rich domain; Scavenger receptor cysteine-rich domain	ImmuneSystem_Receptor_SRCR
1.99148e-39	0.511117	0.389	0.246	3.10252e-35	aboral ectoderm	WHL22.576938	SPU_026529	uncharacterized LOC577041 (LOC577041), transcript variant X1, ncRNA	SPU_026529	NA	NA	NA
2.00577e-39	0.702389	0.128	0.047	3.12479e-35	aboral ectoderm	WHL22.472898	SPU_006627	calcium-binding protein SPEC 2D (LOC591992), mRNA	SPU_006627	calcium ion binding	EF hand; EF-hand domain; EF-hand domain pair	Unclassified
6.32819e-39	0.611785	0.102	0.033	9.85869e-35	aboral ectoderm	WHL22.479525	WHL22.479525	uncharacterized LOC100889020 (LOC100889020), transcript variant X2, mRNA	NA	NA	NA	NA
1.73177e-38	0.68196	0.274	0.153	2.69793e-34	aboral ectoderm	WHL22.742473	SPU_018675; Sp-Pdia6	probable protein disulfide-isomerase A6 (LOC585584), mRNA	SPU_018675; SPU_019929	NA	NA	NA
3.72172e-38	0.541073	0.082	0.023	5.79806e-34	aboral ectoderm	WHL22.307738	Sp-CholdhL_1	uncharacterized LOC592399 (LOC592399), mRNA	SPU_027832	oxidation-reduction process; oxidoreductase activity; acting on CH-OH group of donors; flavin adenine dinucleotide binding	GMC oxidoreductase; GMC oxidoreductase; alpha/beta hydrolase fold	NA
4.79523e-37	0.590607	0.4	0.271	7.47048e-33	aboral ectoderm	WHL22.35582	Sp-Hypp_887	protein DD3-3 (LOC580128), mRNA	SPU_017641	NA	NA	NA
9.01215e-37	0.54173	0.069	0.018	1.404e-32	aboral ectoderm	WHL22.186660	Sp-Unc4-1; Sp-Unc4.1	homeobox protein unc-4 homolog (LOC577625), transcript variant X2, mRNA	SPU_001739; SPU_013704	regulation of transcription; DNA-templated; DNA binding; sequence-specific DNA binding transcription factoractivity; sequence-specific DNA binding; nucleus	Homeodomain; Endonuclease-reverse transcriptase	TranscriptionFactor_Homeo
1.23312e-36	0.625592	0.105	0.036	1.92107e-32	aboral ectoderm	WHL22.4106	WHL22.4106	calpain-5 (LOC592894), mRNA	NA	NA	NA	NA
1.85158e-36	0.60008	0.122	0.046	2.88458e-32	aboral ectoderm	WHL22.435066	SPU_020708	calcium-binding protein SPEC 2C (LOC100893488), transcript variant X1, mRNA	SPU_020708	calcium ion binding	EF-hand domain pair	NA
3.4031e-36	0.573136	0.15	0.061	5.30169e-32	aboral ectoderm	WHL22.364119	Sp-Dhcr7	7-dehydrocholesterol reductase (LOC576295), transcript variant X1, mRNA	SPU_010687	oxidation-reduction process; oxidoreductase activity; acting on the CH-CH group of donors;NAD or NADP as acceptor; membrane	Ergosterol biosynthesis ERG4/ERG24 family	Unclassified
4.09844e-36	0.549535	0.092	0.029	6.38496e-32	aboral ectoderm	WHL22.536230	Sp-Ugt2b1_1	UDP-glucuronosyltransferase-like (LOC575220), mRNA	SPU_016298	metabolic process; transferase activity; transferring hexosyl groups	UDP-glucoronosyl and UDP-glucosyl transferase	Defensome_ReductiveConjugativeBiotransformation
5.90822e-36	0.425164	0.045	0.008	9.20441e-32	aboral ectoderm	WHL22.404014	Sp-Msp130r5	mesenchyme-specific cell surface glycoprotein (LOC591905), transcript variant X2, mRNA	SPU_015763	nucleotide catabolic process; protein binding; hydrolase activity	NA	Biomineralization_MSP130
3.74298e-35	0.619536	0.152	0.066	5.83119e-31	aboral ectoderm	WHL22.164144	Sp-Dcdsh_3	bifunctional D-cysteine desulfhydrase/1-aminocyclopropane-1-carboxylate deaminase, mitochondrial (LOC591789), transcript variant X1, mRNA	SPU_021965	NA	Pyridoxal-phosphate dependent enzyme	NA
5.11621e-35	0.566726	0.286	0.168	7.97054e-31	aboral ectoderm	WHL22.667991	Sp-Adam10	disintegrin and metalloproteinase domain-containing protein 10 (LOC581388), mRNA	SPU_028173	proteolysis; metalloendopeptidase activity; metallopeptidase activity; zinc ion binding	Metallo-peptidase family M12B Reprolysin-like; Reprolysin family propeptide	Metallopeptidase
1.36827e-33	0.55109	0.163	0.073	2.13163e-29	aboral ectoderm	WHL22.263711	Sp-Tkt	transketolase (LOC576207), transcript variant X2, mRNA	SPU_016441	metabolic process; catalytic activity	Transketolase, thiamine diphosphate binding domain; Transketolase, pyrimidine binding domain; Transketolase, C-terminal domain	Metabolism_Carbohydrate
2.45509e-33	0.573095	0.131	0.053	3.82479e-29	aboral ectoderm	WHL22.735550	Sp-Hypp_2821	uncharacterized LOC756858 (LOC756858), transcript variant X1, mRNA	SPU_026140	transport; transporter activity	Bacterial extracellular solute-binding proteins, family 3	NA
2.05733e-32	0.820606	0.276	0.171	3.20511e-28	aboral ectoderm	WHL22.416148	Sp-Spec2c; Sp-Spec2a	calcium-binding protein SPEC 2C (LOC100888959), mRNA	SPU_007449; SPU_026687	calcium ion binding	EF-hand domain pair; EF hand; EF-hand domain	Unclassified
8.54586e-32	0.5992	0.125	0.051	1.33136e-27	aboral ectoderm	WHL22.630154	Sp-Hox7; Sp-Hox7_1	homeobox hox 1 (hox1), mRNA	SPU_002634; SPU_005170	NA	NA	TranscriptionFactor_Homeo
1.94092e-31	0.584349	0.136	0.058	3.02376e-27	aboral ectoderm	WHL22.6663	Sp-Serinc1	probable serine incorporator (LOC755589), mRNA	SPU_026982	membrane	Serine incorporator (Serinc)	Unclassified
1.00137e-30	0.534751	0.081	0.026	1.56003e-26	aboral ectoderm	WHL22.518304	Sp-TlrP16	solute carrier organic anion transporter family member 4A1 (LOC581658), mRNA	SPU_015789	transport; transporter activity; protein binding; membrane	Organic Anion Transporter Polypeptide (OATP) family; Major Facilitator Superfamily; Leucine rich repeat	Metabolism_SecondaryMetabolites
1.03602e-30	0.607172	0.209	0.112	1.61402e-26	aboral ectoderm	WHL22.599379	Sp-HpcaL1	hippocalcin-like protein 1 (LOC577811), transcript variant X2, mRNA	SPU_026993	calcium ion binding	EF-hand domain pair; EF hand; EF-hand domain	Unclassified
1.31505e-30	0.446222	0.066	0.019	2.04872e-26	aboral ectoderm	WHL22.552518	Sp-Abtb1; Sp-Abtb1_1	ankyrin repeat and BTB/POZ domain-containing protein 1 (LOC583137), transcript variant X2, mRNA	SPU_009698; SPU_016057	protein binding	BTB/POZ domain; Ankyrin repeats (3 copies); Ankyrin repeats (many copies)	Unclassified
2.30391e-30	0.35877	0.04	0.008	3.58926e-26	aboral ectoderm	WHL22.615049	Sp-Hypp_2642	solute carrier family 43 member 3 (LOC752074), mRNA	SPU_022996	NA	Sugar efflux transporter for intercellular exchange	Transmembrane
3.69788e-29	0.754669	0.17	0.085	5.76093e-25	aboral ectoderm	WHL22.699183	Sp-Hypp_1626; Sp-Hypp_1813	uncharacterized LOC582157 (LOC582157), transcript variant X1, mRNA	SPU_006032; SPU_008920	regulation of transcription; DNA-templated; sequence-specific DNA binding transcription factor activity; sequence-specific DNA binding	Basic region leucine zipper	Transcription_Regulation
1.76769e-28	0.549315	0.272	0.164	2.75389e-24	aboral ectoderm	WHL22.580443	SPU_027438	uncharacterized LOC578221 (LOC578221), mRNA	SPU_027438	NA	NA	NA
1.33168e-27	0.491959	0.207	0.111	2.07462e-23	aboral ectoderm	WHL22.205480	SPU_007598	uncharacterized LOC576138 (LOC576138), mRNA	SPU_007598	NA	NA	NA
6.40357e-27	0.561615	0.27	0.17	9.97612e-23	aboral ectoderm	WHL22.752274	Sp-Hypp_1234	uncharacterized LOC585395 (LOC585395), mRNA	SPU_028577	protein binding; zinc ion binding; metal ion binding; intracellular	RING-type zinc-finger; Zinc finger, C3HC4 type (RING finger); B-box zinc finger	NA
7.02259e-27	0.432199	0.057	0.016	1.09405e-22	aboral ectoderm	WHL22.446591	Sp-Nacha3_1	neuronal acetylcholine receptor subunit alpha-3 (LOC581601), mRNA	SPU_023216	transport; ion transport; acetylcholine-activated cation-selective channel activity; ion channel activity; extracellular ligand-gated ion channel activity; membrane; integral component of membrane; postsynaptic membrane	Neurotransmitter-gated ion-channel ligand binding domain; Neurotransmitter-gated ion-channel transmembrane region	CalciumToolkit
8.30163e-27	0.530381	0.157	0.076	1.29331e-22	aboral ectoderm	WHL22.384500	SPU_022532	sushi, nidogen and EGF-like domain-containing protein 1 (LOC575250), transcript variant X1, mRNA	SPU_022532	protein binding	EGF-like domain	Unclassified
1.19679e-26	0.318812	0.711	0.618	1.86448e-22	aboral ectoderm	WHL22.16181	Sp-Profilin	profilin (Coel1), mRNA	SPU_020197	NA	Profilin	Cytoskeleton_ActinBinding
4.75748e-26	0.405751	0.512	0.417	7.41167e-22	aboral ectoderm	WHL22.457909	Sp-Rbms3	RNA-binding motif, single-stranded-interacting protein 3 (LOC586576), transcript variant X6, mRNA	SPU_001125	nucleotide binding; nucleic acid binding; RNA binding	RNA recognition motif. (a.k.a. RRM, RBD, or RNP domain)	Unclassified
4.98527e-26	0.495164	0.083	0.03	7.76654e-22	aboral ectoderm	WHL22.631589	Sp-Cd59/Sca2L1	uncharacterized LOC100892532 (LOC100892532), mRNA	SPU_030142	NA	NA	ImmuneSystem_Effector_Complement
7.46257e-26	0.525686	0.116	0.05	1.16259e-21	aboral ectoderm	WHL22.524985	SPU_025710; SPU_025711	protein rolling stone (LOC752655), mRNA	SPU_025710; SPU_025711	NA	NA	NA
3.47734e-25	0.425975	0.06	0.018	5.41735e-21	aboral ectoderm	WHL22.8014	Sp-Trpc3	short transient receptor potential channel 4 (LOC586872), transcript variant X1, mRNA	SPU_012792	ion transport; transmembrane transport; calcium ion transmembrane transport; ion channel activity; calcium channel activity; protein binding; membrane	Ion transport protein; Transient receptor ion channel II; Ankyrin repeats (3 copies)	CalciumToolkit
5.0287e-25	0.547462	0.086	0.032	7.83421e-21	aboral ectoderm	WHL22.295643	Sp-Capn5L; SPU_015995; Sp-Capn5	calpain-5 (LOC587391), transcript variant X1, mRNA	SPU_012537; SPU_015995; SPU_015996	protein binding	Calpain large subunit, domain III; C2 domain	NA
2.41128e-24	0.444927	0.054	0.016	3.75653e-20	aboral ectoderm	WHL22.642563	Sp-Ephx2_1; SPU_027306	soluble epoxide hydrolase-like protein 2 (eh2), mRNA	SPU_004137; SPU_027306	metabolic process; hydrolase activity	alpha/beta hydrolase fold; Haloacid dehalogenase-like hydrolase; haloacid dehalogenase-like hydrolase	Hydrolase
2.62397e-24	0.513457	0.23	0.137	4.08789e-20	aboral ectoderm	WHL22.706948	Sp-EpimL	UDP-glucuronic acid decarboxylase 1-like (LOC579449), transcript variant X1, mRNA	SPU_027926	cellular metabolic process; catalytic activity; coenzyme binding	NAD dependent epimerase/dehydratase family; GDP-mannose 4,6 dehydratase; RmlD substrate binding domain	Isomerase
3.22807e-24	0.471413	0.088	0.034	5.02902e-20	aboral ectoderm	WHL22.214916	WHL22.214916	actin, cytoskeletal 3 (LOC752849), mRNA	NA	NA	NA	NA
6.16106e-24	0.347447	0.032	0.006	9.59831e-20	aboral ectoderm	WHL22.399096	Sp-Hypp_2577	uncharacterized LOC752302 (LOC752302), mRNA	SPU_021768	NA	NA	NA
1.4951e-23	0.502661	0.094	0.038	2.32922e-19	aboral ectoderm	WHL22.613078	Sp-Ets4	Ets4 transcription factor (Ets4), mRNA	SPU_008528	regulation of transcription; DNA-templated; sequence-specific DNA binding transcription factor activity; sequence-specific DNA binding; nucleus	Ets-domain; Sterile alpha motif (SAM)/Pointed domain	TranscriptionFactor_Ets
2.49586e-23	0.667833	0.222	0.137	3.88829e-19	aboral ectoderm	WHL22.252879	WHL22.252879	severin (LOC753847), transcript variant X1, mRNA	NA	NA	NA	NA
3.82619e-23	0.36515	0.045	0.012	5.96082e-19	aboral ectoderm	WHL22.320462	Sp-Hs3st5L_3	heparan sulfate glucosamine 3-O-sulfotransferase 1 (LOC753465), transcript variant X3, mRNA	SPU_028419	sulfotransferase activity	Sulfotransferase domain; Sulfotransferase family	Transferase
4.27119e-23	0.334968	0.06	0.019	6.65409e-19	aboral ectoderm	WHL22.734431	SPU_007206; SPU_008247	uncharacterized LOC577900 (LOC577900), transcript variant X1, mRNA	SPU_007206; SPU_008247	metabolic process; methyltransferase activity	Methyltransferase domain; Methyltransferase domain; Methyltransferase domain	Transferase
4.63911e-23	0.396908	0.054	0.016	7.22727e-19	aboral ectoderm	WHL22.643858	Sp-Rlp2	solute carrier family 2, facilitated glucose transporter member 1 (LOC590274), mRNA	SPU_022750	transport; transmembrane transport; transporter activity; transmembrane transporter activity; substrate-specific transmembrane transporter activity; membrane; integral component of membrane	Sugar (and other) transporter; Major Facilitator Superfamily	Metabolism_Carbohydrate
4.82308e-23	0.400827	0.051	0.015	7.51388e-19	aboral ectoderm	WHL22.704081	Sp-Arsb_2	arylsulfatase B (LOC589185), mRNA	SPU_017784	metabolic process; catalytic activity; sulfuric ester hydrolase activity	Sulfatase	Hydrolase
7.57529e-23	0.596752	0.193	0.112	1.18015e-18	aboral ectoderm	WHL22.248580	Sp-Atp2a1_1; Sp-Serca_1	sarco/endoplasmic reticulum calcium transporting ATPase (SERCA), transcript variant X1, mRNA	SPU_006779; SPU_008535	nucleotide binding; metal ion binding	Cation transporter/ATPase, N-terminus; E1-E2 ATPase	CalciumToolkit
1.04413e-22	0.383696	0.062	0.02	1.62665e-18	aboral ectoderm	WHL22.350022	Sp-Hao1_3; Sp-Hao1_18	hydroxyacid oxidase 1 (LOC590153), transcript variant X2, mRNA	SPU_004798; SPU_019094	oxidation-reduction process; catalytic activity; FMN binding; oxidoreductase activity	FMN-dependent dehydrogenase; IMP dehydrogenase / GMP reductase domain	Metabolism_Energy
1.49876e-22	0.453982	0.127	0.06	2.33492e-18	aboral ectoderm	WHL22.150227	Sp-Kcnk18L_2	TWiK family of potassium channels protein 18 (LOC593738), mRNA	SPU_024085	potassium ion transmembrane transport; potassium channel activity; membrane	Ion channel; Ion transport protein	Metabolism_InorganicIon
4.48825e-22	0.256756	0.028	0.005	6.99224e-18	aboral ectoderm	WHL22.276112	Sp-Ggt1_8	gamma-glutamyltranspeptidase 1 (LOC100891710), mRNA	SPU_008728	glutathione metabolic process; gamma-glutamyltransferase activity	Gamma-glutamyltranspeptidase	Metabolism_AminoAcid
8.67485e-22	0.565495	0.115	0.053	1.35146e-17	aboral ectoderm	WHL22.483798	Sp-Klf2/4	Krueppel-like factor 5 (LOC576170), mRNA	SPU_020311	nucleic acid binding; metal ion binding	Zinc-finger double domain; Zinc finger, C2H2 type	ZincFinger
2.17238e-21	0.402523	0.092	0.038	3.38435e-17	aboral ectoderm	WHL22.369847	SPU_018589	uncharacterized LOC105447182 (LOC105447182), mRNA	SPU_018589	NA	NA	NA
3.71831e-21	0.308034	0.04	0.01	5.79275e-17	aboral ectoderm	WHL22.221377	Sp-Ugt1L_2	uncharacterized LOC582390 (LOC582390), mRNA	SPU_010704	metabolic process; transferase activity; transferring hexosyl groups	UDP-glucoronosyl and UDP-glucosyl transferase	Defensome_ReductiveConjugativeBiotransformation
3.72732e-21	0.269187	0.029	0.006	5.80678e-17	aboral ectoderm	WHL22.581093	Sp-Vwde; Sp-Adam/TsL3	von Willebrand factor D and EGF domain-containing protein (LOC100891163), mRNA	SPU_026797; SPU_026798	protein binding	EGF-like domain; von Willebrand factor type D domain; EGF-like domain	BloodProtein
4.15721e-21	0.438517	0.274	0.18	6.47652e-17	aboral ectoderm	WHL22.728979	SPU_012711	uncharacterized LOC593216 (LOC593216), mRNA	SPU_012711	NA	NA	NA
5.29897e-20	0.483525	0.079	0.032	8.25526e-16	aboral ectoderm	WHL22.24964	Sp-Nudt5	ADP-sugar pyrophosphatase (LOC580253), mRNA	SPU_017628	hydrolase activity	NUDIX domain	Hydrolase
8.2351e-20	0.361797	0.5	0.404	1.28295e-15	aboral ectoderm	WHL22.720265	Sp-Polyq	polyubiquitin-C (LOC105436409), transcript variant X2, mRNA	SPU_021496	protein binding	Ubiquitin family; Ubiquitin-2 like Rad60 SUMO-like; Ubiquitin-like domain	Hydrolase
8.73802e-20	0.40753	0.067	0.025	1.3613e-15	aboral ectoderm	WHL22.647633	Sp-Nacha2_1	neuronal acetylcholine receptor subunit alpha-3 (LOC581710), transcript variant X1, mRNA	SPU_001774	transport; ion transport; acetylcholine-activated cation-selective channel activity; ion channel activity; extracellular ligand-gated ion channel activity; membrane; integral component of membrane; postsynaptic membrane	Neurotransmitter-gated ion-channel transmembrane region; Neurotransmitter-gated ion-channel ligand binding domain	CalciumToolkit
1.35319e-19	0.479917	0.108	0.051	2.10814e-15	aboral ectoderm	WHL22.433365	Sp-Mvp; Sp-Mvp	major vault protein (mvp), mRNA	SPU_000881; SPU_007085	protein binding	Major Vault Protein repeat domain; Shoulder domain; Major Vault Protein repeat domain	NA
2.416e-19	0.25291	0.028	0.006	3.76389e-15	aboral ectoderm	WHL22.171222	WHL22.171222	bone morphogenetic protein 7-like (LOC100891353), partial mRNA	NA	NA	NA	NA
3.39542e-19	0.381768	0.051	0.016	5.28972e-15	aboral ectoderm	WHL22.573757	Sp-Sat2_5	diamine acetyltransferase 2 (LOC593507), mRNA	SPU_021652	N-acetyltransferase activity	Acetyltransferase (GNAT) family; Acetyltransferase (GNAT) domain; Acetyltransferase (GNAT) domain	Transferase
4.97585e-19	0.315133	0.638	0.608	7.75188e-15	aboral ectoderm	WHL22.674251	Sp-Gabarap	gamma-aminobutyric acid receptor-associated protein (LOC105447194), mRNA	SPU_006271	NA	Autophagy protein Atg8 ubiquitin like; Ubiquitin-like autophagy protein Apg12	Unclassified
6.59549e-19	0.565829	0.118	0.06	1.02751e-14	aboral ectoderm	WHL22.192605	Sp-Sqst1L	sequestosome-1 (LOC590854), transcript variant X2, mRNA	SPU_007251	protein binding; zinc ion binding	PB1 domain; Zinc finger, ZZ type; UBA domain	NA
1.37423e-18	0.345601	0.037	0.01	2.14091e-14	aboral ectoderm	WHL22.508782	Sp-CholdhL	uncharacterized LOC100889820 (LOC100889820), mRNA	SPU_025192	oxidation-reduction process; oxidoreductase activity; acting on CH-OH group of donors; flavin adenine dinucleotide binding	GMC oxidoreductase; GMC oxidoreductase; Alpha/beta hydrolase family	Oxidoreductase
1.60519e-18	0.347676	0.056	0.02	2.50072e-14	aboral ectoderm	WHL22.73761	Sp-Hypp_3096; Sp-Hypp_958	hyalin (LOC575774), transcript variant X1, mRNA	SPU_003761; SPU_020047	protein binding	HYR domain; SEA domain	NA
3.2409e-18	0.432126	0.088	0.039	5.049e-14	aboral ectoderm	WHL22.339658	Sp-Rbm35A	epithelial splicing regulatory protein 2 (LOC588026), transcript variant X1, mRNA	SPU_014611	nucleotide binding; nucleic acid binding	RNA recognition motif. (a.k.a. RRM, RBD, or RNP domain)	Unclassified
3.79529e-18	0.406463	0.087	0.038	5.91267e-14	aboral ectoderm	WHL22.694887	SPU_003326; Sp-Ttrspn_5	tetraspanin-33 (LOC583302), mRNA	SPU_003326; SPU_008996	integral component of membrane	Tetraspanin family	Transmembrane
4.22515e-18	0.456504	0.167	0.097	6.58236e-14	aboral ectoderm	WHL22.259626	Sp-Cbr1_2; SPU_014400	carbonyl reductase [NADPH] 1 (LOC100889317), mRNA	SPU_014399; SPU_014400	metabolic process; oxidoreductase activity	short chain dehydrogenase; Enoyl-(Acyl carrier protein) reductase; KR domain	Dehydrogenase
4.47917e-18	0.318626	0.033	0.008	6.97809e-14	aboral ectoderm	WHL22.758629	SPU_006341; SPU_011420	DNA-directed RNA polymerase II subunit RPB1-like (LOC100889104), transcript variant X2, mRNA	SPU_006341; SPU_011420	NA	NA	NA
7.3861e-18	0.341357	0.051	0.018	1.15068e-13	aboral ectoderm	WHL22.669721	Sp-Slc16a6_4	monocarboxylate transporter 7 (LOC753268), transcript variant X1, mRNA	SPU_021775	transmembrane transport; integral component of membrane	Major Facilitator Superfamily; PUCC protein	Metabolism_Carbohydrate
7.65991e-18	0.351825	0.052	0.018	1.19334e-13	aboral ectoderm	WHL22.613803	Sp-Hypp_2099	uncharacterized LOC592090 (LOC592090), mRNA	SPU_013713	NA	NA	NA
1.33538e-17	0.307674	0.04	0.012	2.08038e-13	aboral ectoderm	WHL22.581765	Sp-Hypp_1362	uncharacterized LOC100890105 (LOC100890105), mRNA	SPU_001989	sulfotransferase activity; integral component of membrane	Sulfotransferase family	NA
1.96829e-17	0.438328	0.275	0.189	3.06639e-13	aboral ectoderm	WHL22.104606	Sp-Soxb1	transcription factor SoxB1 (SoxB1), mRNA	SPU_022820	NA	HMG (high mobility group) box; SOX transcription factor; HMG-box domain	Nervous_TF
1.97381e-17	0.467628	0.185	0.112	3.075e-13	aboral ectoderm	WHL22.765203	Sp-Slc44a2	choline transporter-like protein 2 (LOC593044), mRNA	SPU_003329	binding	Plasma-membrane choline transporter	Metabolism_Lipid
2.39391e-17	0.36842	0.039	0.011	3.72948e-13	aboral ectoderm	WHL22.565717	Sp-Enpp3_2	venom phosphodiesterase 2 (LOC763705), mRNA	SPU_006723	metabolic process; nucleic acid binding; catalytic activity; hydrolase activity; metal ion binding	Type I phosphodiesterase / nucleotide pyrophosphatase; DNA/RNA non-specific endonuclease	Hydrolase
3.34714e-17	0.39554	0.106	0.053	5.21451e-13	aboral ectoderm	WHL22.386515	Sp-Sumf2	uncharacterized LOC105442679 (LOC105442679), ncRNA	SPU_014549	NA	Sulfatase-modifying factor enzyme 1	Homolog-of-gene-with-unknown-function
4.28226e-17	0.401879	0.091	0.042	6.67134e-13	aboral ectoderm	WHL22.647310	Sp-Nckx_1	sodium/potassium/calcium exchanger 3 (LOC100888839), partial mRNA	SPU_009526	transmembrane transport; integral component of membrane	Sodium/calcium exchanger protein	CalciumToolkit
4.99372e-17	0.423501	0.087	0.04	7.77971e-13	aboral ectoderm	WHL22.153742	SPU_003987	calcium-binding protein SPEC 2D (LOC762878), transcript variant X2, mRNA	SPU_003987	calcium ion binding	EF-hand domain pair; EF hand; EF-hand domain	Unclassified
1.83369e-16	0.414993	0.111	0.056	2.8567e-12	aboral ectoderm	WHL22.328830	Sp-Slsp_27	cuticle-degrading serine protease (LOC577978), mRNA	SPU_028935	proteolysis; serine-type endopeptidase activity	Subtilase family; Peptidase inhibitor I9	Metabolism_PeptidaseInhibitor
1.83738e-16	0.361717	0.048	0.017	2.86245e-12	aboral ectoderm	WHL22.22103	Sp-Timp4	uncharacterized LOC753842 (LOC753842), mRNA	SPU_008865	protein binding; metalloendopeptidase inhibitor activity	Tissue inhibitor of metalloproteinase; UNC-6/NTR/C345C module	Unclassified
2.23534e-16	0.267518	0.023	0.005	3.48244e-12	aboral ectoderm	WHL22.757481	Sp-Alox-4	allene oxide synthase-lipoxygenase protein (LOC585142), mRNA	SPU_010981	oxidation-reduction process; protein binding; oxidoreductase activity; acting on single donors withincorporation of molecular oxygen; incorporation of two atoms of oxygen; metal ion binding	Lipoxygenase; PLAT/LH2 domain; Embryo-specific protein 3, (ATS3)	Oxygenase
2.48662e-16	0.286386	0.032	0.009	3.87391e-12	aboral ectoderm	WHL22.376080	Sp-Z57	zinc finger protein 2 homolog (LOC100892146), mRNA	SPU_015767	nucleic acid binding; metal ion binding	Zinc-finger double domain; Zinc finger, C2H2 type; C2H2-type zinc finger	ZincFinger
2.53279e-16	0.277918	0.034	0.009	3.94584e-12	aboral ectoderm	WHL22.179051	Sp-Slsp_7	alkaline serine protease ver112 (LOC756280), mRNA	SPU_019106	proteolysis; serine-type endopeptidase activity	Subtilase family; Peptidase inhibitor I9	Metabolism_PeptidaseInhibitor
2.57309e-16	0.327994	0.047	0.016	4.00862e-12	aboral ectoderm	WHL22.106756	Sp-Acel_4	angiotensin-converting enzyme (LOC593528), transcript variant X1, mRNA	SPU_021351	proteolysis; metallopeptidase activity; peptidyl-dipeptidase activity; membrane	Angiotensin-converting enzyme	Metabolism_AminoAcid
2.61304e-16	0.385267	0.048	0.017	4.07085e-12	aboral ectoderm	WHL22.487460	WHL22.487460	phosphoenolpyruvate carboxykinase [GTP], mitochondrial-like (LOC753301), mRNA	NA	NA	NA	NA
2.6329e-16	0.346825	0.066	0.027	4.1018e-12	aboral ectoderm	WHL22.2869	SPU_000795	tctex1 domain-containing protein 2-like (LOC100887991), mRNA	SPU_000795	NA	Tctex-1 family	NA
5.12033e-16	0.498773	0.114	0.06	7.97696e-12	aboral ectoderm	WHL22.621478	Sp-Nfe2	nuclear factor erythroid 2 (Nfe2), transcript variant X1, mRNA	SPU_011174	regulation of transcription; DNA-templated; DNA binding; sequence-specific DNA binding transcription factoractivity; sequence-specific DNA binding; nucleus	bZIP Maf transcription factor; bZIP transcription factor	Defensome_ReceptorTF
6.38214e-16	0.335355	0.068	0.029	9.94274e-12	aboral ectoderm	WHL22.539631	Sp-Ebr1; Sp-Ebr1_2; Sp-Ebr1_1	egg bindin receptor 1 (ebr1), mRNA	SPU_000526; SPU_008369; SPU_018112	proteolysis; metalloendopeptidase activity; metallopeptidase activity; zinc ion binding	HYR domain; CUB domain; Thrombospondin type 1 domain	Oogenesis
8.43965e-16	0.263391	0.045	0.015	1.31481e-11	aboral ectoderm	WHL22.197865	SPU_016838	uncharacterized LOC100890855 (LOC100890855), mRNA	SPU_016838	calcium ion binding	EF-hand domain pair; EF-hand domain; EF hand	NA
8.44007e-16	0.382945	0.06	0.024	1.31488e-11	aboral ectoderm	WHL22.213534	Sp-5ht7	5-hydroxytryptamine receptor 1D-like (LOC581142), mRNA	SPU_005097	G-protein coupled receptor signaling pathway; G-protein coupled receptor activity; serotonin receptor activity; integral component of plasma membrane; integral component of membrane	7 transmembrane receptor (rhodopsin family); Serpentine type 7TM GPCR chemoreceptor Srsx; Serpentine type 7TM GPCR chemoreceptor Srx	CalciumToolkit
1.00848e-15	0.480535	0.21	0.139	1.57111e-11	aboral ectoderm	WHL22.286275	Sp-C19orf2	tumor protein p53-inducible nuclear protein 2 (LOC579670), mRNA	SPU_001722	protein folding; unfolded protein binding; prefoldin complex	DOR family; Prefoldin subunit; Prefoldin subunit	Chaperone
1.04779e-15	0.372008	0.066	0.028	1.63236e-11	aboral ectoderm	WHL22.215530	Sp-Abcb9C	NA	SPU_026178	transport; transmembrane transport; nucleotide binding; ATP binding; ATPase activity; nucleoside-triphosphatase activity; ATPase activity; coupled to transmembrane movement ofsubstances; integral component of membrane	ABC transporter transmembrane region; ABC transporter	Defensome_ABCTransporter
1.46844e-15	0.496716	0.164	0.101	2.28769e-11	aboral ectoderm	WHL22.473097	Sp-Spec2ce1-3	spec2c protein (spec2c), mRNA	SPU_014607	calcium ion binding	EF hand; EF-hand domain pair; EF hand	Unclassified
1.58061e-15	0.348155	0.046	0.016	2.46244e-11	aboral ectoderm	WHL22.535221	SPU_013882; Sp-Slc35e3_1	solute carrier family 35 member E3 (LOC594082), transcript variant X3, mRNA	SPU_013882; SPU_014615	NA	NA	NA
1.87287e-15	0.3754	0.069	0.03	2.91775e-11	aboral ectoderm	WHL22.531365	Sp-Hyal3	hyaluronidase (LOC582946), transcript variant X1, mRNA	SPU_026104	carbohydrate metabolic process; catalytic activity; hyalurononglucosaminidase activity	Hyaluronidase	Hydrolase
1.97114e-15	0.255944	0.04	0.013	3.07084e-11	aboral ectoderm	WHL22.547786	Sp-Slc16a9	monocarboxylate transporter 10 (LOC593504), transcript variant X1, mRNA	SPU_001211	transmembrane transport; integral component of membrane	Major Facilitator Superfamily	Metabolism_Carbohydrate
2.00127e-15	0.455329	0.126	0.07	3.11778e-11	aboral ectoderm	WHL22.325446	SPU_001866	metallothionein a (MTa), misc_RNA	SPU_001866	metal ion binding	Metallothionein	Defensome_MetalDetoxification
2.40542e-15	0.295471	0.033	0.009	3.74741e-11	aboral ectoderm	WHL22.52081	Sp-Wnt5	wingless-related MMTV integration site 5A (LOC578814), transcript variant X1, mRNA	SPU_026277	multicellular organismal development; Wnt signaling pathway; receptor binding; extracellular region	wnt family	Signaling_WntFzd
3.68378e-15	0.351413	0.052	0.02	5.73897e-11	aboral ectoderm	WHL22.616060	Sp-Scn5a	sodium channel protein type 4 subunit alpha B (LOC588616), mRNA	SPU_025997	ion transport; sodium ion transport; transmembrane transport; ion channel activity; voltage-gated sodium channel activity; voltage-gated sodium channel complex; membrane	Ion transport protein; Polycystin cation channel	Fertilization
4.0159e-15	0.301866	0.047	0.017	6.25638e-11	aboral ectoderm	WHL22.629000	SPU_018529	C-terminal-binding protein 1 (LOC575207), transcript variant X6, mRNA	SPU_018529	NA	Electron transfer DM13; DOMON domain	NA
4.01639e-15	0.300227	0.057	0.023	6.25714e-11	aboral ectoderm	WHL22.403334	Sp-Dcc/NeogL; SPU_025976	neogenin (LOC100891979), transcript variant X3, mRNA	SPU_025975; SPU_025976	acid phosphatase activity; protein binding	Fibronectin type III domain; Immunoglobulin I-set domain; Immunoglobulin domain	Adhesion_IgFN3Receptor
5.30545e-15	0.416281	0.073	0.033	8.26536e-11	aboral ectoderm	WHL22.491090	Sp-Llgl2; Sp-Sept3; Sp-Sept9L	neuronal-specific septin-3 (LOC590420), transcript variant X1, mRNA	SPU_015544; SPU_016514; SPU_017191	protein binding	LLGL2; WD domain, G-beta repeat; Lethal giant larvae(Lgl) like, C-terminal	Unclassified
1.3301e-14	0.361428	0.065	0.028	2.07217e-10	aboral ectoderm	WHL22.516816	Sp-Gal3st1_1	galactosylceramide sulfotransferase (LOC578919), transcript variant X5, misc_RNA	SPU_006168	biosynthetic process; galactosylceramide sulfotransferase activity; Golgi apparatus; integral component of membrane	Galactose-3-O-sulfotransferase	Transferase
1.47715e-14	0.36275	0.063	0.027	2.30125e-10	aboral ectoderm	WHL22.40723	Sp-Furin1	PC3-like endoprotease variant A (LOC581070), mRNA	SPU_010722	proteolysis; serine-type endopeptidase activity	Subtilase family; Proprotein convertase P-domain	Nervous_GrowthFactorRelated
2.07973e-14	0.408433	0.06	0.025	3.24001e-10	aboral ectoderm	WHL22.123763	Sp-Hypp_2238	uncharacterized LOC580499 (LOC580499), transcript variant X1, mRNA	SPU_015902	NA	NA	NA
2.48215e-14	0.448224	0.156	0.095	3.86693e-10	aboral ectoderm	WHL22.282796	Sp-MyX	myosin II (LOC373225), mRNA	SPU_021621	motor activity; myosin complex	Myosin tail	Cytoskeleton_Cytokinesis
3.18896e-14	0.422163	0.101	0.053	4.96808e-10	aboral ectoderm	WHL22.635688	Sp-Slc1; Sp-Slc1a2_1	excitatory amino acid transporter (LOC592280), transcript variant X1, mRNA	SPU_021063; SPU_024736	dicarboxylic acid transport; sodium:dicarboxylate symporter activity; membrane	Sodium:dicarboxylate symporter family	Metabolism_AminoAcid
3.28139e-14	0.262315	0.028	0.008	5.11207e-10	aboral ectoderm	WHL22.203656	WHL22.203656	phosphoenolpyruvate carboxykinase [GTP], mitochondrial-like (LOC752857), mRNA	NA	NA	NA	NA
4.07488e-14	0.254592	0.033	0.01	6.34826e-10	aboral ectoderm	WHL22.349363	Sp-Ugt1L_3	UDP-glucuronosyltransferase 1-6 (LOC593427), transcript variant X2, mRNA	SPU_012199	metabolic process; transferase activity; transferring hexosyl groups	UDP-glucoronosyl and UDP-glucosyl transferase; Glycosyltransferase family 28 C-terminal domain	Defensome_ReductiveConjugativeBiotransformation
4.76721e-14	0.335951	0.174	0.108	7.42684e-10	aboral ectoderm	WHL22.245681	Sp-Vtgn2	uncharacterized LOC590579 (LOC590579), mRNA	SPU_016052	lipid transport; lipid transporter activity	Lipoprotein amino terminal region; Domain of unknown function (DUF1943); von Willebrand factor type D domain	Oogenesis
5.8865e-14	0.259079	0.015	0.003	9.17058e-10	aboral ectoderm	WHL22.162209	Sp-AnL5	blastula protease 10-like (LOC105438784), mRNA	SPU_010948	proteolysis; metalloendopeptidase activity; metallopeptidase activity; zinc ion binding	Astacin (Peptidase family M12A); CUB domain	Metalloprotease
8.40452e-14	0.368488	0.06	0.025	1.30934e-09	aboral ectoderm	WHL22.759814	Sp-Kiaa1324L; SPU_023254	UPF0577 protein KIAA1324-like (LOC582318), mRNA	SPU_006145; SPU_023254	NA	Putative ephrin-receptor like	NA
9.64921e-14	0.36946	0.189	0.123	1.50325e-09	aboral ectoderm	WHL22.521303	Sp-Hypp_772	putative golgin subfamily A member 6-like protein 6 (LOC752318), partial mRNA	SPU_015150	NA	Lamina-associated polypeptide 1C (LAP1C)	NA
9.65523e-14	0.600075	0.174	0.115	1.50419e-09	aboral ectoderm	WHL22.318085	Sp-Jun	transcription factor AP-1-like (LOC588294), mRNA	SPU_003102	regulation of transcription; DNA-templated; DNA binding; sequence-specific DNA binding transcription factoractivity; sequence-specific DNA binding; nucleus	Jun-like transcription factor; bZIP transcription factor; bZIP Maf transcription factor	Signaling_TGFB_SmadInteract
1.3533e-13	0.39857	0.235	0.168	2.1083e-09	aboral ectoderm	WHL22.360754	WHL22.360754	annexin A7 (LOC100888638), mRNA	NA	NA	NA	NA
2.55462e-13	0.416312	0.248	0.181	3.97985e-09	aboral ectoderm	WHL22.647107	Sp-14-3-3_2	14-3-3-like protein (LOC583263), mRNA	SPU_022537	protein domain specific binding	14-3-3 protein	NA
4.05e-13	0.25984	0.031	0.01	6.3095e-09	aboral ectoderm	WHL22.246251	WHL22.246251	lysozyme 3 (LOC583374), mRNA	NA	NA	NA	NA
4.47418e-13	0.288484	0.039	0.014	6.97032e-09	aboral ectoderm	WHL22.511999	Sp-Muc19L	uncharacterized LOC582300 (LOC582300), mRNA	SPU_017267	NA	NA	NA
4.61372e-13	0.275098	0.032	0.01	7.18771e-09	aboral ectoderm	WHL22.107309	Sp-Dlx	distal-less homeobox (Dlx), mRNA	SPU_002815	regulation of transcription; DNA-templated; transcription regulatory region sequence-specific DNA binding; DNA binding; sequence-specific DNA binding transcription factoractivity; sequence-specific DNA binding; nucleus	Homeodomain	Nervous_Placode
5.009e-13	0.275662	0.042	0.015	7.80353e-09	aboral ectoderm	WHL22.470014	Sp-Pap2dL	lipid phosphate phosphatase-related protein type 1 (LOC585728), transcript variant X3, mRNA	SPU_016994	catalytic activity; membrane	PAP2 superfamily	Metabolism_Lipid
5.39262e-13	0.254609	0.034	0.011	8.40117e-09	aboral ectoderm	WHL22.535878	Sp-Hpse	heparanase (LOC586838), mRNA	SPU_004078	carbohydrate metabolic process; hydrolase activity; acting on glycosyl bonds; membrane	Glycosyl hydrolase family 79, N-terminal domain	Hydrolase
5.90472e-13	0.331143	0.057	0.025	9.19897e-09	aboral ectoderm	WHL22.310362	Sp-Lrp12L_2	uncharacterized LOC579734 (LOC579734), mRNA	SPU_000620	protein binding	Low-density lipoprotein receptor domain class A; CUB domain; SEA domain	Unclassified
6.63974e-13	0.319763	0.043	0.016	1.03441e-08	aboral ectoderm	WHL22.31773	Sp-Pkdcc	uncharacterized LOC580547 (LOC580547), transcript variant X1, mRNA	SPU_005883	protein phosphorylation; protein kinase activity; protein tyrosine kinase activity; ATP binding; transferase activity; transferring phosphorus-containing groups	Protein tyrosine kinase	NA
7.63511e-13	0.313904	0.064	0.029	1.18947e-08	aboral ectoderm	WHL22.344361	Sp-Flnc	filamin-B (LOC587438), mRNA	SPU_024599	actin binding; protein binding	Calponin homology (CH) domain; Filamin/ABP280 repeat; CAMSAP CH domain	Cytoskeleton_ActinBinding
9.45799e-13	0.298447	0.035	0.012	1.47346e-08	aboral ectoderm	WHL22.708139	Sp-Slc16a6L_7; Sp-Slc16a12L_17	monocarboxylate transporter 13 (LOC752949), transcript variant X1, mRNA	SPU_023272; SPU_023273	transmembrane transport; integral component of membrane	Major Facilitator Superfamily	Metabolism_Carbohydrate
1.13577e-12	0.349376	0.054	0.023	1.76942e-08	aboral ectoderm	WHL22.391924	Sp-Whrn	whirlin (LOC588790), transcript variant X1, mRNA	SPU_015412	protein binding	PDZ domain; PDZ domain; PDZ domain	Unclassified
1.33967e-12	0.424357	0.063	0.029	2.08707e-08	aboral ectoderm	WHL22.230515	Sp-Wdfy2	WD repeat and FYVE domain-containing protein 2 (LOC590921), transcript variant X1, mRNA	SPU_013913	protein binding; metal ion binding	WD domain, G-beta repeat; FYVE zinc finger	NA
1.48341e-12	0.253768	0.031	0.01	2.311e-08	aboral ectoderm	WHL22.27860	Sp-Ser_asprp	suppressor protein SRP40-like (LOC581983), mRNA	SPU_010283	NA	NA	NA
1.51894e-12	0.341439	0.059	0.026	2.36636e-08	aboral ectoderm	WHL22.211329	SPU_002860; SPU_012558	plexin domain-containing protein 2 (LOC588913), mRNA	SPU_002860; SPU_012558	multicellular organismal development; receptor activity; membrane	NA	DNA_Replication
1.65105e-12	0.272338	0.054	0.023	2.57217e-08	aboral ectoderm	WHL22.104803	SPU_021030	E3 ubiquitin-protein ligase MARCH11 (LOC588637), mRNA	SPU_021030	zinc ion binding	RING-variant domain	NA
2.50796e-12	0.377018	0.076	0.038	3.90715e-08	aboral ectoderm	WHL22.381253	SPU_008362; Sp-Daam1; SPU_023455	disheveled-associated activator of morphogenesis 1 (LOC583322), transcript variant X4, mRNA	SPU_008362; SPU_020925; SPU_023455	NA	NA	NA
2.57342e-12	0.45997	0.087	0.046	4.00913e-08	aboral ectoderm	WHL22.365631	Sp-Psap	proactivator polypeptide (LOC581297), mRNA	SPU_013454	lipid metabolic process; sphingolipid metabolic process; lysosome	Saposin-like type B, region 2; Saposin-like type B, region 1; Saposin A-type domain	Metabolism_LysosomalProtein
3.09762e-12	0.289267	0.038	0.014	4.82579e-08	aboral ectoderm	WHL22.583650	SPU_013664; Sp-LrpL_3	low-density lipoprotein receptor-related protein 1 (LOC582052), transcript variant X3, mRNA	SPU_013664; SPU_020978	NA	Coagulation Factor Xa inhibitory site	NA
3.43054e-12	0.288621	0.035	0.012	5.34444e-08	aboral ectoderm	WHL22.727306	WHL22.727306	uncharacterized LOC100889964 (LOC100889964), transcript variant X4, mRNA	NA	NA	NA	NA
3.83263e-12	0.412426	0.21	0.149	5.97086e-08	aboral ectoderm	WHL22.227277	SPU_011081; Sp-Sept6	septin-11 (LOC586062), mRNA	SPU_011081; SPU_023782	NA	NA	NA
9.66566e-12	0.363174	0.093	0.052	1.50581e-07	aboral ectoderm	WHL22.549324	SPU_007031	uncharacterized LOC577784 (LOC577784), transcript variant X1, mRNA	SPU_007031	NA	NA	NA
9.85143e-12	0.417964	0.127	0.078	1.53475e-07	aboral ectoderm	WHL22.521559	SPU_005034	calmodulin-2/4 (LOC585042), mRNA	SPU_005034	calcium ion binding	EF-hand domain pair; EF hand; EF-hand domain	Unclassified
1.08194e-11	0.337841	0.105	0.06	1.68555e-07	aboral ectoderm	WHL22.360757	Sp-Hypp_1662	uncharacterized LOC581802 (LOC581802), mRNA	SPU_006411	NA	NA	NA
1.32355e-11	0.343676	0.07	0.035	2.06196e-07	aboral ectoderm	WHL22.496053	Sp-Ust_3	uronyl 2-sulfotransferase (LOC588172), transcript variant X1, mRNA	SPU_024278	sulfotransferase activity; integral component of membrane	Sulfotransferase family	Adhesion_Proteoglycan
1.34153e-11	0.311712	0.035	0.013	2.08997e-07	aboral ectoderm	WHL22.330329	SPU_023835	otoferlin-like (LOC105443506), mRNA	SPU_023835	protein binding	Ferlin C-terminus	Unclassified
1.34863e-11	0.316002	0.051	0.022	2.10104e-07	aboral ectoderm	WHL22.313202	Sp-Gr	glyoxylate reductase/hydroxypyruvate reductase (LOC585161), transcript variant X1, mRNA	SPU_018383	metabolic process; oxidation-reduction process; oxidoreductase activity; acting on the CH-OH group of donors;NAD or NADP as acceptor; cofactor binding; NAD binding	D-isomer specific 2-hydroxyacid dehydrogenase, NAD binding domain; D-isomer specific 2-hydroxyacid dehydrogenase, catalytic domain; NAD binding domain of 6-phosphogluconate dehydrogenase	Metabolism_Energy
1.92069e-11	0.25839	0.057	0.026	2.99225e-07	aboral ectoderm	WHL22.641275	Sp-Gcnt2_1	sodium-dependent multivitamin transporter (LOC578787), transcript variant X2, mRNA	SPU_007407	acetylglucosaminyltransferase activity; membrane	Core-2/I-Branching enzyme	Metabolism_Carbohydrate
3.5693e-11	0.295077	0.047	0.02	5.56061e-07	aboral ectoderm	WHL22.16616	SPU_027717	lipopolysaccharide-induced tumor necrosis factor-alpha factor (LOC755737), mRNA	SPU_027717	NA	LITAF-like zinc ribbon domain	NA
3.97456e-11	0.260608	0.028	0.009	6.19196e-07	aboral ectoderm	WHL22.283717	Sp-Srcr72	scavenger receptor cysteine-rich type 1 protein M130 (LOC592984), mRNA	SPU_008836	scavenger receptor activity; membrane	Scavenger receptor cysteine-rich domain; Scavenger receptor cysteine-rich domain; Hepsin, SRCR domain	ImmuneSystem_Receptor_SRCR
4.09813e-11	0.429024	0.286	0.225	6.38448e-07	aboral ectoderm	WHL22.538507	Sp-Nfat	nuclear factor of activated T-cells 5 (LOC590859), transcript variant X2, mRNA	SPU_015908	regulation of transcription; DNA-templated; sequence-specific DNA binding transcription factor activity; protein binding; nucleus	Rel homology dimerisation domain; Rel homology DNA-binding domain; IPT/TIG domain	CalciumToolkit
6.42361e-11	0.341093	0.067	0.034	1.00073e-06	aboral ectoderm	WHL22.538376	Sp-AsrgL1	isoaspartyl peptidase/L-asparaginase (LOC100890184), transcript variant X1, mRNA	SPU_004004	hydrolase activity	Asparaginase	Metabolism_AminoAcid
8.8086e-11	0.399652	0.09	0.05	1.37229e-06	aboral ectoderm	WHL22.629412	Sp-Pkdh1l1	uncharacterized LOC581747 (LOC581747), mRNA	SPU_026381	NA	MYND finger	NA
1.50313e-10	0.299861	0.043	0.018	2.34173e-06	aboral ectoderm	WHL22.343472	Sp-Pkc1	protein kinase C (LOC754681), partial mRNA	SPU_010876	protein phosphorylation; intracellular signal transduction; protein kinase activity; protein serine/threonine kinase activity; protein kinase C activity; protein binding; ATP binding; zinc ion binding; transferase activity; transferring phosphorus-containing groups	Protein kinase domain; Protein tyrosine kinase; Phorbol esters/diacylglycerol binding domain (C1 domain)	CalciumToolkit
1.53696e-10	0.344263	0.093	0.053	2.39443e-06	aboral ectoderm	WHL22.361609	Sp-Fut4_1	glycoprotein 3-alpha-L-fucosyltransferase A-like (LOC582389), transcript variant X1, mRNA	SPU_017799	protein glycosylation; fucosyltransferase activity; membrane	Glycosyltransferase family 10 (fucosyltransferase) C-term; Fucosyltransferase, N-terminal	Transferase
2.57025e-10	0.365989	0.066	0.034	4.0042e-06	aboral ectoderm	WHL22.304979	Sp-Slc23a2_1	solute carrier family 23 member 1 (LOC100888792), mRNA	SPU_009217	transport; transmembrane transport; transporter activity; membrane	Permease family	Metabolism_Nucleotide
2.73203e-10	0.254601	0.026	0.009	4.25623e-06	aboral ectoderm	WHL22.75242	Sp-Hypp_1379; Sp-Abcb9B; Sp-Abcb9A	ATP-binding cassette sub-family B member 9 (LOC100892777), transcript variant X1, mRNA	SPU_002237; SPU_002238; SPU_026825	NA	NA	NA
3.16002e-10	0.327888	0.069	0.036	4.92299e-06	aboral ectoderm	WHL22.274862	Sp-Ptpmt1	phosphatidylglycerophosphatase and protein-tyrosine phosphatase 1 (LOC755068), mRNA	SPU_010017	protein dephosphorylation; cyclic nucleotide biosynthetic process; dephosphorylation; intracellular signal transduction; protein tyrosine phosphatase activity; protein tyrosine/serine/threonine phosphatase activity; phosphatase activity; phosphorus-oxygen lyase activity	Dual specificity phosphatase, catalytic domain; Adenylate and Guanylate cyclase catalytic domain	Phosphatase_Tyrosine
3.27353e-10	0.323087	0.075	0.04	5.09983e-06	aboral ectoderm	WHL22.242427	Sp-GliA	transcriptional activator GLI3 (LOC580371), mRNA	SPU_017627	nucleic acid binding; metal ion binding	Zinc finger, C2H2 type; Zinc-finger double domain; C2H2-type zinc finger	Nervous_Retinal
3.49307e-10	0.335567	0.076	0.041	5.44185e-06	aboral ectoderm	WHL22.562775	Sp-Pkhd1l1; Sp-FibcystL_1; SPU_026380	fibrocystin-L (LOC575549), mRNA	SPU_017495; SPU_023486; SPU_026380	protein binding	IPT/TIG domain; PA14 domain	NA
3.77809e-10	0.325301	0.072	0.038	5.88589e-06	aboral ectoderm	WHL22.384191	SPU_013933; SPU_013934; SPU_022374	fibropellin-2-like (LOC105442609), mRNA	SPU_013933; SPU_013934; SPU_022374	protein binding	EGF-like domain	Unclassified
4.5652e-10	0.40257	0.073	0.039	7.11213e-06	aboral ectoderm	WHL22.59533	Sp-Ucp3	mitochondrial uncoupling protein 2 (LOC577524), partial mRNA	SPU_021628	NA	Mitochondrial carrier protein	Metabolism_Energy
4.64249e-10	0.371975	0.17	0.117	7.23253e-06	aboral ectoderm	WHL22.502540	Sp-Slc29a1	microtubule-associated protein 10 (LOC100888354), mRNA	SPU_028310	transport; nucleoside transmembrane transporter activity; integral component of membrane	Nucleoside transporter	Metabolism_Nucleotide
5.75713e-10	0.315717	0.224	0.165	8.96903e-06	aboral ectoderm	WHL22.331108	Sp-Otof	otoferlin (LOC588154), mRNA	SPU_001799	protein binding	C2 domain; FerI (NUC094) domain	Unclassified
6.15446e-10	0.295857	0.062	0.031	9.58803e-06	aboral ectoderm	WHL22.57106	Sp-SoxF	transcription factor Sox-17-alpha-A-like (LOC587141), mRNA	SPU_014170	NA	HMG (high mobility group) box; HMG-box domain	TranscriptionFactor_Sox/HMG
7.38765e-10	0.262299	0.471	0.428	1.15092e-05	aboral ectoderm	WHL22.32905	Sp-Laptm4a	lysosomal-associated transmembrane protein 4A (LOC100890040), mRNA	SPU_023226	integral component of membrane	Golgi 4-transmembrane spanning transporter	NA
7.77622e-10	0.25395	0.044	0.019	1.21146e-05	aboral ectoderm	WHL22.737599	SPU_019176	uncharacterized LOC576238 (LOC576238), transcript variant X2, mRNA	SPU_019176	signal transduction; protein binding	Death domain	NA
8.45303e-10	0.393485	0.09	0.052	1.3169e-05	aboral ectoderm	WHL22.99593	Sp-Aldh1l1_1	mitochondrial 10-formyltetrahydrofolate dehydrogenase (LOC579576), transcript variant X1, mRNA	SPU_024622	metabolic process; oxidation-reduction process; oxidoreductase activity; oxidoreductase activity; acting on the aldehyde or oxogroup of donors; NAD or NADP as acceptor	Aldehyde dehydrogenase family	Defensome_OxidativeBiotransformation
8.56254e-10	0.502949	0.188	0.137	1.33396e-05	aboral ectoderm	WHL22.473637	Sp-122Kdsp_1	transmembrane protein 16 (tmem16), mRNA	SPU_023899	NA	Calcium-activated chloride channel; Dimerisation domain of Ca+-activated chloride-channel, anoctamin	Homolog-of-gene-with-unknown-function
8.93043e-10	0.37129	0.089	0.051	1.39127e-05	aboral ectoderm	WHL22.78876	Sp-Sema6; SPU_008674; Sp-Sema6_1	semaphorin-6D-like (LOC582531), transcript variant X6, mRNA	SPU_008673; SPU_008674; SPU_018452	protein binding	Sema domain	Adhesion_Neural
9.16262e-10	0.326891	0.374	0.332	1.42744e-05	aboral ectoderm	WHL22.1900	Sp-Sept7; SPU_020555; SPU_025521	septin-7 (LOC593733), transcript variant X2, misc_RNA	SPU_009849; SPU_020555; SPU_025521	cell cycle; GTP binding; septin complex	Septin; 50S ribosome-binding GTPase	Cytoskeleton_Cytokinesis
9.59312e-10	0.363096	0.243	0.189	1.49451e-05	aboral ectoderm	WHL22.204028	Sp-Rab10l; SPU_013928; Sp-Rab10	rab10 GTPase homolog SUrab10 (LOC373419), transcript variant X2, mRNA	SPU_002316; SPU_013928; SPU_013929	GTP catabolic process; signal transduction; small GTPase mediated signal transduction; protein transport; GTP binding; intracellular; membrane	Ras family; Ras of Complex, Roc, domain of DAPkinase	GTPase_Ras_Rab
9.81389e-10	0.342582	0.062	0.031	1.52891e-05	aboral ectoderm	WHL22.651595	WHL22.651595	cytochrome P450 10 (LOC576441), transcript variant X1, mRNA	NA	NA	NA	NA
9.84299e-10	0.335195	0.33	0.272	1.53344e-05	aboral ectoderm	WHL22.519961	Sp-Mnk2; Sp-Mnk	Mnk1 protein (LOC575733), transcript variant X1, mRNA	SPU_002418; SPU_006947	protein phosphorylation; protein kinase activity; protein serine/threonine kinase activity; ATP binding; transferase activity; transferring phosphorus-containing groups	Protein kinase domain; Protein tyrosine kinase	Kinase_CMGC
1.13543e-09	0.252176	0.037	0.015	1.76889e-05	aboral ectoderm	WHL22.684054	Sp-Aars_1; Sp-Aars	alanine--tRNA ligase, cytoplasmic (LOC589790), mRNA	SPU_001686; SPU_004893	tRNA aminoacylation; nucleotide binding; nucleic acid binding; ATP binding; ligase activity; forming aminoacyl-tRNA and relatedcompounds	DHHA1 domain; Threonyl and Alanyl tRNA synthetase second additional domain	Translation_AminoAcyl-tRNASynthetase
1.19433e-09	0.30708	0.066	0.035	1.86065e-05	aboral ectoderm	WHL22.739246	Sp-Nk2-2	NK2 homeodomain protein (NK2.2), mRNA	SPU_000756	regulation of transcription; DNA-templated; DNA binding; sequence-specific DNA binding transcription factoractivity; sequence-specific DNA binding; nucleus	Homeodomain	TranscriptionFactor_Homeo
1.21068e-09	0.289092	0.378	0.324	1.88612e-05	aboral ectoderm	WHL22.557380	Sp-Pdcd4	programmed cell death protein 4 (LOC575596), mRNA	SPU_003182	binding	MA3 domain	Translation_Initiation
1.39651e-09	0.292206	0.462	0.436	2.17562e-05	aboral ectoderm	WHL22.368800	SPU_021170; Sp-Bpnt1	TNF receptor-associated factor 6 (LOC580009), mRNA	SPU_021170; SPU_021171	NA	NA	NA
1.45647e-09	0.330775	0.06	0.03	2.26903e-05	aboral ectoderm	WHL22.659666	Sp-Asb5	ankyrin repeat and SOCS box protein 5 (LOC583825), transcript variant X2, mRNA	SPU_023368	intracellular signal transduction; protein binding	Ankyrin repeats (3 copies); Ankyrin repeat; Ankyrin repeats (many copies)	Unclassified
2.14076e-09	0.31405	0.056	0.028	3.3351e-05	aboral ectoderm	WHL22.122772	SPU_013423; SPU_014636	sodium- and chloride-dependent glycine transporter 2 (LOC587709), partial mRNA	SPU_013423; SPU_014636	neurotransmitter transport; neurotransmitter:sodium symporter activity; integral component of membrane	Sodium:neurotransmitter symporter family	NA
3.96741e-09	0.29019	0.162	0.111	6.18083e-05	aboral ectoderm	WHL22.310389	SPU_015016	proline-rich receptor-like protein kinase PERK12 (LOC590794), mRNA	SPU_015016	NA	NA	NA
4.46897e-09	0.435845	0.145	0.1	6.96221e-05	aboral ectoderm	WHL22.597887	Sp-Mpp5-2; Sp-Mpp5-3	MAGUK p55 subfamily member 5 (LOC579187), transcript variant X2, mRNA	SPU_004864; SPU_016842	protein binding	Guanylate kinase; PDZ domain; Variant SH3 domain	NA
7.94618e-09	0.343029	0.076	0.043	0.000123794	aboral ectoderm	WHL22.469402	Sp-Slc25a36	solute carrier family 25 member 36 (LOC100893731), mRNA	SPU_017892	transmembrane transport	Mitochondrial carrier protein	Metabolism_Energy
8.02694e-09	0.574277	0.403	0.39	0.000125052	aboral ectoderm	WHL22.475090	SPU_010342	uncharacterized LOC589921 (LOC589921), transcript variant X3, mRNA	SPU_010342	NA	NA	NA
1.02592e-08	0.365936	0.082	0.048	0.000159827	aboral ectoderm	WHL22.487423	Sp-Abca5	ATP-binding cassette sub-family A member 5 (LOC594802), mRNA	SPU_013906	nucleotide binding; ATP binding; ATPase activity; nucleoside-triphosphatase activity	ABC transporter; AAA domain, putative AbiEii toxin, Type IV TA system; ABC-2 family transporter protein	Defensome_ABCTransporter
1.25573e-08	0.25258	0.038	0.017	0.000195631	aboral ectoderm	WHL22.119578	Sp-Hypp_1571	collagen alpha-1(III) chain (LOC100888259), transcript variant X1, mRNA	SPU_005199	NA	NA	NA
1.29788e-08	0.293076	0.06	0.032	0.000202196	aboral ectoderm	WHL22.290886	Sp-Map1a/1B_Lc3L2	microtubule-associated proteins 1A/1B light chain 3C (LOC100889646), mRNA	SPU_008954	autophagy	Autophagy protein Atg8 ubiquitin like; Ubiquitin-like autophagy protein Apg12	Cytoskeleton_MicrotubuleAssociated
1.61863e-08	0.273746	0.58	0.567	0.000252166	aboral ectoderm	WHL22.348749	SPU_012828	ubiquitin-conjugating enzyme E2 L3 (LOC592882), mRNA	SPU_012828	acid-amino acid ligase activity	Ubiquitin-conjugating enzyme	Ubiquitin_Modifier
2.76246e-08	0.254851	0.047	0.023	0.000430363	aboral ectoderm	WHL22.541169	Sp-Ptk7	inactive tyrosine-protein kinase 7 (LOC590851), mRNA	SPU_010698	NA	Protein tyrosine kinase; Immunoglobulin domain; Immunoglobulin I-set domain	Kinase_TK
3.05454e-08	0.251243	0.073	0.041	0.000475867	aboral ectoderm	WHL22.36282	Sp-Chst14; Sp-Chst14_2	carbohydrate sulfotransferase 14-like (LOC594830), mRNA	SPU_015598; SPU_015822	carbohydrate biosynthetic process; sulfotransferase activity; integral component of membrane	Sulfotransferase family	Transferase
3.6009e-08	0.328191	0.081	0.049	0.000560984	aboral ectoderm	WHL22.377158	Sp-Tpd52L2	tumor protein D54 (LOC752681), transcript variant X3, mRNA	SPU_013450	NA	Tumour protein D52 family	Unclassified
4.61738e-08	0.267741	0.041	0.019	0.000719342	aboral ectoderm	WHL22.701929	SPU_001278; Sp-Slc12a8	solute carrier family 12 member 8 (LOC592204), transcript variant X2, mRNA	SPU_001278; SPU_001279	NA	NA	NA
7.23419e-08	0.570925	0.201	0.158	0.00112701	aboral ectoderm	WHL22.734435	Sp-Glyt_2; Sp-Glyt_4	sodium- and chloride-dependent glycine transporter 1 (LOC575259), mRNA	SPU_007205; SPU_008246	neurotransmitter transport; neurotransmitter:sodium symporter activity; integral component of membrane	Sodium:neurotransmitter symporter family	NA
1.12365e-07	0.274921	0.203	0.153	0.00175053	aboral ectoderm	WHL22.51238	Sp-Glyt_3	sodium- and chloride-dependent glycine transporter 1 (LOC577731), transcript variant X2, mRNA	SPU_009356	neurotransmitter transport; neurotransmitter:sodium symporter activity; integral component of membrane	Sodium:neurotransmitter symporter family	NA
1.16894e-07	0.283395	0.15	0.105	0.0018211	aboral ectoderm	WHL22.555433	Sp-Lamb2	laminin subunit beta-1 (LOC582206), mRNA	SPU_003822	NA	NA	Adhesion_Laminin
1.62015e-07	0.312914	0.115	0.077	0.00252403	aboral ectoderm	WHL22.49657	Sp-Fimbph	fimbrin-like (LOC586505), mRNA	SPU_000091	actin binding; calcium ion binding; protein binding	Calponin homology (CH) domain; EF hand; EF-hand domain	NA
1.68778e-07	0.29701	0.044	0.022	0.00262939	aboral ectoderm	WHL22.755964	SPU_006157; Sp-Itpkb; Sp-Itpkc	inositol-trisphosphate 3-kinase B (LOC590949), transcript variant X2, mRNA	SPU_006157; SPU_020176; SPU_024229	inositol-1;4;5-trisphosphate 3-kinase activity	NA	NA
1.94583e-07	0.339136	0.133	0.094	0.00303141	aboral ectoderm	WHL22.32425	SPU_007777	microsomal glutathione S-transferase 1 (LOC587704), mRNA	SPU_007777	NA	MAPEG family	Defensome_ReductiveConjugativeBiotransformation
2.65204e-07	0.821211	0.419	0.418	0.00413162	aboral ectoderm	WHL22.417635	Sp-Spec1	Spec 1a protein (SPEC1), mRNA	SPU_007452	calcium ion binding	EF hand; EF-hand domain pair; EF-hand domain	Unclassified
3.96412e-07	0.272504	0.053	0.029	0.00617571	aboral ectoderm	WHL22.477152	Sp-Hypp_210	uncharacterized LOC100891701 (LOC100891701), transcript variant X3, mRNA	SPU_024175	protein binding	MANEC domain; Low-density lipoprotein receptor domain class A	Unclassified
4.37178e-07	0.282216	0.089	0.056	0.00681079	aboral ectoderm	WHL22.225202	SPU_006220	fibropellin-3 (LOC582441), mRNA	SPU_006220	calcium ion binding; protein binding	EGF-like domain; Human growth factor-like EGF; EGF-like domain	Unclassified
7.85951e-07	0.266471	0.314	0.277	0.0122443	aboral ectoderm	WHL22.279133	SPU_005324	glycine N-methyltransferase (LOC589953), mRNA	SPU_005324	glycine N-methyltransferase activity	Methyltransferase domain; Methyltransferase domain; Methyltransferase domain	NA
7.87441e-07	0.295196	0.18	0.139	0.0122675	aboral ectoderm	WHL22.652302	Sp-Qki	protein quaking-A (LOC581568), transcript variant X1, mRNA	SPU_009086	RNA binding	Homodimerisation region of STAR domain protein; KH domain	NA
8.61045e-07	0.334897	0.116	0.08	0.0134142	aboral ectoderm	WHL22.468365	Sp-FoxJ1	forkhead transcription factor J1 (FoxJ1), mRNA	SPU_027969	regulation of transcription; DNA-templated; sequence-specific DNA binding transcription factor activity; sequence-specific DNA binding	Forkhead domain	Nervous_TF
1.37689e-06	0.410092	0.054	0.031	0.0214505	aboral ectoderm	WHL22.500215	SPU_023163	AAC-rich mRNA clone AAC4 protein (LOC592600), mRNA	SPU_023163	NA	NA	NA
1.77787e-06	0.303608	0.102	0.069	0.0276974	aboral ectoderm	WHL22.104525	Sp-Soxb2	transcription factor SoxB2 (SoxB2), mRNA	SPU_025113	NA	HMG (high mobility group) box; HMG-box domain; SOX transcription factor	Nervous_TF
2.04805e-06	0.305291	0.075	0.047	0.0319066	aboral ectoderm	WHL22.472040	SPU_007578	tetraspanin-9 (LOC581670), mRNA	SPU_007578	integral component of membrane	Tetraspanin family	Transmembrane
2.16587e-06	0.352246	0.147	0.111	0.0337421	aboral ectoderm	WHL22.678767	Sp-Rab2	ras-related protein Rab-2A (LOC577200), transcript variant X1, mRNA	SPU_019458	GTP catabolic process; intracellular protein transport; nucleocytoplasmic transport; signal transduction; small GTPase mediated signal transduction; protein transport; GTPase activity; GTP binding; intracellular; membrane	Ras family; Ras of Complex, Roc, domain of DAPkinase; ADP-ribosylation factor family	GTPase_Ras_Rab
2.41616e-06	0.253155	0.043	0.022	0.0376414	aboral ectoderm	WHL22.292545	WHL22.292545	neurogenic locus notch homolog protein 1 (LOC583013), mRNA	NA	NA	NA	NA
2.58682e-06	0.259639	0.048	0.027	0.0403001	aboral ectoderm	WHL22.143793	Sp-Unk_54	NA	SPU_012032	protein binding	Leucine rich repeat; Leucine Rich repeats (2 copies); Fibronectin type III domain	Adhesion_IgFN3Receptor
2.90477e-06	0.259698	0.078	0.05	0.0452534	aboral ectoderm	WHL22.327350	Sp-Nidogen	nidogen-1 (LOC586685), transcript variant X1, mRNA	SPU_016055	calcium ion binding; protein binding	G2F domain; EGF domain; Low-density lipoprotein receptor repeat class B	Adhesion_ECM
3.13216e-06	0.384441	0.145	0.11	0.0487959	aboral ectoderm	WHL22.450320	Sp-Oma	zinc finger protein 36, C3H1 type-like 1 (LOC577494), mRNA	SPU_024449	metal ion binding	Zinc finger C-x8-C-x5-C-x3-H type (and similar); Tis11B like protein, N terminus; Zinc finger domain	Fertilization
3.67057e-06	0.318165	0.032	0.016	0.0571838	aboral ectoderm	WHL22.577814	WHL22.577814	protein SpAN (LOC752794), mRNA	NA	NA	NA	NA
4.90062e-06	0.263578	0.327	0.294	0.0763467	aboral ectoderm	WHL22.668018	SPU_013383	UBA-like domain-containing protein 1 (LOC580569), mRNA	SPU_013383	protein binding	UBA-like domain	NA
5.22212e-06	0.262706	0.158	0.119	0.0813554	aboral ectoderm	WHL22.643666	SPU_021006; Sp-Aqp1; Sp-Aqp_2	lens fiber major intrinsic protein (LOC594743), mRNA	SPU_021006; SPU_021387; SPU_021388	transport; transporter activity; membrane	Major intrinsic protein	NA
6.10041e-06	0.297123	0.041	0.022	0.0950383	aboral ectoderm	WHL22.678769	Sp-Fam46c	protein FAM46C-like (LOC594195), mRNA	SPU_013612	NA	Nucleotidyltransferase	Homolog-of-gene-with-unknown-function
6.86677e-06	0.314132	0.073	0.047	0.106977	aboral ectoderm	WHL22.369871	Sp-Thtpa; SPU_028376	thiamine-triphosphatase (LOC100893163), ncRNA	SPU_001570; SPU_028376	thiamine metabolic process; thiamin-triphosphatase activity	CYTH domain	Unclassified
9.21946e-06	0.297777	0.07	0.045	0.14363	aboral ectoderm	WHL22.579194	Sp-Smad6/7; Sp-Smad6/7_1	mothers against decapentaplegic homolog 6 (LOC593676), mRNA	SPU_001998; SPU_018246	regulation of transcription; DNA-templated; protein binding; intracellular	MH2 domain	Signaling_TGFB_SmadRelated
9.9628e-06	0.255714	0.061	0.038	0.155211	aboral ectoderm	WHL22.382468	Sp-Reeler/Egf/Cub_1	fibropellin-3 (LOC100891955), mRNA	SPU_026550	calcium ion binding; protein binding	EGF-like domain; Human growth factor-like EGF; Calcium-binding EGF domain	Unclassified
1.14052e-05	0.276158	0.049	0.028	0.177681	aboral ectoderm	WHL22.567329	SPU_002059	uncharacterized LOC581393 (LOC581393), mRNA	SPU_002059	NA	NA	NA
1.69718e-05	0.273677	0.054	0.033	0.264403	aboral ectoderm	WHL22.84419	Sp-Hypp_3004	interferon regulatory factor 2-binding protein-like (LOC579269), mRNA	SPU_008952	NA	Interferon regulatory factor 2-binding protein zinc finger	NA
1.7161e-05	0.341375	0.112	0.082	0.267351	aboral ectoderm	WHL22.769600	Sp-Pmca	sperm plasma membrane calcium transporting ATPase (PMCA), transcript variant X5, mRNA	SPU_021303	cation transport; calcium ion transmembrane transport; nucleotide binding; calcium-transporting ATPase activity; ATP binding; cation-transporting ATPase activity; metal ion binding; membrane; integral component of membrane	Cation transporting ATPase, C-terminus; E1-E2 ATPase; Plasma membrane calcium transporter ATPase C terminal	CalciumToolkit
1.72e-05	0.268183	0.054	0.032	0.267958	aboral ectoderm	WHL22.389481	Sp-Hypp_912	proteoglycan 4 (LOC100892783), transcript variant X2, mRNA	SPU_018255	zinc ion binding	LIM domain	NA
2.0175e-05	0.273357	0.092	0.064	0.314306	aboral ectoderm	WHL22.45548	SPU_016613; SPU_021343	uncharacterized LOC575348 (LOC575348), mRNA	SPU_016613; SPU_021343	NA	NA	NA
2.10069e-05	0.289511	0.074	0.049	0.327266	aboral ectoderm	WHL22.309559	Sp-Rhop1	rho-related protein racB (LOC589445), mRNA	SPU_018101	GTP catabolic process; signal transduction; small GTPase mediated signal transduction; protein transport; GTP binding; intracellular; membrane	Ras family; Ras of Complex, Roc, domain of DAPkinase	GTPase_Ras_Rho
3.44113e-05	0.263843	0.063	0.041	0.536094	aboral ectoderm	WHL22.241388	Sp-Hypp_2654	serine/threonine-protein phosphatase 1 regulatory subunit 10 (LOC588524), transcript variant X1, mRNA	SPU_023186	NA	PH domain	Hydrolase
3.97523e-05	0.257904	0.045	0.026	0.619302	aboral ectoderm	WHL22.144338	Sp-Tmem26L	uncharacterized LOC100893465 (LOC100893465), mRNA	SPU_025046	NA	Transmembrane protein 26	Transmembrane
5.76463e-05	0.380172	0.068	0.045	0.898072	aboral ectoderm	WHL22.509140	Sp-Tsc22d2	protein bunched, class 2/F/G isoform (LOC589987), transcript variant X2, mRNA	SPU_022435	regulation of transcription; DNA-templated; sequence-specific DNA binding transcription factor activity	TSC-22/dip/bun family	Unclassified
7.70243e-05	0.304194	0.119	0.09	1	aboral ectoderm	WHL22.480593	Sp-Furin_1	ATP-binding cassette sub-family B member 9-like (LOC105445745), mRNA	SPU_028030	proteolysis; transport; transmembrane transport; serine-type endopeptidase activity; ATP binding; ATPase activity; coupled to transmembrane movement ofsubstances; integral component of membrane	Proprotein convertase P-domain; Subtilase family; ABC transporter transmembrane region	Signaling_TGFB_Modulator
9.66826e-05	0.348063	0.092	0.067	1	aboral ectoderm	WHL22.268331	Sp-Slc25a1	tricarboxylate transport protein, mitochondrial (LOC576892), transcript variant X1, mRNA	SPU_006452	NA	Mitochondrial carrier protein	Metabolism_Energy
0.000107503	0.268793	0.047	0.029	1	aboral ectoderm	WHL22.430782	Sp-Cpt1	carnitine O-palmitoyltransferase 1, liver isoform (LOC577222), mRNA	SPU_011806	transferase activity; transferring acyl groups	Choline/Carnitine o-acyltransferase	Transferase
0.000167863	0.272907	0.118	0.09	1	aboral ectoderm	WHL22.194110	SPU_002896	laminin subunit gamma-1 (LOC587252), mRNA	SPU_002896	NA	NA	NA
0.000184189	0.310871	0.189	0.16	1	aboral ectoderm	WHL22.479724	Sp-Cobll	titin (LOC589781), transcript variant X4, mRNA	SPU_007437	NA	Cordon-bleu ubiquitin-like domain	Transferase
0.000188937	0.261514	0.092	0.068	1	aboral ectoderm	WHL22.541744	Sp-Sc4mol_1	C-4 methylsterol oxidase-like (LOC582397), mRNA	SPU_011656	fatty acid biosynthetic process; oxidation-reduction process; iron ion binding; oxidoreductase activity	Fatty acid hydroxylase superfamily	Metabolism_Lipid
0.000195562	0.310641	0.16	0.133	1	aboral ectoderm	WHL22.51605	Sp-Cyhr1	cysteine and histidine-rich protein 1 (LOC579546), mRNA	SPU_020505	protein ubiquitination; ubiquitin-protein ligase activity; protein binding; zinc ion binding	Zinc finger, C3HC4 type (RING finger); Seven in absentia protein family	NA
0.000542875	0.322964	0.13	0.105	1	aboral ectoderm	WHL22.470027	SPU_018931; Sp-AhnakL	vesicle-associated protein-like (LOC580388), transcript variant X2, mRNA	SPU_018931; SPU_018932	NA	NA	NA
0.000938872	0.268208	0.088	0.066	1	aboral ectoderm	WHL22.445685	SPU_024442	uncharacterized LOC579536 (LOC579536), ncRNA	SPU_024442	NA	NA	NA
0.0017669	0.267122	0.081	0.062	1	aboral ectoderm	WHL22.228100	SPU_014145	ubiquitin-conjugating enzyme E2 H (LOC578542), mRNA	SPU_014145	acid-amino acid ligase activity	Ubiquitin-conjugating enzyme	Ubiquitin_Modifier
0.00217828	0.290995	0.211	0.191	1	aboral ectoderm	WHL22.135677	Sp-Flot1	flotillin-1 (LOC586889), mRNA	SPU_019691	NA	SPFH domain / Band 7 family; Flotillin	Unclassified
0.00256103	0.265387	0.1	0.08	1	aboral ectoderm	WHL22.705061	WHL22.705061	scavenger receptor cysteine-rich type 1 protein M130 (LOC764257), transcript variant X2, mRNA	NA	NA	NA	NA
0.00892563	0.277604	0.223	0.21	1	aboral ectoderm	WHL22.603782	Sp-Calpain	calpain-9 (LOC575876), transcript variant X1, mRNA	SPU_023461	proteolysis; calcium-dependent cysteine-type endopeptidase activity; calcium ion binding; intracellular	Calpain family cysteine protease; Calpain large subunit, domain III; EF-hand domain	CalciumToolkit
0	2.29165	0.575	0.009	0	lower oral ectoderm	WHL22.110532	Sp-Ese	uncharacterized LOC582205 (LOC582205), transcript variant X1, mRNA	SPU_024903	regulation of transcription; DNA-templated; sequence-specific DNA binding transcription factor activity; sequence-specific DNA binding	Ets-domain	TranscriptionFactor_Ets
3.22746e-101	2.40908	0.658	0.063	5.02806e-97	lower oral ectoderm	WHL22.645090	Sp-Fam49b	protein FAM49B (LOC593978), transcript variant X3, mRNA	SPU_003652	NA	Protein of unknown function (DUF1394)	Homolog-of-gene-with-unknown-function
6.09671e-101	2.48221	0.616	0.055	9.49807e-97	lower oral ectoderm	WHL22.69670	SPU_022757	cell wall integrity protein scw1 (LOC762862), transcript variant X1, mRNA	SPU_022757	nucleotide binding; nucleic acid binding	RNA recognition motif. (a.k.a. RRM, RBD, or RNP domain)	Unclassified
2.06333e-96	1.60577	0.205	0.006	3.21446e-92	lower oral ectoderm	WHL22.615034	Sp-Cyfip2; SPU_022438	cytoplasmic FMR1-interacting protein 2 (LOC578768), transcript variant X6, mRNA	SPU_007722; SPU_022438	NA	Cytoplasmic Fragile-X interacting family; Protein of unknown function (DUF1394)	Unclassified
3.43876e-85	1.4144	0.233	0.009	5.35725e-81	lower oral ectoderm	WHL22.600327	Sp-Pgrp2; Sp-Kirrel2L_1	uncharacterized LOC100892373 (LOC100892373), mRNA	SPU_007946; SPU_007947	peptidoglycan catabolic process; zinc ion binding; N-acetylmuramoyl-L-alanine amidase activity	N-acetylmuramoyl-L-alanine amidase	ImmuneSystem_Receptor_OtherPRR
9.75136e-63	2.57223	0.808	0.169	1.51916e-58	lower oral ectoderm	WHL22.580443	SPU_027438	uncharacterized LOC578221 (LOC578221), mRNA	SPU_027438	NA	NA	NA
4.41524e-51	1.90002	0.534	0.079	6.87851e-47	lower oral ectoderm	WHL22.618634	Sp-Slc31a1	high affinity copper uptake protein 1 (LOC580143), mRNA	SPU_000048	copper ion transmembrane transport; copper ion transmembrane transporter activity; integral component of membrane	Ctr copper transporter family	Metabolism_InorganicIon
2.52933e-48	1.56681	0.37	0.039	3.94045e-44	lower oral ectoderm	WHL22.384467	Sp-Advph; SPU_001875	advillin (adv), mRNA	SPU_001874; SPU_001875	cytoskeleton organization; actin binding	Villin headpiece domain; Gelsolin repeat	NA
6.92046e-46	2.23484	0.918	0.352	1.07814e-41	lower oral ectoderm	WHL22.34872	Sp-Hypp_885	protein DD3-3 (LOC577037), mRNA	SPU_017630	NA	NA	NA
1.85801e-45	2.11328	0.863	0.278	2.89459e-41	lower oral ectoderm	WHL22.35582	Sp-Hypp_887	protein DD3-3 (LOC580128), mRNA	SPU_017641	NA	NA	NA
3.86786e-45	0.416854	0.055	0.001	6.02575e-41	lower oral ectoderm	WHL22.738218	SPU_000809; Sp-Adcy10	adenylate cyclase type 10 (LOC581493), mRNA	SPU_000809; SPU_025630	cyclic nucleotide biosynthetic process; intracellular signal transduction; phosphorus-oxygen lyase activity	NA	NA
7.67207e-43	1.41596	0.26	0.022	1.19523e-38	lower oral ectoderm	WHL22.72680	Sp-Fat; Sp-FatL2	protocadherin Fat 4 (LOC580453), transcript variant X1, mRNA	SPU_001454; SPU_009073	cell adhesion; homophilic cell adhesion; calcium ion binding; plasma membrane; membrane	Cadherin domain; Cadherin-like; Cadherin-like	Adhesion_Cadherin
8.13469e-43	1.12701	0.164	0.009	1.2673e-38	lower oral ectoderm	WHL22.13574	Sp-Pgrp3; Sp-Pgrp4	peptidoglycan recognition protein 3 (LOC591777), mRNA	SPU_000222; SPU_003882	peptidoglycan catabolic process; zinc ion binding; N-acetylmuramoyl-L-alanine amidase activity	N-acetylmuramoyl-L-alanine amidase	ImmuneSystem_Receptor_OtherPRR
1.08067e-42	1.81406	0.63	0.127	1.68357e-38	lower oral ectoderm	WHL22.406692	Sp-Fjx1l	four-jointed box protein 1 (LOC576174), transcript variant X3, mRNA	SPU_018848	NA	NA	NA
3.78747e-40	1.53274	0.74	0.178	5.9005e-36	lower oral ectoderm	WHL22.747266	Sp-Glur1	glutamate receptor 1 (LOC587837), mRNA	SPU_027899	transport; ion transport; receptor activity; ionotropic glutamate receptor activity; transporter activity; ion channel activity; extracellular-glutamate-gated ion channel activity; membrane	Ligand-gated ion channel; Receptor family ligand binding region; Ligated ion channel L-glutamate- and glycine-binding site	NA
9.69443e-36	0.928439	0.137	0.007	1.5103e-31	lower oral ectoderm	WHL22.212013	Sp-Chst11_10	carbohydrate sulfotransferase 11 (LOC752230), mRNA	SPU_010756	carbohydrate biosynthetic process; sulfotransferase activity; integral component of membrane	Sulfotransferase family	Transferase
3.8691e-35	1.56616	0.329	0.041	6.02766e-31	lower oral ectoderm	WHL22.339658	Sp-Rbm35A	epithelial splicing regulatory protein 2 (LOC588026), transcript variant X1, mRNA	SPU_014611	nucleotide binding; nucleic acid binding	RNA recognition motif. (a.k.a. RRM, RBD, or RNP domain)	Unclassified
2.08461e-34	1.33556	1	0.964	3.24762e-30	lower oral ectoderm	WHL22.184359	Sp-CskaI; Sp-CskaIIa; Sp-CplcaIIb	cytoplasmic actin I (CyI), transcript variant X1, mRNA	SPU_009481; SPU_009482; SPU_009483	NA	Actin	Cytoskeleton_Actin
3.94465e-34	0.783608	0.123	0.006	6.14536e-30	lower oral ectoderm	WHL22.684039	Sp-Ptpn6/11	tyrosine-protein phosphatase corkscrew (LOC578886), mRNA	SPU_013810	protein dephosphorylation; dephosphorylation; protein tyrosine phosphatase activity; protein binding; phosphatase activity	Protein-tyrosine phosphatase; SH2 domain	ImmuneSystem_Signal
3.96663e-34	1.01476	0.178	0.013	6.17961e-30	lower oral ectoderm	WHL22.102285	Sp-Glyt_5; Sp-Slc6a5_5	sodium- and chloride-dependent neutral and basic amino acid transporter B(0+) (LOC592693), transcript variant X3, mRNA	SPU_008617; SPU_012780	neurotransmitter transport; neurotransmitter:sodium symporter activity; integral component of membrane	Sodium:neurotransmitter symporter family	NA
1.03351e-33	0.359761	0.041	0.001	1.6101e-29	lower oral ectoderm	WHL22.330549	Sp-Rptp_mu_2	receptor-type tyrosine-protein phosphatase T (LOC100890753), transcript variant X2, mRNA	SPU_025766	protein dephosphorylation; dephosphorylation; protein tyrosine phosphatase activity; protein binding; phosphatase activity	Protein-tyrosine phosphatase	Phosphatase_Tyrosine
7.74977e-33	1.78329	0.438	0.078	1.20734e-28	lower oral ectoderm	WHL22.49657	Sp-Fimbph	fimbrin-like (LOC586505), mRNA	SPU_000091	actin binding; calcium ion binding; protein binding	Calponin homology (CH) domain; EF hand; EF-hand domain	NA
3.90551e-32	0.907398	0.137	0.008	6.08439e-28	lower oral ectoderm	WHL22.256346	WHL22.256346	uncharacterized LOC100891976 (LOC100891976), transcript variant X2, mRNA	NA	NA	NA	NA
2.5738e-31	1.76455	1	0.784	4.00972e-27	lower oral ectoderm	WHL22.173564	SPU_025449	epidermal growth factor-related protein (EGF2), mRNA	SPU_025449	calcium ion binding; protein binding	Calcium-binding EGF domain; EGF-like domain; EGF domain	Unclassified
2.10919e-30	1.59907	0.781	0.273	3.28591e-26	lower oral ectoderm	WHL22.714762	SPU_007318; Sp-Msi1; SPU_022512	RNA-binding protein Musashi homolog 2 (LOC763497), transcript variant X9, mRNA	SPU_007318; SPU_020274; SPU_022512	nucleotide binding	NA	NA
4.74271e-30	0.988874	0.137	0.009	7.38867e-26	lower oral ectoderm	WHL22.510906	Sp-Ncf2l; SPU_024754	titin (LOC576602), transcript variant X1, mRNA	SPU_004261; SPU_024754	protein binding	Tetratricopeptide repeat; Tetratricopeptide repeat; Tetratricopeptide repeat	Unclassified
2.91069e-29	1.08471	0.137	0.009	4.53456e-25	lower oral ectoderm	WHL22.754202	Sp-Pi3kp110b	phosphatidylinositol 4,5-bisphosphate 3-kinase catalytic subunit beta isoform (LOC588097), mRNA	SPU_022717	phosphatidylinositol phosphorylation; phosphatidylinositol-mediated signaling; binding; protein binding; transferase activity; transferring phosphorus-containing groups; phosphotransferase activity; alcohol group as acceptor	Phosphatidylinositol 3- and 4-kinase; Phosphoinositide 3-kinase family, accessory domain (PIK domain); PI3-kinase family, p85-binding domain	CalciumToolkit
4.40105e-27	0.36818	0.041	0.001	6.8564e-23	lower oral ectoderm	WHL22.619971	Sp-Cybb	cytochrome b-245 heavy chain (LOC757329), mRNA	SPU_018924	oxidation-reduction process; oxidoreductase activity; membrane	Ferric reductase NAD binding domain; Ferric reductase like transmembrane component; FAD-binding domain	NA
4.87135e-27	0.272135	0.041	0.001	7.58907e-23	lower oral ectoderm	WHL22.457785	Sp-Ship	phosphatidylinositol 3,4,5-trisphosphate 5-phosphatase 2 (LOC757115), mRNA	SPU_020966	phosphatidylinositol dephosphorylation; protein binding	Endonuclease/Exonuclease/phosphatase family; SAM domain (Sterile alpha motif); SAM domain (Sterile alpha motif)	NA
5.87163e-25	1.0302	1	0.985	9.14741e-21	lower oral ectoderm	WHL22.424734	Sp-Thymbh	thymosin beta (LOC373484), misc_RNA	SPU_026031	cytoskeleton organization; actin cytoskeleton organization; sequestering of actin monomers; actin binding; cytoplasm	Thymosin beta-4 family	Unclassified
1.86857e-24	1.21451	0.205	0.023	2.91104e-20	lower oral ectoderm	WHL22.721840	Sp-Dnm2	dynamin-1 (LOC765161), mRNA	SPU_002961	GTPase activity; GTP binding	Dynamin family; Dynamin central region; Dynamin GTPase effector domain	GTPase_Dynamin_Classical
7.33072e-24	1.20718	0.164	0.016	1.14205e-19	lower oral ectoderm	WHL22.255798	Sp-Ptpd_1	receptor-type tyrosine-protein phosphatase epsilon (LOC585698), mRNA	SPU_022282	protein dephosphorylation; dephosphorylation; protein tyrosine phosphatase activity; phosphatase activity	Protein-tyrosine phosphatase; Tyrosine phosphatase family; Dual specificity phosphatase, catalytic domain	NA
1.01744e-23	1.30616	0.301	0.05	1.58507e-19	lower oral ectoderm	WHL22.603242	Sp-Sim_wsk_ald_syn_ph; Sp-Wasl	neural Wiskott-Aldrich syndrome protein (LOC592391), transcript variant X2, mRNA	SPU_003194; SPU_025635	actin filament organization; actin binding	WH2 motif; P21-Rho-binding domain	Cytoskeleton_ActinBinding
1.37941e-23	1.46867	0.521	0.145	2.14899e-19	lower oral ectoderm	WHL22.84136	Sp-Arp3ph	actin-related protein 3 (LOC576708), mRNA	SPU_010631	NA	Actin; MreB/Mbl protein	Cytoskeleton_ActinRelated
1.08923e-22	0.753145	0.096	0.006	1.69691e-18	lower oral ectoderm	WHL22.4643	SPU_028241	annexin A7 (LOC764615), mRNA	SPU_028241	NA	NA	NA
1.99748e-22	1.50375	0.521	0.148	3.11187e-18	lower oral ectoderm	WHL22.60330	Sp-SmtnL_2	smoothelin-like protein 1 (LOC590168), mRNA	SPU_021845	protein binding	Calponin homology (CH) domain	NA
2.43885e-22	1.60335	0.562	0.186	3.79949e-18	lower oral ectoderm	WHL22.595492	Sp-Rhogdi	Rho GDP dissociation inhibitor (GDI) (LOC576198), transcript variant X1, mRNA	SPU_025771	Rho GDP-dissociation inhibitor activity; cytoplasm	RHO protein GDP dissociation inhibitor	GTPase_RhoRegulator_RhoGDI
3.19738e-21	0.969974	0.192	0.023	4.98119e-17	lower oral ectoderm	WHL22.97143	Sp-Colf_3	NA	SPU_011736	NA	Collagen triple helix repeat (20 copies)	Adhesion_Collagen
5.87364e-21	0.553124	0.082	0.005	9.15055e-17	lower oral ectoderm	WHL22.586912	Sp-Fn3_11; Sp-Fn3_25; Sp-Fn3rch	fibronectin (LOC763365), mRNA	SPU_000736; SPU_009943; SPU_010374	protein binding	Fibronectin type III domain; Glycosyl hydrolase family 36 C-terminal domain; Arylsulfotransferase Ig-like domain	Adhesion_Atypical
5.82118e-20	0.866927	0.178	0.021	9.06882e-16	lower oral ectoderm	WHL22.17916	SPU_013322	steroidogenic acute regulatory protein, mitochondrial-like (LOC105436740), mRNA	SPU_013322	lipid binding	START domain	NA
7.51148e-19	1.3473	0.37	0.089	1.17021e-14	lower oral ectoderm	WHL22.565029	Sp-Arp2	actin-related protein 2 (LOC579126), transcript variant X2, mRNA	SPU_018717	NA	Actin	NA
9.32649e-19	0.284901	0.041	0.001	1.45297e-14	lower oral ectoderm	WHL22.205830	Sp-Unc44L_68; Sp-AnkrpL; Sp-Trpa1_2	transient receptor potential cation channel subfamily A member 1 homolog (LOC579399), mRNA	SPU_011004; SPU_011005; SPU_027910	ion transport; transmembrane transport; ion channel activity; protein binding; membrane	Ankyrin repeats (3 copies); Ankyrin repeats (many copies); Ankyrin repeat	NA
1.00048e-18	1.14483	0.26	0.046	1.55865e-14	lower oral ectoderm	WHL22.126954	Sp-Ttyh2	protein tweety homolog 1-B (LOC585805), transcript variant X3, mRNA	SPU_007588	NA	Tweety	Unclassified
2.05374e-18	0.762007	0.096	0.007	3.19953e-14	lower oral ectoderm	WHL22.468438	Sp-Unk_33	ankyrin repeat and fibronectin type-III domain-containing protein 1 (LOC581770), mRNA	SPU_027967	signal transduction; protein binding	Ankyrin repeats (many copies); Fibronectin type III domain; Ras association (RalGDS/AF-6) domain	NA
7.04593e-18	1.20923	0.247	0.044	1.09769e-13	lower oral ectoderm	WHL22.171410	SPU_009026; Sp-Shark	tyrosine-protein kinase HTK16 (LOC752814), mRNA	SPU_009026; SPU_015545	protein binding	SH2 domain	Unclassified
7.96613e-18	0.423114	0.068	0.004	1.24104e-13	lower oral ectoderm	WHL22.209178	Sp-C20orf54_1	solute carrier family 52, riboflavin transporter, member 3-A (LOC577527), mRNA	SPU_011805	NA	Protein of unknown function (DUF1011)	Homolog-of-gene-with-unknown-function
1.12687e-17	1.19388	0.342	0.078	1.75555e-13	lower oral ectoderm	WHL22.263711	Sp-Tkt	transketolase (LOC576207), transcript variant X2, mRNA	SPU_016441	metabolic process; catalytic activity	Transketolase, thiamine diphosphate binding domain; Transketolase, pyrimidine binding domain; Transketolase, C-terminal domain	Metabolism_Carbohydrate
4.00661e-17	0.623817	0.11	0.01	6.24189e-13	lower oral ectoderm	WHL22.476439	Sp-Hypp_466; Sp-Plxnb1_1	plexin-B1 (LOC578743), transcript variant X1, mRNA	SPU_005872; SPU_026089	RNA-dependent DNA replication; signal transduction; RNA binding; RNA-directed DNA polymerase activity; protein binding; intracellular	Plexin cytoplasmic RasGAP domain; Reverse transcriptase (RNA-dependent DNA polymerase)	NA
6.7482e-17	1.41158	0.521	0.197	1.0513e-12	lower oral ectoderm	WHL22.228191	Sp-Arp2/3cs4	actin-related protein 2/3 complex subunit 4 (LOC588038), mRNA	SPU_012228	actin filament polymerization; Arp2/3 complex-mediated actin nucleation; cytoskeleton; Arp2/3 protein complex	ARP2/3 complex 20 kDa subunit (ARPC4)	NA
2.76771e-16	1.1121	0.288	0.061	4.31182e-12	lower oral ectoderm	WHL22.497021	WHL22.497021	uncharacterized LOC100894134 (LOC100894134), ncRNA	NA	NA	NA	NA
3.99676e-16	1.06186	0.342	0.083	6.22656e-12	lower oral ectoderm	WHL22.469808	Sp-Hypp_1875	uncharacterized LOC593892 (LOC593892), mRNA	SPU_009839	NA	NA	NA
5.134e-16	0.373197	0.014	0	7.99825e-12	lower oral ectoderm	WHL22.549294	SPU_007030	uncharacterized LOC589083 (LOC589083), mRNA	SPU_007030	NA	NA	NA
7.7903e-16	0.784048	0.096	0.008	1.21365e-11	lower oral ectoderm	WHL22.686728	Sp-Rap1gap	rap1 GTPase-activating protein 1 (LOC100889245), transcript variant X3, mRNA	SPU_005447	regulation of small GTPase mediated signal transduction; GTPase activator activity; GTPase regulator activity	Rap/ran-GAP	Unclassified
1.33817e-15	0.336122	0.027	0.001	2.08473e-11	lower oral ectoderm	WHL22.603624	Sp-Dennd3	DENN domain-containing protein 3 (LOC100891864), transcript variant X1, mRNA	SPU_002015	protein binding	DENN (AEX-3) domain	Unclassified
1.36112e-15	0.366413	0.041	0.002	2.12049e-11	lower oral ectoderm	WHL22.732692	Sp-Hypp_449; Sp-Fh1/Fh2cph	histone acetyltransferase KAT6B-like (LOC105446470), transcript variant X1, mRNA	SPU_005488; SPU_025223	NA	NA	NA
1.10749e-14	1.23866	0.219	0.041	1.72536e-10	lower oral ectoderm	WHL22.603799	SPU_023245	drebrin-like protein B (LOC587603), mRNA	SPU_023245	actin binding; protein binding; intracellular	Variant SH3 domain; SH3 domain; Cofilin/tropomyosin-type actin-binding protein	NA
1.39922e-14	0.748865	0.068	0.005	2.17985e-10	lower oral ectoderm	WHL22.425714	Sp-Slc6a5-2	sodium- and chloride-dependent neutral and basic amino acid transporter B(0+) (LOC580659), transcript variant X1, mRNA	SPU_016010	neurotransmitter transport; neurotransmitter:sodium symporter activity; integral component of membrane	Sodium:neurotransmitter symporter family	NA
2.10449e-14	0.46156	0.041	0.002	3.27858e-10	lower oral ectoderm	WHL22.517232	Sp-Tctex1d2	tctex1 domain-containing protein 2-like (LOC763411), mRNA	SPU_014108	NA	Tctex-1 family	NA
4.09833e-14	0.689316	0.096	0.009	6.38479e-10	lower oral ectoderm	WHL22.1841	Sp-Tp53bp2	transcriptional protein SWT1 (LOC100892741), transcript variant X2, mRNA	SPU_014967	protein binding	Protein of unknown function (DUF2465); Ankyrin repeats (3 copies); Ankyrin repeat	NA
7.54787e-14	1.04777	0.164	0.026	1.17588e-09	lower oral ectoderm	WHL22.678132	Sp-Slc44a2_1; Sp-Slc44a2_2	choline transporter-like protein 2 (LOC588147), mRNA	SPU_014341; SPU_015348	NA	Plasma-membrane choline transporter	Homolog-of-gene-with-unknown-function
8.13697e-14	0.891237	0.164	0.026	1.26766e-09	lower oral ectoderm	WHL22.759837	Sp-Hypp_3069; Sp-Pragmin	pseudopodium-enriched atypical kinase 1 (LOC752284), transcript variant X2, mRNA	SPU_009006; SPU_019293	NA	NA	NA
8.6761e-14	0.781123	0.096	0.01	1.35165e-09	lower oral ectoderm	WHL22.511497	Sp-Form1ph	formin-like protein 2 (LOC591753), transcript variant X1, mRNA	SPU_007887	actin cytoskeleton organization; actin binding; binding; Rho GTPase binding	Formin Homology 2 Domain; Diaphanous GTPase-binding Domain	NA
1.60957e-13	0.428454	0.068	0.005	2.50755e-09	lower oral ectoderm	WHL22.723813	SPU_024808; Sp-Ddx42	ATP-dependent RNA helicase DDX42 (LOC756991), mRNA	SPU_024808; SPU_028397	NA	NA	NA
1.92742e-13	0.738989	0.096	0.01	3.00272e-09	lower oral ectoderm	WHL22.588694	WHL22.588694	rho GTPase-activating protein 12 (LOC586010), mRNA	NA	NA	NA	NA
2.5263e-13	0.803245	0.863	0.502	3.93572e-09	lower oral ectoderm	WHL22.771108	Sp-Egfi; Sp-FibropellinL3	fibropellin I (egf1), transcript variant X4, mRNA	SPU_012655; SPU_027090	calcium ion binding; protein binding	EGF-like domain; Human growth factor-like EGF; Calcium-binding EGF domain	NA
3.94049e-13	1.03851	0.384	0.118	6.13889e-09	lower oral ectoderm	WHL22.331647	Sp-Ttrspn_10	tetraspanin-1 (LOC576118), mRNA	SPU_012385	integral component of membrane	Tetraspanin family	Transmembrane
7.43627e-13	0.644587	0.082	0.008	1.1585e-08	lower oral ectoderm	WHL22.191742	Sp-Pap	iron/zinc purple acid phosphatase-like protein (LOC580652), transcript variant X1, mRNA	SPU_019301	acid phosphatase activity; hydrolase activity; metal ion binding	Calcineurin-like phosphoesterase; Purple acid Phosphatase, N-terminal domain; Iron/zinc purple acid phosphatase-like protein C	Metabolism_Carbohydrate
8.11355e-13	0.711211	0.055	0.004	1.26401e-08	lower oral ectoderm	WHL22.620686	Sp-Hypp_1789	dentin matrix acidic phosphoprotein 1 (LOC100892082), mRNA	SPU_008523	NA	NA	NA
1.37746e-12	0.955335	0.247	0.057	2.14594e-08	lower oral ectoderm	WHL22.476970	SPU_002611; Sp-Eph2; Sp-Eph_1; SPU_020895; Sp-Hypp_1003	protein enabled homolog (LOC576114), transcript variant X4, mRNA	SPU_002611; SPU_007845; SPU_010763; SPU_020895; SPU_020896	NA	WH1 domain	Unclassified
1.93578e-12	0.546104	0.068	0.006	3.01574e-08	lower oral ectoderm	WHL22.424641	Sp-Rapgef1	rap guanine nucleotide exchange factor 1 (LOC100892239), mRNA	SPU_018323	small GTPase mediated signal transduction; regulation of small GTPase mediated signal transduction; guanyl-nucleotide exchange factor activity; intracellular	RasGEF domain; RasGEF N-terminal motif	Unclassified
2.63267e-12	0.731191	0.164	0.028	4.10143e-08	lower oral ectoderm	WHL22.732657	Sp-Hypp_449; Sp-Fhod3; Sp-Fhod3_1; Sp-Fh1/Fh2cph	FH1/FH2 domain-containing protein 3 (LOC587533), mRNA	SPU_005488; SPU_005489; SPU_023139; SPU_025223	NA	NA	NA
2.64661e-12	0.843047	0.274	0.066	4.12316e-08	lower oral ectoderm	WHL22.342188	Sp-Hypp_2950	uncharacterized LOC586595 (LOC586595), mRNA	SPU_028317	NA	NA	NA
3.74543e-12	1.0213	0.603	0.307	5.83501e-08	lower oral ectoderm	WHL22.111073	Sp-Arp2/3cs2	actin-related protein 2/3 complex subunit 2 (LOC585943), mRNA	SPU_017502	regulation of actin filament polymerization; cytoskeleton	Arp2/3 complex, 34 kD subunit p34-Arc	Cytoskeleton_Cytokinesis
4.14221e-12	0.394018	0.055	0.004	6.45315e-08	lower oral ectoderm	WHL22.676498	Sp-Inpp5dL; Sp-Inpp5d; SPU_026717	phosphatidylinositol 3,4,5-trisphosphate 5-phosphatase 2B (LOC584901), transcript variant X1, mRNA	SPU_000211; SPU_024807; SPU_026717	protein binding	SH2 domain	Phosphatase_Inositol
4.2442e-12	1.01852	0.123	0.017	6.61204e-08	lower oral ectoderm	WHL22.718063	Sp-Sh3pxd2a	SH3 and PX domain-containing protein 2A (LOC577780), transcript variant X4, mRNA	SPU_019963	protein binding; phosphatidylinositol binding	SH3 domain; Variant SH3 domain; Variant SH3 domain	Unclassified
5.61734e-12	0.833621	0.192	0.037	8.75125e-08	lower oral ectoderm	WHL22.21918	SPU_020922	chromatin modification-related protein eaf-1 (LOC100889016), transcript variant X1, mRNA	SPU_020922	NA	NA	NA
[truncated: 5,936 more rows]

## Sheet: Sp_3dpf_all genes_positive
avg.exp	pct.exp	features.plot	cluster	avg.exp.scaled	name	NCBI.anotation	SPU.ID	GOterm	PFAM.term	Functional.term
[truncated: 111,402 more rows]

## Sheet: Sp_3dpf_all_genes_negative
avg.exp	pct.exp	features.plot	cluster	avg.exp.scaled	name	NCBI.anotation	SPU.ID	GOterm	PFAM.term	Functional.term
[truncated: 215,715+ more rows]

[truncated: 5 more sheets: Homeobox TFs, Forkhead TFs, Ets TFs, Zinc TFs, Pdx1 maso targets (pdx neurons)]
