# Supplementary material for: Single-cell RNA sequencing of the Strongylocentrotus purpuratus larva reveals the blueprint of major cell types and nervous system of a non-chordate deuterostome
Source: eLife. 2021 Nov 25;10:e70416. doi: 10.7554/eLife.70416 (PMC8683087; doi:10.7554/eLife.70416)
Supplement: Supplementary file 2. [file elife-70416-supp2.xlsx]

## Sheet: Sheet1
Gene name	Forward Primer	Reverse Primer
Sp-Ahrl	GCTTTCATCACGTCGACCTC	TGGCTGAAAACACTCCATGC
Sp-Alpi	GGCTTCTTTCTCATGGTGGA	GCAACGCGCAAGTACAGTAG
Sp-Bra	CACCCTTTCACCGCCACTAT	AGAGATCATGTCCGTCGTTTCTA
Sp-Chordin	ACCAGGGTCACATCAGAAGG	GCAGCATTCGCCTTTAGTTC
Sp-Chrna9_4	ACACGGAAAACCGTCTCATC	CCGACAGTGCCTCTTTCTTC
Sp-Cyp2L42	TGACAGCTCGAAGAAGCTCA	GGACCAGGAAAGTGGTGAAA
Sp-Ddc	CCACCGATGACAAAGGTTCT	CCAGGCATACGTCATGTGTC
Sp-Delta	GTGCGCTGAAACCTACTACG	CCTCAGTTGCGTGTAATCCG
Sp-Emx	CGGCGGAGTTATTTCGACC	TCCCTCTCCCTCTCTTCGAT
Sp-FbsL_2	TTTCACACGCTTCATCATCC	TGATAGCTGCTGCTCCACAT
Sp-FcolI/II/III	GCAAGTGTTCGCTTTGATGA	TGTCCGTCACAATGACACCT
Sp-FgfR1	GCAAGTGTTCGCTTTGATGA	TGTCCGTCACAATGACACCT
Sp-FoxABL	TGATAAGATACCTATGTCTTATGAACG	TCGATTAAAATGAAGGTAATGTGC
Sp-FoxJ2	AATGGCTGGGTCAACTGAAT	CTCTGGTGGACTACCCGTTG
Sp-FoxP	CACCATCTACAGCTCCAGCA	CGTAATTGTCGGTCAGGT
Sp-Frizz5/8	GTGGAACAATCCATCAGTTG	CGTGGTTGCCTACGTAACAG
Sp-Hbn	CTCGAGTCCCAGTGGGTTTA	ACTGAGAGCGGTGAACTTGG
Sp-Hnf4	GGTGGACAAGGACAAGAGGA	TGAGCTGTAGCAGCTGAGGA
Sp-Hypp_1249	AAGCCTACCGAGTCAGATTGC	TTACTGCTTGAAAATAAACATTGAGA
Sp-Hypp_2386	TGTCCTCGCTCAGGAAGATT	CGGCTTTATAGGCCAATCC
Sp-IrxA	TGCGTATGCTGACTTGAAGG	GGCGGTGATACCACTCTGAT
Sp-Kisspeptin	TCACGGTCCTATTGGCTCTC	GAAAGGCAGGAAGTGGGGTA
Sp-Kp	TCACGGTCCTATTGGCTCTC	GAAAGGCAGGAAGTGGGGTA
Sp-MacpfA2	TACCCCAGTCATCCTTCTCG	GTTCCAGGTGAACTCCGTGT
Sp-Mlckb	TGCACCAAGGATACCATCAA	ACAGAGCAGCACCAGTTCCT
Sp-MsxI	CGCCACTCACCAACTATTCG	ATGGGAAGGAGAAGCAGCAT
Sp-Nacha6	ATGGAGGCCAGACATTGTTC	GCAAGAAGGAACACCCACAT
Sp-Nk1	CCCACCATCCGAGTAACATC	GACCATGCATGTGCGTAAAC
Sp-Nkx6.1	TCCGAATCGATGATTTCTCTG	TCGTCAATGTCTGCTTCGAC
Sp-Otp	CACCGATGAACGACTCCTTT	ATCAATGTCGCACCAATTCA
Sp-Otx	CGATCATTTAGCAGCGAACA	AGAGCTGCGTTCAAGGTCAT
Sp-Prox1	GGGATCCTATCGCATCTTCA	CTCCGGTACCGTGAACTCAT
Sp-Rfxc1l	CGTGATCAAGTTGGTGGTTG	TCCGAATCAGATGGAAGGAC
Sp-Serp2; Sp-Serp3	TACGAAAATGCGTGGATTGA	GGATCCGAGACATCCAAGAA
Sp-Six3	ATGGCTTGCGATATGAGCGA	TCTGGCGCGTAGAACACTTT
Sp-SoxC	GCAGTCACAGCAGATTCCAA	AATCATGGACGAAAGCAGCC
Sp-Tob	GACTTCCTCCGAAGCCATCT	CGCAATCATTGAGGGTTGTT
Sp-Tph	ATCGAATCGAGAAAGGCTCA	GGTCAATTCGTCTCGGACAT
SPU_002797	ACAACCGTCTCCATGACTCC	ACTCCTGCCTCTCCTTCCTC
SPU_006199	GGCAAAAACCCCCAAATAAC	TGGTATTGGCGGCATACTTT
SPU_008104	TCTTCTCCTTCTCGGCTTTG	TGAAGTTTTGCACGTTGAGG
SPU_010640	GCTGAAACGGATCCAGAAAC	TCCGTCTGCACTCTTTGATG
SPU_016308	CGTCTGTGTACATGGTGTGC	GTGTTGCTCTTGCTCCCAAT
SPU_021898	GTCCAAGTTGCTCGTTCTCG	AGGTGGGTAGACGCATTCTG
